# Supplementary material for: Causal Gut Microbiota-Bone Links: Pleiotropic Effects and Stearidonate Mediation
Source: Research Square preprint supplement (doi:10.21203/rs.3.rs-6281295/v1), 2025-04-01
Supplement: Supplementary file 1 [file 1009be9c2fe06986984d46bf.xlsx]

## Sheet: Supplementary Table 1
Supplementary Table 1. The Detailed information on above those studies for GM taxa and BMD.
GWAS dataset study	detailed imformation	Ancestry	Links for downloading summary-level data
Gut microbiota GWAS
Effect of host genetics on the gut microbiome in 7,738 participants of the Dutch Microbiome Project.	207 GM taxa for 7,738 participants	European	https://dutchmicrobiomeproject.molgeniscloud.org
Combined effects of host genetics and diet on human gut microbiota and incident disease in a single population cohort.	469 GM taxa for 5,959 participants	European	https://www.ebi.ac.uk/gwas; GCST90032172-GCST90032644
Genome-wide association study in 8,956 German individuals identifies influence of ABO histo-blood groups on gut microbiome.	232 GM taxa for 8,956 participants	European	https://www.ebi.ac.uk/gwas; GCST90011301–GCST90011730
Large-scale association analyses identify host factors influencing human gut microbiome composition.	196 GM taxa for 18340 participants	European	https://www.mibiogen.org
Bone mineral density study
An atlas of genetic influences on osteoporosis in humans and mice	eBMD for 426,824 participants	European	http://www.gefos.org/?q=content/data-release-2018
Abbreviations: GM, gut microbiota; eBMD, UK Biobank bone mineral density as estimated by heel quantitative ultrasound; TB, life-course meta-analysis of Total body BMD; LS, Lumbar Spine bone mineral density; FA, Forearm bone mineral density; FN, femoral Neck bone mineral density

## Sheet: Supplementary Table 2
Supplementary Table 2. Estimated LDSC polygenic SNP heritability for 1,104 gut microbiota taxa GWASs.
Gut microbiota taxon	study	sample_size	n_snps	obs_h2	obs_h2_se	scale_h2_z	included
Absiella dolichum	FINRISK	5959	1127096	0.187	0.0815	2.29448	yes
Acetobacteraceae	FINRISK	5959	1127096	-0.0192	0.0797	-0.240903	no
Acetobacterales	FINRISK	5959	1127096	-0.0207	0.0765	-0.270588	no
Achromobacter	FINRISK	5959	1127096	-0.0048	0.0776	-0.0618557	no
Acidaminococcus fermentans	FINRISK	5959	1127096	-0.1036	0.0696	-1.48851	no
Acidaminococcus sp900315205	FINRISK	5959	1127096	-0.1326	0.0783	-1.69349	no
Acidobacteriales	FINRISK	5959	1127096	-0.0935	0.0773	-1.20957	no
Actinobacteria	FINRISK	5959	1127096	0.2448	0.1767	1.3854	no
Actinobacteriota	FINRISK	5959	1127096	0.1673	0.1294	1.29289	no
Actinomycetales	FINRISK	5959	1127096	0.2531	0.1678	1.50834	no
Agathobacter sp000434275	FINRISK	5959	1127096	0.1144	0.0907	1.2613	no
Akkermansia muciniphila B	FINRISK	5959	1127096	-0.0389	0.0796	-0.488693	no
Aliivibrio	FINRISK	5959	1127096	-0.1487	0.0723	-2.05671	no
Alistipes shahii	FINRISK	5959	1127096	-0.1497	0.0732	-2.04508	no
Alistipes	FINRISK	5959	1127096	-0.0436	0.0769	-0.56697	no
Alloprevotella	FINRISK	5959	1127096	-0.0602	0.0723	-0.832642	no
Alteromonadaceae	FINRISK	5959	1127096	0.1379	0.0788	1.75	yes
An181	FINRISK	5959	1127096	0.1171	0.0779	1.50321	no
An7	FINRISK	5959	1127096	0.038	0.0747	0.508701	no
Anaeromassilibacillus sp001305115	FINRISK	5959	1127096	0.0969	0.0759	1.27668	no
Aneurinibacillaceae	FINRISK	5959	1127096	-0.0721	0.078	-0.924359	no
Aneurinibacillales	FINRISK	5959	1127096	-0.0754	0.0796	-0.947236	no
AR31	FINRISK	5959	1127096	-0.168	0.0777	-2.16216	no
Atopobiaceae	FINRISK	5959	1127096	-0.0417	0.0782	-0.533248	no
Aureimonas	FINRISK	5959	1127096	0.019	0.0784	0.242347	no
Azorhizobium	FINRISK	5959	1127096	0.0503	0.0729	0.689986	no
Bacillaceae A	FINRISK	5959	1127096	0.0359	0.0834	0.430456	no
Bacillales A	FINRISK	5959	1127096	-0.0286	0.0767	-0.372881	no
Bacilli A	FINRISK	5959	1127096	0.0722	0.0882	0.818594	no
Bacillus AY	FINRISK	5959	1127096	-0.0913	0.0768	-1.1888	no
Bacillus C	FINRISK	5959	1127096	-0.0819	0.07	-1.17	no
Bacillus	FINRISK	5959	1127096	-0.0915	0.0651	-1.40553	no
Bacillus U	FINRISK	5959	1127096	0.0206	0.0851	0.242068	no
Bacillus velezensis	FINRISK	5959	1127096	0.1125	0.083	1.35542	no
Bacteroides A plebeius A	FINRISK	5959	1127096	0.0657	0.0809	0.812114	no
Bacteroides A plebeius	FINRISK	5959	1127096	0.1854	0.081	2.28889	yes
Bacteroides A	FINRISK	5959	1127096	0.1352	0.0829	1.63088	no
Bacteroides clarus	FINRISK	5959	1127096	0.1039	0.0721	1.44105	no
Bacteroides eggerthii	FINRISK	5959	1127096	0.0775	0.0721	1.0749	no
Bacteroides faecis	FINRISK	5959	1127096	0.034	0.0717	0.474198	no
Bacteroides intestinalis A	FINRISK	5959	1127096	-0.0934	0.0835	-1.11856	no
Bacteroides sp002160055	FINRISK	5959	1127096	0.0666	0.0755	0.882119	no
Bacteroides sp003545565	FINRISK	5959	1127096	0.0046	0.0723	0.0636238	no
Bacteroides stercoris	FINRISK	5959	1127096	0.0478	0.0703	0.679943	no
Bacteroides thetaiotaomicron	FINRISK	5959	1127096	-0.0129	0.0797	-0.161857	no
Barnesiellaceae	FINRISK	5959	1127096	-0.061	0.0714	-0.854342	no
Barnesiella	FINRISK	5959	1127096	-0.065	0.0712	-0.912921	no
Bifidobacteriaceae	FINRISK	5959	1127096	0.225	0.1583	1.42135	no
Bifidobacterium adolescentis	FINRISK	5959	1127096	0.1698	0.1288	1.31832	no
Bifidobacterium angulatum	FINRISK	5959	1127096	0.1733	0.1349	1.28466	no
Bifidobacterium bifidum	FINRISK	5959	1127096	0.0651	0.103	0.632039	no
Bifidobacterium breve	FINRISK	5959	1127096	0.2962	0.1603	1.84779	yes
Bifidobacterium catenulatum	FINRISK	5959	1127096	0.1857	0.1218	1.52463	no
Bifidobacterium infantis	FINRISK	5959	1127096	0.3076	0.1296	2.37346	yes
Bifidobacterium kashiwanohense	FINRISK	5959	1127096	0.2275	0.1233	1.84509	yes
Bifidobacterium longum	FINRISK	5959	1127096	0.2444	0.1206	2.02653	yes
Bifidobacterium pseudocatenulatum	FINRISK	5959	1127096	0.2099	0.127	1.65276	yes
Bifidobacterium ruminantium	FINRISK	5959	1127096	0.349	0.1426	2.44741	yes
Bifidobacterium	FINRISK	5959	1127096	0.2606	0.1793	1.45343	no
Bin127	FINRISK	5959	1127096	-0.0073	0.0695	-0.105036	no
Blautia A sp000285855	FINRISK	5959	1127096	0.052	0.0796	0.653266	no
Blautia A sp002159835	FINRISK	5959	1127096	0.0472	0.0833	0.566627	no
Blautia A sp900066145	FINRISK	5959	1127096	-0.0083	0.0823	-0.100851	no
Blautia A sp900066355	FINRISK	5959	1127096	0.0246	0.0731	0.336525	no
Blautia hansenii	FINRISK	5959	1127096	0.0322	0.0845	0.381065	no
Blautia sp000436935	FINRISK	5959	1127096	0.0935	0.0801	1.16729	no
Blautia sp001304935	FINRISK	5959	1127096	0.0962	0.077	1.24935	no
Borreliaceae	FINRISK	5959	1127096	-0.1128	0.0762	-1.48031	no
Borreliales	FINRISK	5959	1127096	-0.1298	0.0752	-1.72606	no
Brachyspiraceae	FINRISK	5959	1127096	0.021	0.0809	0.25958	no
Brachyspirae	FINRISK	5959	1127096	0.0068	0.079	0.0860759	no
Brachyspirales	FINRISK	5959	1127096	0.0124	0.0806	0.153846	no
Brachyspira	FINRISK	5959	1127096	0.0058	0.0805	0.0720497	no
Brevibacillaceae	FINRISK	5959	1127096	-0.0254	0.0821	-0.309379	no
Brevibacillales	FINRISK	5959	1127096	-0.0323	0.0804	-0.401741	no
Brevibacillus B	FINRISK	5959	1127096	-0.041	0.0819	-0.500611	no
Butyricimonas sp900258545	FINRISK	5959	1127096	-0.0577	0.0778	-0.741645	no
CAG-1000 sp000434555	FINRISK	5959	1127096	-0.0025	0.0756	-0.0330688	no
CAG-1000	FINRISK	5959	1127096	0.002	0.074	0.027027	no
CAG-1031	FINRISK	5959	1127096	0.0981	0.0709	1.38364	no
CAG-110	FINRISK	5959	1127096	0.1096	0.0984	1.11382	no
CAG-145 sp000435615	FINRISK	5959	1127096	-0.001	0.0799	-0.0125156	no
CAG-145 sp002320005	FINRISK	5959	1127096	0.0649	0.075	0.865333	no
CAG-145	FINRISK	5959	1127096	0.0314	0.0798	0.393484	no
CAG-170 sp003516765	FINRISK	5959	1127096	-0.051	0.076	-0.671053	no
CAG-177 sp002438685	FINRISK	5959	1127096	0.0709	0.0798	0.888471	no
CAG-177 sp002451755	FINRISK	5959	1127096	0.0947	0.0843	1.12337	no
CAG-177 sp003514385	FINRISK	5959	1127096	0.111	0.0824	1.34709	no
CAG-177 sp003538135	FINRISK	5959	1127096	0.1032	0.1022	1.00978	no
CAG-177	FINRISK	5959	1127096	0.1233	0.0862	1.43039	no
CAG-180 sp000432435	FINRISK	5959	1127096	-0.0765	0.0763	-1.00262	no
CAG-194 sp002441865	FINRISK	5959	1127096	-0.0093	0.0747	-0.124498	no
CAG-245 sp000435175	FINRISK	5959	1127096	0.0308	0.0697	0.441894	no
CAG-245	FINRISK	5959	1127096	0.0674	0.072	0.936111	no
CAG-269 sp001915995	FINRISK	5959	1127096	0.1966	0.0836	2.35167	yes
CAG-269 sp001916065	FINRISK	5959	1127096	-0.1162	0.0716	-1.62291	no
CAG-269 sp002372935	FINRISK	5959	1127096	0.017	0.0765	0.222222	no
CAG-273 sp003507395	FINRISK	5959	1127096	0.1071	0.0836	1.2811	no
CAG-273 sp003534295	FINRISK	5959	1127096	0.1989	0.0813	2.44649	yes
CAG-274 sp000432155	FINRISK	5959	1127096	-0.0482	0.078	-0.617949	no
CAG-302	FINRISK	5959	1127096	0.0495	0.0832	0.594952	no
CAG-345 sp000433315	FINRISK	5959	1127096	0.1587	0.0775	2.04774	yes
CAG-345	FINRISK	5959	1127096	0.1782	0.0772	2.30829	yes
CAG-349	FINRISK	5959	1127096	0.0539	0.0987	0.546099	no
CAG-390 sp003523225	FINRISK	5959	1127096	0.1957	0.1116	1.75358	yes
CAG-433	FINRISK	5959	1127096	0.0569	0.077	0.738961	no
CAG-448 sp000433415	FINRISK	5959	1127096	0.1535	0.083	1.8494	yes
CAG-448 sp003150135	FINRISK	5959	1127096	-0.052	0.0788	-0.659898	no
CAG-448	FINRISK	5959	1127096	-0.0065	0.08	-0.08125	no
CAG-449	FINRISK	5959	1127096	0.1261	0.0824	1.53034	no
CAG-452 sp000434035	FINRISK	5959	1127096	0.0924	0.0791	1.16814	no
CAG-452	FINRISK	5959	1127096	0.087	0.0764	1.13874	no
CAG-465 sp000433135	FINRISK	5959	1127096	-0.0275	0.0797	-0.345044	no
CAG-475	FINRISK	5959	1127096	0.0132	0.0796	0.165829	no
CAG-485 sp002362485	FINRISK	5959	1127096	0.1164	0.0873	1.33333	no
CAG-485 sp002404675	FINRISK	5959	1127096	-0.0731	0.0799	-0.914894	no
CAG-488 sp000434055	FINRISK	5959	1127096	-0.0066	0.0737	-0.0895522	no
CAG-488	FINRISK	5959	1127096	0.0533	0.0856	0.622664	no
CAG-495	FINRISK	5959	1127096	0.0526	0.0806	0.652605	no
CAG-510 sp002432425	FINRISK	5959	1127096	-0.1018	0.0736	-1.38315	no
CAG-552	FINRISK	5959	1127096	-0.0611	0.0884	-0.691176	no
CAG-590 sp000431135	FINRISK	5959	1127096	0.0124	0.0715	0.173427	no
CAG-632	FINRISK	5959	1127096	-0.036	0.0865	-0.416185	no
CAG-698	FINRISK	5959	1127096	0.0548	0.0694	0.789625	no
CAG-776 sp000438195	FINRISK	5959	1127096	0.081	0.0729	1.11111	no
CAG-776	FINRISK	5959	1127096	0.0757	0.0741	1.02159	no
CAG-81 sp000435795	FINRISK	5959	1127096	0.0489	0.1263	0.387173	no
CAG-822 sp000432855	FINRISK	5959	1127096	-0.0124	0.0746	-0.16622	no
CAG-822	FINRISK	5959	1127096	0.0087	0.075	0.116	no
CAG-826	FINRISK	5959	1127096	0.029	0.0726	0.399449	no
CAG-83 sp000435555	FINRISK	5959	1127096	0.1117	0.0774	1.44315	no
CAG-83 sp002392625	FINRISK	5959	1127096	-0.0345	0.0804	-0.429104	no
CAG-841 sp002479075	FINRISK	5959	1127096	0.0588	0.0764	0.769634	no
CAG-873 sp001701165	FINRISK	5959	1127096	-0.0124	0.0757	-0.163804	no
CAG-877 sp000433455	FINRISK	5959	1127096	-0.0175	0.0767	-0.228162	no
CAG-877	FINRISK	5959	1127096	-0.0045	0.0765	-0.0588235	no
CAG-882 sp003486385	FINRISK	5959	1127096	0.0508	0.0947	0.536431	no
CAG-884 sp000433875	FINRISK	5959	1127096	0.0957	0.0776	1.23325	no
CAG-884	FINRISK	5959	1127096	0.0879	0.0782	1.12404	no
CAG-977	FINRISK	5959	1127096	-0.0123	0.0821	-0.149817	no
Caloranaerobacteraceae	FINRISK	5959	1127096	-0.0153	0.0817	-0.187271	no
Caloranaerobacter	FINRISK	5959	1127096	-0.04	0.0793	-0.504414	no
Campylobacter D	FINRISK	5959	1127096	0.0192	0.0707	0.27157	no
Cetobacterium A	FINRISK	5959	1127096	-0.0736	0.074	-0.994595	no
CHKCI006 sp900018345	FINRISK	5959	1127096	0.1622	0.0702	2.31054	yes
Chloroflexales	FINRISK	5959	1127096	-0.0834	0.078	-1.06923	no
Chromatiales	FINRISK	5959	1127096	0.0686	0.0783	0.876117	no
Chromobacteriaceae	FINRISK	5959	1127096	0.0183	0.0784	0.233418	no
Citrobacter A	FINRISK	5959	1127096	-0.0253	0.0722	-0.350416	no
Clostridia	FINRISK	5959	1127096	0.1048	0.1191	0.879933	no
Clostridium E sporosphaeroides	FINRISK	5959	1127096	0.144	0.0847	1.70012	yes
Clostridium I	FINRISK	5959	1127096	-0.1005	0.0715	-1.40559	no
Clostridium M clostridioforme	FINRISK	5959	1127096	-0.0232	0.0885	-0.262147	no
Clostridium M sp001304855	FINRISK	5959	1127096	0.0768	0.073	1.05205	no
Clostridium P	FINRISK	5959	1127096	-0.0844	0.0757	-1.11493	no
Clostridium saudiense	FINRISK	5959	1127096	0.1334	0.0774	1.72351	yes
Clostridium S felsineum	FINRISK	5959	1127096	0.0372	0.0674	0.551929	no
Clostridium tertium	FINRISK	5959	1127096	0.1297	0.0722	1.7964	yes
Collinsella	FINRISK	5959	1127096	0.0224	0.0774	0.289406	no
Comamonas B	FINRISK	5959	1127096	-0.0538	0.0755	-0.712583	no
Comamonas	FINRISK	5959	1127096	0.0667	0.0704	0.947443	no
Coprobacillus cateniformis	FINRISK	5959	1127096	0.0153	0.0793	0.192938	no
Coprobacillus	FINRISK	5959	1127096	0.0292	0.0791	0.369153	no
Coprobacter secundus	FINRISK	5959	1127096	-0.0751	0.0774	-0.970284	no
Corynebacterium	FINRISK	5959	1127096	-0.0638	0.0754	-0.846154	no
Cyanobacteria	FINRISK	5959	1127096	0.012	0.0878	0.136674	no
Demequinaceae	FINRISK	5959	1127096	-0.0388	0.0778	-0.498715	no
Demequina	FINRISK	5959	1127096	-0.0199	0.0797	-0.249686	no
Desulfobacterota A	FINRISK	5959	1127096	0.0271	0.0773	0.350582	no
Desulfovibrionaceae	FINRISK	5959	1127096	0.0208	0.0765	0.271895	no
Desulfovibrionales	FINRISK	5959	1127096	0.0118	0.0762	0.154856	no
Desulfovibrionia	FINRISK	5959	1127096	0.0311	0.077	0.403896	no
Desulfovibrio piger	FINRISK	5959	1127096	0.0828	0.0835	0.991617	no
Dialister sp000434475	FINRISK	5959	1127096	0.0359	0.08	0.44875	no
Dokdonella	FINRISK	5959	1127096	-0.0044	0.0718	-0.0612813	no
Dorea phocaeense	FINRISK	5959	1127096	0.0054	0.0741	0.0728745	no
DTU024 sp002411105	FINRISK	5959	1127096	-0.0356	0.0835	-0.426347	no
Dysgonomonadaceae	FINRISK	5959	1127096	0.0321	0.0776	0.41366	no
Eisenbergiella sp900066775	FINRISK	5959	1127096	0.0296	0.0839	0.352801	no
Elusimicrobiaceae	FINRISK	5959	1127096	0.0215	0.0853	0.252052	no
Elusimicrobia	FINRISK	5959	1127096	0.0883	0.0781	1.1306	no
Elusimicrobiota	FINRISK	5959	1127096	0.0341	0.0728	0.468407	no
Emergencia	FINRISK	5959	1127096	0.0326	0.0753	0.432935	no
Endozoicomonadaceae	FINRISK	5959	1127096	-0.0507	0.071	-0.714085	no
Enorma massiliensis	FINRISK	5959	1127096	-0.0185	0.0749	-0.246996	no
Ensifer	FINRISK	5959	1127096	0.0893	0.0885	1.00904	no
Enterobacteriaceae	FINRISK	5959	1127096	-0.0477	0.0706	-0.675637	no
Enterococcaceae	FINRISK	5959	1127096	-0.0479	0.0708	-0.676554	no
Enterococcus A	FINRISK	5959	1127096	-0.0705	0.0737	-0.956581	no
Enterococcus B	FINRISK	5959	1127096	0.0425	0.0797	0.53325	no
Enterococcus faecalis	FINRISK	5959	1127096	0.0322	0.0768	0.419271	no
Enterococcus	FINRISK	5959	1127096	0.0391	0.0757	0.516513	no
Enteroscipio	FINRISK	5959	1127096	0.0862	0.072	1.19722	no
ER4 sp002437735	FINRISK	5959	1127096	-0.0283	0.082	-0.345122	no
Eremiobacterota	FINRISK	5959	1127096	-0.0232	0.075	-0.309333	no
Erysipelatoclostridiaceae	FINRISK	5959	1127096	0.0438	0.0784	0.558673	no
Escherichia flexneri	FINRISK	5959	1127096	-0.0406	0.0742	-0.54717	no
Escherichia	FINRISK	5959	1127096	-0.0653	0.0749	-0.871829	no
Eubacterium callanderi	FINRISK	5959	1127096	0.0066	0.0807	0.0817844	no
Eubacterium F sp000434115	FINRISK	5959	1127096	-0.0739	0.0768	-0.96224	no
Eubacterium I ramulus A	FINRISK	5959	1127096	0.1436	0.0825	1.74061	yes
Eubacterium Q	FINRISK	5959	1127096	0.1345	0.0792	1.69823	yes
Eubacterium R coprostanoligenes	FINRISK	5959	1127096	0.0587	0.0794	0.739295	no
Eubacterium R sp000431535	FINRISK	5959	1127096	-0.0219	0.0824	-0.265777	no
Ezakiellaceae	FINRISK	5959	1127096	0.1252	0.0753	1.66268	yes
F0428	FINRISK	5959	1127096	-0.0133	0.0772	-0.17228	no
Faecalibacterium prausnitzii E	FINRISK	5959	1127096	-0.007	0.0751	-0.0932091	no
Faecalibacterium sp002160895	FINRISK	5959	1127096	0.0672	0.0964	0.697095	no
Faecalicatena glycyrrhizinilyticum	FINRISK	5959	1127096	0.1113	0.074	1.50405	no
Faecalicatena lactaris	FINRISK	5959	1127096	0.0535	0.0879	0.608646	no
Faecalicatena sp000364245	FINRISK	5959	1127096	-0.0098	0.0798	-0.122807	no
Faecalicatena sp001517425	FINRISK	5959	1127096	-0.0089	0.0797	-0.111669	no
Faecalicatena sp002161355	FINRISK	5959	1127096	0.0791	0.0939	0.842386	no
Faecalicatena sp002397985	FINRISK	5959	1127096	-0.017	0.0714	-0.238095	no
Faecalicatena torques	FINRISK	5959	1127096	0.1875	0.0796	2.35553	yes
Faecalicoccus pleomorphus	FINRISK	5959	1127096	-0.0122	0.0744	-0.163978	no
Faecalicoccus	FINRISK	5959	1127096	-0.0352	0.0747	-0.471218	no
Faecalitalea cylindroides	FINRISK	5959	1127096	0.0282	0.0773	0.364812	no
Fervidobacteriaceae	FINRISK	5959	1127096	-0.0017	0.0744	-0.0228495	no
Fibrobacteraceae	FINRISK	5959	1127096	0.2782	0.0993	2.80161	yes
Fibrobacterales	FINRISK	5959	1127096	0.2643	0.0964	2.7417	yes
Fibrobacteria	FINRISK	5959	1127096	0.2872	0.0986	2.91278	yes
Fimbriimonadia	FINRISK	5959	1127096	-0.1172	0.0688	-1.70349	no
Firmicutes A	FINRISK	5959	1127096	0.0577	0.1132	0.509717	no
Firmicutes E	FINRISK	5959	1127096	0.0926	0.0813	1.13899	no
Firmicutes I	FINRISK	5959	1127096	0.0292	0.0853	0.342321	no
Flavobacteriales	FINRISK	5959	1127096	-0.0139	0.0752	-0.18484	no
Flavonifractor sp002159265	FINRISK	5959	1127096	0.1495	0.0759	1.9697	yes
Flavonifractor sp900199495	FINRISK	5959	1127096	0.0281	0.0773	0.363519	no
Fournierella massiliensis	FINRISK	5959	1127096	0.0231	0.0801	0.28839	no
Francisellaceae	FINRISK	5959	1127096	0.0509	0.0722	0.704986	no
Francisellales	FINRISK	5959	1127096	0.0512	0.0724	0.707182	no
Fusobacteriaceae	FINRISK	5959	1127096	0.0343	0.0719	0.477051	no
Fusobacterium A	FINRISK	5959	1127096	0.0335	0.0754	0.444297	no
GCA-900066135 sp900066135	FINRISK	5959	1127096	0.1286	0.0894	1.43848	no
GCA-900066495 sp900066495	FINRISK	5959	1127096	0.0711	0.0763	0.931848	no
GCA-900066495	FINRISK	5959	1127096	0.0742	0.0794	0.934509	no
GCA-900066575 sp900066385	FINRISK	5959	1127096	0.1544	0.0809	1.90853	yes
GCA-900066755 sp900066755	FINRISK	5959	1127096	0.1004	0.0747	1.34404	no
GCA-900199385 sp900320755	FINRISK	5959	1127096	0.0388	0.0858	0.452214	no
Geminocystis	FINRISK	5959	1127096	-0.0243	0.0713	-0.340813	no
Gemmatimonadaceae	FINRISK	5959	1127096	-0.0137	0.0743	-0.184388	no
Geobacteraceae	FINRISK	5959	1127096	-0.0615	0.0696	-0.883621	no
Geobacter C	FINRISK	5959	1127096	0.0667	0.0734	0.908719	no
Gillisia	FINRISK	5959	1127096	-0.0759	0.075	-1.012	no
Gluconobacter	FINRISK	5959	1127096	-0.0811	0.074	-1.09595	no
Gordonibacter pamelaeae	FINRISK	5959	1127096	-0.0548	0.081	-0.676543	no
Gordonibacter	FINRISK	5959	1127096	0.041	0.0854	0.480094	no
Gramella	FINRISK	5959	1127096	-0.1224	0.074	-1.65405	no
Haemophilus D sp001679485	FINRISK	5959	1127096	0.1361	0.1515	0.89835	no
Halarcobacter	FINRISK	5959	1127096	0.0588	0.0843	0.697509	no
Halomonadaceae	FINRISK	5959	1127096	-0.0151	0.0758	-0.199208	no
Haloplasmatales	FINRISK	5959	1127096	0.1781	0.1003	1.77567	yes
Helicobacter	FINRISK	5959	1127096	0.0208	0.0735	0.282993	no
Herbidospora	FINRISK	5959	1127096	0.1179	0.0725	1.62621	no
Herbinix	FINRISK	5959	1127096	0.0079	0.0792	0.0997475	no
Holdemania massiliensis	FINRISK	5959	1127096	-0.0419	0.0724	-0.578729	no
Holdemania sp900120005	FINRISK	5959	1127096	0.3115	0.109	2.8578	yes
Holdemania	FINRISK	5959	1127096	0.3035	0.0982	3.09063	yes
Hungatella sp900155545	FINRISK	5959	1127096	-0.0015	0.0841	-0.0178359	no
Hydrogenophaga	FINRISK	5959	1127096	-0.0763	0.0726	-1.05096	no
Hyphomonas	FINRISK	5959	1127096	-0.0255	0.0707	-0.360679	no
Intestinimonas massiliensis	FINRISK	5959	1127096	0.1271	0.0846	1.50236	no
Jiangellaceae	FINRISK	5959	1127096	0.08	0.071	1.12676	no
Johnsonella ignava	FINRISK	5959	1127096	0.0736	0.0791	0.930468	no
K10 sp001941205	FINRISK	5959	1127096	0.0428	0.0767	0.558018	no
K10	FINRISK	5959	1127096	0.0902	0.0718	1.25627	no
Kandleria vitulina	FINRISK	5959	1127096	-0.1134	0.0723	-1.56846	no
Kineothrix	FINRISK	5959	1127096	-0.039	0.0707	-0.551627	no
KLE1615 sp900066985	FINRISK	5959	1127096	0.0983	0.0824	1.19296	no
KLE1615	FINRISK	5959	1127096	0.1039	0.0814	1.27641	no
Klebsiella A	FINRISK	5959	1127096	-0.0699	0.0733	-0.953615	no
Klebsiella pneumoniae	FINRISK	5959	1127096	0.0447	0.0704	0.634943	no
Klebsiella	FINRISK	5959	1127096	0.0252	0.0738	0.341463	no
koll11	FINRISK	5959	1127096	0.1744	0.0783	2.22733	yes
Lachnoanaerobaculum saburreum	FINRISK	5959	1127096	-0.0067	0.0843	-0.0794781	no
Lachnospiraceae	FINRISK	5959	1127096	0.0929	0.0976	0.951844	no
Lachnospirales	FINRISK	5959	1127096	0.1041	0.099	1.05152	no
Lachnospira rogosae	FINRISK	5959	1127096	-0.0371	0.0965	-0.384456	no
Lachnospira sp000437735	FINRISK	5959	1127096	-0.0368	0.0814	-0.452088	no
Lactobacillus B ruminis	FINRISK	5959	1127096	0.0362	0.0756	0.478836	no
Lactobacillus B salivarius	FINRISK	5959	1127096	-0.0386	0.0857	-0.450408	no
Lactobacillus B	FINRISK	5959	1127096	0.001	0.0788	0.0126904	no
Lactococcus lactis	FINRISK	5959	1127096	0.0286	0.0806	0.354839	no
Lawsonibacter sp000492175	FINRISK	5959	1127096	0.0116	0.0804	0.144279	no
Lawsonibacter sp002161175	FINRISK	5959	1127096	0.1344	0.0756	1.77778	yes
Lawsonibacter sp900066645	FINRISK	5959	1127096	0.0664	0.0768	0.864583	no
Leclercia	FINRISK	5959	1127096	-0.0211	0.0786	-0.268448	no
Lentimicrobiaceae	FINRISK	5959	1127096	-0.0758	0.078	-0.971795	no
Leptospirae	FINRISK	5959	1127096	-0.07	0.0818	-0.855746	no
Leptospirales	FINRISK	5959	1127096	-0.0547	0.0825	-0.66303	no
Leuconostoc mesenteroides	FINRISK	5959	1127096	0.0375	0.0884	0.424208	no
Leuconostoc	FINRISK	5959	1127096	0.0189	0.0831	0.227437	no
Magnetospirillum A	FINRISK	5959	1127096	-0.0571	0.0827	-0.690447	no
Marinilabiliaceae	FINRISK	5959	1127096	-0.1054	0.0728	-1.4478	no
Massiliomicrobiota sp002160815	FINRISK	5959	1127096	0.1445	0.0791	1.8268	yes
Massiliomicrobiota	FINRISK	5959	1127096	0.1569	0.0812	1.93227	yes
Megamonas funiformis	FINRISK	5959	1127096	0.1169	0.0748	1.56283	no
Megamonas	FINRISK	5959	1127096	0.093	0.0732	1.27049	no
Megasphaera elsdenii	FINRISK	5959	1127096	0.038	0.084	0.452381	no
Megasphaera	FINRISK	5959	1127096	0.0717	0.0802	0.894015	no
Merdibacter massiliensis	FINRISK	5959	1127096	0.2104	0.0771	2.72892	yes
Methanobacterium B	FINRISK	5959	1127096	0.0614	0.0718	0.855153	no
Methanobrevibacter B	FINRISK	5959	1127096	-0.0262	0.0696	-0.376437	no
Microvirga	FINRISK	5959	1127096	0.1976	0.0797	2.4793	yes
Monoglobaceae	FINRISK	5959	1127096	-0.0564	0.0724	-0.779006	no
Monoglobus pectinilyticus	FINRISK	5959	1127096	-0.041	0.0726	-0.564738	no
Monoglobus	FINRISK	5959	1127096	-0.0557	0.0713	-0.781206	no
Morganella	FINRISK	5959	1127096	-0.0578	0.0782	-0.73913	no
Mycobacteriaceae	FINRISK	5959	1127096	-0.0645	0.0767	-0.840939	no
Mycoplasmataceae	FINRISK	5959	1127096	-0.0064	0.0799	-0.0801001	no
Mycoplasmatales	FINRISK	5959	1127096	-0.0478	0.075	-0.637333	no
Mycoplasmoidaceae	FINRISK	5959	1127096	-0.0724	0.072	-1.00556	no
Negativibacillus massiliensis	FINRISK	5959	1127096	0.1204	0.0797	1.51066	no
Negativibacillus sp000435195	FINRISK	5959	1127096	0.229	0.0946	2.42072	yes
Negativibacillus	FINRISK	5959	1127096	0.2952	0.1085	2.72074	yes
NK4A144	FINRISK	5959	1127096	-0.0089	0.0679	-0.131075	no
Odoribacter laneus	FINRISK	5959	1127096	-0.0485	0.0752	-0.644947	no
Olsenella C	FINRISK	5959	1127096	-0.0014	0.0714	-0.0196078	no
Omnitrophota	FINRISK	5959	1127096	0.0782	0.0823	0.950182	no
Paceibacteria	FINRISK	5959	1127096	0.0016	0.0762	0.0209974	no
Paenibacillales	FINRISK	5959	1127096	0.0341	0.0817	0.417381	no
Paenibacillus J	FINRISK	5959	1127096	-0.0374	0.0684	-0.546784	no
Pandoraea	FINRISK	5959	1127096	-0.085	0.0786	-1.08142	no
Parabacteroides johnsonii	FINRISK	5959	1127096	0.0794	0.0924	0.859307	no
Parabacteroides sp000436495	FINRISK	5959	1127096	0.0108	0.0803	0.134496	no
Parabacteroides	FINRISK	5959	1127096	0.0845	0.0874	0.966819	no
Parachlamydiales	FINRISK	5959	1127096	0.0242	0.0711	0.340366	no
Paraglaciecola	FINRISK	5959	1127096	0.0089	0.0678	0.131268	no
Paramuribaculum sp001689565	FINRISK	5959	1127096	0.1004	0.0771	1.3022	no
Pararhizobium	FINRISK	5959	1127096	-0.0432	0.0809	-0.533993	no
Pauljensenia sp000411415	FINRISK	5959	1127096	-0.0427	0.0761	-0.561104	no
Peptococcia	FINRISK	5959	1127096	0.0316	0.0806	0.39206	no
Phascolarctobacterium sp003150755	FINRISK	5959	1127096	-0.0671	0.0758	-0.885224	no
Phocea massiliensis	FINRISK	5959	1127096	0.1427	0.0967	1.4757	no
Photobacterium	FINRISK	5959	1127096	0.1022	0.0696	1.46839	no
Planococcaceae	FINRISK	5959	1127096	-0.0119	0.0736	-0.161685	no
Poseidoniaceae	FINRISK	5959	1127096	-0.0676	0.085	-0.795294	no
Prevotella bivia	FINRISK	5959	1127096	-0.0704	0.0822	-0.856448	no
Prevotella buccae	FINRISK	5959	1127096	0.0473	0.0778	0.607969	no
Prevotellamassilia sp000437675	FINRISK	5959	1127096	0.1477	0.0761	1.94087	yes
Prevotellamassilia	FINRISK	5959	1127096	0.1725	0.0808	2.1349	yes
Prevotella sp000434975	FINRISK	5959	1127096	0.1035	0.0851	1.21622	no
Prevotella sp000436915	FINRISK	5959	1127096	0.0603	0.0878	0.686788	no
Prevotella sp002437285	FINRISK	5959	1127096	0.1298	0.0768	1.6901	yes
Prevotella sp002437565	FINRISK	5959	1127096	0.1103	0.0779	1.41592	no
Prevotella sp002933775	FINRISK	5959	1127096	0.0009	0.0848	0.0106132	no
Prevotella sp900317685	FINRISK	5959	1127096	0.1304	0.0734	1.77657	yes
Prevotella sp900318625	FINRISK	5959	1127096	0.0759	0.0753	1.00797	no
Propionibacterium freudenreichii	FINRISK	5959	1127096	0.021	0.0773	0.271669	no
Proteus	FINRISK	5959	1127096	-0.0332	0.0756	-0.439153	no
Provencibacterium massiliense	FINRISK	5959	1127096	0.1197	0.1038	1.15318	no
Provencibacterium	FINRISK	5959	1127096	0.1092	0.1053	1.03704	no
Providencia	FINRISK	5959	1127096	-0.1477	0.078	-1.89359	no
Pseudomonadales	FINRISK	5959	1127096	0.0098	0.0788	0.124365	no
Pseudomonas aeruginosa	FINRISK	5959	1127096	0.0162	0.0799	0.202753	no
Psychroserpens	FINRISK	5959	1127096	0.0696	0.0783	0.888889	no
QALR01 sp003150035	FINRISK	5959	1127096	0.0696	0.0779	0.893453	no
Raoultella	FINRISK	5959	1127096	0.1177	0.0825	1.42667	no
RC9 sp900317925	FINRISK	5959	1127096	-0.0361	0.0723	-0.499308	no
Rhodanobacter	FINRISK	5959	1127096	0.1558	0.0828	1.88164	yes
Rhodococcus	FINRISK	5959	1127096	0.0372	0.0785	0.473885	no
Rhodovulum	FINRISK	5959	1127096	-0.0377	0.0717	-0.525802	no
Romboutsia ilealis	FINRISK	5959	1127096	0.0659	0.0789	0.835234	no
Roseibacillus	FINRISK	5959	1127096	0.1424	0.0745	1.91141	yes
Rubneribacter sp002159915	FINRISK	5959	1127096	0.1707	0.0763	2.23722	yes
RUG013 sp001486445	FINRISK	5959	1127096	-0.0484	0.0765	-0.63268	no
RUG147 sp900315495	FINRISK	5959	1127096	-0.0328	0.0687	-0.477438	no
RUG147	FINRISK	5959	1127096	-0.0342	0.0706	-0.484419	no
RUG420 sp900317985	FINRISK	5959	1127096	0.0325	0.075	0.433333	no
RUG472 sp900319345	FINRISK	5959	1127096	0.0991	0.0854	1.16042	no
RUG472	FINRISK	5959	1127096	0.0674	0.0797	0.845671	no
Ruminococcus A sp000432335	FINRISK	5959	1127096	0.0637	0.0813	0.783518	no
Ruminococcus C sp000437255	FINRISK	5959	1127096	0.0353	0.0767	0.460235	no
Ruminococcus D bicirculans	FINRISK	5959	1127096	0.032	0.0778	0.411311	no
Ruminococcus D	FINRISK	5959	1127096	0.0815	0.0775	1.05161	no
Ruminococcus E sp003521625	FINRISK	5959	1127096	-0.1324	0.0784	-1.68878	no
Ruminococcus E sp900100595	FINRISK	5959	1127096	0.1235	0.0965	1.27979	no
Ruminococcus E sp900314705	FINRISK	5959	1127096	-0.0495	0.0724	-0.683702	no
Ruminococcus	FINRISK	5959	1127096	0.0106	0.0841	0.12604	no
Saccharofermentanaceae	FINRISK	5959	1127096	0.0864	0.0771	1.12062	no
Saccharomonospora	FINRISK	5959	1127096	-0.0891	0.0768	-1.16016	no
SAR324	FINRISK	5959	1127096	-0.0711	0.0666	-1.06757	no
SM23-33	FINRISK	5959	1127096	0.0601	0.0856	0.702103	no
Sorangium	FINRISK	5959	1127096	-0.058	0.0694	-0.835735	no
Spirillospora	FINRISK	5959	1127096	0.0117	0.0762	0.153543	no
Spirochaetia	FINRISK	5959	1127096	-0.0603	0.0721	-0.836338	no
Sporomusales	FINRISK	5959	1127096	0.1126	0.0819	1.37485	no
Staphylococcus A fleurettii	FINRISK	5959	1127096	0.0406	0.087	0.466667	no
Staphylococcus aureus	FINRISK	5959	1127096	0.0854	0.0768	1.11198	no
Stappia	FINRISK	5959	1127096	0.0894	0.0722	1.23823	no
Streptacidiphilus	FINRISK	5959	1127096	-0.0383	0.0761	-0.503285	no
Streptococcus sanguinis	FINRISK	5959	1127096	0.0967	0.0784	1.23342	no
Succiniclasticum	FINRISK	5959	1127096	0.1579	0.0768	2.05599	yes
Succinivibrionaceae	FINRISK	5959	1127096	0.0201	0.0788	0.255076	no
Succinivibrio	FINRISK	5959	1127096	0.0046	0.0835	0.0550898	no
Syntrophomonadia	FINRISK	5959	1127096	-0.066	0.077	-0.857143	no
Syntrophorhabdaceae	FINRISK	5959	1127096	0.0225	0.0788	0.285533	no
Syntrophorhabdia	FINRISK	5959	1127096	0.0725	0.0762	0.951444	no
Tannerellaceae	FINRISK	5959	1127096	0.0585	0.0862	0.678654	no
Tepidanaerobacteraceae	FINRISK	5959	1127096	0.0447	0.0752	0.594415	no
Terrisporobacter othiniensis	FINRISK	5959	1127096	-0.0071	0.0882	-0.0804989	no
Terrisporobacter	FINRISK	5959	1127096	-0.0131	0.0919	-0.142546	no
Thermococcaceae	FINRISK	5959	1127096	-0.0587	0.0696	-0.843391	no
Thermococci	FINRISK	5959	1127096	0.007	0.0646	0.108359	no
Thermoplasmatota	FINRISK	5959	1127096	0.0656	0.0806	0.813896	no
Thermoprotei	FINRISK	5959	1127096	0.0752	0.0779	0.96534	no
Thioalkalivibrionaceae	FINRISK	5959	1127096	-0.0092	0.079	-0.116456	no
TMED109	FINRISK	5959	1127096	-0.016	0.0789	-0.202788	no
Treponema D	FINRISK	5959	1127096	0.081	0.0779	1.03979	no
Treponemataceae	FINRISK	5959	1127096	0.0461	0.0809	0.569839	no
Turicibacteraceae	FINRISK	5959	1127096	0.1906	0.1026	1.8577	yes
Turicibacter sp001543345	FINRISK	5959	1127096	0.121	0.1054	1.14801	no
Turicibacter	FINRISK	5959	1127096	0.1893	0.0994	1.90443	yes
UBA1033 sp001695555	FINRISK	5959	1127096	-0.0424	0.0733	-0.578445	no
UBA1066 sp900317515	FINRISK	5959	1127096	-0.1282	0.0855	-1.49942	no
UBA1066	FINRISK	5959	1127096	0.0497	0.0721	0.68932	no
UBA11471 sp000434215	FINRISK	5959	1127096	-0.0442	0.0748	-0.590909	no
UBA11471	FINRISK	5959	1127096	-0.0521	0.075	-0.694667	no
UBA1191	FINRISK	5959	1127096	0.0213	0.0783	0.272031	no
UBA11963 sp002362595	FINRISK	5959	1127096	0.0617	0.0754	0.818302	no
UBA11963	FINRISK	5959	1127096	0.0567	0.0767	0.739244	no
UBA1206 sp000433115	FINRISK	5959	1127096	0.0431	0.1189	0.362489	no
UBA1375 sp002305795	FINRISK	5959	1127096	0.1669	0.0722	2.31163	yes
UBA1407	FINRISK	5959	1127096	-0.0512	0.0705	-0.726241	no
UBA1409	FINRISK	5959	1127096	0.0876	0.0868	1.00922	no
UBA1417 sp003531055	FINRISK	5959	1127096	0.0899	0.0937	0.959445	no
UBA1446 sp002329245	FINRISK	5959	1127096	0.1096	0.073	1.50137	no
UBA1448 sp002329405	FINRISK	5959	1127096	0.0171	0.0859	0.199069	no
UBA1448	FINRISK	5959	1127096	0.0036	0.0838	0.0429594	no
UBA1611	FINRISK	5959	1127096	-0.096	0.0649	-1.4792	no
UBA1777 sp002320035	FINRISK	5959	1127096	0.0993	0.0742	1.33827	no
UBA1777 sp900316255	FINRISK	5959	1127096	0.0422	0.082	0.514634	no
UBA1777 sp900319275	FINRISK	5959	1127096	-0.008	0.0899	-0.0889878	no
UBA1777 sp900319835	FINRISK	5959	1127096	0.0517	0.0715	0.723077	no
UBA2658 sp002841545	FINRISK	5959	1127096	0.0017	0.0788	0.0215736	no
UBA2821	FINRISK	5959	1127096	0.1109	0.0867	1.27912	no
UBA2922 sp900313925	FINRISK	5959	1127096	0.0218	0.0701	0.310984	no
UBA3282 sp002493835	FINRISK	5959	1127096	-0.061	0.0773	-0.789133	no
UBA3792	FINRISK	5959	1127096	-0.035	0.085	-0.411765	no
UBA3855 sp900316885	FINRISK	5959	1127096	0.1007	0.1202	0.83777	no
UBA5394 sp002409725	FINRISK	5959	1127096	0.1634	0.0892	1.83184	yes
UBA6382	FINRISK	5959	1127096	-0.0416	0.0818	-0.508557	no
UBA6398 sp002451695	FINRISK	5959	1127096	0.0455	0.0745	0.610738	no
UBA6398	FINRISK	5959	1127096	-0.0025	0.0752	-0.0332447	no
UBA644	FINRISK	5959	1127096	0.119	0.118	1.00847	no
UBA6960	FINRISK	5959	1127096	-0.0574	0.0767	-0.74837	no
UBA7102 sp002315655	FINRISK	5959	1127096	0.014	0.0797	0.175659	no
UBA7177 sp002491225	FINRISK	5959	1127096	0.1471	0.079	1.86203	yes
UBA7177	FINRISK	5959	1127096	0.1138	0.0789	1.44233	no
UBA7182 sp002491115	FINRISK	5959	1127096	0.0747	0.0961	0.777315	no
UBA7182	FINRISK	5959	1127096	0.1599	0.0826	1.93584	yes
UBA737 sp002451855	FINRISK	5959	1127096	0.0155	0.0787	0.19695	no
UBA737	FINRISK	5959	1127096	0.13	0.0864	1.50463	no
UBA7703	FINRISK	5959	1127096	0.0554	0.0813	0.681427	no
UBA7748 sp900314535	FINRISK	5959	1127096	-0.0261	0.0768	-0.339844	no
UBA8517	FINRISK	5959	1127096	-0.0184	0.0704	-0.261364	no
UBA8621	FINRISK	5959	1127096	-0.0517	0.0736	-0.702446	no
UBA8904	FINRISK	5959	1127096	0.0409	0.0819	0.499389	no
UBA9475 sp002161235	FINRISK	5959	1127096	0.073	0.0745	0.979866	no
UBA9475 sp002161675	FINRISK	5959	1127096	0.1757	0.0797	2.20452	yes
UBP9	FINRISK	5959	1127096	-0.1093	0.0812	-1.34606	no
UCG-010 sp003150215	FINRISK	5959	1127096	0.1138	0.0792	1.43687	no
UNC496MF	FINRISK	5959	1127096	0.0539	0.0839	0.642431	no
V9D3004	FINRISK	5959	1127096	0.0843	0.072	1.17083	no
Veillonellaceae	FINRISK	5959	1127096	0.0675	0.0839	0.804529	no
Veillonella rogosae	FINRISK	5959	1127096	0.1011	0.1473	0.686354	no
Veillonella	FINRISK	5959	1127096	0.0701	0.0846	0.828605	no
Victivallis sp002998355	FINRISK	5959	1127096	0.0929	0.0775	1.19871	no
C_Actinobacteria abundance	German	8956	1077659	-0.0059	0.0452	-0.130531	no
C_Alphaproteobacteria abundance	German	8956	1074915	-0.0665	0.0462	-1.43939	no
C_Bacteroidia abundance	German	8956	1081421	0.0248	0.0456	0.54386	no
C_Betaproteobacteria abundance	German	8956	1081785	-0.0262	0.054	-0.485185	no
C_Clostridia abundance	German	8956	1081421	0.0264	0.0537	0.49162	no
C_Erysipelotrichia abundance	German	8956	1081720	-0.0197	0.0485	-0.406186	no
C_Gammaproteobacteria abundance	German	8956	1082012	-0.0148	0.0469	-0.315565	no
C_Negativicutes abundance	German	8956	1082337	0.0505	0.0505	1	no
F_Acidaminococcaceae abundance	German	8956	1084716	0.0751	0.0508	1.47835	no
F_Bacteroidaceae abundance	German	8956	1081427	0.0463	0.0537	0.862197	no
F_Coriobacteriaceae abundance	German	8956	1077625	-0.0084	0.0453	-0.18543	no
F_Erysipelotrichaceae abundance	German	8956	1081720	-0.0197	0.0485	-0.406186	no
F_Lachnospiraceae abundance	German	8956	1081346	0.0284	0.053	0.535849	no
F_Porphyromonadaceae abundance	German	8956	1081420	-0.0857	0.0445	-1.92584	no
F_Prevotellaceae abundance	German	8956	1083796	-0.039	0.0484	-0.805785	no
F_Rikenellaceae abundance	German	8956	1081676	0.0517	0.0529	0.977316	no
F_Ruminococcaceae abundance	German	8956	1081282	-0.0208	0.0486	-0.427984	no
F_Sutterellaceae abundance	German	8956	1081963	-0.0086	0.0542	-0.158672	no
G_Alistipes abundance	German	8956	1081604	0.0411	0.0509	0.807466	no
G_Alloprevotella abundance	German	8956	1094359	0.0016	0.0506	0.0316206	no
G_Alphaproteobacteria abundance	German	8956	1075098	-0.0496	0.0478	-1.03766	no
G_Bacteroidales abundance	German	8956	1086476	0.0078	0.0478	0.16318	no
G_Bacteroides abundance	German	8956	1081427	0.0463	0.0537	0.862197	no
G_Bacteroidetes abundance	German	8956	1084262	-0.0399	0.0496	-0.804435	no
G_Barnesiella abundance	German	8956	1083000	-0.0077	0.0503	-0.153082	no
G_Catenibacterium abundance	German	8956	1080987	0.0379	0.0492	0.770325	no
G_Clostridiales abundance	German	8956	1082073	0.0448	0.0509	0.880157	no
G_Clostridium_XlVa abundance	German	8956	1072803	-0.0021	0.0463	-0.0453564	no
G_Coprococcus abundance	German	8956	1072966	0.001	0.0458	0.0218341	no
G_Faecalibacterium abundance	German	8956	1081683	-0.0191	0.0511	-0.373777	no
G_Firmicutes abundance	German	8956	1072755	-0.004	0.0515	-0.0776699	no
G_Holdemanella abundance	German	8956	1080706	0.0578	0.0487	1.18686	no
G_Lachnospiraceae abundance	German	8956	1081426	0.0273	0.0542	0.50369	no
G_Oscillibacter abundance	German	8956	1081678	0.0044	0.0543	0.0810313	no
G_Parabacteroides abundance	German	8956	1082065	-0.0351	0.0486	-0.722222	no
G_Paraprevotella abundance	German	8956	1087884	-0.0496	0.0476	-1.04202	no
G_Parasutterella abundance	German	8956	1078729	-0.0705	0.0513	-1.37427	no
G_Phascolarctobacterium abundance	German	8956	1085664	0.0644	0.0505	1.27525	no
G_Porphyromonadaceae abundance	German	8956	1086623	0.0379	0.0493	0.768763	no
G_Prevotella abundance	German	8956	1084276	-0.0416	0.0483	-0.861284	no
G_Prevotellaceae abundance	German	8956	1092319	-0.0125	0.0557	-0.224417	no
G_Roseburia abundance	German	8956	1081592	0.0681	0.0487	1.39836	no
G_Ruminococcaceae abundance	German	8956	1081385	-0.0214	0.0491	-0.435845	no
G_Ruminococcus abundance	German	8956	1082000	0.0446	0.0517	0.862669	no
G_Ruminococcus2 abundance	German	8956	1072655	0.0743	0.054	1.37593	no
G_Subdoligranulum abundance	German	8956	1081828	-0.0665	0.0488	-1.3627	no
G_Sutterella abundance	German	8956	1080665	-0.0156	0.0473	-0.32981	no
O_Bacteroidales abundance	German	8956	1081421	0.0248	0.0456	0.54386	no
O_Burkholderiales abundance	German	8956	1082044	-0.0328	0.0542	-0.605166	no
O_Clostridiales abundance	German	8956	1081421	0.0171	0.0531	0.322034	no
O_Coriobacteriales abundance	German	8956	1077625	-0.0084	0.0453	-0.18543	no
O_Erysipelotrichales abundance	German	8956	1081720	-0.0197	0.0485	-0.406186	no
O_Selenomonadales abundance	German	8956	1082337	0.0505	0.0505	1	no
OTU97_1 (Bacteroides) abundance	German	8956	1082319	0.1184	0.0573	2.06632	yes
OTU97_100 (Ruminococcaceae) abundance	German	8956	1079132	0.0126	0.0544	0.231618	no
OTU97_101 (Sutterella) abundance	German	8956	1082046	0.1131	0.0542	2.08672	yes
OTU97_102 (Prevotella) abundance	German	8956	1094459	0.024	0.0569	0.421793	no
OTU97_105 (Ruminococcaceae) abundance	German	8956	1078743	0.0502	0.0518	0.969112	no
OTU97_106 (Ruminococcaceae) abundance	German	8956	1089212	-0.0391	0.0514	-0.7607	no
OTU97_108 (Phascolarctobacterium) abundance	German	8956	1092882	0.0273	0.0488	0.559426	no
OTU97_109 (Paraprevotella) abundance	German	8956	1091607	-0.0504	0.057	-0.884211	no
OTU97_11 (Parabacteroides) abundance	German	8956	1084401	0.0327	0.0478	0.6841	no
OTU97_113 (Bacteroidales) abundance	German	8956	1093078	-0.0077	0.0495	-0.155556	no
OTU97_117 (Ruminococcus) abundance	German	8956	1084020	-0.0693	0.0453	-1.5298	no
OTU97_119 (Desulfovibrio) abundance	German	8956	1094553	-0.0058	0.0488	-0.118852	no
OTU97_12 (Bacteroides) abundance	German	8956	1090735	0.0115	0.0503	0.228628	no
OTU97_126 (Prevotella) abundance	German	8956	1079319	-0.0752	0.0466	-1.61373	no
OTU97_13 (Subdoligranulum) abundance	German	8956	1080417	-0.024	0.0573	-0.418848	no
OTU97_130 (Butyrivibrio) abundance	German	8956	1079813	-0.0392	0.0522	-0.750958	no
OTU97_137 (Catenibacterium) abundance	German	8956	1080776	0.0425	0.0484	0.878099	no
OTU97_138 (Oscillibacter) abundance	German	8956	1084459	0.0188	0.0472	0.398305	no
OTU97_140 (Bacteroides) abundance	German	8956	1087975	0.0262	0.0516	0.507752	no
OTU97_15 (Parasutterella) abundance	German	8956	1073595	0.0114	0.053	0.215094	no
OTU97_150 (Bacteroides) abundance	German	8956	1080278	-0.0574	0.0503	-1.14115	no
OTU97_16 (Faecalibacterium) abundance	German	8956	1082388	0.0775	0.0514	1.50778	no
OTU97_163 (Bacteroides) abundance	German	8956	1092816	0.0483	0.0538	0.89777	no
OTU97_165 (Porphyromonadaceae) abundance	German	8956	1094578	0.0413	0.0539	0.766234	no
OTU97_17 (Parabacteroides) abundance	German	8956	1082840	0.0581	0.0516	1.12597	no
OTU97_173 (Bacteroides) abundance	German	8956	1080551	-0.004	0.0517	-0.0773694	no
OTU97_19 (Bacteria) abundance	German	8956	1060400	0.0188	0.0478	0.393305	no
OTU97_2 (Bacteroides) abundance	German	8956	1082970	-0.0024	0.0547	-0.0438757	no
OTU97_21 (Parasutterella) abundance	German	8956	1076535	0.0221	0.0506	0.436759	no
OTU97_23 (Faecalibacterium) abundance	German	8956	1081674	-0.0049	0.0514	-0.0953307	no
OTU97_235 (Phascolarctobacterium) abundance	German	8956	1090068	-0.031	0.0546	-0.567766	no
OTU97_24 (Prevotella) abundance	German	8956	1078303	-0.013	0.053	-0.245283	no
OTU97_257 (Mitsuokella) abundance	German	8956	1082157	0.0005	0.0549	0.00910747	no
OTU97_26 (Parasutterella) abundance	German	8956	1077373	-0.0498	0.0547	-0.91042	no
OTU97_27 (Bacteroides) abundance	German	8956	1079853	-0.0106	0.0517	-0.205029	no
OTU97_277 (Prevotella) abundance	German	8956	1092876	0.0556	0.0513	1.08382	no
OTU97_3 (Bacteroides) abundance	German	8956	1081938	0.0415	0.0569	0.72935	no
OTU97_30 (Roseburia) abundance	German	8956	1072937	-0.001	0.0454	-0.0220264	no
OTU97_31 (Prevotella) abundance	German	8956	1088850	-0.0605	0.0487	-1.2423	no
OTU97_33 (Holdemanella) abundance	German	8956	1080608	0.0596	0.0482	1.23651	no
OTU97_34 (Ruminococcus) abundance	German	8956	1075319	0.0451	0.0502	0.898406	no
OTU97_354 (Alloprevotella) abundance	German	8956	1079969	-0.1038	0.0473	-2.1945	no
OTU97_38 (Alphaproteobacteria) abundance	German	8956	1078164	-0.0567	0.0517	-1.09671	no
OTU97_39 (Proteobacteria) abundance	German	8956	1080777	0.0247	0.0501	0.493014	no
OTU97_4 (Alistipes) abundance	German	8956	1083134	0.0515	0.0463	1.11231	no
OTU97_46 (Lachnospiraceae) abundance	German	8956	1084246	-0.0447	0.0455	-0.982418	no
OTU97_5 (Sutterella) abundance	German	8956	1075148	-0.0878	0.0483	-1.81781	no
OTU97_50 (Aestuariispira) abundance	German	8956	1079319	0.0264	0.0482	0.547718	no
OTU97_51 (Barnesiella) abundance	German	8956	1082954	0.0145	0.0513	0.282651	no
OTU97_53 (Bacteroides) abundance	German	8956	1089892	-0.0148	0.0502	-0.294821	no
OTU97_56 (Ruminococcaceae) abundance	German	8956	1088159	0.0705	0.0525	1.34286	no
OTU97_58 (Sutterellaceae) abundance	German	8956	1079171	-0.07	0.0464	-1.50862	no
OTU97_6 (Sutterella) abundance	German	8956	1085600	-0.0137	0.0525	-0.260952	no
OTU97_65 (Parabacteroides) abundance	German	8956	1087915	0.1007	0.0528	1.9072	yes
OTU97_69 (Clostridiales) abundance	German	8956	1078855	-0.0401	0.0517	-0.775629	no
OTU97_7 (Lachnospiraceae) abundance	German	8956	1078606	0.019	0.0436	0.43578	no
OTU97_73 (Prevotella) abundance	German	8956	1076873	-0.0356	0.051	-0.698039	no
OTU97_74 (Alistipes) abundance	German	8956	1079517	-0.0297	0.049	-0.606122	no
OTU97_8 (Ruminococcaceae) abundance	German	8956	1073487	-0.0393	0.0496	-0.792339	no
OTU97_80 (Ruminococcus) abundance	German	8956	1091616	-0.1156	0.0466	-2.48069	no
OTU97_82 (Bacteroides) abundance	German	8956	1058878	0.0333	0.0501	0.664671	no
OTU97_86 (Phascolarctobacterium) abundance	German	8956	1078545	0.0779	0.0508	1.53346	no
OTU97_9 (Alistipes) abundance	German	8956	1082897	0.0772	0.0514	1.50195	no
OTU97_95 (Cytophagales) abundance	German	8956	1079430	0.0408	0.0525	0.777143	no
OTU97_97 (Clostridiales) abundance	German	8956	1086329	0.0012	0.0556	0.0215827	no
OTU99_1 (Bacteroides) abundance	German	8956	1082341	0.1183	0.0568	2.08275	yes
OTU99_106 (Barnesiella) abundance	German	8956	1084351	0.0026	0.0489	0.0531697	no
OTU99_108 (Cytophagales) abundance	German	8956	1079311	0.0291	0.0521	0.558541	no
OTU99_11 (Parabacteroides) abundance	German	8956	1085423	0.0283	0.0489	0.578732	no
OTU99_110 (Clostridiales) abundance	German	8956	1086585	0.0039	0.0535	0.0728972	no
OTU99_116 (Sutterella) abundance	German	8956	1082418	0.1142	0.0535	2.13458	yes
OTU99_12 (Bacteroides) abundance	German	8956	1090735	0.0115	0.0503	0.228628	no
OTU99_120 (Ruminococcaceae) abundance	German	8956	1078692	0.0305	0.0513	0.594542	no
OTU99_121 (Ruminococcaceae) abundance	German	8956	1089071	-0.0372	0.0511	-0.727984	no
OTU99_123 (Phascolarctobacterium) abundance	German	8956	1092415	0.0285	0.0493	0.578093	no
OTU99_124 (Paraprevotella) abundance	German	8956	1092665	-0.0535	0.058	-0.922414	no
OTU99_13 (Subdoligranulum) abundance	German	8956	1080370	-0.0298	0.0565	-0.527434	no
OTU99_132 (Bacteroidales) abundance	German	8956	1095484	0.0416	0.0492	0.845528	no
OTU99_137 (Ruminococcus) abundance	German	8956	1084020	-0.0693	0.0453	-1.5298	no
OTU99_140 (Desulfovibrio) abundance	German	8956	1094031	-0.0151	0.0503	-0.300199	no
OTU99_150 (Prevotella) abundance	German	8956	1078443	-0.0773	0.0464	-1.66595	no
OTU99_155 (Butyrivibrio) abundance	German	8956	1079636	-0.0205	0.0544	-0.376838	no
OTU99_157 (Barnesiella) abundance	German	8956	1094036	0.0239	0.047	0.508511	no
OTU99_16 (Faecalibacterium) abundance	German	8956	1082908	0.0902	0.0495	1.82222	yes
OTU99_166 (Prevotella) abundance	German	8956	1086201	-0.0088	0.052	-0.169231	no
OTU99_17 (Parabacteroides) abundance	German	8956	1079394	0.0315	0.0495	0.636364	no
OTU99_171 (Bacteroides) abundance	German	8956	1087192	0.029	0.0509	0.569745	no
OTU99_19 (Bacteria) abundance	German	8956	1060400	0.0188	0.0478	0.393305	no
OTU99_197 (Bacteroides) abundance	German	8956	1081423	0.0139	0.0548	0.25365	no
OTU99_2 (Bacteroides) abundance	German	8956	1082970	-0.0024	0.0547	-0.0438757	no
OTU99_21 (Parasutterella) abundance	German	8956	1078569	-0.019	0.0536	-0.354478	no
OTU99_211 (Bacteroides) abundance	German	8956	1081803	-0.0299	0.0505	-0.592079	no
OTU99_23 (Faecalibacterium) abundance	German	8956	1082285	-0.0425	0.056	-0.758929	no
OTU99_24 (Prevotella) abundance	German	8956	1078013	-0.016	0.0501	-0.319361	no
OTU99_26 (Parasutterella) abundance	German	8956	1077373	-0.0497	0.0549	-0.905282	no
OTU99_271 (Prevotella) abundance	German	8956	1080320	-0.0271	0.0522	-0.519157	no
OTU99_298 (Phascolarctobacterium) abundance	German	8956	1090068	-0.0312	0.0542	-0.575646	no
OTU99_3 (Bacteroides) abundance	German	8956	1081938	0.039	0.0568	0.68662	no
OTU99_30 (Parasutterella) abundance	German	8956	1081846	-0.002	0.0536	-0.0373134	no
OTU99_32 (Prevotella) abundance	German	8956	1089582	0.0139	0.0518	0.26834	no
OTU99_34 (Holdemanella) abundance	German	8956	1085829	0.0106	0.0478	0.221757	no
OTU99_35 (Ruminococcus) abundance	German	8956	1075741	0.0294	0.0508	0.57874	no
OTU99_39 (Alphaproteobacteria) abundance	German	8956	1078179	-0.0492	0.0512	-0.960938	no
OTU99_4 (Alistipes) abundance	German	8956	1083568	0.0276	0.0465	0.593548	no
OTU99_40 (Proteobacteria) abundance	German	8956	1081411	0.0231	0.0499	0.462926	no
OTU99_45 (Faecalibacterium) abundance	German	8956	1083227	0.0339	0.0504	0.672619	no
OTU99_47 (Prevotella) abundance	German	8956	1093087	-0.0973	0.0503	-1.93439	no
OTU99_5 (Sutterella) abundance	German	8956	1075148	-0.0877	0.0483	-1.81573	no
OTU99_53 (Aestuariispira) abundance	German	8956	1079319	0.0264	0.0482	0.547718	no
OTU99_54 (Holdemanella) abundance	German	8956	1074858	-0.007	0.0485	-0.14433	no
OTU99_55 (Barnesiella) abundance	German	8956	1089195	-0.0449	0.0504	-0.890873	no
OTU99_558 (Bacteroidales) abundance	German	8956	1078550	-0.0354	0.0476	-0.743697	no
OTU99_58 (Bacteroides) abundance	German	8956	1084216	-0.0417	0.0474	-0.879747	no
OTU99_59 (Prevotella) abundance	German	8956	1078526	-0.0159	0.0534	-0.297753	no
OTU99_6 (Sutterella) abundance	German	8956	1085650	-0.0142	0.0506	-0.280632	no
OTU99_62 (Ruminococcaceae) abundance	German	8956	1087603	0.0936	0.0527	1.77609	yes
OTU99_65 (Sutterellaceae) abundance	German	8956	1079171	-0.0702	0.0464	-1.51293	no
OTU99_7 (Lachnospiraceae) abundance	German	8956	1078616	0.0191	0.0433	0.441109	no
OTU99_72 (Parabacteroides) abundance	German	8956	1089715	0.0969	0.0533	1.81801	yes
OTU99_78 (Clostridiales) abundance	German	8956	1079277	-0.0425	0.0516	-0.823643	no
OTU99_8 (Ruminococcaceae) abundance	German	8956	1073455	-0.0438	0.0501	-0.874251	no
OTU99_84 (Prevotella) abundance	German	8956	1077964	-0.0597	0.0521	-1.14587	no
OTU99_85 (Alistipes) abundance	German	8956	1080607	0.0757	0.0518	1.46139	no
OTU99_9 (Alistipes) abundance	German	8956	1082886	0.0695	0.0515	1.34951	no
OTU99_92 (Ruminococcus) abundance	German	8956	1091989	-0.0497	0.0477	-1.04193	no
OTU99_94 (Bacteroides) abundance	German	8956	1061299	0.0411	0.0507	0.810651	no
OTU99_98 (Phascolarctobacterium) abundance	German	8956	1079045	0.0685	0.0492	1.39228	no
P_Actinobacteria abundance	German	8956	1077659	-0.0059	0.0452	-0.130531	no
P_Bacteroidetes abundance	German	8956	1081421	0.0283	0.0491	0.576375	no
P_Firmicutes abundance	German	8956	1081421	-0.0322	0.0537	-0.599628	no
P_Proteobacteria abundance	German	8956	1081657	0.0173	0.0483	0.358178	no
TestASV_1 (Bacteroides) abundance	German	8956	1082675	0.0825	0.0521	1.58349	no
TestASV_10 (Parabacteroides) abundance	German	8956	1085857	0.0185	0.0471	0.392781	no
TestASV_11 (Lachnospiraceae) abundance	German	8956	1073621	-0.0177	0.0496	-0.356855	no
TestASV_12 (Bacteroides) abundance	German	8956	1081821	-0.0155	0.0457	-0.339168	no
TestASV_13 (Bacteroides) abundance	German	8956	1091624	0.0092	0.05	0.184	no
TestASV_14 (Lachnospiraceae) abundance	German	8956	1073624	0.0699	0.0506	1.38142	no
TestASV_15 (Bacteroides) abundance	German	8956	1090864	-0.0787	0.0452	-1.74115	no
TestASV_16 (Bacteroides) abundance	German	8956	1094328	-0.0162	0.0553	-0.292948	no
TestASV_17 (Bacteroides) abundance	German	8956	1091999	0.0289	0.0541	0.534196	no
TestASV_18 (Prevotella) abundance	German	8956	1078822	-0.0679	0.0506	-1.3419	no
TestASV_19 (Prevotella) abundance	German	8956	1080441	0.0106	0.0567	0.186949	no
TestASV_2 (Bacteroides) abundance	German	8956	1082775	0.0136	0.0474	0.28692	no
TestASV_20 (Phascolarctobacterium) abundance	German	8956	1091512	-0.0282	0.044	-0.640909	no
TestASV_21 (Ruminococcaceae) abundance	German	8956	1075233	-0.0291	0.0496	-0.586694	no
TestASV_22 (Sutterella) abundance	German	8956	1085545	0.0136	0.0497	0.273642	no
TestASV_23 (Barnesiella) abundance	German	8956	1088339	0.0023	0.0501	0.0459082	no
TestASV_24 (Bacteroides) abundance	German	8956	1081582	-0.0276	0.0562	-0.491103	no
TestASV_25 (Sutterella) abundance	German	8956	1075198	-0.0696	0.0461	-1.50976	no
TestASV_26 (Phascolarctobacterium) abundance	German	8956	1078885	0.0527	0.0506	1.0415	no
TestASV_27 (Ruminococcaceae) abundance	German	8956	1077484	-0.0311	0.0524	-0.593511	no
TestASV_28 (Holdemanella) abundance	German	8956	1087474	-0.0515	0.0521	-0.988484	no
TestASV_29 (Barnesiella) abundance	German	8956	1080971	0.0037	0.0536	0.0690299	no
TestASV_3 (Bacteroides) abundance	German	8956	1084590	0.0051	0.0554	0.0920578	no
TestASV_30 (Paraprevotella) abundance	German	8956	1092142	-0.0513	0.0498	-1.03012	no
TestASV_31 (Ruminococcus) abundance	German	8956	1080910	0.008	0.0531	0.150659	no
TestASV_32 (Ruminococcaceae) abundance	German	8956	1080841	0.0406	0.0492	0.825203	no
TestASV_33 (Paraprevotella) abundance	German	8956	1080992	-0.0498	0.0513	-0.97076	no
TestASV_34 (Phascolarctobacterium) abundance	German	8956	1078446	0.1213	0.0563	2.15453	yes
TestASV_35 (Alphaproteobacteria) abundance	German	8956	1080396	-0.0299	0.0481	-0.621622	no
TestASV_36 (Aestuariispira) abundance	German	8956	1078860	0.0367	0.0483	0.759834	no
TestASV_37 (Ruminococcaceae) abundance	German	8956	1078650	-0.038	0.05	-0.76	no
TestASV_38 (Ruminococcus) abundance	German	8956	1082680	-0.0711	0.044	-1.61591	no
TestASV_39 (Bacteroides) abundance	German	8956	1082508	0.0011	0.0559	0.019678	no
TestASV_4 (Alistipes) abundance	German	8956	1083811	0.0274	0.0455	0.602198	no
TestASV_41 (Barnesiella) abundance	German	8956	1082699	0.1193	0.0564	2.11525	yes
TestASV_42 (Alphaproteobacteria) abundance	German	8956	1079741	0.0283	0.05	0.566	no
TestASV_43 (Parasutterella) abundance	German	8956	1078670	-0.0073	0.0528	-0.138258	no
TestASV_44 (Parasutterella) abundance	German	8956	1077999	-0.015	0.0552	-0.271739	no
TestASV_45 (Clostridiales) abundance	German	8956	1078545	-0.0535	0.052	-1.02885	no
TestASV_46 (Sutterella) abundance	German	8956	1082083	0.0415	0.0517	0.802708	no
TestASV_47 (Parasutterella) abundance	German	8956	1079162	-0.0607	0.0462	-1.31385	no
TestASV_48 (Sutterella) abundance	German	8956	1084432	0.0265	0.0512	0.517578	no
TestASV_49 (Parasutterella) abundance	German	8956	1079417	-0.0633	0.0528	-1.19886	no
TestASV_5 (Bacteroides) abundance	German	8956	1086047	-0.0195	0.0556	-0.350719	no
TestASV_6 (Subdoligranulum) abundance	German	8956	1077308	-0.0314	0.0521	-0.602687	no
TestASV_7 (Bacteroides) abundance	German	8956	1085168	-0.0776	0.0474	-1.63713	no
TestASV_8 (Bacteroides) abundance	German	8956	1092542	-0.0035	0.0499	-0.0701403	no
TestASV_9 (Alistipes) abundance	German	8956	1082214	0.0875	0.0501	1.74651	yes
p_Actinobacteria	Dutch	7727	1038394	0.1323	0.0707	1.87129	yes
c_Actinobacteria	Dutch	7727	1038394	0.1323	0.0707	1.87129	yes
o_Actinomycetales	Dutch	2367	1037956	-0.0787	0.1797	-0.437952	no
f_Micrococcaceae	Dutch	1959	1037927	0.0759	0.215	0.353023	no
g_Rothia	Dutch	1959	1037927	0.0866	0.2185	0.396339	no
s_Rothia_mucilaginosa	Dutch	1895	1037901	0.0656	0.2203	0.297776	no
o_Bifidobacteriales	Dutch	7252	1038388	0.1485	0.0788	1.88452	yes
f_Bifidobacteriaceae	Dutch	7252	1038388	0.1485	0.0788	1.88452	yes
g_Bifidobacterium	Dutch	7244	1038389	0.1378	0.0782	1.76215	yes
s_Bifidobacterium_adolescentis	Dutch	6328	1038347	0.1586	0.0904	1.75442	yes
s_Bifidobacterium_bifidum	Dutch	2041	1038061	0.0149	0.2022	0.0736894	no
s_Bifidobacterium_catenulatum	Dutch	1138	1037903	0.9845	0.3944	2.4962	yes
s_Bifidobacterium_longum	Dutch	6650	1038310	0.1397	0.0836	1.67105	yes
o_Coriobacteriales	Dutch	7685	1038386	-0.043	0.0593	-0.725126	no
f_Coriobacteriaceae	Dutch	7685	1038386	-0.0431	0.0593	-0.726813	no
g_Adlercreutzia	Dutch	3501	1026382	0.0377	0.1487	0.253531	no
s_Adlercreutzia_equolifaciens	Dutch	3501	1038021	0.0462	0.1495	0.30903	no
g_Collinsella	Dutch	7210	1038366	-0.006	0.0628	-0.0955414	no
s_Collinsella_aerofaciens	Dutch	7056	1038335	0.0252	0.0708	0.355932	no
g_Eggerthella	Dutch	2000	1038289	-0.2205	0.223	-0.988789	no
s_Eggerthella_unclassified	Dutch	1868	993400	-0.328	0.2213	-1.48215	no
g_Gordonibacter	Dutch	1175	1037831	-0.0893	0.3727	-0.239603	no
s_Gordonibacter_pamelaeae	Dutch	1175	1037831	-0.0794	0.3727	-0.21304	no
p_Bacteroidetes	Dutch	7737	1038391	0.0176	0.0606	0.290429	no
c_Bacteroidia	Dutch	7737	1038391	0.0178	0.0606	0.293729	no
o_Bacteroidales	Dutch	7737	1038391	0.0178	0.0606	0.293729	no
f_Bacteroidaceae	Dutch	7729	1038384	0.0455	0.0667	0.682159	no
g_Bacteroides	Dutch	7729	1038384	0.046	0.0668	0.688623	no
s_Bacteroides_caccae	Dutch	5672	1028144	0.1175	0.0735	1.59864	no
s_Bacteroides_cellulosilyticus	Dutch	3526	1038244	0.2603	0.1486	1.75168	yes
s_Bacteroides_clarus	Dutch	1773	1038120	0.0408	0.2843	0.14351	no
s_Bacteroides_coprocola	Dutch	1559	1035741	0.1685	0.2822	0.597094	no
s_Bacteroides_dorei	Dutch	6945	1038374	-0.0165	0.0587	-0.28109	no
s_Bacteroides_eggerthii	Dutch	2749	1038182	0.1857	0.1891	0.98202	no
s_Bacteroides_faecis	Dutch	1512	947569	0.2885	0.3241	0.890157	no
s_Bacteroides_finegoldii	Dutch	1836	1038215	-0.0682	0.2845	-0.239719	no
s_Bacteroides_fragilis	Dutch	3164	1029213	0.1274	0.1654	0.770254	no
s_Bacteroides_intestinalis	Dutch	1633	1037952	-0.3339	0.2366	-1.41124	no
s_Bacteroides_massiliensis	Dutch	3427	1002587	0.0433	0.1296	0.334105	no
s_Bacteroides_nordii	Dutch	1019	1037779	0.0445	0.3709	0.119978	no
s_Bacteroides_ovatus	Dutch	6903	1038392	0.0327	0.0671	0.487332	no
s_Bacteroides_plebeius	Dutch	1776	1038098	-0.1401	0.2492	-0.562199	no
s_Bacteroides_salyersiae	Dutch	1420	1030250	-0.0053	0.316	-0.0167722	no
s_Bacteroides_stercoris	Dutch	5103	1038366	-0.0077	0.0792	-0.0972222	no
s_Bacteroides_thetaiotaomicron	Dutch	6151	1038346	-0.0475	0.0779	-0.609756	no
s_Bacteroides_uniformis	Dutch	7629	1038390	0.0517	0.0676	0.764793	no
s_Bacteroides_vulgatus	Dutch	7437	1038439	-0.0869	0.0602	-1.44352	no
s_Bacteroides_xylanisolvens	Dutch	5434	990919	0.108	0.0881	1.22588	no
f_Bacteroidales_noname	Dutch	7159	1038328	0.1283	0.066	1.94394	yes
g_Bacteroidales_noname	Dutch	7159	1038328	0.129	0.066	1.95455	yes
s_Bacteroidales_bacterium_ph8	Dutch	7159	1038328	0.1303	0.0662	1.96828	yes
f_Porphyromonadaceae	Dutch	7674	1038357	0.0407	0.0616	0.660714	no
g_Barnesiella	Dutch	6843	1038344	0.1452	0.0755	1.92318	yes
s_Barnesiella_intestinihominis	Dutch	6843	1038344	0.1499	0.0758	1.97757	yes
g_Coprobacter	Dutch	3777	1038119	0.1011	0.1224	0.82598	no
s_Coprobacter_fastidiosus	Dutch	3777	1038119	0.1022	0.122	0.837705	no
g_Odoribacter	Dutch	6832	1038391	0.0723	0.0724	0.998619	no
s_Odoribacter_splanchnicus	Dutch	5925	1038212	-0.0828	0.0891	-0.929293	no
g_Parabacteroides	Dutch	7461	1038368	0.0094	0.0636	0.147799	no
s_Parabacteroides_distasonis	Dutch	6241	1038306	-0.045	0.0747	-0.60241	no
s_Parabacteroides_goldsteinii	Dutch	1621	1037971	-0.013	0.2915	-0.0445969	no
s_Parabacteroides_johnsonii	Dutch	1480	1038168	-0.3675	0.322	-1.1413	no
s_Parabacteroides_merdae	Dutch	5923	1038409	-0.0138	0.082	-0.168293	no
s_Parabacteroides_unclassified	Dutch	3894	1037979	0.095	0.1186	0.801012	no
f_Prevotellaceae	Dutch	6586	1038357	-0.0014	0.0733	-0.0190996	no
g_Paraprevotella	Dutch	3949	1038385	-0.0319	0.1068	-0.298689	no
s_Paraprevotella_clara	Dutch	3562	974704	-0.161	0.1172	-1.37372	no
s_Paraprevotella_unclassified	Dutch	3949	1038385	-0.0313	0.1106	-0.283002	no
s_Paraprevotella_xylaniphila	Dutch	2588	1038256	-0.2258	0.1717	-1.31508	no
g_Prevotella	Dutch	5924	1038320	-0.0225	0.0759	-0.296443	no
s_Prevotella_copri	Dutch	5832	1038369	-0.0214	0.0782	-0.273657	no
f_Rikenellaceae	Dutch	7728	1038386	-0.0025	0.0594	-0.0420875	no
g_Alistipes	Dutch	7728	1038386	-0.0019	0.0595	-0.0319328	no
s_Alistipes_finegoldii	Dutch	6726	1038363	0.014	0.0652	0.214724	no
s_Alistipes_indistinctus	Dutch	5371	1038422	-0.0566	0.0913	-0.619934	no
s_Alistipes_onderdonkii	Dutch	7393	1038354	-0.0559	0.0658	-0.849544	no
s_Alistipes_putredinis	Dutch	7590	1038356	0.0326	0.0653	0.499234	no
s_Alistipes_senegalensis	Dutch	6393	997410	0.2678	0.0808	3.31436	yes
s_Alistipes_shahii	Dutch	7381	1038334	-0.0657	0.0627	-1.04785	no
s_Alistipes_sp_AP11	Dutch	3022	1038075	0.0927	0.1528	0.606675	no
p_Firmicutes	Dutch	7738	931775	0.0756	0.0724	1.0442	no
c_Bacilli	Dutch	4169	1038072	-0.1183	0.1251	-0.945643	no
o_Lactobacillales	Dutch	4100	1038065	-0.1429	0.1263	-1.13143	no
f_Lactobacillaceae	Dutch	1705	1037937	-0.3291	0.2549	-1.29109	no
g_Lactobacillus	Dutch	1702	1037893	-0.3185	0.2551	-1.24853	no
s_Lactobacillus_delbrueckii	Dutch	1240	1038009	-0.4505	0.3598	-1.25208	no
f_Streptococcaceae	Dutch	3448	1037977	-0.3097	0.1297	-2.38782	no
g_Streptococcus	Dutch	3359	1037976	-0.2525	0.1327	-1.90279	no
s_Streptococcus_parasanguinis	Dutch	1592	1037858	-0.4219	0.2864	-1.47311	no
s_Streptococcus_salivarius	Dutch	1696	1037922	-0.2046	0.2152	-0.950743	no
s_Streptococcus_thermophilus	Dutch	2054	994529	-0.7262	0.2117	-3.43033	no
c_Clostridia	Dutch	7738	985193	0.075	0.0667	1.12444	no
o_Clostridiales	Dutch	7738	1038392	0.0654	0.065	1.00615	no
f_Clostridiaceae	Dutch	3838	1038195	-0.2287	0.1139	-2.0079	no
g_Clostridium	Dutch	3784	1038227	-0.2386	0.1138	-2.09666	no
s_Clostridium_asparagiforme	Dutch	1337	1038230	-0.5541	0.3363	-1.64764	no
s_Clostridium_leptum	Dutch	2526	1038005	-0.2955	0.1691	-1.74749	no
f_Clostridiales_noname	Dutch	4758	1038247	-0.1007	0.0919	-1.09576	no
g_Flavonifractor	Dutch	2589	1038327	0.2382	0.164	1.45244	no
s_Flavonifractor_plautii	Dutch	2589	990366	0.2455	0.167	1.47006	no
g_Pseudoflavonifractor	Dutch	3499	963528	0.0338	0.1297	0.260601	no
s_Pseudoflavonifractor_capillosus	Dutch	3499	1038222	0.0634	0.1282	0.49454	no
f_Eubacteriaceae	Dutch	7688	1038422	-0.0057	0.0578	-0.0986159	no
g_Eubacterium	Dutch	7688	1038422	-0.006	0.0578	-0.103806	no
s_Eubacterium_eligens	Dutch	6327	1038375	-0.0095	0.0662	-0.143505	no
s_Eubacterium_hallii	Dutch	3699	1038309	0.1116	0.133	0.839098	no
s_Eubacterium_ramulus	Dutch	3613	1038031	-0.0298	0.1395	-0.21362	no
s_Eubacterium_rectale	Dutch	7444	1038373	-0.0239	0.065	-0.367692	no
s_Eubacterium_siraeum	Dutch	5791	1019075	-0.0409	0.0804	-0.508706	no
s_Eubacterium_ventriosum	Dutch	2620	1038088	-0.1871	0.178	-1.05112	no
f_Lachnospiraceae	Dutch	7737	1038395	0.0092	0.054	0.17037	no
g_Blautia	Dutch	6637	1038266	-0.0182	0.0697	-0.261119	no
s_Ruminococcus_obeum	Dutch	5807	1038195	-0.0004	0.1007	-0.00397219	no
s_Ruminococcus_torques	Dutch	4390	1038294	0.091	0.1065	0.85446	no
g_Butyrivibrio	Dutch	1436	1038061	-0.2657	0.3173	-0.837378	no
s_Butyrivibrio_crossotus	Dutch	1428	1038077	-0.2891	0.3209	-0.900904	no
g_Coprococcus	Dutch	6402	1038343	0.004	0.0833	0.0480192	no
s_Coprococcus_catus	Dutch	4752	1038158	-0.1729	0.1016	-1.70177	no
s_Coprococcus_comes	Dutch	5734	1038329	-0.0115	0.083	-0.138554	no
s_Coprococcus_sp_ART55_1	Dutch	1089	1027068	0.3233	0.4243	0.761961	no
g_Dorea	Dutch	6901	1038264	0.0729	0.0733	0.994543	no
s_Dorea_formicigenerans	Dutch	4116	967514	-0.0381	0.1164	-0.32732	no
s_Dorea_longicatena	Dutch	5813	1038300	0.1222	0.0847	1.44274	no
s_Dorea_unclassified	Dutch	2279	1038118	0.1451	0.2079	0.697932	no
g_Lachnospiraceae_noname	Dutch	7497	1038360	0.0645	0.0687	0.938865	no
s_Lachnospiraceae_bacterium_1_1_57FAA	Dutch	1293	1021619	-0.066	0.2974	-0.221923	no
s_Lachnospiraceae_bacterium_3_1_46FAA	Dutch	3096	1038356	-0.0549	0.1366	-0.401903	no
s_Lachnospiraceae_bacterium_5_1_63FAA	Dutch	1090	1038265	0.5224	0.3933	1.32825	no
s_Lachnospiraceae_bacterium_7_1_58FAA	Dutch	7319	1038364	0.0385	0.0706	0.545326	no
s_Lachnospiraceae_bacterium_8_1_57FAA	Dutch	1902	1038155	-0.3289	0.2719	-1.20964	no
g_Roseburia	Dutch	7710	1038385	0.0053	0.0614	0.0863192	no
s_Roseburia_hominis	Dutch	6801	1038288	-0.0898	0.0676	-1.3284	no
s_Roseburia_intestinalis	Dutch	5323	1036035	0.0604	0.093	0.649462	no
s_Roseburia_inulinivorans	Dutch	6411	1038332	-0.0154	0.0657	-0.234399	no
s_Roseburia_unclassified	Dutch	2951	1037468	0.2367	0.1491	1.58753	no
f_Oscillospiraceae	Dutch	7719	1038413	0.1216	0.0596	2.04027	yes
g_Oscillibacter	Dutch	7719	1038413	0.1214	0.0596	2.03691	yes
s_Oscillibacter_unclassified	Dutch	7719	1038413	0.122	0.0599	2.03673	yes
f_Ruminococcaceae	Dutch	7738	1038392	0.1135	0.0643	1.76516	yes
g_Anaerotruncus	Dutch	1445	1038393	-0.1598	0.2802	-0.570307	no
g_Faecalibacterium	Dutch	7728	1038396	0.0912	0.0599	1.52254	no
s_Faecalibacterium_prausnitzii	Dutch	7728	1038396	0.0874	0.0596	1.46644	no
g_Ruminococcaceae_noname	Dutch	1562	1038143	0.088	0.323	0.272446	no
s_Ruminococcaceae_bacterium_D16	Dutch	1562	995857	0.1152	0.3137	0.36723	no
g_Ruminococcus	Dutch	6746	1038384	0.0602	0.087	0.691954	no
s_Ruminococcus_bromii	Dutch	5087	1000369	0.0748	0.1062	0.704331	no
s_Ruminococcus_callidus	Dutch	2829	967735	-0.0739	0.1751	-0.422045	no
s_Ruminococcus_lactaris	Dutch	4123	1025439	-0.0819	0.1082	-0.756932	no
g_Subdoligranulum	Dutch	7738	1038392	0.1024	0.0602	1.701	yes
s_Subdoligranulum_unclassified	Dutch	7738	908765	0.0732	0.0632	1.15823	no
c_Erysipelotrichia	Dutch	5389	1038299	-0.0608	0.0841	-0.722949	no
o_Erysipelotrichales	Dutch	5389	1038299	-0.0608	0.0841	-0.722949	no
f_Erysipelotrichaceae	Dutch	5389	1038299	-0.0608	0.0841	-0.722949	no
g_Erysipelotrichaceae_noname	Dutch	2886	1038230	-0.0733	0.162	-0.452469	no
s_Eubacterium_biforme	Dutch	2061	1038064	-0.2576	0.2305	-1.11757	no
g_Holdemania	Dutch	3551	1038158	-0.0079	0.1219	-0.0648072	no
s_Holdemania_filiformis	Dutch	2268	1038130	-0.0424	0.2266	-0.187114	no
s_Holdemania_unclassified	Dutch	2440	945331	-0.2504	0.213	-1.17559	no
c_Negativicutes	Dutch	6494	1038368	-0.0025	0.0746	-0.0335121	no
o_Selenomonadales	Dutch	6494	1038368	-0.0026	0.0746	-0.0348525	no
f_Acidaminococcaceae	Dutch	2734	1038243	0.072	0.1913	0.376372	no
g_Phascolarctobacterium	Dutch	2201	1038212	0.0538	0.2262	0.237843	no
s_Phascolarctobacterium_succinatutens	Dutch	2201	1038212	0.0438	0.2262	0.193634	no
f_Veillonellaceae	Dutch	5309	1038222	0.0503	0.0974	0.516427	no
g_Dialister	Dutch	3361	1038116	0.0686	0.1323	0.518519	no
s_Dialister_invisus	Dutch	3060	1038109	0.098	0.1516	0.646438	no
g_Veillonella	Dutch	2534	1037899	0.0558	0.1619	0.344657	no
s_Veillonella_unclassified	Dutch	2499	1037984	-0.0124	0.1535	-0.0807818	no
p_Proteobacteria	Dutch	7720	803974	-0.0833	0.0698	-1.19341	no
c_Betaproteobacteria	Dutch	7586	985512	-0.002	0.0646	-0.0309598	no
o_Burkholderiales	Dutch	7586	1038372	0.0016	0.0648	0.0246914	no
f_Burkholderiales_noname	Dutch	3300	1038258	-0.0672	0.1327	-0.506405	no
g_Burkholderiales_noname	Dutch	3297	1038229	-0.0684	0.1326	-0.515837	no
s_Burkholderiales_bacterium_1_1_47	Dutch	3297	1038229	-0.0676	0.1325	-0.510189	no
f_Oxalobacteraceae	Dutch	2833	1038193	0.0427	0.1662	0.256919	no
g_Oxalobacter	Dutch	2833	1038193	0.0428	0.1661	0.257676	no
s_Oxalobacter_formigenes	Dutch	2833	1030338	0.0531	0.1623	0.327172	no
f_Sutterellaceae	Dutch	7499	1038416	-0.0213	0.0665	-0.320301	no
g_Parasutterella	Dutch	4095	1038305	-0.0684	0.1195	-0.572385	no
s_Parasutterella_excrementihominis	Dutch	4095	1038305	-0.0676	0.1198	-0.564274	no
g_Sutterella	Dutch	5562	1038346	-0.0456	0.0949	-0.480506	no
s_Sutterella_wadsworthensis	Dutch	5552	1037921	-0.0265	0.0956	-0.277197	no
g_Sutterellaceae_unclassified	Dutch	3063	1038145	-0.1883	0.1478	-1.27402	no
c_Deltaproteobacteria	Dutch	7042	1038369	-0.0661	0.0694	-0.95245	no
o_Desulfovibrionales	Dutch	7042	1038369	-0.0661	0.0694	-0.95245	no
f_Desulfovibrionaceae	Dutch	7042	1038369	-0.0661	0.0694	-0.95245	no
g_Bilophila	Dutch	6881	1038394	0.0071	0.0663	0.107089	no
s_Bilophila_unclassified	Dutch	6869	1038405	0.0089	0.0675	0.131852	no
s_Bilophila_wadsworthia	Dutch	5588	1038502	-0.0008	0.0847	-0.0094451	no
g_Desulfovibrio	Dutch	3161	1003831	-0.1687	0.1242	-1.35829	no
s_Desulfovibrio_piger	Dutch	2645	919477	-0.2417	0.1636	-1.47738	no
c_Gammaproteobacteria	Dutch	6415	953117	0.1087	0.081	1.34198	no
o_Enterobacteriales	Dutch	5763	1038229	0.0225	0.0864	0.260417	no
f_Enterobacteriaceae	Dutch	5763	1038229	0.0225	0.0864	0.260417	no
g_Escherichia	Dutch	5602	1038181	0.0448	0.0881	0.508513	no
s_Escherichia_coli	Dutch	4040	1038275	0.0101	0.1185	0.0852321	no
s_Escherichia_unclassified	Dutch	4971	1038159	0.0892	0.1003	0.889332	no
o_Pasteurellales	Dutch	2473	1038065	0.2146	0.1811	1.18498	no
f_Pasteurellaceae	Dutch	2473	1038065	0.2143	0.1811	1.18332	no
g_Haemophilus	Dutch	2453	1038055	0.2345	0.1837	1.27654	no
s_Haemophilus_parainfluenzae	Dutch	2425	1038124	0.3223	0.1862	1.73093	yes
p_Verrucomicrobia	Dutch	6090	989796	0.0262	0.0853	0.307151	no
c_Verrucomicrobiae	Dutch	6090	1038382	0.0333	0.0838	0.397375	no
o_Verrucomicrobiales	Dutch	6090	1038382	0.0332	0.0838	0.396181	no
f_Verrucomicrobiaceae	Dutch	6090	1038382	0.0332	0.0837	0.396655	no
g_Akkermansia	Dutch	6090	1038382	0.0329	0.0837	0.39307	no
s_Akkermansia_muciniphila	Dutch	6090	1017173	0.0244	0.0825	0.295758	no
p_Actinobacteria	Large	16708	1062059	0.0297	0.0354	0.838983	no
p_Bacteroidetes	Large	16939	1061940	0.024	0.021	1.14286	no
p_Cyanobacteria	Large	6862	1061371	-0.0066	0.0649	-0.101695	no
p_Euryarchaeota	Large	3754	1052084	0.0928	0.1148	0.808362	no
p_Firmicutes	Large	16943	1061944	0.0002	0.026	0.00769231	no
p_Lentisphaerae	Large	4602	1061639	-0.0939	0.0845	-1.11124	no
p_Proteobacteria	Large	16861	1061936	0.029	0.0234	1.23932	no
p_Tenericutes	Large	10867	1061996	0.0081	0.0379	0.21372	no
p_Verrucomicrobia	Large	11821	1062092	0.0654	0.0344	1.90116	yes
c_Actinobacteria	Large	15197	1061994	0.0801	0.0407	1.96806	yes
c_Alphaproteobacteria	Large	9214	1061760	0.0505	0.0484	1.04339	no
c_Bacilli	Large	16205	1061899	0.0107	0.0259	0.413127	no
c_Bacteroidia	Large	16938	1061940	0.0244	0.0211	1.1564	no
c_Betaproteobacteria	Large	15894	1061990	-0.0015	0.0267	-0.0561798	no
c_Clostridia	Large	16943	1061944	0.0171	0.0259	0.660232	no
c_Coriobacteriia	Large	16464	1062123	-0.0145	0.025	-0.58	no
c_Deltaproteobacteria	Large	14253	1061946	0.0352	0.028	1.25714	no
c_Erysipelotrichia	Large	16858	1061964	-0.0108	0.0245	-0.440816	no
c_Gammaproteobacteria	Large	14883	1062081	0.0748	0.0285	2.62456	yes
c_Lentisphaeria	Large	4597	1061656	-0.0836	0.0848	-0.985849	no
c_Melainabacteria	Large	5702	1061380	-0.0129	0.0708	-0.182203	no
c_Methanobacteria	Large	3600	1047294	0.0604	0.1261	0.478985	no
c_Mollicutes	Large	10867	1061996	0.0081	0.0379	0.21372	no
c_Negativicutes	Large	16810	1061938	0.0026	0.0255	0.101961	no
c_Verrucomicrobiae	Large	11361	1062177	0.0715	0.0373	1.91689	yes
o_Actinomycetales	Large	7506	1062137	-0.05	0.0547	-0.914077	no
o_Bacillales	Large	3190	1006584	-0.205	0.1461	-1.40315	no
o_Bacteroidales	Large	16938	1061940	0.0244	0.0211	1.1564	no
o_Bifidobacteriales	Large	13917	1061898	0.0874	0.0481	1.81705	yes
o_Burkholderiales	Large	15846	1061994	-0.0043	0.0265	-0.162264	no
o_Clostridiales	Large	16943	1061944	0.018	0.0259	0.694981	no
o_Coriobacteriales	Large	16464	1062123	-0.0145	0.025	-0.58	no
o_Desulfovibrionales	Large	14231	1061947	0.035	0.0283	1.23675	no
o_Enterobacteriales	Large	12781	1062172	0.0318	0.031	1.02581	no
o_Erysipelotrichales	Large	16858	1061964	-0.0108	0.0245	-0.440816	no
o_Pasteurellales	Large	8957	1062050	-0.009	0.0469	-0.191898	no
o_Verrucomicrobiales	Large	11361	1062177	0.0715	0.0373	1.91689	yes
o_Victivallales	Large	4597	1061656	-0.0836	0.0848	-0.985849	no
o_Gastranaerophilales	Large	5693	1061388	-0.0177	0.0708	-0.25	no
o_Lactobacillales	Large	16131	1061886	0.0154	0.0267	0.576779	no
o_Methanobacteriales	Large	3600	1047294	0.0604	0.1261	0.478985	no
o_Mollicutes_RF9	Large	9904	1061984	0.0092	0.0431	0.213457	no
o_NB1n	Large	4986	1062046	-0.0648	0.085	-0.762353	no
o_Rhodospirillales	Large	8298	1062144	0.0363	0.0487	0.74538	no
o_Selenomonadales	Large	16810	1061938	0.0026	0.0255	0.101961	no
f_Acidaminococcaceae	Large	11839	1061594	0.0121	0.0343	0.35277	no
f_Actinomycetaceae	Large	7506	1062141	-0.0476	0.0547	-0.870201	no
f_Alcaligenaceae	Large	15601	1061997	-0.0004	0.0261	-0.0153257	no
f_Bacteroidaceae	Large	16908	1061945	0.0159	0.024	0.6625	no
f_Bacteroidales_S24_7_group	Large	7641	1061483	-0.0602	0.0482	-1.24896	no
f_Bifidobacteriaceae	Large	13917	1061898	0.0874	0.0481	1.81705	yes
f_Christensenellaceae	Large	15757	1062018	0.0422	0.0263	1.60456	no
f_Clostridiaceae_1	Large	13413	1061920	0.0801	0.0297	2.69697	yes
f_Clostridiales_vadinBB60_group	Large	10058	1062269	-0.0231	0.0393	-0.587786	no
f_Coriobacteriaceae	Large	16464	1062123	-0.0145	0.025	-0.58	no
f_Defluviitaleaceae	Large	7942	1062346	-0.0045	0.0553	-0.0813743	no
f_Desulfovibrionaceae	Large	14230	1061946	0.0337	0.0284	1.18662	no
f_Enterobacteriaceae	Large	12781	1062172	0.0318	0.031	1.02581	no
f_Erysipelotrichaceae	Large	16858	1061964	-0.0108	0.0245	-0.440816	no
f_FamilyXI	Large	3146	948135	-0.1401	0.1507	-0.929662	no
f_FamilyXIII	Large	15734	1061951	-0.0033	0.0288	-0.114583	no
f_Lachnospiraceae	Large	16943	1061944	0.0267	0.0219	1.21918	no
f_Lactobacillaceae	Large	6774	1061380	-0.0357	0.0628	-0.568471	no
f_Methanobacteriaceae	Large	3600	1047294	0.0602	0.1261	0.477399	no
f_Oxalobacteraceae	Large	5042	1062041	-0.1536	0.0729	-2.107	no
f_Pasteurellaceae	Large	8957	1062050	-0.009	0.0469	-0.191898	no
f_Peptococcaceae	Large	10288	1062029	-0.0264	0.0415	-0.636145	no
f_Peptostreptococcaceae	Large	15020	1061896	0.0942	0.0262	3.59542	yes
f_Porphyromonadaceae	Large	16684	1061936	0.0445	0.0252	1.76587	yes
f_Prevotellaceae	Large	13863	1061729	0.0136	0.03	0.453333	no
f_Rhodospirillaceae	Large	8217	1062209	0.0407	0.0495	0.822222	no
f_Rikenellaceae	Large	16490	1061933	-0.0065	0.0242	-0.268595	no
f_Ruminococcaceae	Large	16939	1061942	0.0064	0.0243	0.263374	no
f_Streptococcaceae	Large	15559	1061963	0.0341	0.0281	1.21352	no
f_Veillonellaceae	Large	14838	1061909	0.0218	0.0275	0.792727	no
f_Verrucomicrobiaceae	Large	11361	1062177	0.0714	0.0373	1.91421	yes
f_Victivallaceae	Large	3831	1054518	-0.0998	0.1108	-0.900722	no
g_Clostridium_innocuum_group	Large	4078	1058360	0.0554	0.1013	0.54689	no
g_Eubacterium_brachy_group	Large	3928	1056641	0.0127	0.1258	0.100954	no
g_Eubacterium_coprostanoligenes_group	Large	16141	1062001	0.0227	0.0239	0.949791	no
g_Eubacterium_eligens_group	Large	13835	1061963	0.0217	0.0333	0.651652	no
g_Eubacterium_fissicatena_group	Large	3739	1052720	-0.0725	0.1251	-0.579536	no
g_Eubacterium_hallii_group	Large	15411	1061887	0.0062	0.0257	0.241245	no
g_Eubacterium_nodatum_group	Large	3269	1038855	-0.0244	0.1454	-0.167813	no
g_Eubacterium_oxidoreducens_group	Large	5171	1061686	0.0358	0.0834	0.429257	no
g_Eubacterium_rectale_group	Large	16094	1061986	0.0047	0.024	0.195833	no
g_Eubacterium_ruminantium_group	Large	7392	1061486	0.0901	0.059	1.52712	no
g_Eubacterium_ventriosum_group	Large	14394	1061952	-0.0264	0.0304	-0.868421	no
g_Eubacterium_xylanophilum_group	Large	12686	1062157	0.0533	0.0331	1.61027	no
g_Ruminococcus_gauvreauii_group	Large	12651	1061932	0.0211	0.0341	0.618768	no
g_Ruminococcus_gnavus_group	Large	6174	1061732	-0.0153	0.0658	-0.232523	no
g_Ruminococcus_torques_group	Large	16496	1061922	-0.009	0.0263	-0.342205	no
g_Actinomyces	Large	7275	1062093	-0.0036	0.0583	-0.0617496	no
g_Adlercreutzia	Large	8024	1062202	0.0081	0.0515	0.157282	no
g_Akkermansia	Large	11360	1062176	0.0724	0.0373	1.94102	yes
g_Alistipes	Large	16395	1061934	0.0033	0.0254	0.129921	no
g_Allisonella	Large	3205	904856	0.0349	0.1539	0.226771	no
g_Alloprevotella	Large	3007	729397	-0.1121	0.1551	-0.72276	no
g_Anaerofilum	Large	4955	1062505	0.0377	0.0924	0.408009	no
g_Anaerostipes	Large	15714	1061805	0.0419	0.0291	1.43986	no
g_Anaerotruncus	Large	15506	1061954	0.0205	0.0278	0.73741	no
g_Bacteroides	Large	16908	1061945	0.0159	0.024	0.6625	no
g_Barnesiella	Large	13502	1062207	0.0372	0.0268	1.38806	no
g_Bifidobacterium	Large	13794	1061932	0.0798	0.0481	1.65904	yes
g_Bilophila	Large	12205	1062057	0.0293	0.0343	0.854227	no
g_Blautia	Large	16904	1061945	0.0493	0.0223	2.21076	yes
g_Butyricicoccus	Large	16046	1061995	-0.0041	0.0266	-0.154135	no
g_Butyricimonas	Large	10292	1061978	0.0288	0.0419	0.687351	no
g_Butyrivibrio	Large	3435	1045543	-3.9799e-05	0.1233	-0.000322782	no
g_Candidatus_Soleaferrea	Large	5973	1062465	-0.1053	0.079	-1.33291	no
g_Catenibacterium	Large	3233	901952	0.0181	0.1532	0.118146	no
g_Christensenellaceae_R_7_group	Large	15301	1062095	0.0579	0.0271	2.13653	yes
g_Clostridium_sensu_stricto_1	Large	13297	1061968	0.0694	0.0295	2.35254	yes
g_Collinsella	Large	13644	1062172	0.0035	0.0301	0.116279	no
g_Coprobacter	Large	6571	1062025	0.0641	0.0653	0.981623	no
g_Coprococcus_1	Large	15661	1062007	0.0102	0.0292	0.349315	no
g_Coprococcus_2	Large	10912	1061998	0.0324	0.0419	0.77327	no
g_Coprococcus_3	Large	14839	1061994	0.0056	0.0276	0.202899	no
g_Defluviitaleaceae_UCG_011	Large	7923	1062353	0.0009	0.0563	0.0159858	no
g_Desulfovibrio	Large	8891	1061997	-0.0486	0.0482	-1.0083	no
g_Dialister	Large	11356	1061958	-0.0378	0.0388	-0.974227	no
g_Dorea	Large	16342	1061981	-0.0192	0.0251	-0.76494	no
g_Eggerthella	Large	5027	1062068	0.0964	0.0872	1.1055	no
g_Eisenbergiella	Large	5453	1062811	0.0193	0.0802	0.240648	no
g_Enterorhabdus	Large	7337	1061981	0.0276	0.0573	0.481675	no
g_Erysipelatoclostridium	Large	9414	1062260	0.0778	0.0416	1.87019	yes
g_Erysipelotrichaceae_UCG_003	Large	14032	1061945	0.0517	0.0286	1.80769	yes
g_Escherichia_Shigella	Large	11395	1062233	0.0131	0.037	0.354054	no
g_Faecalibacterium	Large	16735	1061944	0.0215	0.0239	0.899582	no
g_Family_XIII_AD3011_group	Large	13427	1062023	0.0315	0.0318	0.990566	no
g_Family_XIII_UCG_001	Large	12192	1061993	-0.0101	0.0326	-0.309816	no
g_Flavonifractor	Large	10280	1061769	0.062	0.0423	1.46572	no
g_Fusicatenibacter	Large	16148	1061986	-0.0073	0.0255	-0.286275	no
g_Gordonibacter	Large	3678	1051604	-0.05	0.1269	-0.394011	no
g_Haemophilus	Large	8692	1062115	-0.0003	0.0488	-0.00614754	no
g_Holdemanella	Large	7420	1061849	-0.0975	0.0531	-1.83616	no
g_Holdemania	Large	8773	1062392	0.0092	0.0484	0.190083	no
g_Howardella	Large	3712	1052683	-0.0494	0.1035	-0.477295	no
g_Hungatella	Large	4098	1058453	-0.1958	0.0942	-2.07856	no
g_Intestinibacter	Large	11713	1062106	0.0536	0.0368	1.45652	no
g_Intestinimonas	Large	11470	1061807	-0.0297	0.0348	-0.853448	no
g_Lachnoclostridium	Large	16593	1061962	0.0504	0.0257	1.96109	yes
g_Lachnospira	Large	15325	1061982	-0.0104	0.0252	-0.412698	no
g_Lachnospiraceae_FCS020_group	Large	13116	1062126	0.0913	0.0349	2.61605	yes
g_Lachnospiraceae_NC2004_group	Large	6049	1061521	0.0403	0.0709	0.568406	no
g_Lachnospiraceae_ND3007_group	Large	14362	1061982	-0.0194	0.0259	-0.749035	no
g_Lachnospiraceae_NK4A136_group	Large	16079	1061908	-0.0059	0.0216	-0.273148	no
g_Lachnospiraceae_UCG_001	Large	9769	1062164	-0.0675	0.0417	-1.61871	no
g_Lachnospiraceae_UCG_004	Large	13519	1061829	0.0515	0.0307	1.67752	yes
g_Lachnospiraceae_UCG_008	Large	6760	1061466	-0.0569	0.0635	-0.896063	no
g_Lachnospiraceae_UCG_010	Large	12488	1061749	0.012	0.033	0.363636	no
g_Lactobacillus	Large	6680	1061381	-0.0247	0.0646	-0.382353	no
g_Lactococcus	Large	3951	1055016	-0.0142	0.1029	-0.137998	no
g_Marvinbryantia	Large	11469	1062196	0.0019	0.0335	0.0567164	no
g_Methanobrevibacter	Large	3503	1044451	0.1106	0.1324	0.835347	no
g_Odoribacter	Large	13881	1062112	-0.0255	0.0282	-0.904255	no
g_Olsenella	Large	3706	1055033	-0.0049	0.1205	-0.0406639	no
g_Oscillibacter	Large	8586	1061022	-0.0274	0.0564	-0.485816	no
g_Oscillospira	Large	9746	1061848	0.0226	0.0461	0.490239	no
g_Oxalobacter	Large	4553	1062175	-0.1956	0.0806	-2.4268	no
g_Parabacteroides	Large	16027	1061913	0.0184	0.0267	0.689139	no
g_Paraprevotella	Large	6855	1061042	-0.0106	0.0578	-0.183391	no
g_Parasutterella	Large	10862	1061981	0.0037	0.0427	0.0866511	no
g_Peptococcus	Large	5521	1061928	0.017	0.0759	0.223979	no
g_Phascolarctobacterium	Large	10547	1061475	-0.0288	0.0358	-0.804469	no
g_Prevotella_7	Large	3442	1045549	0.0375	0.1317	0.284738	no
g_Prevotella_9	Large	9649	1061030	-0.0652	0.0404	-1.61386	no
g_Rikenellaceae_RC9_gut_group	Large	3284	1030843	0.1175	0.1284	0.915109	no
g_Romboutsia	Large	13364	1061952	0.0271	0.0288	0.940972	no
g_Roseburia	Large	16544	1061942	0.021	0.0242	0.867769	no
g_Ruminiclostridium_5	Large	16277	1061988	-0.0291	0.0268	-1.08582	no
g_Ruminiclostridium_6	Large	12706	1062203	-0.0463	0.0364	-1.27198	no
g_Ruminiclostridium_9	Large	15642	1061941	0.0909	0.027	3.36667	yes
g_Ruminococcaceae_NK4A214_group	Large	14370	1062067	0.0137	0.0303	0.452145	no
g_Ruminococcaceae_UCG_002	Large	15885	1061991	0.015	0.03	0.5	no
g_Ruminococcaceae_UCG_003	Large	13508	1062014	0.0182	0.0275	0.661818	no
g_Ruminococcaceae_UCG_004	Large	9139	1062605	0.0237	0.0424	0.558962	no
g_Ruminococcaceae_UCG_005	Large	15112	1062120	0.0414	0.028	1.47857	no
g_Ruminococcaceae_UCG_009	Large	7255	1061879	-0.0386	0.0612	-0.630719	no
g_Ruminococcaceae_UCG_010	Large	12234	1062134	0.0166	0.0328	0.506098	no
g_Ruminococcaceae_UCG_011	Large	3610	1052624	0.0186	0.1442	0.128988	no
g_Ruminococcaceae_UCG_013	Large	15722	1062020	-0.0381	0.0255	-1.49412	no
g_Ruminococcaceae_UCG_014	Large	13609	1061992	0.0192	0.0337	0.569733	no
g_Ruminococcus_1	Large	15519	1061987	-0.0273	0.0265	-1.03019	no
g_Ruminococcus_2	Large	14413	1061966	0.032	0.0267	1.1985	no
g_Sellimonas	Large	3135	1027931	0.205	0.1544	1.32772	no
g_Senegalimassilia	Large	6740	1062281	-0.1284	0.064	-2.00625	no
g_Slackia	Large	5936	1062377	0.1261	0.0789	1.59823	no
g_Streptococcus	Large	15349	1061993	0.0173	0.0279	0.620072	no
g_Subdoligranulum	Large	16308	1061956	0.0153	0.0234	0.653846	no
g_Sutterella	Large	12475	1061978	0.0308	0.0389	0.791774	no
g_Terrisporobacter	Large	6413	1062186	0.0742	0.0686	1.08163	no
g_Turicibacter	Large	8618	1062024	0.0261	0.0491	0.531568	no
g_Tyzzerella_3	Large	5197	1061003	-0.0729	0.082	-0.889024	no
g_Veillonella	Large	8830	1061702	-0.0085	0.0447	-0.190157	no
g_Victivallis	Large	3256	947399	-0.0912	0.1334	-0.683658	no
Abbreviations: Gut microbiota taxon, name of bacteria GWAS from four gut microbiota GWAS studies; study, article name for short ( FINRISK, Combined effects of host genetics and diet on human gut microbiota and incident disease in a single population cohort; Dutch, Effect of host genetics on the gut microbiome in 7,738 participants of the Dutch Microbiome Project; German, Genome-wide association s…

## Sheet: Supplementary Table 3
Supplementary Table 3. Estimated LDSC polygenic SNP heritability for 97 unique GM taxa GWASs and eBMD GWAS
Gut taxa and BMD GWAS	GWAS study	Taxonomy	sample_size	n_snps	obs_h2	obs_h2_se	scale_h2_z
eBMD	2018 eBMD	-	426824	1133456	0.2723	0.0182	14.9615
Absiella dolichum	FINRISK	Species	5959	1127096	0.187	0.0815	2.29448
Alteromonadaceae	FINRISK	Family	5959	1127096	0.1379	0.0788	1.75
Bacteroides A plebeius	FINRISK	Species	5959	1127096	0.1854	0.081	2.28889
Bifidobacterium breve	FINRISK	Species	5959	1127096	0.2962	0.1603	1.84779
Bifidobacterium infantis	FINRISK	Species	5959	1127096	0.3076	0.1296	2.37346
Bifidobacterium kashiwanohense	FINRISK	Species	5959	1127096	0.2275	0.1233	1.84509
Bifidobacterium longum	FINRISK	Species	5959	1127096	0.2444	0.1206	2.02653
Bifidobacterium pseudocatenulatum	FINRISK	Species	5959	1127096	0.2099	0.127	1.65276
Bifidobacterium ruminantium	FINRISK	Species	5959	1127096	0.349	0.1426	2.44741
CAG-269 sp001915995	FINRISK	Species	5959	1127096	0.1966	0.0836	2.35167
CAG-273 sp003534295	FINRISK	Species	5959	1127096	0.1989	0.0813	2.44649
CAG-345 sp000433315	FINRISK	Species	5959	1127096	0.1587	0.0775	2.04774
CAG-345	FINRISK	Genus	5959	1127096	0.1782	0.0772	2.30829
CAG-390 sp003523225	FINRISK	Species	5959	1127096	0.1957	0.1116	1.75358
CAG-448 sp000433415	FINRISK	Species	5959	1127096	0.1535	0.083	1.8494
CHKCI006 sp900018345	FINRISK	Species	5959	1127096	0.1622	0.0702	2.31054
Clostridium E sporosphaeroides	FINRISK	Species	5959	1127096	0.144	0.0847	1.70012
Clostridium saudiense	FINRISK	Species	5959	1127096	0.1334	0.0774	1.72351
Clostridium tertium	FINRISK	Species	5959	1127096	0.1297	0.0722	1.7964
Eubacterium I ramulus A	FINRISK	Species	5959	1127096	0.1436	0.0825	1.74061
Eubacterium Q	FINRISK	Genus	5959	1127096	0.1345	0.0792	1.69823
Ezakiellaceae	FINRISK	Family	5959	1127096	0.1252	0.0753	1.66268
Faecalicatena torques	FINRISK	Species	5959	1127096	0.1875	0.0796	2.35553
Fibrobacteraceae	FINRISK	Family	5959	1127096	0.2782	0.0993	2.80161
Fibrobacterales	FINRISK	Order	5959	1127096	0.2643	0.0964	2.7417
Fibrobacteria	FINRISK	Class	5959	1127096	0.2872	0.0986	2.91278
Flavonifractor sp002159265	FINRISK	Species	5959	1127096	0.1495	0.0759	1.9697
GCA-900066575 sp900066385	FINRISK	Species	5959	1127096	0.1544	0.0809	1.90853
Haloplasmatales	FINRISK	Order	5959	1127096	0.1781	0.1003	1.77567
Holdemania sp900120005	FINRISK	Species	5959	1127096	0.3115	0.109	2.8578
Holdemania	FINRISK	Genus	5959	1127096	0.3035	0.0982	3.09063
koll11	FINRISK	Species	5959	1127096	0.1744	0.0783	2.22733
Lawsonibacter sp002161175	FINRISK	Species	5959	1127096	0.1344	0.0756	1.77778
Massiliomicrobiota sp002160815	FINRISK	Species	5959	1127096	0.1445	0.0791	1.8268
Massiliomicrobiota	FINRISK	Genus	5959	1127096	0.1569	0.0812	1.93227
Merdibacter massiliensis	FINRISK	Species	5959	1127096	0.2104	0.0771	2.72892
Microvirga	FINRISK	Genus	5959	1127096	0.1976	0.0797	2.4793
Negativibacillus sp000435195	FINRISK	Species	5959	1127096	0.229	0.0946	2.42072
Negativibacillus	FINRISK	Genus	5959	1127096	0.2952	0.1085	2.72074
Prevotellamassilia sp000437675	FINRISK	Species	5959	1127096	0.1477	0.0761	1.94087
Prevotellamassilia	FINRISK	Genus	5959	1127096	0.1725	0.0808	2.1349
Prevotella sp002437285	FINRISK	Species	5959	1127096	0.1298	0.0768	1.6901
Prevotella sp900317685	FINRISK	Species	5959	1127096	0.1304	0.0734	1.77657
Rhodanobacter	FINRISK	Genus	5959	1127096	0.1558	0.0828	1.88164
Roseibacillus	FINRISK	Genus	5959	1127096	0.1424	0.0745	1.91141
Rubneribacter sp002159915	FINRISK	Species	5959	1127096	0.1707	0.0763	2.23722
Succiniclasticum	FINRISK	Genus	5959	1127096	0.1579	0.0768	2.05599
Turicibacteraceae	FINRISK	Family	5959	1127096	0.1906	0.1026	1.8577
Turicibacter	FINRISK	Genus	5959	1127096	0.1893	0.0994	1.90443
UBA1375 sp002305795	FINRISK	Species	5959	1127096	0.1669	0.0722	2.31163
UBA5394 sp002409725	FINRISK	Species	5959	1127096	0.1634	0.0892	1.83184
UBA7177 sp002491225	FINRISK	Species	5959	1127096	0.1471	0.079	1.86203
UBA7182	FINRISK	Genus	5959	1127096	0.1599	0.0826	1.93584
UBA9475 sp002161675	FINRISK	Species	5959	1127096	0.1757	0.0797	2.20452
Parabacteroides	German	Genus	8956	1087915	0.1007	0.0528	1.9072
Bacteroides	German	Genus	8956	1082341	0.1183	0.0568	2.08275
Sutterella	German	Genus	8956	1082418	0.1142	0.0535	2.13458
Faecalibacterium	German	Genus	8956	1082908	0.0902	0.0495	1.82222
Ruminococcaceae	German	Family	8956	1087603	0.0936	0.0527	1.77609
Phascolarctobacterium	German	Genus	8956	1078446	0.1213	0.0563	2.15453
Barnesiella	German	Genus	8956	1082699	0.1193	0.0564	2.11525
Alistipes	German	Genus	8956	1082214	0.0875	0.0501	1.74651
Bifidobacteriales	Dutch	Order	7252	1038388	0.1485	0.0788	1.88452
Bifidobacteriaceae	Dutch	Family	7252	1038388	0.1485	0.0788	1.88452
Bifidobacterium	Dutch	Genus	7244	1038389	0.1378	0.0782	1.76215
Bifidobacterium adolescentis	Dutch	Species	6328	1038347	0.1586	0.0904	1.75442
Bifidobacterium catenulatum	Dutch	Species	1138	1037903	0.9845	0.3944	2.4962
Bifidobacterium longum	Dutch	Species	6650	1038310	0.1397	0.0836	1.67105
Bacteroidecellulosilyticus	Dutch	Species	3526	1038244	0.2603	0.1486	1.75168
Bacteroidalenoname	Dutch	Genus	7159	1038328	0.129	0.066	1.95455
Bacteroidalebacterium ph8	Dutch	Species	7159	1038328	0.1303	0.0662	1.96828
Barnesiella intestinihominis	Dutch	Species	6843	1038344	0.1499	0.0758	1.97757
Alistipesenegalensis	Dutch	Species	6393	997410	0.2678	0.0808	3.31436
Oscillospiraceae	Dutch	Family	7719	1038413	0.1216	0.0596	2.04027
Oscillibacter	Dutch	Genus	7719	1038413	0.1214	0.0596	2.03691
Oscillibacter unclassified	Dutch	Species	7719	1038413	0.122	0.0599	2.03673
Subdoligranulum	Dutch	Genus	7738	1038392	0.1024	0.0602	1.701
Haemophiluparainfluenzae	Dutch	Species	2425	1038124	0.3223	0.1862	1.73093
Verrucomicrobia	Large	Phylum	11821	1062092	0.0654	0.0344	1.90116
Actinobacteria	Large	Class	15197	1061994	0.0801	0.0407	1.96806
Gammaproteobacteria	Large	Class	14883	1062081	0.0748	0.0285	2.62456
Verrucomicrobiae	Large	Class	11361	1062177	0.0715	0.0373	1.91689
Verrucomicrobiales	Large	Order	11361	1062177	0.0715	0.0373	1.91689
Clostridiaceae 1	Large	Family	13413	1061920	0.0801	0.0297	2.69697
Peptostreptococcaceae	Large	Family	15020	1061896	0.0942	0.0262	3.59542
Porphyromonadaceae	Large	Family	16684	1061936	0.0445	0.0252	1.76587
Verrucomicrobiaceae	Large	Family	11361	1062177	0.0714	0.0373	1.91421
Akkermansia	Large	Genus	11360	1062176	0.0724	0.0373	1.94102
Blautia	Large	Genus	16904	1061945	0.0493	0.0223	2.21076
Christensenellaceae R7 group	Large	Genus	15301	1062095	0.0579	0.0271	2.13653
Clostridium sensu stricto 1	Large	Genus	13297	1061968	0.0694	0.0295	2.35254
Erysipelatoclostridium	Large	Genus	9414	1062260	0.0778	0.0416	1.87019
Erysipelotrichaceae UC003	Large	Genus	14032	1061945	0.0517	0.0286	1.80769
Lachnoclostridium	Large	Genus	16593	1061962	0.0504	0.0257	1.96109
Lachnospiraceae FCS020 group	Large	Genus	13116	1062126	0.0913	0.0349	2.61605
Lachnospiraceae UC004	Large	Genus	13519	1061829	0.0515	0.0307	1.67752
Ruminiclostridium 9	Large	Genus	15642	1061941	0.0909	0.027	3.36667
Abbreviation: eBMD, UK Biobank bone mineral density as estimated by heel quantitative ultrasound; TB, life-course meta-analysis of Total body BMD; LS, Lumbar Spine bone mineral density; FA, Forearm bone mineral density; FN, femoral Neck bone mineral density; GWAS study, article name for GWAS study (2018 eBMD, An atlas of genetic influences on osteoporosis in humans and mice; FINRISK, Combined eff…

## Sheet: Supplementary Table 4
Supplementary Table 3. Pearson correlation results between the SNP Z-scores from the estimate BMD and gut taxa GWASs.
Gut microbiota taxon	n_snps	cor	cor_95CI	unadjust_P	fdr
Absiella dolichum	58953	-0.00262617	-0.0107 - 0.0054	0.523708	0.733192
Alteromonadaceae	58953	-0.0022575	-0.0103 - 0.0058	0.583607	0.583607
Bacteroides A plebeius	58953	0.00367612	-0.0044 - 0.0117	0.372088	0.685425
Bifidobacterium breve	58953	-0.000774369	-0.0088 - 0.0073	0.850863	0.875888
Bifidobacterium infantis	58953	-0.000558212	-0.0086 - 0.0075	0.892189	0.892189
Bifidobacterium kashiwanohense	58953	0.00502069	-0.0031 - 0.0131	0.22283	0.591177
Bifidobacterium longum	58953	-0.00379614	-0.0119 - 0.0043	0.356679	0.685425
Bifidobacterium pseudocatenulatum	58953	0.00643045	-0.0016 - 0.0145	0.118444	0.484181
Bifidobacterium ruminantium	58953	0.00454065	-0.0035 - 0.0126	0.270252	0.591177
Clostridium CAG-269 sp001915995	58953	-0.00573692	-0.0138 - 0.0023	0.163637	0.533965
Clostridium CAG-273 sp003534295	58953	-0.00277077	-0.0108 - 0.0053	0.501108	0.733192
Firmicutes bacterium CAG-345 sp000433315	58953	-0.00703005	-0.0151 - 0.001	0.0878355	0.484181
Firmicutes bacterium CAG-345	58953	-0.00577678	-0.0138 - 0.0023	0.16073	0.50841
Anaerotruncus CAG-390 sp003523225	58953	0.00334914	-0.0047 - 0.0114	0.416116	0.693784
Clostridium CAG-448 sp000433415	58953	-0.00185255	-0.0099 - 0.0062	0.652853	0.761662
Clostridiales CHKCI006 sp900018345	58953	0.00195637	-0.0061 - 0.01	0.63478	0.761662
Clostridium E sporosphaeroides	58953	0.00195485	-0.0061 - 0.01	0.635043	0.761662
Clostridium saudiense	58953	-0.00924988	-0.0173 - -0.0012	0.0247084	0.288265
Clostridium tertium	58953	0.00274462	-0.0053 - 0.0108	0.505156	0.733192
Eubacterium I ramulus A	58953	0.00152473	-0.0065 - 0.0096	0.711229	0.803001
Eubacterium Q	58953	0.00133185	-0.0067 - 0.0094	0.746411	0.814267
Ezakiellaceae	58953	0.00485825	-0.0032 - 0.0129	0.23816	0.317547
Faecalicatena torques	58953	-0.00428154	-0.0124 - 0.0038	0.29854	0.614642
Fibrobacteraceae	58953	-0.00588609	-0.014 - 0.0022	0.152958	0.305915
Fibrobacterales	58953	-0.00587636	-0.0139 - 0.0022	0.153637	0.153637
Fibrobacteria	58953	-0.00574697	-0.0138 - 0.0023	0.1629	0.1629
Flavonifractor sp002159265	58953	0.0095136	0.0014 - 0.0176	0.0208899	0.288265
Lachnospiraceae GCA-900066575 sp900066385	58953	-0.00568052	-0.0138 - 0.0024	0.167818	0.533965
Haloplasmatales	58953	-0.00895663	-0.017 - -0.0009	0.0296508	0.0593016
Holdemania sp900120005	58953	0.00196471	-0.0061 - 0.01	0.633338	0.761662
Holdemania	58953	0.00404978	-0.004 - 0.0121	0.325462	0.650924
koll11	58953	-0.00334803	-0.0114 - 0.0047	0.41627	0.693784
Lawsonibacter sp002161175	58953	0.00938406	0.0013 - 0.0175	0.0226961	0.288265
Massiliomicrobiota sp002160815	58953	0.000891474	-0.0072 - 0.009	0.828636	0.875888
Massiliomicrobiota	58953	-0.00174901	-0.0098 - 0.0063	0.671082	0.814267
Merdibacter massiliensis	58953	0.00274664	-0.0053 - 0.0108	0.504843	0.733192
Microvirga	58953	-0.00836109	-0.0164 - -0.0003	0.0423445	0.368346
Negativibacillus sp000435195	58953	0.00815943	0.0001 - 0.0162	0.047574	0.416273
Negativibacillus	58953	-0.00152171	-0.0096 - 0.0066	0.711774	0.814267
Prevotellamassilia sp000437675	58953	0.00460777	-0.0035 - 0.0127	0.263234	0.591177
Prevotellamassilia	58953	0.00259311	-0.0055 - 0.0107	0.528948	0.793422
Prevotella sp002437285	58953	0.00632668	-0.0017 - 0.0144	0.124504	0.484181
Prevotella sp900317685	58953	-0.00128166	-0.0094 - 0.0068	0.755657	0.8265
Rhodanobacter	58953	9.10935e-05	-0.008 - 0.0082	0.982354	0.982354
Roseibacillus	58953	0.00514215	-0.0029 - 0.0132	0.211837	0.50841
Rubneribacter sp002159915	58953	0.00461107	-0.0035 - 0.0127	0.262893	0.591177
Succiniclasticum	58953	-0.00531491	-0.0134 - 0.0028	0.196885	0.50841
Turicibacteraceae	58953	-0.00844469	-0.0165 - -0.0004	0.0403236	0.161294
Turicibacter	58953	-0.00770441	-0.0158 - 0.0004	0.0613909	0.368346
Ruminococcaceae UBA1375 sp002305795	58953	-0.0023409	-0.0104 - 0.0057	0.569781	0.761662
Catabacter UBA5394 sp002409725	58953	0.00456264	-0.0035 - 0.0126	0.267939	0.591177
Faecalibacterium UBA7177 sp002491225	58953	0.00642017	-0.0017 - 0.0145	0.119034	0.484181
Lachnospiraceae UBA7182	58953	-0.00337288	-0.0114 - 0.0047	0.41282	0.707691
Oscillospiraceae UBA9475 sp002161675	58953	0.00670806	-0.0014 - 0.0148	0.103367	0.484181
Parabacteroides	33652	-0.0060158	-0.0167 - 0.0047	0.26978	0.62892
Bacteroides	32880	0.00248087	-0.0083 - 0.0133	0.652819	0.874317
Sutterella	32982	-0.0100263	-0.0208 - 0.0008	0.0686221	0.240177
Faecalibacterium	32950	0.000871406	-0.0099 - 0.0117	0.874317	0.874317
Ruminococcaceae	33396	-0.00390672	-0.0146 - 0.0068	0.475269	0.475269
Phascolarctobacterium	32736	-0.00161734	-0.0124 - 0.0092	0.769809	0.874317
Barnesiella	33209	0.0104245	-0.0003 - 0.0212	0.0574696	0.240177
Alistipes	32869	0.00505545	-0.0058 - 0.0159	0.359383	0.62892
Bifidobacteriales	32854	-0.00703021	-0.0178 - 0.0038	0.202565	0.202565
Bifidobacteriaceae	32855	-0.00708593	-0.0179 - 0.0037	0.199002	0.38064
Bifidobacterium	32859	-0.00693527	-0.0177 - 0.0039	0.208693	0.504219
Bifidobacterium adolescentis	32878	-0.0153112	-0.0261 - -0.0045	0.00549624	0.0494662
Bifidobacterium catenulatum	32837	0.00254361	-0.0083 - 0.0134	0.644853	0.72546
Bifidobacterium longum	32863	0.00542964	-0.0054 - 0.0162	0.324971	0.584948
Bacteroides cellulosilyticus	32872	-0.00776458	-0.0186 - 0.003	0.159197	0.419849
Bacteroidales noname	32869	-0.00363296	-0.0144 - 0.0072	0.510123	0.510123
Bacteroidales bacterium ph8	32869	-0.00326466	-0.0141 - 0.0075	0.553935	0.712203
Barnesiella intestinihominis	32846	0.00746814	-0.0033 - 0.0183	0.175898	0.419849
Alistipes senegalensis	31712	0.00741637	-0.0036 - 0.0184	0.1866	0.419849
Oscillospiraceae	32858	-0.0048366	-0.0156 - 0.006	0.38064	0.38064
Oscillibacter	32858	-0.00486178	-0.0157 - 0.006	0.378164	0.504219
Oscillibacter unclassified	32858	-0.0042024	-0.015 - 0.0066	0.446205	0.669308
Subdoligranulum	32860	-0.00543899	-0.0162 - 0.0054	0.324161	0.504219
Haemophilus parainfluenzae	32842	0.000589683	-0.0102 - 0.0114	0.914897	0.914897
Verrucomicrobia	34053	0.00738442	-0.0032 - 0.018	0.17298	0.17298
Actinobacteria	35040	0.0032215	-0.0072 - 0.0137	0.54649	0.54649
Gammaproteobacteria	34945	0.00781229	-0.0027 - 0.0183	0.144178	0.432533
Verrucomicrobiae	33973	0.00436419	-0.0063 - 0.015	0.421169	0.54649
Verrucomicrobiales	33973	0.00436419	-0.0063 - 0.015	0.421169	0.421169
Clostridiaceae 1	34491	0.00286759	-0.0077 - 0.0134	0.59434	0.641424
Peptostreptococcaceae	34786	0.00249697	-0.008 - 0.013	0.641424	0.641424
Porphyromonadaceae	35044	0.00457466	-0.0059 - 0.015	0.391789	0.641424
Verrucomicrobiaceae	33973	0.00433884	-0.0063 - 0.015	0.423872	0.641424
Akkermansia	33973	0.00433564	-0.0063 - 0.015	0.424213	0.848426
Blautia	35045	-0.0045768	-0.015 - 0.0059	0.391561	0.848426
Christensenellaceae R7 group	34799	-0.00566044	-0.0162 - 0.0048	0.291002	0.848426
Clostridium sensu stricto 1	34463	0.00251248	-0.008 - 0.0131	0.640915	0.891782
Erysipelatoclostridium	33601	-0.00136374	-0.0121 - 0.0093	0.802604	0.891782
Erysipelotrichaceae UCG_003	34521	0.0124824	0.0019 - 0.023	0.0203797	0.203797
Lachnoclostridium	35039	5.9384e-05	-0.0104 - 0.0105	0.991131	0.991131
Lachnospiraceae FCS020 group	34197	-0.00179679	-0.0124 - 0.0088	0.739686	0.891782
Lachnospiraceae UCG_004	34590	0.00187616	-0.0087 - 0.0124	0.727139	0.891782
Ruminiclostridium 9	34786	0.00756587	-0.0029 - 0.0181	0.158209	0.791045
Abbreviations: Gut microbiota taxon, name of bacteria GWAS from four gut microbiota GWAS studies; n_snps, number of SNPs used for correlations; cor: correlations (two-sided) between independent SNP z_scores; cor_95CI, lower and uper interval of correlation between independent SNP z_scores; unadjust_P, unadjusted p_value of the statistics for correlations between independent SNP z_scores; fdr, adj…

## Sheet: Supplementary Table 5
Supplementary Table 5. GWAS-PW findings including the number of loci that fit each of the GWAS-PW four scenarios for the included bacteria taxa and eBMD.
Gut microbiota taxon	n_loci	ppa1_0.9	ppa2_0.9	ppa3_0.9	ppa4_0.9	prop	loci_chr	loci_st	loci_sp	loci_snp
Absiella dolichum	1703	1703	0	0	0	NA	-	-	-	-
Alteromonadaceae	1703	1703	0	0	0	NA	-	-	-	-
Bacteroides A plebeius	1703	1703	0	0	0	NA	-	-	-	-
Bifidobacterium breve	1703	1699	0	0	2	0	-	-	-	-
Bifidobacterium infantis	1703	1700	0	0	1	0	-	-	-	-
Bifidobacterium kashiwanohense	1703	1701	0	0	1	0	-	-	-	-
Bifidobacterium longum	1703	1701	0	0	1	0	-	-	-	-
Bifidobacterium pseudocatenulatum	1703	1700	0	1	0	1	2	135159453	137041842	rs2090660
Bifidobacterium ruminantium	1703	1699	0	0	1	0	-	-	-	-
Clostridium CAG-269 sp001915995	1703	1703	0	0	0	NA	-	-	-	-
Clostridium CAG-273 sp003534295	1703	1703	0	0	0	NA	-	-	-	-
Firmicutes bacterium CAG-345 sp000433315	1703	1703	0	0	0	NA	-	-	-	-
Firmicutes bacterium CAG-345	1703	1703	0	0	0	NA	-	-	-	-
Anaerotruncus CAG-390 sp003523225	1703	1701	0	0	0	NA	-	-	-	-
Clostridium CAG-448 sp000433415	1703	1703	0	0	0	NA	-	-	-	-
Clostridiales CHKCI006 sp900018345	1703	1699	0	1	0	1	12	171836	1079768	rs215226
Clostridium E sporosphaeroides	1703	1702	0	0	0	NA	-	-	-	-
Clostridium saudiense	1703	1701	0	0	0	NA	-	-	-	-
Clostridium tertium	1703	1703	0	0	0	NA	-	-	-	-
Eubacterium I ramulus A	1703	1701	0	1	0	1	11	26046095	27020178	rs72874734
Eubacterium Q	1703	1703	0	0	0	NA	-	-	-	-
Ezakiellaceae	1703	1703	0	0	0	NA	-	-	-	-
Faecalicatena torques	1703	1700	0	1	0	1	9	135298917	137040737	rs635634
Fibrobacteraceae	1703	1703	0	0	0	NA	-	-	-	-
Fibrobacterales	1703	1703	0	0	0	NA	-	-	-	-
Fibrobacteria	1703	1703	0	0	0	NA	-	-	-	-
Flavonifractor sp002159265	1703	1703	0	0	0	NA	-	-	-	-
Lachnospiraceae GCA-900066575 sp900066385	1703	1703	0	0	0	NA	-	-	-	-
Haloplasmatales	1703	1701	0	0	1	0	-	-	-	-
Holdemania sp900120005	1703	1703	0	0	0	NA	-	-	-	-
Holdemania	1703	1703	0	0	0	NA	-	-	-	-
koll11	1703	1703	0	0	0	NA	-	-	-	-
Lawsonibacter sp002161175	1703	1703	0	0	0	NA	-	-	-	-
Massiliomicrobiota sp002160815	1703	1703	0	0	0	NA	-	-	-	-
Massiliomicrobiota	1703	1703	0	0	0	NA	-	-	-	-
Merdibacter massiliensis	1703	1700	0	1	0	1	12	171836	1079768	rs215226
Microvirga	1703	1703	0	0	0	NA	-	-	-	-
Negativibacillus sp000435195	1703	1702	0	1	0	1	2	135159453	137041842	rs2090660
Negativibacillus	1703	1702	0	0	1	0	-	-	-	-
Prevotellamassilia sp000437675	1703	1703	0	0	0	NA	-	-	-	-
Prevotellamassilia	1703	1703	0	0	0	NA	-	-	-	-
Prevotella sp002437285	1703	1702	0	0	0	NA	-	-	-	-
Prevotella sp900317685	1703	1703	0	0	0	NA	-	-	-	-
Rhodanobacter	1703	1703	0	0	0	NA	-	-	-	-
Roseibacillus	1703	1703	0	0	0	NA	-	-	-	-
Rubneribacter sp002159915	1703	1701	0	0	0	NA	-	-	-	-
Succiniclasticum	1703	1703	0	0	0	NA	-	-	-	-
Turicibacteraceae	1703	1700	0	0	1	0	-	-	-	-
Turicibacter	1703	1702	0	1	0	1	2	135159453	137041842	rs2090660
Ruminococcaceae UBA1375 sp002305795	1703	1703	0	0	0	NA	-	-	-	-
Catabacter UBA5394 sp002409725	1703	1703	0	0	0	NA	-	-	-	-
Faecalibacterium UBA7177 sp002491225	1703	1699	0	1	0	1	4	6773546	7538492	rs185701058
Lachnospiraceae UBA7182	1703	1703	0	0	0	NA	-	-	-	-
Oscillospiraceae UBA9475 sp002161675	1703	1703	0	0	0	NA	-	-	-	-
Parabacteroides	1703	1703	0	0	0	NA	-	-	-	-
Bacteroides	1703	1703	0	0	0	NA	-	-	-	-
Sutterella	1703	1703	0	0	0	NA	-	-	-	-
Faecalibacterium	1703	1702	0	1	0	1	9	135298917	137040737	rs635634
Ruminococcaceae	1703	1703	0	0	0	NA	-	-	-	-
Phascolarctobacterium	1703	1703	0	0	0	NA	-	-	-	-
Barnesiella	1703	1703	0	0	0	NA	-	-	-	-
Alistipes	1703	1703	0	0	0	NA	-	-	-	-
Bifidobacteriales	1703	1702	0	1	0	1	2	135159453	137041842	rs2090660
Bifidobacteriaceae	1703	1702	0	1	0	1	2	135159453	137041842	rs2090660
Bifidobacterium	1703	1702	0	1	0	1	2	135159453	137041842	rs2090660
Bifidobacterium adolescentis	1703	1699	0	1	0	1	2	135159453	137041842	rs2090660
Bifidobacterium catenulatum	1703	1703	0	0	0	NA	-	-	-	-
Bifidobacterium longum	1703	1700	0	0	0	NA	-	-	-	-
Bacteroides cellulosilyticus	1703	1703	0	0	0	NA	-	-	-	-
Bacteroidales noname	1703	1703	0	0	0	NA	-	-	-	-
Bacteroidales bacterium ph8	1703	1703	0	0	0	NA	-	-	-	-
Barnesiella intestinihominis	1703	1703	0	0	0	NA	-	-	-	-
Alistipes senegalensis	1643	1643	0	0	0	NA	-	-	-	-
Oscillospiraceae	1703	1703	0	0	0	NA	-	-	-	-
Oscillibacter	1703	1703	0	0	0	NA	-	-	-	-
Oscillibacter unclassified	1703	1703	0	0	0	NA	-	-	-	-
Subdoligranulum	1703	1703	0	0	0	NA	-	-	-	-
Haemophilus parainfluenzae	1703	1703	0	0	0	NA	-	-	-	-
Verrucomicrobia	1703	1703	0	0	0	NA	-	-	-	-
Actinobacteria	1703	1698	0	0	1	0	-	-	-	-
Gammaproteobacteria	1703	1703	0	0	0	NA	-	-	-	-
Verrucomicrobiae	1703	1703	0	0	0	NA	-	-	-	-
Verrucomicrobiales	1703	1703	0	0	0	NA	-	-	-	-
Clostridiaceae 1	1703	1703	0	0	0	NA	-	-	-	-
Peptostreptococcaceae	1703	1703	0	0	0	NA	-	-	-	-
Porphyromonadaceae	1703	1703	0	0	0	NA	-	-	-	-
Verrucomicrobiaceae	1703	1703	0	0	0	NA	-	-	-	-
Akkermansia	1703	1703	0	0	0	NA	-	-	-	-
Blautia	1703	1703	0	0	0	NA	-	-	-	-
Christensenellaceae R7 group	1703	1703	0	0	0	NA	-	-	-	-
Clostridium sensu stricto 1	1703	1703	0	0	0	NA	-	-	-	-
Erysipelatoclostridium	1703	1703	0	0	0	NA	-	-	-	-
Erysipelotrichaceae UCG_003	1703	1703	0	0	0	NA	-	-	-	-
Lachnoclostridium	1703	1703	0	0	0	NA	-	-	-	-
Lachnospiraceae FCS020 group	1703	1703	0	0	0	NA	-	-	-	-
Lachnospiraceae UCG_004	1703	1703	0	0	0	NA	-	-	-	-
Ruminiclostridium 9	1703	1703	0	0	0	NA	-	-	-	-
Abbreviations: Gut microbiota taxon, name of bacteria GWAS from four gut micriobiota GWAS studies; n_loci, total number of independent loci analysed by GWAS-PW; ppa1_0.9, number of loci with posterior probability >= 0.9 supporting scenario 1 (ppa1; the locus is affecting only BMD); ppa2_0.9: number of loci with posterior probability >= 0.9 supporting scenario 2 (ppa2; the locus is affecting only …

## Sheet: Supplementary Table 6
Supplementary Table 6. Results for expression of genes associated with gut microbiota taxa.
Expression database	Gene	Gut microbiota taxon	b_SMR	se_SMR	P_SMR
Artery Tibial	B4GALNT3	Clostridiales CHKCI006 sp900018345	-0.0781357	0.0155811	5.30949e-07
		Merdibacter massiliensis	-0.0764802	0.0152526	5.32434e-07
	MCM6	Bifidobacterium infantis	0.282964	0.0571892	7.50349e-07
		Bifidobacterium pseudocatenulatum	0.368265	0.0794122	3.52852e-06
		Bifidobacterium ruminantium	0.392862	0.0748291	1.51997e-07
eQTLgen	ABO	Faecalicatena torques	-0.116369	0.0234408	6.89214e-07
	MCM6	Bifidobacteriales	0.314481	0.0485546	9.36492e-11
		Bifidobacteriaceae	0.314565	0.0485547	9.2597e-11
		Bifidobacterium	0.311448	0.0485058	1.35516e-10
		Bifidobacterium adolescentis	0.271007	0.0460913	4.10805e-09
	LCT	Bifidobacteriales	0.147006	0.0229096	1.39202e-10
		Bifidobacteriaceae	0.147044	0.0229097	1.37694e-10
		Bifidobacterium	0.145582	0.022887	2.00531e-10
		Bifidobacterium adolescentis	0.143312	0.0242682	3.51908e-09
Abbreviation: Expression database, the expression quantitative trait locus study(Artery Tibial tissue in GTEx consortium based on GTEx version 7; eQTLGen consortium in the blood tissue); b_SMR, estimate effect coefficient of summary-based Mendelian randomization analysis; se_SMR, the standard error of estimate coefficient; P_SMR, the P value of association for summary-based Mendelian randomizatio…

## Sheet: Supplementary Table 7
Supplementary Table 7. The overall Mendelian Randomization results between candidate gut microbiota taxa and BMD.
Gut microbiota taxon	BMD traits	MR analysis	SNP	Estimate	Std Error	95% CI Lower	95% CI Upper	P-value
Bifidobacterium pseudocatenulatum	eBMD	Inverse-variance weighted	3	-0.025842	0.00871	-0.04291	-0.00877	0.003009
		Weighted median	3	-0.023266	0.01033	-0.04351	-0.003026	0.024261
		MR-Egger	3	-0.058027	0.08105	-0.21689	0.100838	0.474055
		MR-Egger intercept	3	0.004617	0.01156	-0.01804	0.027272	0.689604
Clostridiales CHKCI006 sp900018345	eBMD	Inverse-variance weighted	1	0.4172	0.03566	0.3473	0.4871	1.317e-31
		Weighted median	-	-	-	-	-	-
		MR-Egger	-	-	-	-	-	-
		MR-Egger intercept	-	-	-	-	-	-
Eubacterium I ramulus A	eBMD	Inverse-variance weighted	1	-0.0496	0.04307	-0.134	0.03481	0.2495
		Weighted median	-	-	-	-	-	-
		MR-Egger	-	-	-	-	-	-
		MR-Egger intercept	-	-	-	-	-	-
Faecalicatena torques	eBMD	Inverse-variance weighted	1	0.01358	0.02986	-0.04495	0.07211	0.6493
		Weighted median	-	-	-	-	-	-
		MR-Egger	-	-	-	-	-	-
		MR-Egger intercept	-	-	-	-	-	-
Merdibacter massiliensis	eBMD	Inverse-variance weighted	1	0.3241	0.03527	0.2549	0.3932	4.036e-20
		Weighted median	-	-	-	-	-	-
		MR-Egger	-	-	-	-	-	-
		MR-Egger intercept	-	-	-	-	-	-
Negativibacillus sp000435195	eBMD	Inverse-variance weighted	3	0.054235	0.01394	0.02692	0.08155	9.944e-05
		Weighted median	3	0.04968	0.01807	0.01426	0.0851	0.005979
		MR-Egger	3	0.078567	1.09722	-2.07195	2.22908	0.9429
		MR-Egger intercept	3	-0.002154	0.09713	-0.19253	0.18822	0.9823
Turicibacter	eBMD	Inverse-variance weighted	2	0.04104	0.015855	0.009969	0.07212	0.009632
		Weighted median	-	-	-	-	-	-
		MR-Egger	-	-	-	-	-	-
		MR-Egger intercept	-	-	-	-	-	-
Faecalibacterium UBA7177 sp002491225	eBMD	Inverse-variance weighted	-	-	-	-	-	-
		Weighted median	-	-	-	-	-	-
		MR-Egger	-	-	-	-	-	-
		MR-Egger intercept	-	-	-	-	-	-
Faecalibacterium	eBMD	Inverse-variance weighted	1	-0.1692	0.01867	-0.2058	-0.1326	1.305e-19
		Weighted median	-	-	-	-	-	-
		MR-Egger	-	-	-	-	-	-
		MR-Egger intercept	-	-	-	-	-	-
Bifidobacteriales	eBMD	Inverse-variance weighted	3	-0.029216	0.008865	-0.04659	-0.011842	0.0009815
		Weighted median	3	-0.02843	0.010562	-0.04913	-0.007728	0.0071098
		MR-Egger	3	-0.095721	0.126216	-0.3431	0.151658	0.448218
		MR-Egger intercept	3	0.009307	0.017619	-0.02523	0.04384	0.597348
Bifidobacteriaceae	eBMD	Inverse-variance weighted	3	-0.029211	0.008863	-0.04658	-0.011839	0.0009815
		Weighted median	3	-0.028425	0.01056	-0.04912	-0.007727	0.0071107
		MR-Egger	3	-0.095731	0.126222	-0.34312	0.151659	0.44819
		MR-Egger intercept	3	0.009311	0.017623	-0.02523	0.043851	0.59728
Bifidobacterium	eBMD	Inverse-variance weighted	3	-0.029492	0.008947	-0.04703	-0.011957	0.0009791
		Weighted median	3	-0.028803	0.010656	-0.04969	-0.007917	0.0068734
		MR-Egger	3	-0.092995	0.123603	-0.33525	0.149262	0.451829
		MR-Egger intercept	3	0.008807	0.017096	-0.0247	0.042315	0.606473
Bifidobacterium adolescentis	eBMD	Inverse-variance weighted	4	-0.031419	0.007603	-0.04632	-0.01652	3.585e-05
		Weighted median	4	-0.031656	0.009186	-0.04966	-0.01365	0.000569
		MR-Egger	4	-0.089833	0.111829	-0.30901	0.12935	0.4218
		MR-Egger intercept	4	0.008305	0.015862	-0.02278	0.03939	0.6006
Haloplasmatales	eBMD	Inverse-variance weighted	3	0.04885	0.01527	0.01891	0.07878	0.001381
		Weighted median	3	0.05239	0.01891	0.01532	0.08947	0.005603
		MR-Egger	3	0.20336	1.39286	-2.52659	2.93331	0.883919
		MR-Egger intercept	3	-0.01246	0.11235	-0.23266	0.20774	0.911663
The table contains the associations of genetic determined the abundance of candidate gut microbiota taxa with eBMD triats by using different MR methods. Abbreviations: SNPs, The number of IVs for MR analysis; Estimate, A regression coefficient. 95% CI: its 95% confidence interval; eBMD, correlations with UK Biobank bone mineral density as estimated by heel quantitative ultrasound. The specific gu…

## Sheet: Supplementary Table 8
Supplementary Table 8. The overall Mendelian Randomization results between gut microbiota taxa and blood metabolites.
		Bifidobacterium adolescentis						Bifidobacterium						Bifidobacteriaceae
Metabolites	MR analysis	SNP	Estimate	Std Error	95% CI Lower	95% CI Upper	P-value	SNP	Estimate	Std Error	95% CI Lower	95% CI Upper	P-value	SNP	Estimate	Std Error	95% CI Lower	95% CI Upper	P-value
glutamine	Inverse-variance weighted	4	0.00990928	0.00436959	0.00134505	0.0184735	0.0233424	3	0.010096	0.00524358	-0.000181195	0.0203733	0.0541783	3	0.0100165	0.00519502	-0.000165512	0.0201986	0.0538422
glutamine	Weighted median	4	0.0103169	0.00511187	0.000297851	0.020336	0.0435673	3	0.00940132	0.00631463	-0.00297513	0.0217778	0.136536	3	0.0093612	0.00624153	-0.00287198	0.0215944	0.13366
glutamine	MR-Egger	4	-0.0186977	0.0695599	-0.155033	0.117637	0.788084	3	-0.0528038	0.0829456	-0.215374	0.109766	0.52438	3	-0.0538333	0.0859186	-0.222231	0.114564	0.530947
glutamine	MR-Egger intercept	4	0.00402223	0.00976103	-0.015109	0.0231535	0.680288	3	0.00857379	0.0112836	-0.0135416	0.0306892	0.447346	3	0.00878314	0.0117973	-0.0143391	0.0319054	0.456571
tryptophan	Inverse-variance weighted	4	-0.012358	0.00519522	-0.0225405	-0.00217556	0.0173726	3	-0.0114528	0.00613029	-0.0234679	0.000562363	0.0617302	3	-0.0113571	0.00607672	-0.0232672	0.00055306	0.0616296
tryptophan	Weighted median	4	-0.0123455	0.00602602	-0.0241562	-0.000534685	0.0404921	3	-0.0110451	0.00708253	-0.0249266	0.0028364	0.118881	3	-0.0109902	0.00702812	-0.0247651	0.00278468	0.117878
tryptophan	MR-Egger	4	-0.00223736	0.0770257	-0.153205	0.14873	0.976827	3	-0.00308779	0.0887193	-0.176974	0.170799	0.972236	3	-0.00382616	0.0918003	-0.183751	0.176099	0.966754
tryptophan	MR-Egger intercept	4	-0.00143803	0.0109196	-0.02284	0.0199639	0.895227	3	-0.00115638	0.0122353	-0.0251371	0.0228243	0.924702	3	-0.00105005	0.0127718	-0.0260823	0.0239822	0.934475
histidine	Inverse-variance weighted	4	-0.005077	0.00422808	-0.0133639	0.00320988	0.229836	3	-0.00547342	0.00501518	-0.015303	0.00435615	0.27511	3	-0.00542955	0.00497135	-0.0151732	0.00431411	0.274759
histidine	Weighted median	4	-0.00548463	0.00480638	-0.014905	0.00393569	0.253822	3	-0.00569693	0.00571432	-0.0168968	0.00550294	0.318786	3	-0.00566337	0.00567042	-0.0167772	0.00545046	0.317913
histidine	MR-Egger	4	0.0042604	0.0617834	-0.116833	0.125354	0.945024	3	0.0126788	0.0713727	-0.127209	0.152567	0.859004	3	0.0130837	0.0738942	-0.131746	0.157914	0.859461
histidine	MR-Egger intercept	4	-0.00132817	0.00876759	-0.0185123	0.015856	0.879592	3	-0.00251385	0.00985976	-0.0218386	0.0168109	0.798754	3	-0.00258592	0.0102981	-0.0227698	0.017598	0.801732
leucine	Inverse-variance weighted	4	-0.00586373	0.00519522	-0.0160462	0.00431873	0.259034	3	-0.0047618	0.00613029	-0.016777	0.00725335	0.437297	3	-0.00471965	0.00607672	-0.0166298	0.0071905	0.437349
leucine	Weighted median	4	-0.00691815	0.0059526	-0.018585	0.00474874	0.245152	3	-0.00622718	0.00703363	-0.0200129	0.00755849	0.375971	3	-0.00614608	0.00697878	-0.0198242	0.00753208	0.37849
leucine	MR-Egger	4	-0.00983234	0.0770257	-0.1608	0.141135	0.898426	3	-0.0205144	0.0887193	-0.194401	0.153372	0.817137	3	-0.0218283	0.0918003	-0.201753	0.158097	0.812051
leucine	MR-Egger intercept	4	0.000563895	0.0109196	-0.0208381	0.0219658	0.958815	3	0.00217765	0.0122353	-0.021803	0.0261583	0.858738	3	0.00238549	0.0127718	-0.0226467	0.0274177	0.851835
cholesterol	Inverse-variance weighted	4	0.0224296	0.00598977	0.0106898	0.0341693	0.000180651	3	0.0237905	0.00710483	0.00986527	0.0377157	0.000812522	3	0.023608	0.00704274	0.00980445	0.0374115	0.000802012
cholesterol	Weighted median	4	0.0229468	0.00731374	0.00861211	0.0372814	0.00170402	3	0.0280007	0.00885218	0.0106507	0.0453506	0.00156078	3	0.0278892	0.00878296	0.0106749	0.0451035	0.00149642
cholesterol	MR-Egger	4	-0.0894325	0.0875265	-0.260981	0.0821163	0.306887	3	-0.105285	0.101111	-0.303459	0.0928898	0.297748	3	-0.10934	0.104683	-0.314515	0.0958361	0.296264
cholesterol	MR-Egger intercept	4	0.0159115	0.0124208	-0.00843276	0.0402557	0.20018	3	0.0178753	0.013968	-0.00950152	0.045252	0.20064	3	0.01857	0.014589	-0.0100238	0.0471639	0.20306
phenylalanine	Inverse-variance weighted	4	-0.000869759	0.00422808	-0.00915663	0.00741712	0.837017	3	-0.000934753	0.00501518	-0.0107643	0.00889481	0.852143	3	-0.000918379	0.00497135	-0.010662	0.00882528	0.853437
phenylalanine	Weighted median	4	-7.97509e-05	0.00484934	-0.00958428	0.00942478	0.986879	3	0.000558967	0.00578837	-0.010786	0.011904	0.92307	3	0.000594392	0.00574565	-0.0106669	0.0118557	0.917605
phenylalanine	MR-Egger	4	-0.0356022	0.0617834	-0.156695	0.0854911	0.564452	3	-0.043071	0.0713727	-0.182959	0.0968169	0.546198	3	-0.0447299	0.0738942	-0.18956	0.1001	0.544964
phenylalanine	MR-Egger intercept	4	0.00494041	0.00876759	-0.0122438	0.0221246	0.573105	3	0.00583533	0.00985976	-0.0134895	0.0251601	0.553963	3	0.00611956	0.0102981	-0.0140643	0.0263035	0.552351
creatinine	Inverse-variance weighted	4	-0.00548291	0.00598977	-0.0172226	0.00625683	0.359993	3	-0.00707206	0.00710483	-0.0209973	0.00685316	0.319548	3	-0.00701833	0.00704274	-0.0208218	0.00678519	0.318991
creatinine	Weighted median	4	-0.00528758	0.00686522	-0.0187432	0.00816801	0.441182	3	-0.00760424	0.00811076	-0.023501	0.00829255	0.348476	3	-0.00756969	0.00804798	-0.0233434	0.00820407	0.346926
creatinine	MR-Egger	4	0.0301735	0.0875265	-0.141375	0.201722	0.730293	3	0.0301433	0.101111	-0.168031	0.228318	0.765611	3	0.0311375	0.104683	-0.174038	0.236313	0.766128
creatinine	MR-Egger intercept	4	-0.00507184	0.0124208	-0.0294161	0.0192724	0.683027	3	-0.00515385	0.013968	-0.0325306	0.0222229	0.712146	3	-0.00532957	0.014589	-0.0339234	0.0232643	0.714876
lactate	Inverse-variance weighted	4	-0.0179257	0.00810381	-0.0338089	-0.00204255	0.0269658	3	-0.0213278	0.00961242	-0.0401678	-0.00248784	0.0265017	3	-0.0211009	0.00952841	-0.0397762	-0.00242554	0.0267928
lactate	Weighted median	4	-0.0103669	0.0101273	-0.030216	0.00948216	0.305994	3	-0.0149067	0.0119526	-0.0383335	0.00851999	0.212342	3	-0.014598	0.0118766	-0.0378757	0.00867974	0.21902
lactate	MR-Egger	4	-0.187334	0.118418	-0.419429	0.0447614	0.113657	3	-0.224678	0.136798	-0.492796	0.0434409	0.100505	3	-0.233081	0.141631	-0.510671	0.0445101	0.0998265
lactate	MR-Egger intercept	4	0.024097	0.0168046	-0.00883935	0.0570333	0.151585	3	0.0281613	0.0188979	-0.00887784	0.0652005	0.136176	3	0.0296092	0.019738	-0.00907664	0.068295	0.133586
3-hydroxybutyrate (BHBA)	Inverse-variance weighted	4	0.0477105	0.0263867	-0.00400658	0.0994275	0.0705873	3	0.0429126	0.0320196	-0.0198445	0.10567	0.18018	3	0.042575	0.0317408	-0.0196357	0.104786	0.179811
3-hydroxybutyrate (BHBA)	Weighted median	4	0.0535785	0.0303531	-0.00591246	0.113069	0.0775344	3	0.0479209	0.0369923	-0.0245827	0.120424	0.195173	3	0.0476796	0.0366943	-0.02424	0.119599	0.193816
3-hydroxybutyrate (BHBA)	MR-Egger	4	-0.123963	0.391832	-0.89194	0.644014	0.751724	3	-0.145619	0.462956	-1.053	0.761757	0.753109	3	-0.150968	0.478966	-1.08972	0.787787	0.752613
3-hydroxybutyrate (BHBA)	MR-Egger intercept	4	0.0243483	0.0554472	-0.0843262	0.133023	0.66057	3	0.0260778	0.0638828	-0.0991301	0.151286	0.683117	3	0.0270008	0.0666725	-0.103675	0.157676	0.685495
arabinose	Inverse-variance weighted	4	-0.0393977	0.0135789	-0.0660118	-0.0127836	0.003715	3	-0.0495768	0.0163348	-0.0815925	-0.0175611	0.00240506	3	-0.0491076	0.0161858	-0.0808312	-0.0173841	0.00241337
arabinose	Weighted median	4	-0.0324319	0.0163731	-0.0645227	-0.000341208	0.0476133	3	-0.0528882	0.0209389	-0.0939277	-0.0118486	0.0115426	3	-0.0521031	0.0207614	-0.0927948	-0.0114115	0.0120863
arabinose	MR-Egger	4	-0.201096	0.20662	-0.606064	0.203871	0.330421	3	-0.226917	0.243616	-0.704395	0.250561	0.351619	3	-0.239464	0.252398	-0.734154	0.255226	0.342744
arabinose	MR-Egger intercept	4	0.022831	0.0291106	-0.0342247	0.0798868	0.432873	3	0.0243201	0.0333338	-0.041013	0.0896532	0.46564	3	0.0263405	0.0348535	-0.0419711	0.0946521	0.449799
fructose	Inverse-variance weighted	4	0.0119114	0.0140086	-0.0155449	0.0393677	0.395163	3	0.0098347	0.0177359	-0.0249269	0.0445963	0.57923	3	0.0097476	0.0175809	-0.0247103	0.0442055	0.579275
fructose	Weighted median	4	0.0152075	0.0161666	-0.0164785	0.0468935	0.346873	3	0.0188665	0.0207243	-0.0217524	0.0594853	0.362635	3	0.0185186	0.020538	-0.0217351	0.0587722	0.367229
fructose	MR-Egger	4	0.115148	0.214358	-0.304986	0.535282	0.591147	3	0.101735	0.263946	-0.41559	0.61906	0.699913	3	0.109008	0.272879	-0.425824	0.64384	0.689544
fructose	MR-Egger intercept	4	-0.0145641	0.030176	-0.073708	0.0445798	0.629352	3	-0.0126698	0.0363066	-0.0838295	0.0584899	0.727115	3	-0.0138026	0.0378662	-0.088019	0.0604138	0.715478
mannose	Inverse-variance weighted	4	-0.0172347	0.0086138	-0.0341175	-0.000352011	0.0454107	3	-0.0196645	0.0101467	-0.0395516	0.000222604	0.0526201	3	-0.0194872	0.0100591	-0.0392026	0.00022822	0.0527116
mannose	Weighted median	4	-0.0175763	0.0101631	-0.0374956	0.00234298	0.083733	3	-0.0231943	0.0119889	-0.0466921	0.00030354	0.0530338	3	-0.0228944	0.0118993	-0.0462166	0.000427925	0.0543543
mannose	MR-Egger	4	-0.0734491	0.125697	-0.319812	0.172913	0.558996	3	-0.0985262	0.14434	-0.381428	0.184375	0.494861	3	-0.103905	0.149364	-0.396652	0.188842	0.486648
mannose	MR-Egger intercept	4	0.00800829	0.0178647	-0.0270059	0.0430225	0.653956	3	0.0109401	0.019974	-0.0282082	0.0500883	0.583888	3	0.0118104	0.0208491	-0.0290532	0.052674	0.571075
pyruvate	Inverse-variance weighted	4	0.0044973	0.0147128	-0.0243393	0.0333339	0.759855	3	0.00151056	0.0174206	-0.0326332	0.0356544	0.930901	3	0.00149297	0.0172684	-0.0323524	0.0353384	0.931103
pyruvate	Weighted median	4	0.00478518	0.0167193	-0.0279841	0.0375544	0.77472	3	-0.000769678	0.0199155	-0.0398034	0.038264	0.969172	3	-0.000808937	0.0197613	-0.0395403	0.0379224	0.967347
pyruvate	MR-Egger	4	-0.0298381	0.216047	-0.453282	0.393605	0.890154	3	-0.0153398	0.249323	-0.504004	0.473324	0.95094	3	-0.0176337	0.258079	-0.523459	0.488192	0.945526
pyruvate	MR-Egger intercept	4	0.00488214	0.0306483	-0.0551874	0.0649517	0.873436	3	0.00233213	0.0344225	-0.0651347	0.069799	0.945984	3	0.00266997	0.0359455	-0.067782	0.0731219	0.940789
uridine	Inverse-variance weighted	4	0.00154715	0.00598977	-0.0101926	0.0132869	0.796176	3	0.00344892	0.00710483	-0.0104763	0.0173741	0.627369	3	0.00341674	0.00704274	-0.0103868	0.0172203	0.627575
uridine	Weighted median	4	0.00146332	0.00680427	-0.0118728	0.0147994	0.829721	3	0.00330074	0.00808615	-0.0125478	0.0191493	0.683129	3	0.00325571	0.0080234	-0.0124699	0.0189813	0.684906
uridine	MR-Egger	4	0.0301281	0.0875265	-0.141421	0.201677	0.730683	3	0.0160352	0.101111	-0.182139	0.21421	0.873992	3	0.0167362	0.104683	-0.18844	0.221912	0.87298
uridine	MR-Egger intercept	4	-0.00406541	0.0124208	-0.0284097	0.0202788	0.743435	3	-0.00174304	0.013968	-0.0291198	0.0256337	0.900692	3	-0.00186045	0.014589	-0.0304543	0.0267334	0.898525
linoleate (18:2n6)	Inverse-variance weighted	4	0.0181669	0.00888898	0.00074486	0.035589	0.0409773	3	0.0198682	0.0107293	-0.00116081	0.0408973	0.0640583	3	0.0197028	0.0106304	-0.00113237	0.040538	0.063819
linoleate (18:2n6)	Weighted median	4	0.0194903	0.01023	-0.000560037	0.0395407	0.0567516	3	0.0240705	0.0128729	-0.00115999	0.049301	0.0615042	3	0.0238619	0.0127296	-0.00108774	0.0488116	0.0608595
linoleate (18:2n6)	MR-Egger	4	-0.041848	0.136855	-0.310078	0.226382	0.759769	3	-0.0806422	0.162457	-0.399051	0.237767	0.619618	3	-0.0839007	0.168349	-0.413859	0.246058	0.618221
linoleate (18:2n6)	MR-Egger intercept	4	0.00845909	0.0192489	-0.029268	0.0461862	0.660329	3	0.0137511	0.0221776	-0.0297161	0.0572183	0.535229	3	0.0143034	0.0231958	-0.0311595	0.0597664	0.537473
allantoin	Inverse-variance weighted	4	0.00572394	0.0166724	-0.0269533	0.0384012	0.731358	3	0.00321387	0.0199684	-0.0359235	0.0423512	0.872135	3	0.00319446	0.0197877	-0.0355887	0.0419776	0.871749
allantoin	Weighted median	4	0.00806143	0.0189633	-0.029106	0.0452289	0.670759	3	0.00250985	0.0233797	-0.0433136	0.0483333	0.91451	3	0.00251437	0.0231833	-0.042924	0.0479527	0.913634
allantoin	MR-Egger	4	-0.0859134	0.25293	-0.581647	0.409821	0.734103	3	-0.0856335	0.296697	-0.667148	0.495881	0.77287	3	-0.0905297	0.307296	-0.692819	0.511759	0.768299
allantoin	MR-Egger intercept	4	0.0129516	0.0356701	-0.0569606	0.0828638	0.716536	3	0.0121996	0.0406469	-0.0674668	0.0918659	0.764074	3	0.0129843	0.0424835	-0.0702818	0.0962503	0.759886
arachidonate (20:4n6)	Inverse-variance weighted	4	0.00789503	0.00880849	-0.00936929	0.0251594	0.370094	3	0.01092	0.0104483	-0.00955824	0.0313983	0.295954	3	0.0108252	0.010357	-0.00947408	0.0311245	0.295926
arachidonate (20:4n6)	Weighted median	4	0.0102383	0.0100727	-0.00950387	0.0299804	0.309422	3	0.0117998	0.0119586	-0.0116385	0.0352382	0.323777	3	0.0117488	0.0118653	-0.0115067	0.0350043	0.322083
arachidonate (20:4n6)	MR-Egger	4	0.072064	0.128715	-0.180214	0.324342	0.575568	3	0.0179622	0.148693	-0.273471	0.309395	0.903849	3	0.0190711	0.153946	-0.282658	0.3208	0.901409
arachidonate (20:4n6)	MR-Egger intercept	4	-0.00912752	0.0182658	-0.0449279	0.0266728	0.617283	3	-0.000975257	0.0205412	-0.0412352	0.0392847	0.962132	3	-0.00115178	0.0214544	-0.0432016	0.040898	0.957186
deoxycholate	Inverse-variance weighted	4	-0.0723359	0.026034	-0.123362	-0.0213102	0.00546079	3	-0.0761045	0.0310065	-0.136876	-0.015333	0.0141091	3	-0.0754315	0.0307312	-0.135663	-0.0151995	0.0141057
deoxycholate	Weighted median	4	-0.07919	0.0305701	-0.139106	-0.0192737	0.00958534	3	-0.0904915	0.0373632	-0.163722	-0.017261	0.0154378	3	-0.0917882	0.0370835	-0.16447	-0.0191059	0.013317
deoxycholate	MR-Egger	4	-0.215824	0.386682	-0.973707	0.542059	0.576746	3	-0.201028	0.449266	-1.08157	0.679519	0.654545	3	-0.214653	0.465191	-1.12641	0.697105	0.644491
deoxycholate	MR-Egger intercept	4	0.0203501	0.0547164	-0.0868921	0.127592	0.709953	3	0.0172328	0.0618273	-0.103946	0.138412	0.780456	3	0.0193733	0.0645923	-0.107225	0.145972	0.764228
margarate (17:0)	Inverse-variance weighted	4	0.0178536	0.0110814	-0.0038655	0.0395726	0.10715	3	0.0182652	0.0130733	-0.00735808	0.0438884	0.162374	3	0.0181362	0.0129602	-0.00726522	0.0435377	0.161698
margarate (17:0)	Weighted median	4	0.0199735	0.0128228	-0.00515866	0.0451056	0.119314	3	0.0175772	0.0152859	-0.0123826	0.047537	0.250187	3	0.0175012	0.0151708	-0.012233	0.0472354	0.24866
margarate (17:0)	MR-Egger	4	-0.055081	0.161748	-0.372101	0.261939	0.733453	3	-0.104849	0.185981	-0.469364	0.259667	0.572917	3	-0.107687	0.192475	-0.484932	0.269558	0.575832
margarate (17:0)	MR-Egger intercept	4	0.0103867	0.0229806	-0.0346545	0.0554279	0.651286	3	0.0170725	0.0257266	-0.0333507	0.0674957	0.506938	3	0.0175969	0.0268575	-0.0350428	0.0702366	0.512341
inosine	Inverse-variance weighted	4	0.0281905	0.0392889	-0.0488143	0.105195	0.473054	3	0.0201698	0.0465493	-0.0710652	0.111405	0.664798	3	0.0199568	0.0461425	-0.0704808	0.110394	0.665375
inosine	Weighted median	4	0.0266515	0.0445342	-0.0606339	0.113937	0.549539	3	0.026714	0.053013	-0.0771895	0.130617	0.614321	3	0.026476	0.0526033	-0.0766247	0.129577	0.614744
inosine	MR-Egger	4	-0.00518405	0.580741	-1.14342	1.13305	0.992878	3	0.146371	0.669649	-1.16612	1.45886	0.826978	3	0.149017	0.693044	-1.20932	1.50736	0.829754
inosine	MR-Egger intercept	4	0.00474415	0.0823625	-0.156683	0.166172	0.954067	3	-0.017457	0.0924062	-0.19857	0.163656	0.850159	3	-0.0180062	0.0964775	-0.207099	0.171086	0.851946
isoleucine	Inverse-variance weighted	4	-0.0121854	0.00563743	-0.0232346	-0.00113628	0.030655	3	-0.0100457	0.0066869	-0.0231518	0.00306036	0.13302	3	-0.0099693	0.00662846	-0.0229608	0.00302225	0.132578
isoleucine	Weighted median	4	-0.0124159	0.00665701	-0.0254634	0.000631617	0.0621696	3	-0.00910796	0.00792148	-0.0246338	0.00641786	0.250235	3	-0.00907874	0.00786026	-0.0244846	0.00632709	0.248083
isoleucine	MR-Egger	4	0.025097	0.0823779	-0.136361	0.186555	0.760628	3	0.0128638	0.0951636	-0.173653	0.199381	0.892473	3	0.0118579	0.0985256	-0.181249	0.204964	0.904203
isoleucine	MR-Egger intercept	4	-0.00530312	0.0116901	-0.0282154	0.0176091	0.650087	3	-0.00317267	0.0131464	-0.028939	0.0225937	0.809296	3	-0.0030488	0.0137308	-0.0299607	0.0238631	0.824282
threonine	Inverse-variance weighted	4	0.0139584	0.00845615	-0.00261536	0.0305321	0.0988042	3	0.0143342	0.0100304	-0.00532495	0.0339933	0.152981	3	0.0142313	0.00994269	-0.00525606	0.0337186	0.152336
threonine	Weighted median	4	0.0133151	0.00974601	-0.00578672	0.0324169	0.171873	3	0.0120296	0.0118543	-0.0112044	0.0352636	0.310206	3	0.0119622	0.0117636	-0.0110941	0.0350184	0.309211
threonine	MR-Egger	4	-0.0593424	0.123567	-0.301529	0.182844	0.631053	3	-0.0705407	0.142745	-0.350317	0.209235	0.621185	3	-0.0720064	0.147788	-0.361666	0.217654	0.626098
threonine	MR-Egger intercept	4	0.0104265	0.0175352	-0.0239419	0.0447948	0.55211	3	0.0117541	0.0197195	-0.0268955	0.0504036	0.551133	3	0.0120456	0.0205962	-0.0283222	0.0524134	0.558651
tyrosine	Inverse-variance weighted	4	0.012159	0.00563743	0.00110981	0.0232081	0.0310191	3	0.0118375	0.0066869	-0.00126859	0.0249436	0.0766853	3	0.0117439	0.00662846	-0.00124766	0.0247354	0.0764385
tyrosine	Weighted median	4	0.0141005	0.0065366	0.00128897	0.026912	0.0309935	3	0.0137466	0.00780205	-0.00154516	0.0290383	0.078083	3	0.0135997	0.00774039	-0.00157118	0.0287706	0.0789212
tyrosine	MR-Egger	4	-0.0307485	0.0823779	-0.192206	0.130709	0.708954	3	-0.0399636	0.0951636	-0.226481	0.146554	0.674525	3	-0.0415861	0.0985256	-0.234693	0.15152	0.672963
tyrosine	MR-Egger intercept	4	0.00610324	0.0116901	-0.016809	0.0290155	0.601611	3	0.00717377	0.0131464	-0.0185926	0.0329401	0.585282	3	0.00744909	0.0137308	-0.0194628	0.034361	0.587467
lysine	Inverse-variance weighted	4	0.0167904	0.00598977	0.00505067	0.0285302	0.00506015	3	0.0174451	0.00710483	0.00351989	0.0313703	0.0140733	3	0.0172833	0.00704274	0.0034798	0.0310868	0.0141253
lysine	Weighted median	4	0.0158628	0.00697577	0.00219051	0.029535	0.0229671	3	0.0164169	0.00835428	4.27845e-05	0.032791	0.0494044	3	0.0161947	0.00828934	-5.20678e-05	0.0324416	0.0507388
lysine	MR-Egger	4	0.0574974	0.0875265	-0.114051	0.229046	0.511236	3	0.0720339	0.101111	-0.126141	0.270209	0.476203	3	0.0750585	0.104683	-0.130117	0.280234	0.473371
lysine	MR-Egger intercept	4	-0.00579025	0.0124208	-0.0301345	0.018554	0.64109	3	-0.00755985	0.013968	-0.0349366	0.0198169	0.588352	3	-0.00806999	0.014589	-0.0366639	0.0205239	0.580156
methionine	Inverse-variance weighted	4	-0.00263355	0.00519522	-0.012816	0.0075489	0.612213	3	-0.00260585	0.00613029	-0.014621	0.00940931	0.67078	3	-0.00258714	0.00607672	-0.0144973	0.00932301	0.670293
methionine	Weighted median	4	-0.00293773	0.00588811	-0.0144782	0.00860276	0.617832	3	-0.00330956	0.00698637	-0.0170026	0.0103835	0.635702	3	-0.00330128	0.00693143	-0.0168866	0.0102841	0.633878
methionine	MR-Egger	4	0.00813923	0.0770257	-0.142828	0.159107	0.915845	3	0.0192422	0.0887193	-0.154644	0.193129	0.828295	3	0.0199756	0.0918003	-0.15995	0.199901	0.827742
methionine	MR-Egger intercept	4	-0.00153069	0.0109196	-0.0229326	0.0198713	0.888519	3	-0.00302028	0.0122353	-0.027001	0.0209604	0.805024	3	-0.00314595	0.0127718	-0.0281782	0.0218863	0.805434
malate	Inverse-variance weighted	4	-0.0152482	0.00992459	-0.0347001	0.00420361	0.124438	3	-0.0196078	0.0119477	-0.0430248	0.00380927	0.100769	3	-0.01942	0.0118374	-0.0426209	0.00378086	0.100888
malate	Weighted median	4	-0.0169574	0.011497	-0.0394911	0.00557633	0.140229	3	-0.0194486	0.0138794	-0.0466516	0.0077545	0.161137	3	-0.0192582	0.0137394	-0.0461868	0.00767046	0.161011
malate	MR-Egger	4	-0.0311121	0.154786	-0.334488	0.272263	0.840698	3	-0.0510547	0.183965	-0.411619	0.309509	0.781377	3	-0.0526618	0.190598	-0.426227	0.320904	0.78232
malate	MR-Egger intercept	4	0.00223391	0.0217517	-0.0403987	0.0448666	0.918201	3	0.00429618	0.0250796	-0.0448588	0.0534512	0.863986	3	0.00458286	0.026226	-0.0468192	0.0559849	0.86128
palmitate (16:0)	Inverse-variance weighted	4	0.000305874	0.0078206	-0.0150222	0.015634	0.968802	3	0.00123715	0.00919449	-0.0167837	0.019258	0.892965	3	0.0012454	0.00911413	-0.016618	0.0191088	0.891312
palmitate (16:0)	Weighted median	4	0.00193148	0.00900265	-0.0157134	0.0195763	0.830121	3	0.00343243	0.0106842	-0.0175082	0.0243731	0.748012	3	0.00348167	0.0106045	-0.0173028	0.0242661	0.74267
palmitate (16:0)	MR-Egger	4	-0.047132	0.115357	-0.273228	0.178965	0.682853	3	-0.0906789	0.13085	-0.34714	0.165782	0.48831	3	-0.0939211	0.135473	-0.359443	0.171601	0.488131
palmitate (16:0)	MR-Egger intercept	4	0.00675998	0.0164008	-0.0253851	0.038905	0.680213	3	0.0127292	0.0180762	-0.0226996	0.0481579	0.481312	3	0.0132928	0.0188798	-0.023711	0.0502966	0.481388
nonadecanoate (19:0)	Inverse-variance weighted	4	-0.000319755	0.00939542	-0.0187344	0.0180949	0.972851	3	-0.00105082	0.0112657	-0.0231313	0.0210296	0.925684	3	-0.00102111	0.0111612	-0.0228967	0.0208545	0.927105
nonadecanoate (19:0)	Weighted median	4	1.26254e-06	0.0107462	-0.0210608	0.0210634	0.999906	3	-0.00178392	0.013308	-0.0278671	0.0242993	0.893364	3	-0.00170505	0.0131714	-0.0275206	0.0241105	0.897001
nonadecanoate (19:0)	MR-Egger	4	-0.0716741	0.146891	-0.359575	0.216226	0.625591	3	-0.0873166	0.172413	-0.425239	0.250606	0.612548	3	-0.0895239	0.178694	-0.439757	0.260709	0.616377
nonadecanoate (19:0)	MR-Egger intercept	4	0.0100624	0.0206721	-0.0304542	0.050579	0.626427	3	0.0117841	0.0235016	-0.0342781	0.0578463	0.616078	3	0.0122006	0.0245858	-0.0359867	0.060388	0.619721
stearate (18:0)	Inverse-variance weighted	4	0.00507612	0.00732515	-0.00928092	0.0194331	0.488328	3	0.00540927	0.00845017	-0.0111528	0.0219713	0.522083	3	0.00537928	0.00837714	-0.0110396	0.0217982	0.520784
stearate (18:0)	Weighted median	4	0.00725636	0.0086795	-0.00975515	0.0242679	0.403135	3	0.0102561	0.00979639	-0.00894449	0.0294566	0.295134	3	0.0101311	0.00970729	-0.00889481	0.0291571	0.296642
stearate (18:0)	MR-Egger	4	-0.0788832	0.113983	-0.302287	0.14452	0.4889	3	-0.107742	0.129272	-0.36111	0.145627	0.404591	3	-0.111838	0.133464	-0.373422	0.149746	0.40205
stearate (18:0)	MR-Egger intercept	4	0.0119054	0.0161294	-0.0197077	0.0435186	0.460442	3	0.0155818	0.0177637	-0.0192345	0.050398	0.380395	3	0.0162798	0.0184996	-0.0199788	0.0525383	0.378856
oleate (18:1n9)	Inverse-variance weighted	4	-0.00248591	0.00881614	-0.0197652	0.0147934	0.777964	3	-0.00282127	0.0106091	-0.0236147	0.0179721	0.790293	3	-0.00276773	0.0105122	-0.0233712	0.0178358	0.792329
oleate (18:1n9)	Weighted median	4	-0.000147905	0.0101478	-0.0200372	0.0197414	0.988371	3	-0.00231505	0.0129614	-0.027719	0.0230889	0.858244	3	-0.00221006	0.012847	-0.0273898	0.0229696	0.863415
oleate (18:1n9)	MR-Egger	4	-0.0738528	0.134303	-0.337082	0.189376	0.58239	3	-0.127887	0.158452	-0.438448	0.182674	0.419608	3	-0.131665	0.164168	-0.453428	0.190098	0.422544
oleate (18:1n9)	MR-Egger intercept	4	0.0100749	0.0189187	-0.027005	0.0471548	0.594355	3	0.0171472	0.0216759	-0.0253368	0.0596312	0.428902	3	0.017832	0.0226648	-0.0265902	0.0622541	0.431416
pentadecanoate (15:0)	Inverse-variance weighted	4	0.0110436	0.00880849	-0.00622068	0.028308	0.209933	3	0.00995051	0.0104483	-0.0105278	0.0304288	0.340915	3	0.00989614	0.010357	-0.0104031	0.0301954	0.339322
pentadecanoate (15:0)	Weighted median	4	0.0135847	0.0103335	-0.00666863	0.0338381	0.188636	3	0.00996872	0.0124498	-0.0144324	0.0343698	0.423296	3	0.00997376	0.0123579	-0.0142473	0.0341948	0.419623
pentadecanoate (15:0)	MR-Egger	4	-0.0812584	0.128715	-0.333536	0.171019	0.527843	3	-0.129647	0.148693	-0.42108	0.161786	0.383258	3	-0.133472	0.153946	-0.435202	0.168257	0.385938
pentadecanoate (15:0)	MR-Egger intercept	4	0.0131292	0.0182658	-0.0226711	0.0489296	0.472273	3	0.0193324	0.0205412	-0.0209275	0.0595924	0.346625	3	0.0200256	0.0214544	-0.0220242	0.0620754	0.350611
myristate (14:0)	Inverse-variance weighted	4	-0.00527427	0.00924466	-0.0233935	0.0128449	0.568325	3	-0.00614485	0.011152	-0.0280024	0.0157127	0.581628	3	-0.00605358	0.0110494	-0.02771	0.0156028	0.583784
myristate (14:0)	Weighted median	4	-0.00315897	0.0106842	-0.0240996	0.0177816	0.767484	3	-0.00718556	0.0137506	-0.0341363	0.0197652	0.601279	3	-0.00701118	0.0136015	-0.0336697	0.0196473	0.606225
myristate (14:0)	MR-Egger	4	-0.105773	0.14203	-0.384146	0.172601	0.45644	3	-0.155949	0.168389	-0.485986	0.174088	0.354382	3	-0.160095	0.17449	-0.50209	0.1819	0.35888
myristate (14:0)	MR-Egger intercept	4	0.0141695	0.0199827	-0.0249958	0.0533349	0.478269	3	0.0205037	0.0229968	-0.0245692	0.0655765	0.372613	3	0.0212753	0.0240513	-0.0258643	0.068415	0.376382
pipecolate	Inverse-variance weighted	4	-0.00985164	0.014201	-0.0376852	0.0179819	0.487853	3	-0.0157396	0.0169103	-0.0488832	0.0174041	0.351974	3	-0.0155907	0.0167583	-0.0484363	0.0172548	0.3522
pipecolate	Weighted median	4	-0.00955939	0.0164181	-0.0417383	0.0226195	0.560401	3	-0.0180385	0.0198928	-0.0570276	0.0209506	0.36452	3	-0.017781	0.0197441	-0.0564788	0.0209168	0.367817
pipecolate	MR-Egger	4	-0.0539404	0.213901	-0.473179	0.365298	0.800906	3	-0.0933942	0.247562	-0.578607	0.391819	0.705984	3	-0.0986908	0.256418	-0.601261	0.403879	0.700325
pipecolate	MR-Egger intercept	4	0.00624705	0.0302413	-0.0530248	0.0655189	0.836343	3	0.0106849	0.0339838	-0.0559221	0.0772919	0.753209	3	0.0115356	0.0355189	-0.0580801	0.0811514	0.745352
ornithine	Inverse-variance weighted	4	0.0161363	0.0086138	-0.000746419	0.0330191	0.0610256	3	0.0188641	0.0101467	-0.00102301	0.0387512	0.0630071	3	0.0187088	0.0100591	-0.00100664	0.0384242	0.0629009
ornithine	Weighted median	4	0.0157268	0.00986462	-0.00360753	0.0350611	0.110878	3	0.0194664	0.0116549	-0.00337679	0.0423096	0.0948732	3	0.0193349	0.0115602	-0.00332274	0.0419926	0.0944186
ornithine	MR-Egger	4	0.0187679	0.125697	-0.227595	0.26513	0.881309	3	-0.0174306	0.14434	-0.300332	0.265471	0.903881	3	-0.0180098	0.149364	-0.310757	0.274738	0.904026
ornithine	MR-Egger intercept	4	-0.000374896	0.0178647	-0.0353891	0.0346393	0.983257	3	0.00503496	0.019974	-0.0341133	0.0441833	0.800982	3	0.00513708	0.0208491	-0.0357265	0.0460006	0.805378
5-oxoproline	Inverse-variance weighted	4	0.0228452	0.00579981	0.0114778	0.0342126	8.18368e-05	3	0.0231967	0.00728866	0.00891115	0.0374822	0.00145975	3	0.0229956	0.00722497	0.00883492	0.0371563	0.00145861
5-oxoproline	Weighted median	4	0.0224813	0.00683338	0.00908809	0.0358745	0.00100216	3	0.0231966	0.00850807	0.0065211	0.0398721	0.00640247	3	0.0230075	0.00842715	0.00649055	0.0395244	0.00633038
5-oxoproline	MR-Egger	4	0.0216741	0.0902591	-0.15523	0.198579	0.810228	3	0.0146159	0.11081	-0.202567	0.231799	0.895063	3	0.015158	0.114494	-0.209245	0.239561	0.894674
5-oxoproline	MR-Egger intercept	4	0.000165055	0.0126952	-0.0247171	0.0250472	0.989627	3	0.00118074	0.0152147	-0.0286396	0.031001	0.938142	3	0.0010878	0.0158591	-0.0299955	0.0321711	0.945315
pantothenate	Inverse-variance weighted	4	0.00320003	0.00966967	-0.0157522	0.0221522	0.740694	3	0.00406266	0.0124216	-0.0202832	0.0284085	0.743619	3	0.00404679	0.012313	-0.0200863	0.0281799	0.742413
pantothenate	Weighted median	4	0.0041437	0.0110402	-0.0174947	0.0257821	0.707416	3	0.00410013	0.0143001	-0.0239275	0.0321278	0.774326	3	0.00411585	0.0141851	-0.0236865	0.0319182	0.771699
pantothenate	MR-Egger	4	-0.0252667	0.149722	-0.318717	0.268183	0.865987	3	-0.0908481	0.187083	-0.457524	0.275828	0.627249	3	-0.0932463	0.19335	-0.472206	0.285714	0.629617
pantothenate	MR-Egger intercept	4	0.0040092	0.0210425	-0.0372334	0.0452518	0.848895	3	0.0130707	0.0257074	-0.0373149	0.0634563	0.611145	3	0.0135145	0.0268028	-0.0390181	0.0660471	0.614108
4-acetamidobutanoate	Inverse-variance weighted	4	-0.00407302	0.00680698	-0.0174145	0.00926842	0.549601	3	-0.00691455	0.00900563	-0.0245653	0.0107361	0.442604	3	-0.00686282	0.00892694	-0.0243593	0.0106337	0.442026
4-acetamidobutanoate	Weighted median	4	-0.00394911	0.00781955	-0.0192751	0.0113769	0.613538	3	-0.00562573	0.010125	-0.0254704	0.014219	0.578466	3	-0.00560006	0.0100397	-0.0252775	0.0140774	0.576986
4-acetamidobutanoate	MR-Egger	4	0.0129057	0.108124	-0.199013	0.224824	0.90499	3	0.0101439	0.13936	-0.262997	0.283285	0.941974	3	0.00895439	0.143931	-0.273145	0.291053	0.950393
4-acetamidobutanoate	MR-Egger intercept	4	-0.00238346	0.0151482	-0.0320734	0.0273065	0.874975	3	-0.00234383	0.0191081	-0.0397951	0.0351074	0.902375	3	-0.00219208	0.0199087	-0.0412125	0.0368283	0.912325
alpha-tocopherol	Inverse-variance weighted	4	0.0047071	0.0112114	-0.0172668	0.026681	0.674595	3	0.00336007	0.0138912	-0.0238662	0.0305864	0.80887	3	0.00334613	0.0137708	-0.0236442	0.0303365	0.808015
alpha-tocopherol	Weighted median	4	0.00711918	0.0128001	-0.0179685	0.0322069	0.578086	3	0.005696	0.0160108	-0.0256846	0.0370766	0.72202	3	0.00566591	0.0158929	-0.0254837	0.0368155	0.721463
alpha-tocopherol	MR-Egger	4	-0.0819692	0.167787	-0.410826	0.246888	0.625174	3	-0.0958875	0.202169	-0.492131	0.300356	0.63529	3	-0.100109	0.209069	-0.509877	0.309658	0.632057
alpha-tocopherol	MR-Egger intercept	4	0.0122716	0.0237021	-0.0341838	0.0587269	0.604639	3	0.0137267	0.0278954	-0.0409473	0.0684007	0.622665	3	0.014431	0.0290997	-0.0426034	0.0714654	0.619954
citrate	Inverse-variance weighted	4	0.0201064	0.00680698	0.00676498	0.0334479	0.00313894	3	0.013762	0.00900563	-0.00388869	0.0314127	0.126473	3	0.0136476	0.00892694	-0.00384891	0.031144	0.126312
citrate	Weighted median	4	0.0209833	0.00807266	0.0051612	0.0368054	0.00934122	3	0.0150486	0.0102113	-0.0049653	0.0350624	0.14056	3	0.0148669	0.0101187	-0.00496542	0.0346992	0.141766
citrate	MR-Egger	4	-0.0667281	0.108124	-0.278647	0.14519	0.537138	3	-0.031228	0.13936	-0.304369	0.241913	0.822694	3	-0.0326887	0.143931	-0.314788	0.24941	0.820335
citrate	MR-Egger intercept	4	0.0121898	0.0151482	-0.0175002	0.0418797	0.420993	3	0.00618164	0.0191081	-0.0312696	0.0436329	0.74631	3	0.00642167	0.0199087	-0.0325987	0.0454421	0.747032
glycerate	Inverse-variance weighted	4	-0.0183426	0.00845615	-0.0349164	-0.00176887	0.0300716	3	-0.0209734	0.0100304	-0.0406325	-0.00131427	0.0365286	3	-0.0207635	0.00994269	-0.0402508	-0.00127615	0.0367695
glycerate	Weighted median	4	-0.0133774	0.0100917	-0.0331567	0.00640193	0.184977	3	-0.0170676	0.0119339	-0.0404576	0.0063224	0.152666	3	-0.0168088	0.0118502	-0.0400348	0.00641721	0.156063
glycerate	MR-Egger	4	-0.126236	0.123567	-0.368422	0.115951	0.306972	3	-0.152893	0.142745	-0.432668	0.126883	0.284131	3	-0.158531	0.147788	-0.448191	0.131129	0.283411
glycerate	MR-Egger intercept	4	0.0153469	0.0175352	-0.0190214	0.0497152	0.381462	3	0.0182691	0.0197195	-0.0203805	0.0569187	0.354214	3	0.0192432	0.0205962	-0.0211246	0.059611	0.350144
guanosine	Inverse-variance weighted	4	0.0216947	0.026689	-0.0306149	0.0740043	0.416293	3	0.0130917	0.0315176	-0.0486818	0.0748651	0.677867	3	0.0130502	0.0312411	-0.0481813	0.0742816	0.676149
guanosine	Weighted median	4	0.0131458	0.0310271	-0.0476663	0.0739579	0.671794	3	-0.00063135	0.0373751	-0.0738851	0.0726224	0.986523	3	-0.000596485	0.0371028	-0.0733166	0.0721237	0.987173
guanosine	MR-Egger	4	-0.258881	0.395583	-1.03421	0.516448	0.512836	3	-0.238179	0.454459	-1.1289	0.652545	0.600214	3	-0.241428	0.470382	-1.16336	0.680503	0.60777
guanosine	MR-Egger intercept	4	0.0398792	0.0560975	-0.0700699	0.149828	0.477152	3	0.0347316	0.0626658	-0.0880912	0.157554	0.579418	3	0.0354792	0.0654355	-0.092772	0.16373	0.58768
N-acetylalanine	Inverse-variance weighted	4	-0.0202934	0.00563743	-0.0313425	-0.00924419	0.000318523	3	-0.0225904	0.0066869	-0.0356965	-0.00948428	0.000729352	3	-0.0223902	0.00662846	-0.0353817	-0.00939866	0.000730446
N-acetylalanine	Weighted median	4	-0.0195627	0.00666433	-0.0326246	-0.00650089	0.00333076	3	-0.0227365	0.00790725	-0.0382344	-0.00723855	0.0040352	3	-0.0224514	0.00784349	-0.0378244	-0.00707847	0.00420407
N-acetylalanine	MR-Egger	4	-0.0548936	0.0823779	-0.216351	0.106564	0.505179	3	-0.0416417	0.0951636	-0.228159	0.144876	0.66169	3	-0.0434123	0.0985256	-0.236519	0.149694	0.659488
N-acetylalanine	MR-Egger intercept	4	0.00492161	0.0116901	-0.0179906	0.0278338	0.673751	3	0.00263837	0.0131464	-0.023128	0.0284047	0.840939	3	0.00293636	0.0137308	-0.0239755	0.0298482	0.830663
urate	Inverse-variance weighted	4	-0.0183543	0.00563743	-0.0294034	-0.0073051	0.0011308	3	-0.0167428	0.0066869	-0.0298489	-0.00363668	0.0122862	3	-0.0165953	0.00662846	-0.0295868	-0.00360376	0.0122922
urate	Weighted median	4	-0.0182345	0.00661852	-0.0312065	-0.00526241	0.00586799	3	-0.0171555	0.00776319	-0.0323711	-0.00193997	0.027115	3	-0.0169425	0.00770255	-0.0320393	-0.00184579	0.0278354
urate	MR-Egger	4	-0.0161342	0.0823779	-0.177592	0.145324	0.844723	3	-0.0272847	0.0951636	-0.213802	0.159233	0.774331	3	-0.0285024	0.0985256	-0.221609	0.164604	0.77236
urate	MR-Egger intercept	4	-0.000315788	0.0116901	-0.023228	0.0225964	0.978449	3	0.00145992	0.0131464	-0.0243065	0.0272263	0.911575	3	0.00166317	0.0137308	-0.0252487	0.028575	0.90359
ursodeoxycholate	Inverse-variance weighted	4	-0.0683613	0.0255104	-0.118361	-0.0183618	0.00736788	3	-0.082038	0.0304602	-0.141739	-0.0223371	0.00707519	3	-0.0813312	0.0301876	-0.140498	-0.0221646	0.00705595
ursodeoxycholate	Weighted median	4	-0.0717476	0.0295774	-0.129718	-0.013777	0.0152765	3	-0.0777008	0.0361126	-0.14848	-0.00692133	0.031427	3	-0.0772978	0.0358249	-0.147513	-0.00708223	0.0309547
ursodeoxycholate	MR-Egger	4	-0.0612683	0.381795	-0.809573	0.687037	0.872508	3	-0.00872106	0.445235	-0.881366	0.863924	0.984372	3	-0.0120775	0.461075	-0.915767	0.891612	0.979102
ursodeoxycholate	MR-Egger intercept	4	-0.00100457	0.0539525	-0.10675	0.10474	0.985145	3	-0.0100955	0.0611637	-0.129974	0.109783	0.868899	3	-0.00962022	0.0639116	-0.134885	0.115644	0.880351
arginine	Inverse-variance weighted	4	-6.32809e-05	0.00958297	-0.0188456	0.018719	0.994731	3	0.00275823	0.0112841	-0.0193583	0.0248748	0.806895	3	0.00271245	0.0111855	-0.0192108	0.0246357	0.808395
arginine	Weighted median	4	-0.00397708	0.0111103	-0.0257528	0.0177987	0.72037	3	-0.000956377	0.0130703	-0.0265736	0.0246608	0.941669	3	-0.000992657	0.0129748	-0.0264227	0.0244374	0.939016
arginine	MR-Egger	4	0.0916006	0.141107	-0.184965	0.368166	0.516238	3	0.119891	0.160589	-0.194857	0.434638	0.455323	3	0.124758	0.166262	-0.201109	0.450626	0.453031
arginine	MR-Egger intercept	4	-0.013058	0.0200551	-0.0523654	0.0262493	0.514978	3	-0.0162213	0.0221845	-0.0597021	0.0272594	0.464656	3	-0.0170473	0.0231707	-0.0624611	0.0283665	0.461898
ascorbate (Vitamin C)	Inverse-variance weighted	4	0.00589124	0.0393794	-0.0712909	0.0830734	0.881079	3	0.00291963	0.0466898	-0.0885906	0.0944299	0.950139	3	0.00286443	0.0462817	-0.087846	0.0935749	0.950649
ascorbate (Vitamin C)	Weighted median	4	0.00961221	0.0446688	-0.077937	0.0971614	0.82962	3	0.00379288	0.0533963	-0.100862	0.108448	0.943372	3	0.00367325	0.0529918	-0.100189	0.107535	0.944737
ascorbate (Vitamin C)	MR-Egger	4	0.122851	0.580948	-1.01579	1.26149	0.832523	3	0.222189	0.67015	-1.09128	1.53566	0.740228	3	0.233372	0.693616	-1.12609	1.59283	0.736527
ascorbate (Vitamin C)	MR-Egger intercept	4	-0.0166281	0.082403	-0.178135	0.144879	0.840081	3	-0.030338	0.0924964	-0.211628	0.150952	0.742918	3	-0.0321676	0.0965793	-0.221459	0.157124	0.739082
M01642	Inverse-variance weighted	4	0.0215274	0.00632761	0.00912547	0.0339292	0.000668628	3	0.0176221	0.00813955	0.00166886	0.0335753	0.030388	3	0.0174701	0.00806842	0.00165623	0.0332839	0.0303695
M01642	Weighted median	4	0.0221956	0.00749143	0.00751263	0.0368785	0.0030486	3	0.0181486	0.00941087	-0.000296405	0.0365935	0.0537969	3	0.0180527	0.00932367	-0.000221359	0.0363267	0.0528405
M01642	MR-Egger	4	-0.00920437	0.0980868	-0.201451	0.183042	0.925237	3	0.0265566	0.122735	-0.214	0.267113	0.828697	3	0.0283378	0.126843	-0.220269	0.276945	0.823217
M01642	MR-Egger intercept	4	0.00432751	0.0137834	-0.0226875	0.0313425	0.753547	3	-0.00123029	0.0168636	-0.0342823	0.0318217	0.941841	3	-0.00150943	0.0175816	-0.0359687	0.0329498	0.931583
heptanoate (7:0)	Inverse-variance weighted	4	0.0332703	0.00880849	0.016006	0.0505346	0.000158682	3	0.0347278	0.0104483	0.0142495	0.0552061	0.000888064	3	0.0344329	0.010357	0.0141336	0.0547322	0.000885423
heptanoate (7:0)	Weighted median	4	0.0327336	0.010349	0.01245	0.0530172	0.00156163	3	0.0336256	0.0124833	0.00915868	0.0580924	0.00706772	3	0.0334522	0.0123759	0.00919579	0.0577086	0.00687164
heptanoate (7:0)	MR-Egger	4	0.0111636	0.128715	-0.241114	0.263441	0.930885	3	0.0136743	0.148693	-0.277759	0.305108	0.926727	3	0.0151185	0.153946	-0.286611	0.316848	0.921769
heptanoate (7:0)	MR-Egger intercept	4	0.0031445	0.0182658	-0.0326559	0.0389449	0.863318	3	0.00291563	0.0205412	-0.0373443	0.0431756	0.887127	3	0.00269782	0.0214544	-0.039352	0.0447476	0.899932
laurate (12:0)	Inverse-variance weighted	4	-0.00469002	0.00680698	-0.0180315	0.00865142	0.490822	3	-0.0123223	0.00900563	-0.029973	0.00532842	0.171222	3	-0.0122028	0.00892694	-0.0296993	0.00529367	0.171637
laurate (12:0)	Weighted median	4	-0.00344314	0.00800203	-0.0191268	0.0122405	0.666989	3	-0.0126179	0.0102518	-0.032711	0.00747533	0.218401	3	-0.0124867	0.0101648	-0.0324094	0.00743595	0.219287
laurate (12:0)	MR-Egger	4	-0.0923182	0.108124	-0.304237	0.1196	0.393205	3	-0.0699672	0.13936	-0.343108	0.203174	0.615625	3	-0.0717066	0.143931	-0.353806	0.210392	0.618341
laurate (12:0)	MR-Egger intercept	4	0.0123012	0.0151482	-0.0173888	0.0419911	0.41676	3	0.00792044	0.0191081	-0.0295308	0.0453717	0.678503	3	0.00824654	0.0199087	-0.0307739	0.047267	0.678715
valine	Inverse-variance weighted	4	-0.00803091	0.00458948	-0.0170261	0.000964297	0.0801436	3	-0.00181385	0.00620423	-0.0139739	0.0103462	0.770014	3	-0.00179822	0.00615002	-0.013852	0.0102556	0.769987
valine	Weighted median	4	-0.00993126	0.00543341	-0.0205805	0.000718037	0.0675778	3	-0.0017207	0.00691314	-0.0152702	0.0118288	0.803436	3	-0.00170188	0.00685278	-0.0151331	0.0117293	0.803865
valine	MR-Egger	4	0.0346835	0.0743723	-0.111083	0.180451	0.640965	3	0.00237886	0.0982071	-0.190104	0.194861	0.980675	3	0.00257344	0.101376	-0.196121	0.201267	0.979748
valine	MR-Egger intercept	4	-0.00598267	0.0103969	-0.0263602	0.0143948	0.565001	3	-0.000575065	0.013443	-0.0269229	0.0257728	0.965879	3	-0.000604802	0.0139992	-0.0280427	0.0268331	0.96554
urea	Inverse-variance weighted	4	0.0359391	0.00880849	0.0186748	0.0532034	4.50261e-05	3	0.0387601	0.0104483	0.0182818	0.0592384	0.000207498	3	0.0384218	0.010357	0.0181225	0.0587211	0.000207462
urea	Weighted median	4	0.0329943	0.0105073	0.0124004	0.0535881	0.00168871	3	0.0348107	0.0126741	0.00996992	0.0596514	0.00602162	3	0.0343847	0.0125703	0.00974734	0.059022	0.00623064
urea	MR-Egger	4	0.0180833	0.128715	-0.234194	0.270361	0.888273	3	0.00161426	0.148693	-0.289819	0.293047	0.991338	3	9.16849e-05	0.153946	-0.301637	0.301821	0.999525
urea	MR-Egger intercept	4	0.00253985	0.0182658	-0.0332605	0.0383402	0.889411	3	0.00514422	0.0205412	-0.0351157	0.0454042	0.802251	3	0.00535392	0.0214544	-0.0366959	0.0474037	0.802936
cortisol	Inverse-variance weighted	4	-0.0157715	0.0117271	-0.0387562	0.00721311	0.178663	3	-0.0143998	0.0139732	-0.0417868	0.0129872	0.302761	3	-0.0142679	0.0138468	-0.0414072	0.0128714	0.302817
cortisol	Weighted median	4	-0.0158894	0.0133798	-0.0421134	0.0103345	0.235003	3	-0.0155205	0.0163342	-0.0475348	0.0164939	0.342019	3	-0.0153095	0.0162095	-0.0470796	0.0164605	0.344926
cortisol	MR-Egger	4	-0.0389109	0.177826	-0.387444	0.309623	0.826795	3	-0.0378304	0.205967	-0.441518	0.365857	0.854271	3	-0.0399155	0.213356	-0.458085	0.378254	0.851594
cortisol	MR-Egger intercept	4	0.00327626	0.0251233	-0.0459645	0.0525171	0.896244	3	0.00321978	0.0282383	-0.0521264	0.0585659	0.909221	3	0.00355591	0.0295184	-0.054299	0.0614108	0.904115
cortisone	Inverse-variance weighted	4	-0.00974356	0.00801639	-0.0254554	0.00596828	0.224193	3	-0.008492	0.00947715	-0.0270669	0.0100829	0.370226	3	-0.00840538	0.00939432	-0.0268179	0.0100071	0.370931
cortisone	Weighted median	4	-0.00977873	0.00913545	-0.0276839	0.00812642	0.284432	3	-0.0100846	0.0109531	-0.0315523	0.0113831	0.357204	3	-0.00998793	0.0108719	-0.0312964	0.0113206	0.358256
cortisone	MR-Egger	4	-0.0178966	0.118219	-0.249602	0.213809	0.879672	3	-0.0543607	0.136309	-0.321522	0.2128	0.690037	3	-0.0555723	0.141072	-0.332069	0.220924	0.693634
cortisone	MR-Egger intercept	4	0.00115891	0.0167655	-0.0317009	0.0340187	0.94489	3	0.00634499	0.0188099	-0.0305218	0.0432118	0.735875	3	0.00658078	0.0196388	-0.0319106	0.0450722	0.737557
proline	Inverse-variance weighted	4	0.0066699	0.00836892	-0.00973289	0.0230727	0.42546	3	0.0062427	0.00989534	-0.0131518	0.0256372	0.528123	3	0.00619185	0.00980886	-0.0130332	0.0254169	0.527877
proline	Weighted median	4	0.00718392	0.00952116	-0.0114772	0.025845	0.450536	3	0.00593524	0.011302	-0.0162162	0.0280867	0.599478	3	0.00586972	0.0112148	-0.0161109	0.0278503	0.600703
proline	MR-Egger	4	-0.0145042	0.123368	-0.256301	0.227293	0.906409	3	-0.023216	0.142258	-0.302036	0.255604	0.870364	3	-0.0245377	0.147231	-0.313105	0.264029	0.867636
proline	MR-Egger intercept	4	0.00300988	0.0174962	-0.0312821	0.0373018	0.863414	3	0.0040752	0.0196317	-0.0344022	0.0425526	0.835555	3	0.00428763	0.0204971	-0.035886	0.0444613	0.834306
citrulline	Inverse-variance weighted	4	-0.0137282	0.00644697	-0.026364	-0.0010924	0.0332205	3	-0.0165495	0.00857428	-0.0333548	0.000255745	0.0535899	3	-0.0164199	0.00849937	-0.0330784	0.000238535	0.053372
citrulline	Weighted median	4	-0.014173	0.00743585	-0.028747	0.000400941	0.0566445	3	-0.0158598	0.00984814	-0.0351618	0.00344223	0.107303	3	-0.0157562	0.00976317	-0.0348916	0.00337927	0.106562
citrulline	MR-Egger	4	0.0223389	0.102895	-0.179332	0.22401	0.828128	3	0.0554618	0.133388	-0.205974	0.316897	0.677561	3	0.0564449	0.137745	-0.213531	0.326421	0.68197
citrulline	MR-Egger intercept	4	-0.00506023	0.0144079	-0.0332991	0.0231787	0.725429	3	-0.0098902	0.0182819	-0.0457221	0.0259417	0.588519	3	-0.010094	0.0190456	-0.0474226	0.0272346	0.596118
biliverdin	Inverse-variance weighted	4	-0.0214159	0.0149582	-0.0507333	0.00790163	0.152225	3	-0.0208909	0.0176716	-0.0555266	0.0137449	0.237138	3	-0.0207327	0.0175183	-0.0550679	0.0136025	0.236615
biliverdin	Weighted median	4	-0.0213388	0.017172	-0.0549953	0.0123176	0.213995	3	-0.0214405	0.0201507	-0.0609352	0.0180542	0.287325	3	-0.0213323	0.0199951	-0.060522	0.0178574	0.286028
biliverdin	MR-Egger	4	0.0918914	0.218392	-0.336149	0.519932	0.673928	3	0.0819787	0.251412	-0.410779	0.574736	0.744369	3	0.0844477	0.260218	-0.42557	0.594465	0.745539
biliverdin	MR-Egger intercept	4	-0.0161313	0.0310189	-0.0769273	0.0446647	0.603031	3	-0.0142603	0.0347657	-0.0823998	0.0538792	0.681672	3	-0.0147052	0.0362984	-0.0858488	0.0564384	0.685389
serotonin (5HT)	Inverse-variance weighted	4	0.0059385	0.0133889	-0.0203033	0.0321803	0.657376	3	0.00433837	0.0158814	-0.0267886	0.0354653	0.78472	3	0.00432282	0.0157426	-0.0265321	0.0351777	0.783628
serotonin (5HT)	Weighted median	4	0.00689068	0.0155146	-0.0235174	0.0372988	0.65694	3	0.0047567	0.0185129	-0.031528	0.0410414	0.797226	3	0.00474798	0.0183776	-0.0312715	0.0407674	0.796131
serotonin (5HT)	MR-Egger	4	-0.158066	0.195647	-0.541529	0.225396	0.41914	3	-0.145063	0.226014	-0.588042	0.297915	0.52098	3	-0.152152	0.233998	-0.61078	0.306477	0.515546
serotonin (5HT)	MR-Egger intercept	4	0.0233284	0.0277641	-0.0310881	0.0777449	0.400775	3	0.0206902	0.0312226	-0.0405049	0.0818853	0.507543	3	0.0218562	0.0326106	-0.0420595	0.0857719	0.502719
gamma-glutamylglutamine	Inverse-variance weighted	4	-0.0156948	0.00755604	-0.0305043	-0.000885204	0.0377909	3	-0.0172401	0.00889216	-0.0346684	0.000188173	0.0525254	3	-0.0171031	0.00881552	-0.0343812	0.000174974	0.0523656
gamma-glutamylglutamine	Weighted median	4	-0.0148827	0.00876918	-0.03207	0.00230456	0.0896661	3	-0.0174157	0.0103429	-0.0376874	0.00285599	0.0922138	3	-0.0172287	0.0102636	-0.037345	0.00288756	0.0932254
gamma-glutamylglutamine	MR-Egger	4	0.0342866	0.110245	-0.18179	0.250363	0.755798	3	0.0614843	0.126493	-0.186437	0.309406	0.626918	3	0.0646303	0.130886	-0.191901	0.321162	0.621454
gamma-glutamylglutamine	MR-Egger intercept	4	-0.00712185	0.0156719	-0.0378382	0.0235945	0.649516	3	-0.0109236	0.0175084	-0.0452393	0.0233922	0.532689	3	-0.0114374	0.0182739	-0.0472536	0.0243788	0.531391
gamma-glutamyltyrosine	Inverse-variance weighted	4	0.0129764	0.00746339	-0.00165162	0.0276043	0.0820931	3	0.013601	0.00857428	-0.00320429	0.0304063	0.112681	3	0.0135002	0.00849937	-0.0031583	0.0301586	0.112202
gamma-glutamyltyrosine	Weighted median	4	0.0154748	0.00886823	-0.00190665	0.0328562	0.0809908	3	0.0145206	0.00996351	-0.0050075	0.0340487	0.145011	3	0.0144536	0.00987224	-0.00489562	0.0338029	0.143176
gamma-glutamyltyrosine	MR-Egger	4	-0.0529935	0.118733	-0.285706	0.179719	0.655363	3	-0.086804	0.133388	-0.348239	0.174631	0.515199	3	-0.089252	0.137745	-0.359228	0.180724	0.517018
gamma-glutamyltyrosine	MR-Egger intercept	4	0.00934766	0.0167907	-0.0235616	0.0422569	0.577722	3	0.0137898	0.0182819	-0.022042	0.0496217	0.450675	3	0.0142343	0.0190456	-0.0230943	0.0515629	0.454834
hypoxanthine	Inverse-variance weighted	4	-0.0335549	0.0103764	-0.0538923	-0.0132175	0.00122167	3	-0.035434	0.0122372	-0.0594185	-0.0114496	0.00378435	3	-0.0351235	0.0121313	-0.0589005	-0.0113465	0.00378832
hypoxanthine	Weighted median	4	-0.0345918	0.0121805	-0.0584651	-0.0107185	0.00451229	3	-0.0350114	0.0142141	-0.0628706	-0.00715217	0.0137727	3	-0.0347112	0.0141004	-0.0623474	-0.00707493	0.0138273
hypoxanthine	MR-Egger	4	-0.0256188	0.151448	-0.322452	0.271214	0.865672	3	-0.0540893	0.174084	-0.395287	0.287109	0.756022	3	-0.0559821	0.180158	-0.409085	0.297121	0.755999
hypoxanthine	MR-Egger intercept	4	-0.00113028	0.021519	-0.0433068	0.0410462	0.95811	3	0.00258721	0.0240831	-0.0446147	0.0497891	0.914449	3	0.00291741	0.0251409	-0.0463578	0.0521926	0.907619
betaine	Inverse-variance weighted	4	0.0232815	0.00845615	0.00670774	0.0398552	0.00590156	3	0.0222123	0.0100304	0.00255316	0.0418714	0.0267939	3	0.0220067	0.00994269	0.00251936	0.041494	0.0268734
betaine	Weighted median	4	0.0264677	0.00995521	0.00695588	0.0459796	0.00784471	3	0.0236048	0.0119755	0.000133198	0.0470763	0.048714	3	0.0232896	0.0118864	-7.30429e-06	0.0465865	0.0500719
betaine	MR-Egger	4	0.0924802	0.123567	-0.149706	0.334667	0.454206	3	0.111315	0.142745	-0.168461	0.391091	0.435501	3	0.116853	0.147788	-0.172807	0.406513	0.429132
betaine	MR-Egger intercept	4	-0.00984296	0.0175352	-0.0442113	0.0245254	0.574575	3	-0.0123395	0.0197195	-0.0509891	0.02631	0.531477	3	-0.0132481	0.0205962	-0.0536159	0.0271197	0.520075
xanthine	Inverse-variance weighted	4	-0.0120843	0.0104838	-0.0326322	0.00846355	0.249047	3	-0.0145615	0.0124041	-0.0388732	0.00975007	0.240424	3	-0.0144213	0.0122957	-0.0385205	0.00967782	0.240846
xanthine	Weighted median	4	-0.0108419	0.0120907	-0.0345393	0.0128555	0.369874	3	-0.0150193	0.0145149	-0.043468	0.0134294	0.300785	3	-0.0149037	0.0144059	-0.0431388	0.0133314	0.300879
xanthine	MR-Egger	4	-0.0280892	0.154261	-0.330436	0.274257	0.855513	3	-0.0331316	0.177947	-0.381901	0.315638	0.852297	3	-0.032251	0.184181	-0.393239	0.328737	0.860997
xanthine	MR-Egger intercept	4	0.00227539	0.0218803	-0.0406093	0.04516	0.917175	3	0.00256949	0.0245621	-0.0455714	0.0507103	0.916684	3	0.00248829	0.0256468	-0.0477785	0.052755	0.922709
phosphate	Inverse-variance weighted	4	0.0178769	0.00458042	0.00889943	0.0268543	9.50488e-05	3	0.0198073	0.00543311	0.00915859	0.030456	0.000266703	3	0.019653	0.00538562	0.00909732	0.0302086	0.000263109
phosphate	Weighted median	4	0.0182496	0.00561569	0.00724309	0.0292562	0.00115503	3	0.0229328	0.00687971	0.0094488	0.0364168	0.000857935	3	0.022693	0.00682501	0.00931624	0.0360698	0.000884255
phosphate	MR-Egger	4	-0.0482729	0.066932	-0.179457	0.0829115	0.470773	3	-0.0832835	0.0773204	-0.234829	0.0682618	0.281426	3	-0.0868247	0.080052	-0.243724	0.0700744	0.278098
phosphate	MR-Egger intercept	4	0.00940927	0.00949823	-0.00920691	0.0280255	0.321864	3	0.0142767	0.0106814	-0.00665845	0.0352119	0.181354	3	0.0148727	0.0111563	-0.00699318	0.0367386	0.182491
3-methoxytyrosine	Inverse-variance weighted	4	-0.00969432	0.00975173	-0.0288074	0.00941873	0.320168	3	-0.0194821	0.0116898	-0.0423937	0.00342945	0.0955955	3	-0.0193297	0.0115815	-0.0420291	0.00336961	0.095114
3-methoxytyrosine	Weighted median	4	-0.0111884	0.0112439	-0.0332261	0.0108492	0.319704	3	-0.0137686	0.014153	-0.041508	0.0139709	0.330635	3	-0.0137086	0.0140055	-0.0411588	0.0137416	0.327678
3-methoxytyrosine	MR-Egger	4	0.0134551	0.152066	-0.284589	0.3115	0.929494	3	0.0664247	0.178342	-0.283118	0.415968	0.709552	3	0.0657888	0.18483	-0.296472	0.428049	0.721884
3-methoxytyrosine	MR-Egger intercept	4	-0.00326538	0.0214058	-0.04522	0.0386892	0.878756	3	-0.0117402	0.0243201	-0.0594068	0.0359264	0.629283	3	-0.011739	0.0254406	-0.0616017	0.0381236	0.64449
pelargonate (9:0)	Inverse-variance weighted	4	0.0369616	0.00836892	0.0205589	0.0533644	1.00296e-05	3	0.0390125	0.00989534	0.019618	0.058407	8.06321e-05	3	0.0386652	0.00980886	0.0194402	0.0578902	8.08489e-05
pelargonate (9:0)	Weighted median	4	0.036534	0.0100041	0.0169263	0.0561416	0.00026031	3	0.0399638	0.0120107	0.0164233	0.0635042	0.000876728	3	0.0394453	0.0119118	0.0160987	0.062792	0.000928124
pelargonate (9:0)	MR-Egger	4	0.075133	0.123368	-0.166664	0.31693	0.542514	3	0.0909163	0.142258	-0.187903	0.369736	0.52276	3	0.0950888	0.147231	-0.193478	0.383656	0.518377
pelargonate (9:0)	MR-Egger intercept	4	-0.00542602	0.0174962	-0.039718	0.0288659	0.756466	3	-0.00718017	0.0196317	-0.0456576	0.0312973	0.714556	3	-0.00787266	0.0204971	-0.0480463	0.032301	0.700915
undecanoate (11:0)	Inverse-variance weighted	4	0.0188881	0.0057925	0.00753503	0.0302412	0.00111103	3	0.0197669	0.00680075	0.00643767	0.0330961	0.00365408	3	0.0196123	0.00674238	0.00639748	0.0328271	0.00362807
undecanoate (11:0)	Weighted median	4	0.0206027	0.00684818	0.00718055	0.0340249	0.00262541	3	0.020805	0.00807909	0.00497026	0.0366397	0.0100192	3	0.0206873	0.0080135	0.00498114	0.0363935	0.00983557
undecanoate (11:0)	MR-Egger	4	-0.0322622	0.0844863	-0.197852	0.133328	0.702563	3	-0.0522419	0.0967439	-0.241857	0.137373	0.589195	3	-0.0539649	0.100086	-0.25013	0.1422	0.589759
undecanoate (11:0)	MR-Egger intercept	4	0.00729224	0.0120164	-0.0162595	0.030844	0.543947	3	0.00999748	0.0133984	-0.0162629	0.0362579	0.455565	3	0.0103016	0.0139813	-0.0171012	0.0377043	0.461236
beta-hydroxyisovalerate	Inverse-variance weighted	4	-0.0207248	0.010026	-0.0403754	-0.00107421	0.0387241	3	-0.0217915	0.0121134	-0.0455334	0.00195038	0.072026	3	-0.0215807	0.0120014	-0.0451031	0.00194168	0.072149
beta-hydroxyisovalerate	Weighted median	4	-0.0221058	0.0119056	-0.0454403	0.0012287	0.0633453	3	-0.024791	0.0151283	-0.054442	0.00485993	0.101272	3	-0.0244036	0.0149762	-0.0537564	0.0049491	0.103207
beta-hydroxyisovalerate	MR-Egger	4	-0.137577	0.154904	-0.441184	0.166029	0.374463	3	-0.150484	0.184272	-0.51165	0.210681	0.414132	3	-0.159777	0.190968	-0.534067	0.214514	0.40278
beta-hydroxyisovalerate	MR-Egger intercept	4	0.0164622	0.0217771	-0.0262202	0.0591446	0.449686	3	0.0175947	0.0251389	-0.0316766	0.066866	0.48399	3	0.0190667	0.0262955	-0.0324716	0.070605	0.468395
taurodeoxycholate	Inverse-variance weighted	4	0.0423557	0.0382508	-0.0326144	0.117326	0.268157	3	0.048492	0.045317	-0.0403276	0.137312	0.284591	3	0.0479949	0.0449198	-0.0400463	0.136036	0.285314
taurodeoxycholate	Weighted median	4	0.0468644	0.0436674	-0.0387222	0.132451	0.283176	3	0.0592201	0.0523758	-0.0434346	0.161875	0.258191	3	0.0586683	0.0519828	-0.043216	0.160553	0.259062
taurodeoxycholate	MR-Egger	4	0.285909	0.563399	-0.818333	1.39015	0.611824	3	0.30713	0.650733	-0.968284	1.58254	0.636945	3	0.313652	0.673591	-1.00656	1.63387	0.641472
taurodeoxycholate	MR-Egger intercept	4	-0.0346123	0.079882	-0.191178	0.121954	0.664802	3	-0.0357706	0.0897804	-0.211737	0.140196	0.690318	3	-0.0370587	0.0937557	-0.220816	0.146699	0.692644
X-02973	Inverse-variance weighted	4	0.00651634	0.00563743	-0.00453283	0.0175655	0.24772	3	0.00580015	0.0066869	-0.00730594	0.0189062	0.385729	3	0.00576224	0.00662846	-0.0072293	0.0187538	0.384673
X-02973	Weighted median	4	0.00661084	0.00648919	-0.00610774	0.0193294	0.308323	3	0.00475577	0.00781258	-0.0105566	0.0200682	0.542702	3	0.004738	0.00775267	-0.010457	0.019933	0.541104
X-02973	MR-Egger	4	-0.034682	0.0823779	-0.19614	0.126776	0.673747	3	-0.0440026	0.0951636	-0.23052	0.142515	0.643802	3	-0.0450301	0.0985256	-0.238137	0.148077	0.647643
X-02973	MR-Egger intercept	4	0.00586013	0.0116901	-0.0170521	0.0287724	0.616168	3	0.00689704	0.0131464	-0.0188693	0.0326634	0.599837	3	0.00709463	0.0137308	-0.0198172	0.0340065	0.605369
X-03003	Inverse-variance weighted	4	-0.0109566	0.00896635	-0.0285303	0.00661716	0.221721	3	-0.0145966	0.0105648	-0.0353032	0.00611006	0.167088	3	-0.0144617	0.0104735	-0.0349895	0.00606607	0.167345
X-03003	Weighted median	4	-0.0076811	0.0104382	-0.0281396	0.0127774	0.461814	3	-0.0155976	0.0121917	-0.039493	0.00829771	0.200769	3	-0.0153873	0.012101	-0.0391047	0.00833013	0.203523
X-03003	MR-Egger	4	-0.0974658	0.130848	-0.353923	0.158991	0.456345	3	-0.082251	0.150289	-0.376812	0.21231	0.584183	3	-0.0862764	0.155523	-0.391095	0.218543	0.579065
X-03003	MR-Egger intercept	4	0.0123233	0.0185956	-0.0241234	0.0487701	0.507522	3	0.0093847	0.0207958	-0.0313744	0.0501438	0.651789	3	0.0100465	0.0217075	-0.0324994	0.0525925	0.643498
X-03088	Inverse-variance weighted	4	0.000722031	0.0108704	-0.0205835	0.0220276	0.947042	3	0.000956226	0.0126485	-0.0238345	0.0257469	0.939738	3	0.000936762	0.012538	-0.0236373	0.0255108	0.940443
X-03088	Weighted median	4	0.000188544	0.0124376	-0.0241887	0.0245658	0.987905	3	0.00130319	0.0142798	-0.0266847	0.0292911	0.927285	3	0.00126857	0.0141535	-0.0264718	0.0290089	0.928582
X-03088	MR-Egger	4	0.0405513	0.168258	-0.289228	0.370331	0.80955	3	0.0531062	0.192426	-0.324041	0.430253	0.782561	3	0.0543691	0.19882	-0.33531	0.444048	0.7845
X-03088	MR-Egger intercept	4	-0.00564267	0.0237876	-0.0522655	0.0409801	0.812493	3	-0.00717558	0.0264196	-0.058957	0.0446058	0.785929	3	-0.00741555	0.0275381	-0.0613892	0.0465581	0.787711
X-03094	Inverse-variance weighted	4	0.0113766	0.00845615	-0.00519716	0.0279503	0.178508	3	0.0103868	0.0100304	-0.00927235	0.0300459	0.300419	3	0.0103252	0.00994269	-0.00916213	0.0298125	0.299051
X-03094	Weighted median	4	0.014646	0.00997895	-0.0049124	0.0342044	0.142189	3	0.0154871	0.0119219	-0.00787936	0.0388535	0.193928	3	0.0154994	0.011834	-0.00769473	0.0386936	0.190284
X-03094	MR-Egger	4	-0.122751	0.123567	-0.364938	0.119435	0.320515	3	-0.138784	0.142745	-0.41856	0.140991	0.330925	3	-0.14413	0.147788	-0.43379	0.14553	0.32944
X-03094	MR-Egger intercept	4	0.0190786	0.0175352	-0.0152897	0.053447	0.276587	3	0.0206583	0.0197195	-0.0179913	0.0593078	0.29482	3	0.0215741	0.0205962	-0.0187937	0.0619419	0.294878
glycerol	Inverse-variance weighted	4	0.0168659	0.00887805	-0.000534727	0.0342666	0.0574681	3	0.0144282	0.0104483	-0.00605007	0.0349065	0.167305	3	0.0143257	0.010357	-0.00597357	0.034625	0.166605
glycerol	Weighted median	4	0.0202916	0.0104562	-0.000202123	0.0407853	0.0523027	3	0.0172426	0.0122695	-0.0068053	0.0412904	0.159928	3	0.0171979	0.0121756	-0.00666575	0.0410616	0.157804
glycerol	MR-Egger	4	-0.0885865	0.130808	-0.344965	0.167792	0.498262	3	-0.10025	0.148693	-0.391683	0.191183	0.500179	3	-0.103861	0.153946	-0.40559	0.197868	0.499893
glycerol	MR-Egger intercept	4	0.015024	0.0185935	-0.0214185	0.0514666	0.419075	3	0.0158815	0.0205412	-0.0243785	0.0561414	0.439432	3	0.0165082	0.0214544	-0.0255416	0.058558	0.441622
kynurenine	Inverse-variance weighted	4	-0.0295139	0.00741052	-0.0440382	-0.0149895	6.81366e-05	3	-0.0309171	0.00857428	-0.0477224	-0.0141118	0.0003112	3	-0.0306694	0.00849937	-0.0473278	-0.0140109	0.000308056
kynurenine	Weighted median	4	-0.0337149	0.00926112	-0.0518663	-0.0155634	0.000272135	3	-0.0374218	0.0105632	-0.0581253	-0.0167184	0.0003961	3	-0.0369617	0.0104589	-0.0574607	-0.0164627	0.000409321
kynurenine	MR-Egger	4	0.0955078	0.116936	-0.133682	0.324698	0.414069	3	0.124366	0.133388	-0.137069	0.385801	0.351149	3	0.129243	0.137745	-0.140733	0.399219	0.348104
kynurenine	MR-Egger intercept	4	-0.0176907	0.0165133	-0.0500561	0.0146747	0.284034	3	-0.0213269	0.0182819	-0.0571588	0.0145049	0.243388	3	-0.0221527	0.0190456	-0.0594813	0.0151759	0.244772
mannitol	Inverse-variance weighted	4	0.134328	0.0352249	0.065288	0.203367	0.000137054	3	0.133453	0.0421117	0.0509157	0.21599	0.0015295	3	0.132368	0.0417406	0.0505584	0.214178	0.00151802
mannitol	Weighted median	4	0.133258	0.0417786	0.0513732	0.215142	0.00142461	3	0.123833	0.0514902	0.0229144	0.224752	0.016173	3	0.122928	0.0510536	0.0228652	0.222992	0.0160476
mannitol	MR-Egger	4	-0.166668	0.521442	-1.18868	0.85534	0.74925	3	-0.225596	0.614973	-1.43092	0.979729	0.713739	3	-0.228526	0.636401	-1.47585	1.0188	0.719527
mannitol	MR-Egger intercept	4	0.0426151	0.0736575	-0.101751	0.186981	0.562887	3	0.0495381	0.0846487	-0.11637	0.215447	0.5584	3	0.0502255	0.0883769	-0.12299	0.223441	0.569824
glycerol 3-phosphate (G3P)	Inverse-variance weighted	4	0.0239918	0.00916083	0.0060369	0.0419467	0.00881998	3	0.0271519	0.0108662	0.00585455	0.0484493	0.0124633	3	0.0269171	0.0107712	0.00580582	0.0480283	0.0124553
glycerol 3-phosphate (G3P)	Weighted median	4	0.0231376	0.0105702	0.00242036	0.0438548	0.0286009	3	0.0288658	0.0127655	0.00384584	0.0538857	0.0237449	3	0.0287379	0.0126617	0.00392131	0.0535544	0.0232282
glycerol 3-phosphate (G3P)	MR-Egger	4	0.0565057	0.133864	-0.205863	0.318874	0.672943	3	0.0392809	0.154641	-0.26381	0.342371	0.799485	3	0.0417946	0.160104	-0.272004	0.355593	0.794057
glycerol 3-phosphate (G3P)	MR-Egger intercept	4	-0.00462484	0.0189965	-0.0418572	0.0326075	0.80765	3	-0.0016797	0.0213628	-0.0435501	0.0401907	0.937329	3	-0.00207808	0.0223125	-0.0458099	0.0416537	0.925796
acetylphosphate	Inverse-variance weighted	4	-0.00247337	0.00563743	-0.0135225	0.00857579	0.660849	3	-0.00139763	0.0066869	-0.0145037	0.0117085	0.834441	3	-0.00137004	0.00662846	-0.0143616	0.0116215	0.836251
acetylphosphate	Weighted median	4	-0.00341083	0.00657275	-0.0162932	0.00947153	0.603806	3	0.000804111	0.00785708	-0.0145955	0.0162037	0.918485	3	0.00082831	0.00780119	-0.0144617	0.0161184	0.915442
acetylphosphate	MR-Egger	4	-0.077787	0.0823779	-0.239245	0.0836707	0.345031	3	-0.0880691	0.0951636	-0.274586	0.0984481	0.354732	3	-0.0917947	0.0985256	-0.284901	0.101312	0.3515
acetylphosphate	MR-Egger intercept	4	0.0107128	0.0116901	-0.0121995	0.033625	0.35946	3	0.0120029	0.0131464	-0.0137635	0.0377693	0.361232	3	0.0126304	0.0137308	-0.0142814	0.0395423	0.357645
carnitine	Inverse-variance weighted	4	-0.00753588	0.00528509	-0.0178945	0.00282272	0.153905	3	-0.00790738	0.00626897	-0.0201943	0.00437958	0.207182	3	-0.00783752	0.00621418	-0.0200171	0.00434205	0.207226
carnitine	Weighted median	4	-0.00622726	0.00604727	-0.0180797	0.00562517	0.303121	3	-0.00612529	0.00728489	-0.0204034	0.00815283	0.400448	3	-0.00606602	0.00723029	-0.0202371	0.00810508	0.401484
carnitine	MR-Egger	4	0.00462629	0.0772293	-0.14674	0.155993	0.952233	3	0.00721047	0.0892159	-0.167649	0.18207	0.935585	3	0.00832225	0.0923677	-0.172715	0.18936	0.928208
carnitine	MR-Egger intercept	4	-0.00172997	0.0109595	-0.0232102	0.0197502	0.874574	3	-0.00209363	0.0123247	-0.0262496	0.0220623	0.865111	3	-0.00225718	0.0128726	-0.0274871	0.0229727	0.860806
choline	Inverse-variance weighted	4	0.00694438	0.00508673	-0.00302544	0.0169142	0.172192	3	0.00850268	0.00596385	-0.00318626	0.0201916	0.153954	3	0.00842884	0.00591279	-0.00316002	0.0200177	0.154005
choline	Weighted median	4	0.0071915	0.00583323	-0.00424143	0.0186244	0.217632	3	0.00862665	0.00676675	-0.00463594	0.0218892	0.202359	3	0.008519	0.00671217	-0.00463661	0.0216746	0.204374
choline	MR-Egger	4	0.0344647	0.0741797	-0.110925	0.179854	0.64221	3	0.0163575	0.0848423	-0.14993	0.182645	0.847116	3	0.0170525	0.087764	-0.154962	0.189067	0.845941
choline	MR-Egger intercept	4	-0.00392465	0.0105538	-0.0246097	0.0167604	0.709989	3	-0.00109091	0.0117541	-0.0241285	0.0219466	0.926053	3	-0.00120779	0.0122638	-0.0252445	0.0228289	0.921548
N-acetylornithine	Inverse-variance weighted	4	-0.00199852	0.0155294	-0.0324355	0.0284385	0.897601	3	-0.00375603	0.0185762	-0.0401647	0.0326527	0.839764	3	-0.00368223	0.0184087	-0.0397625	0.0323981	0.84146
N-acetylornithine	Weighted median	4	0.00432854	0.0179387	-0.0308306	0.0394877	0.809326	3	0.00621882	0.0225305	-0.0379402	0.0503779	0.782535	3	0.00614871	0.0223397	-0.0376363	0.0499337	0.783134
N-acetylornithine	MR-Egger	4	-0.185103	0.234816	-0.645334	0.275127	0.430526	3	-0.236984	0.2749	-0.775778	0.30181	0.388646	3	-0.246822	0.284699	-0.804821	0.311178	0.385965
N-acetylornithine	MR-Egger intercept	4	0.0258939	0.0331339	-0.0390473	0.0908351	0.434513	3	0.0320487	0.0376886	-0.0418196	0.105917	0.395128	3	0.0337082	0.0393873	-0.0434894	0.110906	0.3921
N1-methyladenosine	Inverse-variance weighted	4	-0.00770477	0.00458948	-0.0167	0.00129043	0.0931927	3	-0.00882752	0.00560958	-0.0198221	0.00216705	0.115568	3	-0.00875755	0.00555588	-0.0196469	0.00213179	0.114965
N1-methyladenosine	Weighted median	4	-0.006279	0.00536101	-0.0167864	0.00422839	0.241505	3	-0.00682146	0.00668223	-0.0199184	0.00627546	0.307332	3	-0.00681158	0.00661396	-0.0197747	0.00615154	0.303067
N1-methyladenosine	MR-Egger	4	0.0394715	0.0743723	-0.106296	0.185238	0.595607	3	0.0457473	0.0913882	-0.13337	0.224865	0.616665	3	0.0459125	0.0948038	-0.1399	0.231725	0.628181
N1-methyladenosine	MR-Egger intercept	4	-0.00660759	0.0103969	-0.0269851	0.0137699	0.525078	3	-0.0074002	0.0123686	-0.0316423	0.0168419	0.549637	3	-0.0074835	0.0129549	-0.0328746	0.0179076	0.563495
3-methyl-2-oxovalerate	Inverse-variance weighted	4	-0.0376415	0.00801639	-0.0533534	-0.0219297	2.65864e-06	3	-0.0383666	0.00947715	-0.0569415	-0.0197918	5.15836e-05	3	-0.0380332	0.00939432	-0.0564457	-0.0196206	5.1541e-05
3-methyl-2-oxovalerate	Weighted median	4	-0.0383067	0.00969292	-0.0573045	-0.0193089	7.7491e-05	3	-0.0398453	0.0114215	-0.0622311	-0.0174595	0.000485533	3	-0.039648	0.0113223	-0.0618393	-0.0174567	0.000462184
3-methyl-2-oxovalerate	MR-Egger	4	-0.0338398	0.118219	-0.265545	0.197865	0.774689	3	-0.0512754	0.136309	-0.318437	0.215886	0.706791	3	-0.0541052	0.141072	-0.330602	0.222391	0.701328
3-methyl-2-oxovalerate	MR-Egger intercept	4	-0.000540392	0.0167655	-0.0334002	0.0323194	0.974287	3	0.00178566	0.0188099	-0.0350811	0.0386525	0.924369	3	0.00224239	0.0196388	-0.036249	0.0407338	0.909094
3-methylhistidine	Inverse-variance weighted	4	0.0329324	0.0322169	-0.0302115	0.0960763	0.306682	3	0.0342618	0.0382875	-0.0407803	0.109304	0.370864	3	0.0338823	0.0379453	-0.0404891	0.108254	0.371898
3-methylhistidine	Weighted median	4	0.0344898	0.0366215	-0.037287	0.106267	0.346299	3	0.0445041	0.045054	-0.0438001	0.132808	0.323253	3	0.0440468	0.0447254	-0.0436133	0.131707	0.324709
3-methylhistidine	MR-Egger	4	0.235274	0.479675	-0.704872	1.17542	0.62379	3	0.303439	0.556574	-0.787426	1.3943	0.585622	3	0.309979	0.576424	-0.819792	1.43975	0.590741
3-methylhistidine	MR-Egger intercept	4	-0.028682	0.0678407	-0.161647	0.104283	0.672452	3	-0.0370901	0.076509	-0.187045	0.112865	0.627832	3	-0.0383789	0.0799523	-0.195082	0.118325	0.631211
3-phenylpropionate (hydrocinnamate)	Inverse-variance weighted	4	0.00701427	0.0164919	-0.0253093	0.0393379	0.670607	3	0.00755521	0.0206864	-0.0329893	0.0480998	0.714943	3	0.00749656	0.0205056	-0.0326937	0.0476868	0.714674
3-phenylpropionate (hydrocinnamate)	Weighted median	4	0.00843529	0.018654	-0.0281259	0.0449964	0.651127	3	0.00752517	0.0237462	-0.0390165	0.0540669	0.75132	3	0.0075037	0.0235391	-0.038632	0.0536394	0.749896
3-phenylpropionate (hydrocinnamate)	MR-Egger	4	0.0175361	0.250525	-0.473483	0.508555	0.944196	3	0.00443258	0.305634	-0.594599	0.603465	0.988429	3	0.00620202	0.316044	-0.613233	0.625637	0.984343
3-phenylpropionate (hydrocinnamate)	MR-Egger intercept	4	-0.00148602	0.0353053	-0.0706831	0.067711	0.966427	3	0.000430793	0.0420681	-0.0820212	0.0828828	0.99183	3	0.000180133	0.0438844	-0.0858317	0.086192	0.996725
phenylacetate	Inverse-variance weighted	4	-0.0352144	0.014266	-0.0631753	-0.0072536	0.0135712	3	-0.0381168	0.0171428	-0.0717161	-0.00451741	0.0261835	3	-0.0377478	0.0169859	-0.0710396	-0.00445594	0.0262634
phenylacetate	Weighted median	4	-0.0356743	0.016588	-0.0681863	-0.00316241	0.0315071	3	-0.0397777	0.0204053	-0.0797712	0.000215922	0.0512498	3	-0.0393524	0.0202006	-0.0789448	0.000240051	0.0514053
phenylacetate	MR-Egger	4	-0.0739432	0.219398	-0.503956	0.35607	0.736097	3	-0.119857	0.259147	-0.627776	0.388063	0.64372	3	-0.123046	0.268459	-0.649216	0.403124	0.646706
phenylacetate	MR-Egger intercept	4	0.00546289	0.0308818	-0.0550643	0.0659901	0.859589	3	0.0111934	0.0354096	-0.0582082	0.080595	0.751918	3	0.0117864	0.0370208	-0.0607731	0.0843458	0.750203
glycerophosphorylcholine (GPC)	Inverse-variance weighted	4	-0.0107058	0.0116272	-0.0334947	0.0120831	0.357179	3	-0.0134101	0.0137917	-0.0404414	0.0136212	0.330886	3	-0.013273	0.0136712	-0.0400681	0.013522	0.33161
glycerophosphorylcholine (GPC)	Weighted median	4	-0.0077973	0.0135053	-0.0342672	0.0186726	0.563703	3	-0.0129921	0.0166111	-0.0455493	0.019565	0.434134	3	-0.0128579	0.0164948	-0.0451871	0.0194713	0.435679
glycerophosphorylcholine (GPC)	MR-Egger	4	-0.0342491	0.169904	-0.367256	0.298757	0.840246	3	-0.0348012	0.196275	-0.419493	0.349891	0.859266	3	-0.0326384	0.203209	-0.430921	0.365644	0.872397
glycerophosphorylcholine (GPC)	MR-Egger intercept	4	0.00334885	0.0241109	-0.0439076	0.0506053	0.889534	3	0.00296238	0.0271143	-0.0501808	0.0561055	0.913	3	0.00270493	0.0283198	-0.0528008	0.0582107	0.923907
aspartate	Inverse-variance weighted	4	-0.0669724	0.0139334	-0.0942814	-0.0396634	1.53513e-06	3	-0.0653653	0.0175926	-0.0998462	-0.0308845	0.000202799	3	-0.0647696	0.0174398	-0.0989509	-0.0305882	0.000204092
aspartate	Weighted median	4	-0.0680467	0.0170289	-0.101423	-0.0346707	6.44331e-05	3	-0.0580621	0.021428	-0.10006	-0.0160639	0.00673578	3	-0.0572847	0.021238	-0.0989104	-0.015659	0.00699096
aspartate	MR-Egger	4	-0.110637	0.211785	-0.525727	0.304453	0.60139	3	-0.236994	0.259951	-0.746488	0.272499	0.361932	3	-0.246017	0.268719	-0.772697	0.280663	0.35992
aspartate	MR-Egger intercept	4	0.00616623	0.0298431	-0.0523252	0.0646577	0.836306	3	0.0236955	0.0358071	-0.0464852	0.0938762	0.508129	3	0.0252381	0.0373393	-0.0479456	0.0984217	0.499096
X-04357	Inverse-variance weighted	4	-0.0137326	0.0177436	-0.0485094	0.0210441	0.43896	3	-0.0180346	0.0212427	-0.0596696	0.0236005	0.395895	3	-0.0178398	0.0210517	-0.0591005	0.0234208	0.396756
X-04357	Weighted median	4	-0.0153558	0.0204245	-0.0553871	0.0246756	0.452154	3	-0.0207828	0.0250984	-0.0699748	0.0284092	0.40764	3	-0.0205463	0.0249171	-0.0693828	0.0282903	0.409607
X-04357	MR-Egger	4	-0.0794122	0.2659	-0.600567	0.441743	0.765204	3	-0.146579	0.310939	-0.756007	0.46285	0.63735	3	-0.150263	0.322061	-0.781491	0.480964	0.640809
X-04357	MR-Egger intercept	4	0.00929673	0.0375534	-0.0643066	0.0829001	0.804475	3	0.0176876	0.042685	-0.0659734	0.101349	0.6786	3	0.018383	0.044613	-0.0690567	0.105823	0.680298
X-04494	Inverse-variance weighted	4	-0.0121821	0.0116272	-0.034971	0.0106068	0.294766	3	-0.0153215	0.0137917	-0.0423528	0.0117098	0.266603	3	-0.0151792	0.0136712	-0.0419742	0.0116159	0.266869
X-04494	Weighted median	4	-0.00937802	0.0133674	-0.0355776	0.0168216	0.482953	3	-0.01633	0.0158785	-0.0474514	0.0147913	0.303744	3	-0.0161109	0.0157582	-0.0469965	0.0147746	0.3066
X-04494	MR-Egger	4	-0.0867778	0.169904	-0.419784	0.246229	0.60953	3	-0.0806737	0.196275	-0.465366	0.304018	0.681055	3	-0.0846983	0.203209	-0.482981	0.313584	0.676822
X-04494	MR-Egger intercept	4	0.0106106	0.0241109	-0.0366458	0.0578671	0.659881	3	0.00905044	0.0271143	-0.0440927	0.0621936	0.73854	3	0.00971037	0.0283198	-0.0457954	0.0652161	0.731686
X-04495	Inverse-variance weighted	4	-0.016732	0.0128695	-0.0419557	0.00849164	0.193555	3	-0.0212628	0.0154923	-0.0516271	0.00910147	0.169914	3	-0.0210268	0.0153506	-0.0511135	0.00905978	0.170758
X-04495	Weighted median	4	-0.00939158	0.015222	-0.0392262	0.020443	0.537252	3	-0.0114824	0.0194772	-0.049657	0.0266922	0.555505	3	-0.011316	0.0192776	-0.0490994	0.0264674	0.557202
X-04495	MR-Egger	4	-0.178906	0.196288	-0.563623	0.205811	0.36206	3	-0.27028	0.231742	-0.724486	0.183925	0.243493	3	-0.281725	0.240106	-0.752324	0.188874	0.24066
X-04495	MR-Egger intercept	4	0.0228899	0.0276453	-0.0312938	0.0770736	0.407679	3	0.0341331	0.031694	-0.027986	0.0962522	0.2815	3	0.0360571	0.033141	-0.028898	0.101012	0.276599
X-04498	Inverse-variance weighted	4	0.0150405	0.010026	-0.00461006	0.0346911	0.133575	3	0.00974403	0.0121134	-0.0139979	0.0334859	0.421167	3	0.009664	0.0120014	-0.0138584	0.0331864	0.420683
X-04498	Weighted median	4	0.0178441	0.0117321	-0.00515052	0.0408387	0.128271	3	0.00939104	0.0144536	-0.0189376	0.0377197	0.515863	3	0.00930595	0.0143058	-0.0187329	0.0373448	0.515368
X-04498	MR-Egger	4	-0.0572629	0.154904	-0.360869	0.246344	0.711631	3	-0.0906669	0.184272	-0.451832	0.270499	0.622699	3	-0.0962136	0.190968	-0.470504	0.278077	0.614388
X-04498	MR-Egger intercept	4	0.0101861	0.0217771	-0.0324963	0.0528685	0.639968	3	0.0137281	0.0251389	-0.0355433	0.0629994	0.585005	3	0.0146078	0.0262955	-0.0369305	0.0661461	0.578536
X-04499	Inverse-variance weighted	4	-0.0121141	0.00924466	-0.0302333	0.00600513	0.190065	3	-0.0115041	0.011152	-0.0333616	0.0103535	0.302274	3	-0.0113903	0.0110494	-0.0330467	0.0102661	0.302609
X-04499	Weighted median	4	-0.0124944	0.0106388	-0.033346	0.00835726	0.240228	3	-0.011253	0.0131781	-0.0370815	0.0145755	0.393149	3	-0.0110847	0.0130438	-0.03665	0.0144807	0.395433
X-04499	MR-Egger	4	-0.088908	0.14203	-0.367282	0.189465	0.531327	3	-0.0795426	0.168389	-0.40958	0.250494	0.63666	3	-0.0837146	0.17449	-0.425709	0.25828	0.631393
X-04499	MR-Egger intercept	4	0.0108274	0.0199827	-0.028338	0.0499927	0.58793	3	0.0093124	0.0229968	-0.0357604	0.0543852	0.685519	3	0.00998903	0.0240513	-0.0371506	0.0571286	0.677906
X-04500	Inverse-variance weighted	4	-0.0440558	0.0404288	-0.123295	0.0351832	0.27584	3	-0.0450356	0.0491107	-0.141291	0.0512196	0.359131	3	-0.044664	0.0486764	-0.140068	0.0507399	0.358843
X-04500	Weighted median	4	-0.0418713	0.0461715	-0.132366	0.0486233	0.364479	3	-0.0466196	0.0567851	-0.157916	0.0646772	0.411656	3	-0.0464587	0.0563362	-0.156876	0.0639582	0.40956
X-04500	MR-Egger	4	-0.167768	0.606475	-1.35644	1.0209	0.782066	3	-0.0349139	0.718003	-1.44217	1.37235	0.961217	3	-0.0419407	0.743125	-1.49844	1.41456	0.954993
X-04500	MR-Egger intercept	4	0.0175118	0.0856576	-0.150374	0.185398	0.83801	3	-0.00139572	0.0987756	-0.194992	0.192201	0.988726	3	-0.000378809	0.103144	-0.202537	0.201779	0.99707
dihomo-linoleate (20:2n6)	Inverse-variance weighted	4	0.0321565	0.0133997	0.00589352	0.0584194	0.0164045	3	0.0337398	0.0156602	0.00304628	0.0644332	0.031202	3	0.0334698	0.0155243	0.00304266	0.0638969	0.031087
dihomo-linoleate (20:2n6)	Weighted median	4	0.0341047	0.0156317	0.00346711	0.0647423	0.029127	3	0.0395624	0.0185725	0.00316087	0.0759639	0.0331589	3	0.039052	0.0183982	0.00299222	0.0751118	0.0337873
dihomo-linoleate (20:2n6)	MR-Egger	4	-0.0676098	0.20175	-0.463032	0.327813	0.737537	3	-0.109217	0.230761	-0.5615	0.343065	0.636004	3	-0.113845	0.238555	-0.581405	0.353714	0.633199
dihomo-linoleate (20:2n6)	MR-Egger intercept	4	0.0141714	0.0285944	-0.0418727	0.0702154	0.620177	3	0.0197443	0.0317977	-0.042578	0.0820667	0.534642	3	0.0205205	0.0331595	-0.0444709	0.0855119	0.53602
X-18601	Inverse-variance weighted	4	0.00468876	0.0198917	-0.0342982	0.0436758	0.813654	3	0.00285788	0.0235234	-0.0432471	0.0489629	0.903302	3	0.00291027	0.0233189	-0.0427939	0.0486145	0.90068
X-18601	Weighted median	4	0.0106065	0.0232776	-0.0350168	0.0562297	0.648641	3	0.00287177	0.0279485	-0.0519063	0.0576498	0.91816	3	0.00305065	0.0277502	-0.0513388	0.0574401	0.912463
X-18601	MR-Egger	4	-0.25471	0.290479	-0.824038	0.314619	0.380563	3	-0.329555	0.334684	-0.985523	0.326413	0.324783	3	-0.339349	0.346432	-1.01834	0.339645	0.327306
X-18601	MR-Egger intercept	4	0.0369219	0.0412487	-0.0439242	0.117768	0.370732	3	0.0460694	0.0462694	-0.044617	0.136756	0.319407	3	0.0478402	0.0483136	-0.0468527	0.142533	0.322076
2-hydroxystearate	Inverse-variance weighted	4	-0.000440546	0.00896635	-0.0180143	0.0171332	0.960813	3	-0.0025655	0.0105648	-0.0232721	0.0181411	0.808134	3	-0.00256155	0.0104735	-0.0230893	0.0179662	0.806787
2-hydroxystearate	Weighted median	4	0.000837474	0.0103604	-0.0194685	0.0211434	0.935574	3	-0.00404458	0.0120424	-0.0276472	0.0195581	0.736975	3	-0.00407616	0.0119518	-0.0275012	0.0193489	0.733066
2-hydroxystearate	MR-Egger	4	0.0886577	0.130848	-0.167799	0.345115	0.498048	3	0.084149	0.150289	-0.210412	0.37871	0.575538	3	0.0870148	0.155523	-0.217804	0.391834	0.575821
2-hydroxystearate	MR-Egger intercept	4	-0.0126922	0.0185956	-0.0491389	0.0237546	0.494901	3	-0.0120286	0.0207958	-0.0527877	0.0287304	0.562984	3	-0.0125313	0.0217075	-0.0550773	0.0300146	0.563751
X-05426	Inverse-variance weighted	4	0.0386555	0.0214284	-0.00334333	0.0806544	0.0712406	3	0.0331745	0.0254164	-0.0166407	0.0829898	0.191811	3	0.0328729	0.0251911	-0.0165006	0.0822465	0.191912
X-05426	Weighted median	4	0.0387571	0.0246352	-0.00952705	0.0870411	0.115663	3	0.025176	0.0299413	-0.0335079	0.0838599	0.400435	3	0.0249093	0.0297131	-0.0333272	0.0831458	0.401846
X-05426	MR-Egger	4	-0.111705	0.319153	-0.737234	0.513824	0.726335	3	-0.03031	0.368056	-0.751686	0.691066	0.934367	3	-0.0360063	0.381085	-0.782918	0.710906	0.924725
X-05426	MR-Egger intercept	4	0.0213433	0.0452007	-0.0672485	0.109935	0.636792	3	0.0087595	0.0506626	-0.0905373	0.108056	0.862731	3	0.00958696	0.0529252	-0.0941446	0.113318	0.856256
indolelactate	Inverse-variance weighted	4	-0.00613065	0.00992459	-0.0255825	0.0133212	0.536758	3	-0.00363247	0.0126485	-0.0284232	0.0211582	0.773971	3	-0.0036063	0.012538	-0.0281804	0.0209678	0.773631
indolelactate	Weighted median	4	-0.00498052	0.0112675	-0.0270644	0.0171033	0.65847	3	-0.00288164	0.0142421	-0.0307957	0.0250324	0.839657	3	-0.00286296	0.0141144	-0.0305267	0.0248008	0.839261
indolelactate	MR-Egger	4	0.0445608	0.154786	-0.258815	0.347936	0.773434	3	0.0184421	0.192426	-0.358705	0.395589	0.923647	3	0.0186216	0.19882	-0.371058	0.408301	0.925379
indolelactate	MR-Egger intercept	4	-0.00713824	0.0217517	-0.0497709	0.0354944	0.742784	3	-0.00303736	0.0264196	-0.0548187	0.048744	0.908472	3	-0.00308487	0.0275381	-0.0570585	0.0508887	0.910806
glycylvaline	Inverse-variance weighted	4	-9.95886e-06	0.0288045	-0.0564657	0.0564458	0.999724	3	0.0136564	0.0341445	-0.0532656	0.0805783	0.689187	3	0.0135249	0.0338461	-0.0528122	0.079862	0.68945
glycylvaline	Weighted median	4	-0.0043406	0.0334366	-0.069875	0.0611938	0.896712	3	0.00702873	0.0394031	-0.0701999	0.0842573	0.858424	3	0.00686314	0.0390937	-0.0697591	0.0834853	0.860643
glycylvaline	MR-Egger	4	0.0184459	0.426478	-0.817436	0.854328	0.965501	3	-0.0423551	0.491701	-1.00607	0.921361	0.931355	3	-0.0491183	0.508861	-1.04647	0.94823	0.923103
glycylvaline	MR-Egger intercept	4	-0.00262334	0.0604819	-0.121166	0.115919	0.965403	3	0.00774704	0.0678437	-0.125224	0.140718	0.909088	3	0.00873892	0.0708304	-0.130086	0.147564	0.901808
gamma-glutamylleucine	Inverse-variance weighted	4	-0.0237562	0.00775147	-0.0389488	-0.0085636	0.00217863	3	-0.0241786	0.00919449	-0.0421995	-0.00615771	0.00854648	3	-0.023974	0.00911413	-0.0418373	-0.00611059	0.00852804
gamma-glutamylleucine	Weighted median	4	-0.0240287	0.00910151	-0.0418673	-0.00619007	0.00828868	3	-0.0249064	0.0108406	-0.0461537	-0.00365911	0.0215902	3	-0.0247994	0.010755	-0.0458788	-0.00371995	0.0211193
gamma-glutamylleucine	MR-Egger	4	-0.00619943	0.11327	-0.228204	0.215805	0.956352	3	-0.0220652	0.13085	-0.278526	0.234396	0.866088	3	-0.0242496	0.135473	-0.289771	0.241272	0.857938
gamma-glutamylleucine	MR-Egger intercept	4	-0.00249731	0.0160739	-0.0340016	0.029007	0.876534	3	-0.000292673	0.0180762	-0.0357214	0.0351361	0.987082	3	3.84966e-05	0.0188798	-0.0369653	0.0370423	0.998373
eicosapentaenoate (EPA; 20:5n3)	Inverse-variance weighted	4	0.0429796	0.0132242	0.0170606	0.0688985	0.00115379	3	0.0525873	0.0159136	0.0213972	0.0837774	0.000951303	3	0.0521272	0.0157683	0.0212219	0.0830324	0.000946963
eicosapentaenoate (EPA; 20:5n3)	Weighted median	4	0.0429793	0.015345	0.0129036	0.0730551	0.00509665	3	0.0510764	0.0195619	0.0127357	0.089417	0.0090275	3	0.0506836	0.0193661	0.0127267	0.0886405	0.00886737
eicosapentaenoate (EPA; 20:5n3)	MR-Egger	4	0.0398796	0.201454	-0.354964	0.434723	0.843077	3	-0.0310732	0.237678	-0.496914	0.434768	0.895984	3	-0.0311841	0.246251	-0.513828	0.45146	0.899229
eicosapentaenoate (EPA; 20:5n3)	MR-Egger intercept	4	0.000437617	0.028378	-0.0551822	0.0560575	0.987696	3	0.0114703	0.0325139	-0.0522557	0.0751963	0.724252	3	0.0115255	0.0339972	-0.0551077	0.0781587	0.734599
estrone 3-sulfate	Inverse-variance weighted	4	0.0250533	0.0455763	-0.0642746	0.114381	0.582525	3	0.0318739	0.0538663	-0.0737022	0.13745	0.554037	3	0.031625	0.0533894	-0.0730163	0.136266	0.553619
estrone 3-sulfate	Weighted median	4	0.0262288	0.0517533	-0.0752058	0.127663	0.612292	3	0.0387275	0.0622062	-0.0831943	0.160649	0.533569	3	0.0383147	0.0617282	-0.0826703	0.1593	0.534797
estrone 3-sulfate	MR-Egger	4	-0.175433	0.681634	-1.51141	1.16054	0.796892	3	-0.170858	0.787349	-1.71403	1.37232	0.828206	3	-0.178387	0.814948	-1.77566	1.41888	0.826733
estrone 3-sulfate	MR-Egger intercept	4	0.0284349	0.0964596	-0.160622	0.217492	0.768158	3	0.0279518	0.108302	-0.184317	0.24022	0.796337	3	0.0292085	0.1131	-0.192463	0.25088	0.796211
glycocholate	Inverse-variance weighted	4	-0.0429121	0.0226846	-0.087373	0.00154888	0.058533	3	-0.0480046	0.0271064	-0.101132	0.00512287	0.0765653	3	-0.0475669	0.0268631	-0.100218	0.00508386	0.0766083
glycocholate	Weighted median	4	-0.042753	0.026002	-0.0937159	0.00820999	0.100131	3	-0.0474066	0.0316845	-0.109507	0.0146939	0.1346	3	-0.046765	0.0314413	-0.108389	0.0148589	0.136916
glycocholate	MR-Egger	4	-0.134864	0.340572	-0.802373	0.532645	0.692111	3	-0.0955016	0.397691	-0.874961	0.683958	0.810222	3	-0.0995382	0.411852	-0.906753	0.707677	0.809025
glycocholate	MR-Egger intercept	4	0.0130165	0.0481037	-0.081265	0.107298	0.786704	3	0.00653574	0.0545964	-0.100471	0.113543	0.904713	3	0.00721477	0.0570525	-0.104606	0.119036	0.899369
glycodeoxycholate	Inverse-variance weighted	4	0.125711	0.050444	0.0268425	0.224579	0.0126994	3	0.124191	0.0602494	0.00610418	0.242278	0.0392764	3	0.122938	0.0597207	0.00588714	0.239988	0.0395382
glycodeoxycholate	Weighted median	4	0.134575	0.0600126	0.0169522	0.252197	0.0249328	3	0.0905115	0.0733112	-0.0531759	0.234199	0.216972	3	0.0889625	0.0728205	-0.0537629	0.231688	0.221833
glycodeoxycholate	MR-Egger	4	1.04694	0.746699	-0.416562	2.51044	0.160888	3	1.02654	0.867771	-0.67426	2.72734	0.236824	3	1.06722	0.898216	-0.693251	2.82769	0.234772
glycodeoxycholate	MR-Egger intercept	4	-0.130814	0.105788	-0.338155	0.0765274	0.21625	3	-0.124738	0.119668	-0.359283	0.109808	0.297244	3	-0.131663	0.124963	-0.376586	0.11326	0.292058
taurochenodeoxycholate	Inverse-variance weighted	4	-0.0165498	0.0236528	-0.0629084	0.0298088	0.484115	3	-0.0129461	0.0293463	-0.0704638	0.0445717	0.659107	3	-0.0128343	0.0290899	-0.0698494	0.0441808	0.659072
taurochenodeoxycholate	Weighted median	4	-0.0176821	0.0272261	-0.0710443	0.03568	0.516044	3	-0.0203375	0.0339508	-0.0868799	0.0462048	0.549153	3	-0.0203284	0.0337048	-0.0863886	0.0457318	0.546422
taurochenodeoxycholate	MR-Egger	4	-0.145357	0.356348	-0.843786	0.553071	0.683341	3	-0.103375	0.430088	-0.946332	0.739583	0.810054	3	-0.111341	0.444845	-0.983222	0.76054	0.802361
taurochenodeoxycholate	MR-Egger intercept	4	0.0182159	0.0502833	-0.0803375	0.116769	0.717154	3	0.0124851	0.0592422	-0.103627	0.128598	0.833085	3	0.0137178	0.0618151	-0.107438	0.134873	0.824379
taurocholate	Inverse-variance weighted	4	0.0241095	0.0323837	-0.0393615	0.0875805	0.456577	3	0.0255116	0.0386933	-0.0503259	0.101349	0.509685	3	0.0252811	0.0383487	-0.049881	0.100443	0.50974
taurocholate	Weighted median	4	0.0255924	0.0369405	-0.0468097	0.0979945	0.488435	3	0.0241274	0.0445751	-0.0632381	0.111493	0.588318	3	0.0239657	0.0442329	-0.0627292	0.110661	0.587952
taurocholate	MR-Egger	4	-0.141788	0.484566	-1.09152	0.807944	0.769822	3	0.0167819	0.563697	-1.08804	1.12161	0.97625	3	0.0162307	0.583665	-1.12773	1.16019	0.977815
taurocholate	MR-Egger intercept	4	0.0235149	0.0685305	-0.110802	0.157832	0.731501	3	0.00120316	0.077508	-0.15071	0.153116	0.987615	3	0.00125833	0.0809748	-0.157449	0.159966	0.987602
X-05907	Inverse-variance weighted	4	0.00224363	0.00880849	-0.0150207	0.0195079	0.798946	3	-0.000602705	0.0104483	-0.021081	0.0198756	0.954	3	-0.000577543	0.010357	-0.0208768	0.0197217	0.95553
X-05907	Weighted median	4	0.00646242	0.0103217	-0.0137677	0.0266925	0.531247	3	0.00113003	0.0122465	-0.0228726	0.0251326	0.92648	3	0.00116029	0.0121579	-0.0226688	0.0249894	0.923969
X-05907	MR-Egger	4	-0.121388	0.128715	-0.373666	0.130889	0.345643	3	-0.122067	0.148693	-0.4135	0.169367	0.411686	3	-0.127602	0.153946	-0.429331	0.174127	0.407176
X-05907	MR-Egger intercept	4	0.0175856	0.0182658	-0.0182147	0.053386	0.335667	3	0.0168212	0.0205412	-0.0234388	0.0570811	0.412843	3	0.0177427	0.0214544	-0.0243071	0.0597925	0.40824
docosahexaenoate (DHA; 22:6n3)	Inverse-variance weighted	4	0.035339	0.012438	0.0109609	0.059717	0.00449428	3	0.0428966	0.0149451	0.0136049	0.0721884	0.00410097	3	0.0425197	0.0148092	0.0134943	0.0715452	0.0040895
docosahexaenoate (DHA; 22:6n3)	Weighted median	4	0.0331459	0.0143885	0.00494486	0.0613469	0.0212434	3	0.0465056	0.0180889	0.011052	0.0819592	0.0101421	3	0.0458905	0.0179237	0.0107608	0.0810203	0.0104573
docosahexaenoate (DHA; 22:6n3)	MR-Egger	4	0.0296163	0.188534	-0.339904	0.399137	0.875176	3	-0.0315776	0.221817	-0.466332	0.403177	0.886797	3	-0.0330359	0.229798	-0.483431	0.41736	0.88569
docosahexaenoate (DHA; 22:6n3)	MR-Egger intercept	4	0.000808504	0.026578	-0.0512835	0.0529005	0.975732	3	0.0102216	0.0303753	-0.0493129	0.069756	0.736486	3	0.0104631	0.0317568	-0.0517791	0.0727054	0.741796
1-stearoylglycerophosphoinositol	Inverse-variance weighted	4	0.0125109	0.0130508	-0.0130683	0.03809	0.337746	3	0.0165494	0.0156325	-0.0140898	0.0471886	0.289758	3	0.0163964	0.0154908	-0.0139649	0.0467578	0.289844
1-stearoylglycerophosphoinositol	Weighted median	4	0.0103118	0.014774	-0.0186446	0.0392683	0.485194	3	0.0183336	0.0183293	-0.0175912	0.0542584	0.317198	3	0.0180638	0.0181735	-0.0175557	0.0536832	0.320242
1-stearoylglycerophosphoinositol	MR-Egger	4	0.063423	0.198714	-0.326049	0.452895	0.749599	3	0.0602706	0.23333	-0.397047	0.517588	0.79617	3	0.0637827	0.241663	-0.409869	0.537434	0.791832
1-stearoylglycerophosphoinositol	MR-Egger intercept	4	-0.0071926	0.0280126	-0.0620963	0.0477111	0.797362	3	-0.00599972	0.0319471	-0.068615	0.0566155	0.851032	3	-0.00656092	0.0333909	-0.072006	0.0588841	0.844228
X-06226	Inverse-variance weighted	4	0.0112872	0.00810381	-0.00459602	0.0271703	0.163674	3	0.010399	0.00961242	-0.00844105	0.029239	0.279331	3	0.010328	0.00952841	-0.00834732	0.0290034	0.278401
X-06226	Weighted median	4	0.0106243	0.00943814	-0.00787415	0.0291227	0.260303	3	0.0130208	0.0112266	-0.00898297	0.0350245	0.246125	3	0.0129987	0.011142	-0.00883927	0.0348367	0.243357
X-06226	MR-Egger	4	-0.10432	0.118418	-0.336415	0.127776	0.378349	3	-0.0875714	0.136798	-0.35569	0.180547	0.522073	3	-0.0907773	0.141631	-0.368368	0.186813	0.521559
X-06226	MR-Egger intercept	4	0.0164441	0.0168046	-0.0164922	0.0493805	0.327801	3	0.0135676	0.0188979	-0.0234715	0.0506068	0.472792	3	0.0141223	0.019738	-0.0245635	0.0528081	0.474308
X-06246	Inverse-variance weighted	4	0.0137638	0.00966967	-0.00518839	0.032716	0.15462	3	0.00820959	0.0124216	-0.0161362	0.0325554	0.508667	3	0.00815663	0.012313	-0.0159765	0.0322897	0.50769
X-06246	Weighted median	4	0.0188627	0.0113088	-0.00330222	0.0410276	0.0953235	3	0.00972192	0.0147115	-0.0191121	0.0385559	0.508716	3	0.00964371	0.0145804	-0.0189334	0.0382208	0.508346
X-06246	MR-Egger	4	-0.14544	0.149722	-0.43889	0.14801	0.331349	3	-0.149548	0.187083	-0.516225	0.217128	0.424077	3	-0.156899	0.19335	-0.535859	0.222061	0.417092
X-06246	MR-Egger intercept	4	0.022422	0.0210425	-0.0188206	0.0636646	0.286625	3	0.0217257	0.0257074	-0.0286599	0.0721113	0.398047	3	0.0229271	0.0268028	-0.0296055	0.0754597	0.392331
X-06267	Inverse-variance weighted	4	0.0108929	0.0111887	-0.0110366	0.0328223	0.330275	3	0.00914433	0.0132403	-0.0168061	0.0350948	0.489789	3	0.00905572	0.0131246	-0.0166679	0.0347794	0.490205
X-06267	Weighted median	4	0.00874145	0.0127815	-0.0163099	0.0337928	0.49403	3	0.00733519	0.0153593	-0.0227684	0.0374388	0.632954	3	0.00724443	0.0152451	-0.0226354	0.0371243	0.634647
X-06267	MR-Egger	4	-0.030238	0.164559	-0.352768	0.292292	0.854208	3	0.000961844	0.189843	-0.371124	0.373047	0.995958	3	-0.00131905	0.196498	-0.386447	0.383809	0.994644
X-06267	MR-Egger intercept	4	0.00584769	0.0233417	-0.0399011	0.0515965	0.802181	3	0.00113225	0.0262055	-0.0502297	0.0524942	0.965537	3	0.00144797	0.0273633	-0.052183	0.055079	0.957798
X-06307	Inverse-variance weighted	4	-0.0311226	0.0126842	-0.0559832	-0.00626196	0.0141417	3	-0.0298135	0.0150455	-0.0593022	-0.000324824	0.0475292	3	-0.0295664	0.014914	-0.0587974	-0.00033543	0.0474284
X-06307	Weighted median	4	-0.0308214	0.0146898	-0.0596128	-0.00202995	0.0358917	3	-0.0276766	0.0173878	-0.0617562	0.00640287	0.111446	3	-0.0275361	0.0172492	-0.061344	0.00627178	0.110407
X-06307	MR-Egger	4	-0.0029101	0.18535	-0.36619	0.36037	0.987473	3	0.0066488	0.214118	-0.413015	0.426313	0.975228	3	0.00557035	0.221683	-0.42892	0.44006	0.979953
X-06307	MR-Egger intercept	4	-0.004013	0.0263028	-0.0555655	0.0475395	0.878738	3	-0.00504956	0.0295793	-0.0630239	0.0529248	0.86445	3	-0.00490787	0.0308943	-0.0654596	0.0556438	0.873779
X-06350	Inverse-variance weighted	4	0.0388524	0.0118936	0.0155414	0.0621633	0.0010882	3	0.0369827	0.0140764	0.00939346	0.0645719	0.00860694	3	0.0367081	0.0139534	0.00936004	0.0640562	0.0085191
X-06350	Weighted median	4	0.0465703	0.0145244	0.018103	0.0750376	0.00134431	3	0.0444405	0.0173233	0.0104876	0.0783935	0.0103067	3	0.0442931	0.017196	0.0105895	0.0779966	0.0100015
X-06350	MR-Egger	4	-0.176133	0.174857	-0.518846	0.16658	0.313791	3	-0.212362	0.201739	-0.607764	0.183039	0.292498	3	-0.220333	0.208814	-0.629601	0.188935	0.29135
X-06350	MR-Egger intercept	4	0.030566	0.024803	-0.018047	0.079179	0.217819	3	0.0345048	0.0278489	-0.0200782	0.0890877	0.215347	3	0.0358762	0.0290797	-0.0211191	0.0928714	0.217309
X-06351	Inverse-variance weighted	4	0.0389728	0.0138369	0.0118529	0.0660927	0.0048538	3	0.0330635	0.0166001	0.000527983	0.0655991	0.0463963	3	0.0327968	0.0164489	0.000557612	0.065036	0.046167
X-06351	Weighted median	4	0.044138	0.0163669	0.0120595	0.0762166	0.00700122	3	0.041743	0.0202602	0.00203376	0.0814522	0.0393654	3	0.0415881	0.0200815	0.00222909	0.0809472	0.038362
X-06351	MR-Egger	4	-0.158114	0.211648	-0.572937	0.256709	0.455027	3	-0.163495	0.249202	-0.651921	0.324931	0.511775	3	-0.170109	0.258128	-0.67603	0.335813	0.50989
X-06351	MR-Egger intercept	4	0.0278229	0.0298146	-0.0306127	0.0862585	0.350718	3	0.0269465	0.0340875	-0.0398637	0.0937567	0.42923	3	0.0280669	0.035633	-0.0417725	0.0979064	0.430892
myo-inositol	Inverse-variance weighted	4	-0.00246437	0.00703544	-0.0162536	0.0113248	0.726129	3	-0.00502743	0.00857428	-0.0218327	0.0117779	0.557649	3	-0.00496509	0.00849937	-0.0216235	0.0116934	0.559105
myo-inositol	Weighted median	4	-0.000156315	0.00828584	-0.0163963	0.0160836	0.984949	3	-0.00246019	0.00992419	-0.0219112	0.0169909	0.804213	3	-0.00236575	0.00984117	-0.0216541	0.0169226	0.810025
myo-inositol	MR-Egger	4	-0.0802175	0.106635	-0.289218	0.128783	0.451893	3	-0.120434	0.133388	-0.381869	0.141002	0.366588	3	-0.124536	0.137745	-0.394512	0.145441	0.365943
myo-inositol	MR-Egger intercept	4	0.0108988	0.0149147	-0.0183334	0.0401311	0.464935	3	0.0158501	0.0182819	-0.0199817	0.051682	0.38595	3	0.0165641	0.0190456	-0.0207645	0.0538927	0.384459
glucose	Inverse-variance weighted	4	-0.0113613	0.00598977	-0.0231011	0.000378421	0.0578562	3	-0.0136844	0.00710483	-0.0276096	0.000240811	0.0540956	3	-0.0135728	0.00704274	-0.0273763	0.000230735	0.0539545
glucose	Weighted median	4	-0.0111137	0.00695211	-0.0247396	0.00251218	0.109908	3	-0.0125022	0.00823692	-0.0286462	0.00364187	0.129059	3	-0.0124413	0.00817237	-0.0284589	0.00357621	0.127917
glucose	MR-Egger	4	0.0134253	0.0875265	-0.158123	0.184974	0.878094	3	0.00714654	0.101111	-0.191028	0.205321	0.943652	3	0.00658771	0.104683	-0.198588	0.211763	0.949822
glucose	MR-Egger intercept	4	-0.0035257	0.0124208	-0.0278699	0.0208185	0.776521	3	-0.00288482	0.013968	-0.0302616	0.024492	0.836377	3	-0.002816	0.014589	-0.0314099	0.0257779	0.846941
1	Inverse-variance weighted	4	-0.25109	0.0124343	-0.275461	-0.226719	1.12072e-90	3	-0.263167	0.0128457	-0.288345	-0.23799	2.8247e-93	3	-0.260933	0.0127335	-0.28589	-0.235976	2.54156e-93
1	Weighted median	4	-0.254802	0.0254614	-0.304705	-0.204898	1.41458e-23	3	-0.273607	0.0306862	-0.33375	-0.213463	4.82239e-19	3	-0.271617	0.0301567	-0.330723	-0.212511	2.12034e-19
1	MR-Egger	4	0.0565878	0.168536	-0.273736	0.386912	0.73705	3	0.127024	0.193044	-0.251335	0.505382	0.510535	3	0.132255	0.199523	-0.258802	0.523312	0.507423
1	MR-Egger intercept	4	-0.0436193	0.0238422	-0.090349	0.00311053	0.0673246	3	-0.053746	0.0265314	-0.105747	-0.00174537	0.0427905	3	-0.0546264	0.0276636	-0.108846	-0.0004068	0.0483057
2-hydroxybutyrate (AHB)	Inverse-variance weighted	4	0.000949966	0.0117863	-0.0221507	0.0240507	0.935761	3	0.00114666	0.0139094	-0.0261153	0.0284086	0.934299	3	0.00116193	0.013789	-0.0258639	0.0281878	0.932845
2-hydroxybutyrate (AHB)	Weighted median	4	0.00363054	0.0135958	-0.0230168	0.0302779	0.789443	3	0.00595359	0.0160312	-0.025467	0.0373742	0.710359	3	0.00593773	0.0159129	-0.025251	0.0371264	0.709045
2-hydroxybutyrate (AHB)	MR-Egger	4	-0.0812181	0.172047	-0.418425	0.255988	0.636878	3	-0.133188	0.197878	-0.521021	0.254645	0.500895	3	-0.138426	0.204792	-0.539812	0.26296	0.499083
2-hydroxybutyrate (AHB)	MR-Egger intercept	4	0.0117008	0.0244422	-0.036205	0.0596067	0.632142	3	0.018627	0.0273701	-0.0350175	0.0722715	0.49615	3	0.0195206	0.0285741	-0.0364836	0.0755247	0.494507
3-methyl-2-oxobutyrate	Inverse-variance weighted	4	-0.00940899	0.00775147	-0.0246016	0.00578361	0.224812	3	-0.0108223	0.00919449	-0.0288432	0.00719854	0.239177	3	-0.0107238	0.00911413	-0.0285872	0.00713953	0.239349
3-methyl-2-oxobutyrate	Weighted median	4	-0.00915273	0.00889489	-0.0265864	0.00828094	0.303486	3	-0.0120088	0.0105825	-0.0327501	0.00873256	0.256469	3	-0.0118527	0.0105022	-0.0324367	0.0087313	0.259072
3-methyl-2-oxobutyrate	MR-Egger	4	-0.0575754	0.11327	-0.27958	0.164429	0.61124	3	-0.0469251	0.13085	-0.303386	0.209536	0.719881	3	-0.0493997	0.135473	-0.314921	0.216122	0.715375
3-methyl-2-oxobutyrate	MR-Egger intercept	4	0.00685128	0.0160739	-0.024653	0.0383556	0.669936	3	0.00499977	0.0180762	-0.030429	0.0404285	0.782092	3	0.00540221	0.0188798	-0.0316016	0.042406	0.774774
1	Inverse-variance weighted	4	-0.0110833	0.0278909	-0.0657484	0.0435818	0.691088	3	-0.0190389	0.0332476	-0.0842031	0.0461252	0.566888	3	-0.0189198	0.0329517	-0.0835039	0.0456643	0.565854
1	Weighted median	4	-0.00987913	0.031599	-0.071812	0.0520537	0.754554	3	-0.0288108	0.0387061	-0.104673	0.0470518	0.456666	3	-0.0288273	0.0384165	-0.104122	0.0464677	0.453021
1	MR-Egger	4	0.10538	0.415153	-0.708305	0.919066	0.799623	3	0.246817	0.482914	-0.699676	1.19331	0.609281	3	0.25635	0.500054	-0.723738	1.23644	0.6082
1	MR-Egger intercept	4	-0.0165103	0.0587208	-0.131601	0.0985804	0.778583	3	-0.0366538	0.0664217	-0.166838	0.0935304	0.581062	3	-0.0382849	0.069397	-0.1743	0.0977307	0.581168
1-palmitoylglycerol (1-monopalmitin)	Inverse-variance weighted	4	0.016407	0.011229	-0.00560142	0.0384155	0.14398	3	0.0166282	0.0130748	-0.00899788	0.0422543	0.203452	3	0.0165144	0.0129605	-0.00888781	0.0419165	0.202591
1-palmitoylglycerol (1-monopalmitin)	Weighted median	4	0.0202127	0.0135895	-0.00642223	0.0468476	0.136916	3	0.0218202	0.0160697	-0.00967579	0.0533163	0.174511	3	0.0215918	0.0159192	-0.00960925	0.0527929	0.174992
1-palmitoylglycerol (1-monopalmitin)	MR-Egger	4	-0.195907	0.173417	-0.535799	0.143984	0.258607	3	-0.22791	0.19839	-0.616747	0.160927	0.250639	3	-0.238378	0.204996	-0.640162	0.163406	0.244893
1-palmitoylglycerol (1-monopalmitin)	MR-Egger intercept	4	0.0300833	0.0245203	-0.0179755	0.0781421	0.21987	3	0.0336548	0.0272442	-0.0197429	0.0870526	0.216719	3	0.0353829	0.0283996	-0.0202792	0.0910451	0.212802
1-oleoylglycerol (1-monoolein)	Inverse-variance weighted	4	-0.0224005	0.020036	-0.0616703	0.0168694	0.263562	3	-0.0178694	0.0238894	-0.0646917	0.0289529	0.454456	3	-0.0177032	0.0236763	-0.0641079	0.0287016	0.454632
1-oleoylglycerol (1-monoolein)	Weighted median	4	-0.0234182	0.0227273	-0.0679629	0.0211264	0.302821	3	-0.015163	0.027807	-0.0696638	0.0393378	0.585551	3	-0.0150231	0.0275973	-0.0691128	0.0390666	0.586189
1-oleoylglycerol (1-monoolein)	MR-Egger	4	0.0609547	0.299123	-0.525316	0.647225	0.838527	3	-0.00207795	0.348199	-0.684536	0.68038	0.995238	3	0.000165744	0.360555	-0.706509	0.70684	0.999633
1-oleoylglycerol (1-monoolein)	MR-Egger intercept	4	-0.0118119	0.0422923	-0.0947032	0.0710794	0.780021	3	-0.00217594	0.0478661	-0.0959919	0.09164	0.963742	3	-0.00248386	0.0500106	-0.100503	0.0955352	0.960388
1-stearoylglycerol (1-monostearin)	Inverse-variance weighted	4	0.0293801	0.010026	0.00972956	0.0490307	0.00338528	3	0.027569	0.0121134	0.00382712	0.0513109	0.0228518	3	0.027336	0.0120014	0.00381357	0.0508584	0.0227431
1-stearoylglycerol (1-monostearin)	Weighted median	4	0.0321419	0.0117663	0.00908033	0.0552036	0.00630114	3	0.0316621	0.014613	0.00302112	0.060303	0.0302573	3	0.0313969	0.0144478	0.00307977	0.0597141	0.0297706
1-stearoylglycerol (1-monostearin)	MR-Egger	4	-0.0547685	0.154904	-0.358375	0.248838	0.723666	3	-0.0919535	0.184272	-0.453119	0.269212	0.617772	3	-0.0954617	0.190968	-0.469752	0.278829	0.617158
1-stearoylglycerol (1-monostearin)	MR-Egger intercept	4	0.0118549	0.0217771	-0.0308275	0.0545373	0.586185	3	0.016341	0.0251389	-0.0329303	0.0656123	0.515674	3	0.0169422	0.0262955	-0.0345961	0.0684806	0.51938
X-08402	Inverse-variance weighted	4	-0.0135951	0.00960013	-0.0324111	0.00522076	0.156734	3	-0.0161878	0.0115744	-0.0388733	0.00649759	0.161936	3	-0.0160001	0.0114681	-0.0384772	0.00647692	0.16296
X-08402	Weighted median	4	-0.00713195	0.0113713	-0.0294193	0.0151554	0.530536	3	-0.006743	0.0147332	-0.0356195	0.0221335	0.647187	3	-0.00667361	0.0145698	-0.0352299	0.0218826	0.64692
X-08402	MR-Egger	4	-0.176116	0.147203	-0.464628	0.112397	0.231536	3	-0.234426	0.174323	-0.576093	0.10724	0.178696	3	-0.24365	0.180632	-0.597683	0.110383	0.177378
X-08402	MR-Egger intercept	4	0.0229207	0.0207162	-0.0176824	0.0635238	0.268548	3	0.0298818	0.0238161	-0.0167969	0.0765606	0.209592	3	0.0314535	0.0249069	-0.0173632	0.0802701	0.206647
2-hydroxyisobutyrate	Inverse-variance weighted	4	0.0404807	0.00950026	0.0218606	0.0591009	2.03502e-05	3	0.0366394	0.011997	0.0131258	0.060153	0.00225771	3	0.0363127	0.0118921	0.0130046	0.0596209	0.0022618
2-hydroxyisobutyrate	Weighted median	4	0.0423403	0.0113742	0.0200472	0.0646334	0.000197276	3	0.0346536	0.0142718	0.0066813	0.0626259	0.0151778	3	0.0343916	0.0141442	0.00666953	0.0621137	0.0150364
2-hydroxyisobutyrate	MR-Egger	4	-0.0133004	0.147076	-0.301564	0.274963	0.927944	3	0.00263862	0.181122	-0.352354	0.357631	0.988377	3	-0.000340677	0.187178	-0.367202	0.366521	0.998548
2-hydroxyisobutyrate	MR-Egger intercept	4	0.00758125	0.0206893	-0.032969	0.0481315	0.714041	3	0.00468144	0.0248833	-0.0440888	0.0534517	0.85077	3	0.00509027	0.0259419	-0.0457549	0.0559354	0.844439
X-08766	Inverse-variance weighted	4	-0.00569301	0.0124912	-0.0301753	0.0187893	0.648561	3	-0.00906995	0.0147455	-0.0379706	0.0198307	0.538489	3	-0.00895961	0.0146177	-0.0376098	0.0196906	0.539924
X-08766	Weighted median	4	-0.001588	0.0149017	-0.0307948	0.0276188	0.915134	3	-0.00784673	0.0175391	-0.0422228	0.0265293	0.654597	3	-0.00767955	0.0174152	-0.0418127	0.0264536	0.659236
X-08766	MR-Egger	4	-0.210909	0.182346	-0.568302	0.146483	0.247419	3	-0.216419	0.209774	-0.627569	0.19473	0.302223	3	-0.226483	0.217109	-0.65201	0.199043	0.296867
X-08766	MR-Egger intercept	4	0.0292213	0.0259037	-0.0215492	0.0799917	0.25929	3	0.0287494	0.0290136	-0.0281163	0.085615	0.321738	3	0.0304175	0.0302906	-0.0289511	0.089786	0.315288
4-methyl-2-oxopentanoate	Inverse-variance weighted	4	-0.0261628	0.00810381	-0.042046	-0.0102796	0.00124461	3	-0.0283651	0.00961242	-0.0472051	-0.00952514	0.00316867	3	-0.0281085	0.00952841	-0.0467839	-0.00943318	0.00317806
4-methyl-2-oxopentanoate	Weighted median	4	-0.0251335	0.00959947	-0.0439481	-0.00631886	0.00883912	3	-0.0287516	0.0114033	-0.0511016	-0.00640147	0.0116911	3	-0.0283794	0.0113144	-0.0505552	-0.00620364	0.0121327
4-methyl-2-oxopentanoate	MR-Egger	4	-0.0697243	0.118418	-0.30182	0.162371	0.555997	3	-0.0899962	0.136798	-0.358115	0.178122	0.510617	3	-0.0941296	0.141631	-0.37172	0.183461	0.506298
4-methyl-2-oxopentanoate	MR-Egger intercept	4	0.00619628	0.0168046	-0.02674	0.0391326	0.712332	3	0.0085351	0.0188979	-0.0285041	0.0455743	0.651526	3	0.00922177	0.019738	-0.029464	0.0479076	0.640351
phenyllactate (PLA)	Inverse-variance weighted	4	-0.0276521	0.00951317	-0.0462976	-0.00900667	0.00365238	3	-0.0323836	0.0112841	-0.0545002	-0.0102671	0.00410687	3	-0.0320933	0.0111855	-0.0540166	-0.0101701	0.00411531
phenyllactate (PLA)	Weighted median	4	-0.0295185	0.0112819	-0.0516307	-0.00740638	0.00888503	3	-0.031705	0.0132207	-0.0576171	-0.00579286	0.016479	3	-0.0312999	0.0131157	-0.0570061	-0.00559364	0.0170119
phenyllactate (PLA)	MR-Egger	4	-0.0499827	0.139013	-0.322443	0.222477	0.71918	3	-0.0751414	0.160589	-0.389889	0.239606	0.639847	3	-0.0782022	0.166262	-0.40407	0.247665	0.638101
phenyllactate (PLA)	MR-Egger intercept	4	0.00317634	0.0197271	-0.035488	0.0418407	0.872082	3	0.0059214	0.0221845	-0.0375594	0.0494022	0.789533	3	0.00644045	0.0231707	-0.0389733	0.0518542	0.781046
homocitrulline	Inverse-variance weighted	4	-0.0197232	0.01464	-0.0484171	0.00897068	0.177912	3	-0.0213192	0.018079	-0.0567535	0.014115	0.238309	3	-0.0211424	0.017921	-0.056267	0.0139822	0.238099
homocitrulline	Weighted median	4	-0.0185452	0.0167898	-0.0514526	0.0143622	0.269353	3	-0.0213304	0.0208237	-0.0621442	0.0194833	0.305678	3	-0.0212361	0.0206628	-0.0617345	0.0192623	0.30407
homocitrulline	MR-Egger	4	-0.0966876	0.22173	-0.531271	0.337896	0.662793	3	-0.0160522	0.265085	-0.53561	0.503505	0.951714	3	-0.0185977	0.274177	-0.555974	0.518779	0.94592
homocitrulline	MR-Egger intercept	4	0.0108945	0.0313181	-0.0504878	0.0722769	0.72794	3	-0.000727161	0.0365123	-0.07229	0.0708357	0.984111	3	-0.000354341	0.0380975	-0.0750241	0.0743154	0.992579
aspartylphenylalanine	Inverse-variance weighted	4	-0.0552572	0.0195836	-0.0936404	-0.016874	0.00477846	3	-0.0605063	0.0229543	-0.105496	-0.0155168	0.00839017	3	-0.0599695	0.0227537	-0.104566	-0.0153731	0.00839896
aspartylphenylalanine	Weighted median	4	-0.0579897	0.0227869	-0.102651	-0.0133282	0.0109319	3	-0.0621472	0.0268189	-0.114711	-0.00958306	0.020488	3	-0.061786	0.0266004	-0.113922	-0.00965021	0.0201927
aspartylphenylalanine	MR-Egger	4	-0.120462	0.294212	-0.697106	0.456182	0.682216	3	-0.0852633	0.335958	-0.743729	0.573202	0.799657	3	-0.0874813	0.3475	-0.768568	0.593606	0.801238
aspartylphenylalanine	MR-Egger intercept	4	0.00926467	0.0417105	-0.0724863	0.0910157	0.824222	3	0.00341855	0.0462821	-0.0872926	0.0941297	0.941119	3	0.00383171	0.0482941	-0.090823	0.0984864	0.936761
levulinate (4-oxovalerate)	Inverse-variance weighted	4	0.0246576	0.00731598	0.0103185	0.0389967	0.000750654	3	0.0281264	0.00896708	0.0105513	0.0457016	0.00170899	3	0.0278547	0.00888053	0.0104492	0.0452603	0.00170914
levulinate (4-oxovalerate)	Weighted median	4	0.0272586	0.00864381	0.010317	0.0442001	0.00161306	3	0.0280396	0.0105617	0.0073391	0.04874	0.00793449	3	0.0276263	0.0104526	0.00713953	0.0481131	0.00821749
levulinate (4-oxovalerate)	MR-Egger	4	0.000342887	0.120129	-0.235106	0.235791	0.997723	3	0.0258902	0.149146	-0.266431	0.318212	0.862188	3	0.0267189	0.15477	-0.276624	0.330062	0.862937
levulinate (4-oxovalerate)	MR-Egger intercept	4	0.00340087	0.0167711	-0.0294699	0.0362717	0.839306	3	0.000302621	0.0201469	-0.0391845	0.0397897	0.988016	3	0.000155177	0.0211102	-0.0412201	0.0415305	0.994135
palmitoylcarnitine	Inverse-variance weighted	4	-0.00573792	0.0119795	-0.0292174	0.0177416	0.631956	3	-0.00740553	0.0142097	-0.035256	0.0204449	0.602254	3	-0.00734913	0.0140855	-0.0349562	0.0202579	0.601843
palmitoylcarnitine	Weighted median	4	-0.00610479	0.0138155	-0.0331826	0.020973	0.658575	3	-0.00614595	0.0162977	-0.0380889	0.025797	0.706096	3	-0.00608905	0.0161736	-0.0377887	0.0256106	0.706559
palmitoylcarnitine	MR-Egger	4	0.0883096	0.175053	-0.254788	0.431407	0.613929	3	0.0601017	0.202223	-0.336247	0.456451	0.766309	3	0.0635008	0.209367	-0.346851	0.473852	0.761662
palmitoylcarnitine	MR-Egger intercept	4	-0.0133775	0.0248415	-0.062066	0.035311	0.590222	3	-0.00934888	0.027936	-0.0641024	0.0454047	0.737886	3	-0.00989626	0.0291779	-0.067084	0.0472915	0.734482
X-08988	Inverse-variance weighted	4	0.0283509	0.00916083	0.010396	0.0463058	0.00196947	3	0.0290558	0.0108662	0.00775844	0.0503532	0.00749613	3	0.0288128	0.0107712	0.00770155	0.0499241	0.0074735
X-08988	Weighted median	4	0.0267909	0.0106742	0.00586981	0.047712	0.0120776	3	0.0281293	0.0127837	0.00307369	0.0531849	0.0277784	3	0.0279157	0.0126773	0.00306876	0.0527627	0.027663
X-08988	MR-Egger	4	-0.0259846	0.133864	-0.288353	0.236384	0.846088	3	-0.0138593	0.154641	-0.31695	0.289231	0.928587	3	-0.0138926	0.160104	-0.327691	0.299906	0.930853
X-08988	MR-Egger intercept	4	0.00772879	0.0189965	-0.0295036	0.0449612	0.684115	3	0.00594319	0.0213628	-0.0359272	0.0478135	0.780857	3	0.00596506	0.0223125	-0.0377667	0.0496968	0.789207
X-09026	Inverse-variance weighted	4	-0.00349557	0.00907393	-0.0212801	0.014289	0.700066	3	-0.00251445	0.0107317	-0.0235481	0.0185192	0.81475	3	-0.00248467	0.0106379	-0.0233345	0.0183652	0.81532
X-09026	Weighted median	4	-0.00570895	0.0104402	-0.0261714	0.0147535	0.584501	3	-0.00444808	0.0124686	-0.028886	0.0199899	0.721284	3	-0.00437305	0.0123747	-0.0286271	0.019881	0.7238
X-09026	MR-Egger	4	-0.0410688	0.133666	-0.303049	0.220912	0.758653	3	-0.0743368	0.154154	-0.376473	0.2278	0.629647	3	-0.0784792	0.159548	-0.391187	0.234229	0.6228
X-09026	MR-Egger intercept	4	0.00534127	0.0189576	-0.0318149	0.0424975	0.778137	3	0.00993649	0.0212752	-0.0317621	0.0516351	0.640467	3	0.0106043	0.0222137	-0.0329338	0.0541423	0.633095
X-09108	Inverse-variance weighted	4	0.0415389	0.00896635	0.0239652	0.0591126	3.60828e-06	3	0.0418223	0.0105648	0.0211157	0.0625289	7.5376e-05	3	0.0414918	0.0104735	0.020964	0.0620196	7.44547e-05
X-09108	Weighted median	4	0.0447638	0.0110524	0.0231016	0.066426	5.11825e-05	3	0.0451924	0.0130246	0.0196647	0.0707201	0.00052088	3	0.0449447	0.0129182	0.0196254	0.0702639	0.000502964
X-09108	MR-Egger	4	-0.0914491	0.130848	-0.347906	0.165008	0.484617	3	-0.109981	0.150289	-0.404542	0.184581	0.464295	3	-0.113909	0.155523	-0.418728	0.19091	0.463908
X-09108	MR-Egger intercept	4	0.0189443	0.0185956	-0.0175024	0.055391	0.308321	3	0.0210574	0.0207958	-0.0197017	0.0618164	0.311262	3	0.0217399	0.0217075	-0.0208061	0.0642858	0.31659
cholate	Inverse-variance weighted	4	-0.168778	0.0390062	-0.245228	-0.092327	1.5119e-05	3	-0.172235	0.0472879	-0.264917	-0.0795523	0.000270253	3	-0.170701	0.0468705	-0.262566	-0.0788367	0.000270554
cholate	Weighted median	4	-0.170202	0.0464984	-0.261337	-0.0790672	0.000251829	3	-0.172414	0.0565824	-0.283314	-0.061515	0.00231031	3	-0.170128	0.0561193	-0.28012	-0.0601363	0.00243306
cholate	MR-Egger	4	-0.187402	0.585393	-1.33475	0.959946	0.748869	3	-0.271632	0.690276	-1.62455	1.08128	0.693942	3	-0.282727	0.71439	-1.68291	1.11745	0.692283
cholate	MR-Egger intercept	4	0.00263804	0.082732	-0.159514	0.16479	0.974563	3	0.0137116	0.0949984	-0.172482	0.199905	0.885236	3	0.0155883	0.0991927	-0.178826	0.210002	0.875126
X-09706	Inverse-variance weighted	4	0.0419092	0.00917076	0.0239348	0.0598835	4.88039e-06	3	0.0418397	0.0110302	0.0202209	0.0634586	0.000148728	3	0.0414382	0.0109297	0.0200164	0.0628599	0.00014983
X-09706	Weighted median	4	0.0403535	0.010962	0.0188683	0.0618387	0.000232132	3	0.0384709	0.0138619	0.0113021	0.0656397	0.00551515	3	0.0380348	0.0137518	0.0110817	0.0649878	0.00567827
X-09706	MR-Egger	4	0.111516	0.139468	-0.161837	0.384869	0.423955	3	0.144612	0.16439	-0.177586	0.466809	0.379027	3	0.149877	0.170314	-0.183932	0.483686	0.378857
X-09706	MR-Egger intercept	4	-0.00982896	0.0196513	-0.0483447	0.0286868	0.616956	3	-0.0140956	0.0224959	-0.0581868	0.0299955	0.530931	3	-0.0150068	0.0235211	-0.0611074	0.0310937	0.523464
X-10395	Inverse-variance weighted	4	-0.0163153	0.00880849	-0.0335797	0.000948983	0.063993	3	-0.016599	0.0104483	-0.0370773	0.00387922	0.112131	3	-0.0164512	0.010357	-0.0367505	0.00384804	0.112191
X-10395	Weighted median	4	-0.0175369	0.0101161	-0.0373642	0.00229034	0.0829963	3	-0.0180893	0.0120431	-0.0416934	0.00551487	0.133087	3	-0.0178612	0.0119492	-0.0412813	0.00555886	0.134978
X-10395	MR-Egger	4	-0.0311144	0.128715	-0.283392	0.221163	0.808989	3	-0.0469251	0.148693	-0.338358	0.244508	0.752318	3	-0.0493997	0.153946	-0.351129	0.252329	0.748294
X-10395	MR-Egger intercept	4	0.00210504	0.0182658	-0.0336953	0.0379054	0.908251	3	0.00419977	0.0205412	-0.0360602	0.0444597	0.837997	3	0.00460221	0.0214544	-0.0374476	0.046652	0.830148
X-10429	Inverse-variance weighted	4	0.00500215	0.0100918	-0.0147774	0.0247817	0.62013	3	0.00355571	0.0122232	-0.0204014	0.0275128	0.771129	3	0.00354611	0.0121094	-0.0201878	0.0272801	0.769645
X-10429	Weighted median	4	0.0090845	0.0116272	-0.0137045	0.0318735	0.434619	3	0.00885821	0.0145812	-0.0197204	0.0374368	0.543512	3	0.00875403	0.0144238	-0.019516	0.0370241	0.543906
X-10429	MR-Egger	4	-0.117376	0.157383	-0.425841	0.191089	0.45579	3	-0.148887	0.188306	-0.51796	0.220186	0.429139	3	-0.155554	0.195184	-0.538108	0.227	0.425474
X-10429	MR-Egger intercept	4	0.0172188	0.0220985	-0.0260935	0.0605312	0.435871	3	0.0208052	0.0256455	-0.0294592	0.0710695	0.417217	3	0.021914	0.0268322	-0.0306763	0.0745042	0.414098
X-10500	Inverse-variance weighted	4	-0.00351684	0.00598977	-0.0152566	0.0082229	0.557109	3	-0.00365258	0.00710483	-0.0175778	0.0102726	0.607183	3	-0.00360414	0.00704274	-0.0174077	0.0101994	0.608824
X-10500	Weighted median	4	-0.00415369	0.00707653	-0.0180234	0.00971605	0.557226	3	-0.0024098	0.00847898	-0.0190283	0.0142087	0.77625	3	-0.00234359	0.00842029	-0.0188471	0.0141599	0.780762
X-10500	MR-Egger	4	-0.112952	0.0875265	-0.284501	0.058597	0.196882	3	-0.106031	0.101111	-0.304206	0.0921432	0.294335	3	-0.110866	0.104683	-0.316042	0.09431	0.289574
X-10500	MR-Egger intercept	4	0.0155662	0.0124208	-0.008778	0.0399105	0.210117	3	0.0141781	0.013968	-0.0131986	0.0415549	0.310085	3	0.0149822	0.014589	-0.0136116	0.0435761	0.304442
X-10506	Inverse-variance weighted	4	0.0267159	0.0086138	0.0098332	0.0435987	0.00192525	3	0.0270267	0.0101467	0.00713959	0.0469138	0.00773087	3	0.0267877	0.0100591	0.00707224	0.0465031	0.00774393
X-10506	Weighted median	4	0.0265806	0.0100149	0.0069517	0.0462095	0.00795206	3	0.02682	0.0117521	0.00378641	0.0498536	0.0224802	3	0.0265852	0.0116559	0.00374009	0.0494303	0.0225579
X-10506	MR-Egger	4	0.0355845	0.125697	-0.210778	0.281947	0.777103	3	0.0522918	0.14434	-0.23061	0.335193	0.717141	3	0.0540294	0.149364	-0.238718	0.346777	0.717553
X-10506	MR-Egger intercept	4	-0.00126341	0.0178647	-0.0362776	0.0337508	0.94362	3	-0.00350489	0.019974	-0.0426532	0.0356434	0.860708	3	-0.00381123	0.0208491	-0.0446748	0.0370523	0.854955
X-10510	Inverse-variance weighted	4	-0.0235577	0.00916083	-0.0415126	-0.00560283	0.0101238	3	-0.0228895	0.0108662	-0.0441869	-0.00159207	0.0351627	3	-0.022662	0.0107712	-0.0437733	-0.00155077	0.0353839
X-10510	Weighted median	4	-0.0218866	0.0107681	-0.0429916	-0.000781545	0.0420986	3	-0.0204501	0.0128816	-0.0456975	0.00479741	0.11239	3	-0.0201793	0.01279	-0.0452472	0.00488874	0.114627
X-10510	MR-Egger	4	-0.113937	0.133864	-0.376306	0.148432	0.394691	3	-0.150966	0.154641	-0.454056	0.152125	0.328949	3	-0.156196	0.160104	-0.469994	0.157602	0.329268
X-10510	MR-Egger intercept	4	0.0128557	0.0189965	-0.0243766	0.0500881	0.498568	3	0.0177369	0.0213628	-0.0241335	0.0596072	0.406387	3	0.0186519	0.0223125	-0.0250799	0.0623837	0.403189
1-linoleoylglycerol (1-monolinolein)	Inverse-variance weighted	4	0.0399017	0.0237987	-0.00674288	0.0865463	0.093614	3	0.0408454	0.0281911	-0.0144081	0.0960989	0.147372	3	0.0404523	0.0279425	-0.014314	0.0952187	0.147701
1-linoleoylglycerol (1-monolinolein)	Weighted median	4	0.0353983	0.0273287	-0.0181649	0.0889615	0.195223	3	0.0406814	0.0332652	-0.0245173	0.10588	0.221353	3	0.0403579	0.0330182	-0.0243566	0.105072	0.221597
1-linoleoylglycerol (1-monolinolein)	MR-Egger	4	0.0525169	0.352436	-0.638246	0.74328	0.881545	3	0.0790881	0.405777	-0.716221	0.874397	0.845467	3	0.0762573	0.420112	-0.747147	0.899661	0.855962
1-linoleoylglycerol (1-monolinolein)	MR-Egger intercept	4	-0.00179236	0.04996	-0.0997122	0.0961274	0.971381	3	-0.00528368	0.0559273	-0.114899	0.104332	0.924733	3	-0.00498985	0.0584181	-0.119487	0.109507	0.93193
indoleacetate	Inverse-variance weighted	4	-0.0289327	0.012246	-0.0529344	-0.004931	0.0181459	3	-0.0309001	0.0144944	-0.0593086	-0.00249148	0.0330187	3	-0.0306566	0.0143678	-0.0588169	-0.00249631	0.0328667
indoleacetate	Weighted median	4	-0.026848	0.0141604	-0.0546019	0.000905887	0.0579613	3	-0.0260256	0.0169551	-0.0592571	0.00720584	0.124791	3	-0.0258227	0.0168188	-0.058787	0.00714164	0.1247
indoleacetate	MR-Egger	4	0.0407631	0.180005	-0.312041	0.393567	0.820848	3	0.0607992	0.207687	-0.34626	0.467858	0.769718	3	0.0611611	0.214972	-0.360177	0.482499	0.776022
indoleacetate	MR-Egger intercept	4	-0.00990927	0.0255337	-0.0599543	0.0401358	0.697952	3	-0.0126898	0.0286706	-0.0688832	0.0435037	0.658051	3	-0.0128156	0.029938	-0.071493	0.0458618	0.668599
hyodeoxycholate	Inverse-variance weighted	4	-0.0811975	0.0267453	-0.133617	-0.0287776	0.00239779	3	-0.0775375	0.0316125	-0.139497	-0.0155782	0.0141769	3	-0.0768542	0.0313304	-0.138261	-0.0154478	0.014166
hyodeoxycholate	Weighted median	4	-0.089434	0.0315178	-0.151208	-0.0276603	0.00454577	3	-0.084591	0.0373245	-0.157746	-0.0114363	0.023429	3	-0.0842263	0.0369987	-0.156742	-0.0117102	0.0228181
hyodeoxycholate	MR-Egger	4	-0.107323	0.408609	-0.908183	0.693537	0.792817	3	-0.147781	0.472328	-1.07353	0.777965	0.754374	3	-0.158336	0.488795	-1.11636	0.799684	0.745991
hyodeoxycholate	MR-Egger intercept	4	0.00369852	0.0577217	-0.109434	0.116831	0.948911	3	0.00965629	0.0647849	-0.11732	0.136632	0.881513	3	0.0112999	0.0676472	-0.121286	0.143886	0.867337
3-indoxyl sulfate	Inverse-variance weighted	4	-0.0416654	0.0147983	-0.0706695	-0.0126613	0.00486923	3	-0.0429792	0.0175531	-0.0773827	-0.00857571	0.0143444	3	-0.0426028	0.0173997	-0.0767056	-0.00850001	0.0143461
3-indoxyl sulfate	Weighted median	4	-0.0437492	0.0171969	-0.0774546	-0.0100439	0.0109587	3	-0.0465589	0.0204477	-0.0866358	-0.0064821	0.0227879	3	-0.0459859	0.0202857	-0.0857452	-0.00622662	0.0233957
3-indoxyl sulfate	MR-Egger	4	-0.0774157	0.216242	-0.501242	0.346411	0.72034	3	-0.0761369	0.249804	-0.565745	0.413471	0.760529	3	-0.080237	0.25863	-0.587142	0.426668	0.756379
3-indoxyl sulfate	MR-Egger intercept	4	0.00508519	0.0306866	-0.0550594	0.0652298	0.868382	3	0.00459192	0.0345092	-0.0630448	0.0722286	0.894143	3	0.00525671	0.0360433	-0.0653869	0.0759004	0.884044
N-acetylglycine	Inverse-variance weighted	4	-0.0212351	0.01826	-0.057024	0.0145539	0.244858	3	-0.021695	0.0217995	-0.0644212	0.0210313	0.319637	3	-0.0214853	0.0216026	-0.0638256	0.020855	0.319945
N-acetylglycine	Weighted median	4	-0.0189212	0.0207958	-0.0596802	0.0218378	0.362898	3	-0.0202361	0.0257889	-0.0707815	0.0303092	0.432639	3	-0.0200654	0.0255954	-0.0702315	0.0301006	0.433071
N-acetylglycine	MR-Egger	4	0.000459068	0.275943	-0.540379	0.541297	0.998673	3	-0.0281666	0.320833	-0.656987	0.600654	0.930042	3	-0.0262685	0.332335	-0.677634	0.625097	0.936999
N-acetylglycine	MR-Egger intercept	4	-0.0030709	0.0389753	-0.0794611	0.0733193	0.937199	3	0.000889566	0.0439988	-0.0853465	0.0871256	0.98387	3	0.000663341	0.0459917	-0.0894787	0.0908054	0.988492
bilirubin (Z	Inverse-variance weighted	4	0.0190186	0.0235647	-0.0271674	0.0652046	0.419622	3	0.0208672	0.0280766	-0.034162	0.0758963	0.457347	3	0.0206619	0.027827	-0.033878	0.0752017	0.457777
bilirubin (Z	Weighted median	4	0.0207092	0.0270005	-0.0322108	0.0736292	0.443085	3	0.0241851	0.032942	-0.0403801	0.0887502	0.462845	3	0.0238205	0.0326945	-0.0402595	0.0879006	0.466259
bilirubin (Z	MR-Egger	4	0.2572	0.350631	-0.430023	0.944423	0.463231	3	0.197627	0.407648	-0.601348	0.996602	0.62782	3	0.208344	0.422103	-0.618962	1.03565	0.621599
bilirubin (Z	MR-Egger intercept	4	-0.03377	0.0496008	-0.130986	0.0634459	0.495976	3	-0.0243739	0.0560782	-0.134285	0.0855373	0.663823	3	-0.026107	0.0585876	-0.140937	0.0887227	0.655882
creatine	Inverse-variance weighted	4	-0.017387	0.0136587	-0.0441576	0.0093836	0.203032	3	-0.012012	0.0163348	-0.0440277	0.0200036	0.462118	3	-0.0119145	0.0161858	-0.043638	0.0198091	0.461665
creatine	Weighted median	4	-0.0195556	0.0155785	-0.050089	0.0109778	0.209374	3	-0.0147659	0.0191532	-0.0523055	0.0227737	0.440745	3	-0.0145773	0.0189951	-0.051807	0.0226525	0.44283
creatine	MR-Egger	4	0.0815843	0.208896	-0.327844	0.491013	0.69613	3	0.0615461	0.243616	-0.415932	0.539024	0.80055	3	0.0643125	0.252398	-0.430378	0.559003	0.798873
creatine	MR-Egger intercept	4	-0.0139897	0.0294645	-0.0717391	0.0437597	0.634931	3	-0.0100876	0.0333338	-0.0754207	0.0552455	0.762176	3	-0.0105479	0.0348535	-0.0788594	0.0577637	0.762169
erythrose	Inverse-variance weighted	4	0.0155767	0.0138369	-0.0115432	0.0426966	0.260278	3	0.0163277	0.0166001	-0.0162078	0.0488633	0.325316	3	0.0162155	0.0164489	-0.0160237	0.0484548	0.324224
erythrose	Weighted median	4	0.0142908	0.0158425	-0.0167598	0.0453415	0.367025	3	0.0112003	0.020101	-0.0281971	0.0505976	0.577392	3	0.011147	0.0199377	-0.0279301	0.0502241	0.576098
erythrose	MR-Egger	4	-0.096511	0.211648	-0.511334	0.318312	0.648392	3	-0.123221	0.249202	-0.611647	0.365205	0.62098	3	-0.125201	0.258128	-0.631122	0.380721	0.627652
erythrose	MR-Egger intercept	4	0.0158235	0.0298146	-0.0426121	0.0742591	0.595606	3	0.0191309	0.0340875	-0.0476793	0.0859411	0.574641	3	0.0195615	0.035633	-0.050278	0.0894009	0.583026
threonate	Inverse-variance weighted	4	-0.0210921	0.0136532	-0.0478518	0.0056677	0.122384	3	-0.024277	0.0165022	-0.0566207	0.00806673	0.141254	3	-0.0240498	0.016359	-0.0561128	0.00801316	0.141526
threonate	Weighted median	4	-0.0187748	0.0157881	-0.0497189	0.0121693	0.23437	3	-0.02092	0.0191654	-0.0584836	0.0166435	0.275031	3	-0.0206255	0.0190076	-0.0578798	0.0166288	0.27787
threonate	MR-Egger	4	-0.0888717	0.199544	-0.479971	0.302228	0.65605	3	-0.131256	0.242679	-0.606899	0.344387	0.588603	3	-0.13662	0.250896	-0.628367	0.355127	0.586079
threonate	MR-Egger intercept	4	0.00956756	0.0281011	-0.0455095	0.0646446	0.733503	3	0.0147776	0.0334451	-0.0507735	0.0803287	0.6586	3	0.0156831	0.0348802	-0.0526809	0.0840471	0.652978
X-10810	Inverse-variance weighted	4	0.00157511	0.00986551	-0.0177609	0.0209112	0.87315	3	0.0011728	0.0117021	-0.0217629	0.0241085	0.920169	3	0.00116475	0.0115998	-0.0215704	0.0239	0.920018
X-10810	Weighted median	4	0.000670831	0.0112352	-0.0213497	0.0226913	0.952388	3	0.000737565	0.013316	-0.0253613	0.0268364	0.955828	3	0.000732081	0.0132133	-0.0251655	0.0266296	0.955816
X-10810	MR-Egger	4	-0.0389607	0.144161	-0.321512	0.24359	0.786962	3	-0.00621498	0.166536	-0.33262	0.32019	0.970231	3	-0.00628753	0.17242	-0.344224	0.331649	0.97091
X-10810	MR-Egger intercept	4	0.00576589	0.0204577	-0.0343305	0.0458623	0.778063	3	0.00102311	0.0230061	-0.044068	0.0461143	0.964529	3	0.00104093	0.0240289	-0.0460548	0.0481367	0.965447
cysteine	Inverse-variance weighted	4	-0.000214002	0.00896635	-0.0177877	0.0173597	0.980958	3	-0.000760393	0.0105648	-0.021467	0.0199462	0.942622	3	-0.000746973	0.0104735	-0.0212748	0.0197808	0.943143
cysteine	Weighted median	4	-0.00065266	0.0103155	-0.0208706	0.0195653	0.949551	3	-0.00299612	0.0121547	-0.0268189	0.0208266	0.805296	3	-0.00294457	0.0120653	-0.0265922	0.0207031	0.807191
cysteine	MR-Egger	4	-0.0485045	0.130848	-0.304962	0.207953	0.710865	3	-0.0654008	0.150289	-0.359962	0.22916	0.663441	3	-0.069115	0.155523	-0.373934	0.235704	0.65675
cysteine	MR-Egger intercept	4	0.00687904	0.0185956	-0.0295677	0.0433258	0.711436	3	0.00896662	0.0207958	-0.0317924	0.0497257	0.666342	3	0.00956437	0.0217075	-0.0329816	0.0521103	0.659501
pyroglutamylglycine	Inverse-variance weighted	4	0.0872339	0.030881	0.0267083	0.147759	0.00473036	3	0.0826278	0.0368719	0.0103602	0.154896	0.0250299	3	0.0819647	0.0365444	0.0103391	0.15359	0.0249044
pyroglutamylglycine	Weighted median	4	0.0891879	0.0361587	0.018318	0.160058	0.0136416	3	0.0853585	0.0441728	-0.0012186	0.171936	0.053313	3	0.0848693	0.0438198	-0.00101594	0.170755	0.0527723
pyroglutamylglycine	MR-Egger	4	-0.259433	0.461249	-1.16346	0.644599	0.573805	3	-0.242288	0.535988	-1.2928	0.808228	0.65124	3	-0.249506	0.55495	-1.33719	0.838175	0.652998
pyroglutamylglycine	MR-Egger intercept	4	0.0491564	0.0652571	-0.0787453	0.177058	0.451286	3	0.0448036	0.0737337	-0.0997119	0.189319	0.543426	3	0.046108	0.0770266	-0.104861	0.197077	0.549441
N-(2-furoyl)glycine	Inverse-variance weighted	4	0.0486709	0.0555518	-0.0602086	0.15755	0.380956	3	0.0533984	0.0657607	-0.0754902	0.182287	0.416785	3	0.0530722	0.0651871	-0.0746921	0.180837	0.415558
N-(2-furoyl)glycine	Weighted median	4	0.0533411	0.0642926	-0.07267	0.179352	0.40673	3	0.0818466	0.0771413	-0.0693477	0.233041	0.288692	3	0.0811617	0.0765683	-0.0689094	0.231233	0.289149
N-(2-furoyl)glycine	MR-Egger	4	-0.633798	0.821551	-2.24401	0.976411	0.440431	3	-0.718749	0.944329	-2.5696	1.1321	0.446584	3	-0.747756	0.977298	-2.66322	1.16771	0.444196
N-(2-furoyl)glycine	MR-Egger intercept	4	0.0970706	0.116585	-0.131432	0.325574	0.405062	3	0.106855	0.130365	-0.148656	0.362365	0.412411	3	0.111777	0.136104	-0.154982	0.378535	0.411498
DSGEGDFXAEGGGVR*	Inverse-variance weighted	4	-0.0247205	0.0244023	-0.0725481	0.0231072	0.311042	3	-0.0261741	0.0291053	-0.0832194	0.0308713	0.368499	3	-0.0259663	0.028852	-0.0825153	0.0305826	0.368129
DSGEGDFXAEGGGVR*	Weighted median	4	-0.0229693	0.0278253	-0.0775059	0.0315673	0.409098	3	-0.0270402	0.0332292	-0.0921681	0.0380878	0.415789	3	-0.026751	0.0329745	-0.0913799	0.0378778	0.417214
DSGEGDFXAEGGGVR*	MR-Egger	4	0.117562	0.359956	-0.587938	0.823062	0.743969	3	0.110128	0.416943	-0.707065	0.92732	0.791678	3	0.11569	0.431491	-0.730016	0.961397	0.788609
DSGEGDFXAEGGGVR*	MR-Egger intercept	4	-0.020231	0.0510638	-0.120314	0.0798523	0.691965	3	-0.0188731	0.0575914	-0.13175	0.0940039	0.743133	3	-0.0197828	0.0601241	-0.137624	0.0980584	0.742131
pyridoxate	Inverse-variance weighted	4	-0.0598437	0.0144775	-0.0882191	-0.0314684	3.57174e-05	3	-0.0630694	0.0173296	-0.0970348	-0.029104	0.000273275	3	-0.0625102	0.0171739	-0.0961704	-0.0288501	0.0002728
pyridoxate	Weighted median	4	-0.0582959	0.0172115	-0.0920298	-0.024562	0.000706521	3	-0.0632542	0.0209575	-0.10433	-0.0221783	0.00254269	3	-0.0629336	0.0207845	-0.10367	-0.0221968	0.00246247
pyridoxate	MR-Egger	4	-0.033812	0.216844	-0.458818	0.391194	0.87609	3	-0.0537979	0.253505	-0.550659	0.443064	0.831939	3	-0.0571487	0.262571	-0.571778	0.457481	0.827701
pyridoxate	MR-Egger intercept	4	-0.00368504	0.0306278	-0.0637144	0.0563444	0.904232	3	-0.0012759	0.0348047	-0.0694919	0.0669401	0.970757	3	-0.000744375	0.0363763	-0.0720406	0.0705518	0.983674
androsterone sulfate	Inverse-variance weighted	4	0.00112015	0.02491	-0.0477026	0.0499428	0.964133	3	0.00102705	0.0294068	-0.0566092	0.0586633	0.972139	3	0.0010479	0.0291458	-0.0560769	0.0581727	0.971319
androsterone sulfate	Weighted median	4	0.00481458	0.0284248	-0.0508971	0.0605262	0.865498	3	0.0068253	0.0341352	-0.0600784	0.073729	0.84152	3	0.00691814	0.0338314	-0.0593903	0.0732265	0.837972
androsterone sulfate	MR-Egger	4	-0.0859203	0.377552	-0.825909	0.654068	0.819979	3	-0.166412	0.435096	-1.01919	0.686362	0.702112	3	-0.172727	0.450248	-1.0552	0.709742	0.701256
androsterone sulfate	MR-Egger intercept	4	0.0123367	0.0533957	-0.0923169	0.11699	0.817282	3	0.0230532	0.0597675	-0.0940891	0.140195	0.699709	3	0.0241351	0.0624026	-0.0981717	0.146442	0.698931
3-carboxy-4-methyl-5-propyl-2-furanpropanoate (CMPF)	Inverse-variance weighted	4	0.17996	0.0303604	0.120455	0.239465	3.07651e-09	3	0.196691	0.0361777	0.125784	0.267598	5.42464e-08	3	0.194948	0.0358562	0.124671	0.265225	5.42038e-08
3-carboxy-4-methyl-5-propyl-2-furanpropanoate (CMPF)	Weighted median	4	0.176517	0.0374048	0.103205	0.249829	2.36875e-06	3	0.203185	0.0460908	0.112849	0.293521	1.04155e-05	3	0.202167	0.0456636	0.112668	0.291666	9.54197e-06
3-carboxy-4-methyl-5-propyl-2-furanpropanoate (CMPF)	MR-Egger	4	0.278059	0.451207	-0.60629	1.16241	0.537726	3	0.246737	0.524531	-0.781325	1.2748	0.638072	3	0.259169	0.543141	-0.805368	1.32371	0.633243
3-carboxy-4-methyl-5-propyl-2-furanpropanoate (CMPF)	MR-Egger intercept	4	-0.0139106	0.0638367	-0.139028	0.111207	0.8275	3	-0.00690232	0.0721706	-0.148354	0.13455	0.923807	3	-0.008935	0.0754014	-0.156719	0.138849	0.905672
3-(4-hydroxyphenyl)lactate	Inverse-variance weighted	4	-0.0223513	0.00966967	-0.0413035	-0.00339912	0.0208059	3	-0.0216749	0.0116898	-0.0445864	0.00123669	0.0637147	3	-0.0214639	0.0115815	-0.0441633	0.00123542	0.0638404
3-(4-hydroxyphenyl)lactate	Weighted median	4	-0.0223115	0.0111633	-0.0441913	-0.000431748	0.0456474	3	-0.0216183	0.0137352	-0.0485388	0.0053021	0.115501	3	-0.0213972	0.0135964	-0.0480456	0.00525127	0.115548
3-(4-hydroxyphenyl)lactate	MR-Egger	4	-0.0219722	0.149722	-0.315422	0.271478	0.883327	3	-0.0673063	0.178342	-0.416849	0.282237	0.705876	3	-0.069374	0.18483	-0.431634	0.292886	0.707408
3-(4-hydroxyphenyl)lactate	MR-Egger intercept	4	-5.33915e-05	0.0210425	-0.041296	0.0411892	0.997976	3	0.00623608	0.0243201	-0.0414305	0.0539027	0.797629	3	0.00660747	0.0254406	-0.0432552	0.0564701	0.795079
acetylcarnitine	Inverse-variance weighted	4	0.00120568	0.00907393	-0.0165789	0.0189903	0.894294	3	0.000646905	0.0107317	-0.0203868	0.0216806	0.951933	3	0.000645819	0.0106379	-0.020204	0.0214957	0.951591
acetylcarnitine	Weighted median	4	0.00131453	0.0103092	-0.018891	0.0215201	0.898536	3	0.00121504	0.012228	-0.0227514	0.0251815	0.920848	3	0.00121095	0.0121347	-0.0225726	0.0249945	0.920509
acetylcarnitine	MR-Egger	4	-0.0123686	0.133666	-0.274349	0.249612	0.926274	3	-0.0275107	0.154154	-0.329647	0.274626	0.85836	3	-0.0287368	0.159548	-0.341445	0.283971	0.857063
acetylcarnitine	MR-Egger intercept	4	0.00192967	0.0189576	-0.0352265	0.0390859	0.918924	3	0.00389555	0.0212752	-0.0378031	0.0455942	0.854717	3	0.00410005	0.0222137	-0.039438	0.0476381	0.853564
serine	Inverse-variance weighted	4	0.0235352	0.00810381	0.00765204	0.0394184	0.00368174	3	0.0231566	0.00961242	0.00431657	0.0419966	0.0159952	3	0.0229592	0.00952841	0.00428389	0.0416346	0.015972
serine	Weighted median	4	0.022862	0.00939675	0.00444472	0.0412793	0.0149756	3	0.0224301	0.0112192	0.000440861	0.0444193	0.0455803	3	0.0223126	0.0111277	0.000502692	0.0441224	0.0449482
serine	MR-Egger	4	-0.00345709	0.118418	-0.235553	0.228638	0.97671	3	0.0100691	0.136798	-0.258049	0.278188	0.941324	3	0.0109573	0.141631	-0.266633	0.288548	0.938333
serine	MR-Egger intercept	4	0.00383944	0.0168046	-0.0290969	0.0367758	0.819276	3	0.00181245	0.0188979	-0.0352267	0.0388516	0.923594	3	0.00167642	0.019738	-0.0370094	0.0403622	0.932314
trans-4-hydroxyproline	Inverse-variance weighted	4	-0.020935	0.0135789	-0.0475491	0.00567911	0.123139	3	-0.0219388	0.0163348	-0.0539544	0.0100769	0.17925	3	-0.0217671	0.0161858	-0.0534906	0.00995648	0.178681
trans-4-hydroxyproline	Weighted median	4	-0.0170233	0.0156729	-0.0477416	0.0136949	0.277405	3	-0.0164057	0.0195575	-0.0547377	0.0219264	0.401559	3	-0.0163321	0.0193981	-0.0543517	0.0216874	0.399819
trans-4-hydroxyproline	MR-Egger	4	0.0853594	0.20662	-0.319608	0.490327	0.679517	3	0.0628015	0.243616	-0.414676	0.540279	0.79657	3	0.0621379	0.252398	-0.432552	0.556828	0.805535
trans-4-hydroxyproline	MR-Egger intercept	4	-0.0150082	0.0291106	-0.072064	0.0420475	0.606163	3	-0.0116211	0.0333338	-0.0769542	0.053712	0.727368	3	-0.0116103	0.0348535	-0.0799219	0.0567013	0.739046
glutamate	Inverse-variance weighted	4	-0.0152144	0.0127922	-0.0402866	0.00985786	0.234303	3	-0.00964365	0.0159781	-0.0409601	0.0216728	0.546139	3	-0.00955516	0.0158384	-0.0405979	0.0214876	0.546316
glutamate	Weighted median	4	-0.0166654	0.0147174	-0.045511	0.0121803	0.257485	3	-0.0123401	0.0184043	-0.0484118	0.0237317	0.50254	3	-0.0121352	0.0182416	-0.0478881	0.0236176	0.50589
glutamate	MR-Egger	4	0.0180869	0.193696	-0.36155	0.397724	0.925603	3	-0.0659162	0.235321	-0.527137	0.395305	0.779392	3	-0.0697113	0.243359	-0.546686	0.407264	0.77453
glutamate	MR-Egger intercept	4	-0.0047056	0.0273102	-0.0582326	0.0488214	0.8632	3	0.00776562	0.0323994	-0.0557361	0.0712674	0.810575	3	0.00837317	0.0338015	-0.0578766	0.0746229	0.804354
hexanoylcarnitine	Inverse-variance weighted	4	-0.0280261	0.0118936	-0.051337	-0.0047151	0.0184528	3	-0.0282411	0.0140764	-0.0558304	-0.000651925	0.0448267	3	-0.028009	0.0139534	-0.0553571	-0.000660941	0.0447143
hexanoylcarnitine	Weighted median	4	-0.0267056	0.0137861	-0.0537258	0.000314552	0.0527273	3	-0.0313686	0.016244	-0.0632063	0.00046908	0.0534723	3	-0.031012	0.0161148	-0.0625964	0.000572355	0.0542986
hexanoylcarnitine	MR-Egger	4	0.0699601	0.174857	-0.272752	0.412673	0.689083	3	0.0514383	0.201739	-0.343963	0.44684	0.798743	3	0.053582	0.208814	-0.355686	0.46285	0.797486
hexanoylcarnitine	MR-Egger intercept	4	-0.0139314	0.024803	-0.0625444	0.0346816	0.574333	3	-0.0110262	0.0278489	-0.0656091	0.0435568	0.692158	3	-0.0113879	0.0290797	-0.0683832	0.0456073	0.695346
glycine	Inverse-variance weighted	4	0.0153825	0.0097648	-0.00375611	0.0345212	0.115186	3	0.0143715	0.0113401	-0.0078547	0.0365978	0.205042	3	0.0142648	0.011241	-0.00776726	0.0362968	0.204445
glycine	Weighted median	4	0.0140976	0.0113594	-0.00816638	0.0363616	0.214586	3	0.0122392	0.0132149	-0.0136615	0.0381398	0.354359	3	0.0121604	0.013101	-0.0135172	0.0378379	0.353304
glycine	MR-Egger	4	-0.0614071	0.150098	-0.355594	0.23278	0.682457	3	-0.0613522	0.169809	-0.394171	0.271467	0.717874	3	-0.0621837	0.175525	-0.406207	0.281839	0.723135
glycine	MR-Egger intercept	4	0.0109019	0.0212645	-0.0307757	0.0525796	0.608174	3	0.0104337	0.0233452	-0.035322	0.0561895	0.654924	3	0.0106245	0.0243438	-0.0370884	0.0583375	0.662519
alanine	Inverse-variance weighted	4	0.0086044	0.00836892	-0.00779838	0.0250072	0.303885	3	0.00737819	0.00989534	-0.0120163	0.0267727	0.455895	3	0.00733636	0.00980886	-0.0118886	0.0265614	0.454501
alanine	Weighted median	4	0.011585	0.00988047	-0.00778034	0.0309504	0.240989	3	0.0100161	0.0118629	-0.0132348	0.0332669	0.398491	3	0.00994592	0.0117774	-0.0131373	0.0330292	0.398394
alanine	MR-Egger	4	-0.123346	0.123368	-0.365143	0.118451	0.317396	3	-0.134612	0.142258	-0.413432	0.144208	0.344019	3	-0.140716	0.147231	-0.429283	0.14785	0.339196
alanine	MR-Egger intercept	4	0.0187566	0.0174962	-0.0155353	0.0530486	0.283703	3	0.0196423	0.0196317	-0.0188351	0.0581198	0.317048	3	0.0206575	0.0204971	-0.0195162	0.0608311	0.313539
glycochenodeoxycholate	Inverse-variance weighted	4	-0.0865802	0.0280576	-0.141572	-0.0315883	0.00203006	3	-0.0884347	0.0333932	-0.153884	-0.0229853	0.00809003	3	-0.0876969	0.0330949	-0.152562	-0.0228321	0.00805246
glycochenodeoxycholate	Weighted median	4	-0.0866927	0.0326741	-0.150733	-0.0226525	0.00797208	3	-0.085832	0.0397041	-0.163651	-0.00801339	0.0306342	3	-0.0852193	0.0393791	-0.162401	-0.00803764	0.0304587
glycochenodeoxycholate	MR-Egger	4	0.0095082	0.420044	-0.813762	0.832778	0.98194	3	0.128138	0.486843	-0.826057	1.08233	0.792395	3	0.130633	0.504151	-0.857484	1.11875	0.795547
glycochenodeoxycholate	MR-Egger intercept	4	-0.013621	0.0594104	-0.130063	0.102821	0.818659	3	-0.0298357	0.0669111	-0.160979	0.101308	0.655669	3	-0.0303429	0.0699143	-0.167372	0.106687	0.664288
2-aminobutyrate	Inverse-variance weighted	4	-0.000244771	0.00836892	-0.0166476	0.016158	0.976667	3	-1.60001e-05	0.00989534	-0.0194105	0.0193785	0.99871	3	-1.57077e-05	0.00980886	-0.0192407	0.0192093	0.998722
2-aminobutyrate	Weighted median	4	-0.00013793	0.00950304	-0.0187635	0.0184877	0.98842	3	0.000525777	0.0112676	-0.0215583	0.0226099	0.962782	3	0.000530637	0.0111806	-0.021383	0.0224442	0.962146
2-aminobutyrate	MR-Egger	4	0.0282283	0.123368	-0.213569	0.270025	0.819014	3	0.00528784	0.142258	-0.273532	0.284108	0.970349	3	0.0057502	0.147231	-0.282817	0.294317	0.968846
2-aminobutyrate	MR-Egger intercept	4	-0.00404741	0.0174962	-0.0383394	0.0302445	0.817058	3	-0.000733713	0.0196317	-0.0392111	0.0377437	0.970187	3	-0.000804504	0.0204971	-0.0409782	0.0393691	0.968691
scyllo-inositol	Inverse-variance weighted	4	-0.00483833	0.0154298	-0.0350802	0.0254035	0.753847	3	-0.0034212	0.0184387	-0.0395604	0.032718	0.852802	3	-0.00337931	0.0182712	-0.0391903	0.0324317	0.853266
scyllo-inositol	Weighted median	4	-0.00948057	0.0179666	-0.0446944	0.0257332	0.597722	3	-0.00992109	0.0227075	-0.0544269	0.0345848	0.662178	3	-0.00968505	0.0225156	-0.0538148	0.0344447	0.667088
scyllo-inositol	MR-Egger	4	-0.148344	0.234692	-0.608332	0.311645	0.527336	3	-0.15761	0.273308	-0.693284	0.378063	0.564158	3	-0.167978	0.283135	-0.722913	0.386957	0.552995
scyllo-inositol	MR-Egger intercept	4	0.0202977	0.0331235	-0.0446232	0.0852186	0.540016	3	0.0211673	0.0374347	-0.0522033	0.094538	0.57177	3	0.0227991	0.0391362	-0.0539065	0.0995047	0.560192
dodecanedioate	Inverse-variance weighted	4	0.0205643	0.0137346	-0.00635491	0.0474836	0.134323	3	0.015007	0.0164575	-0.017249	0.0472631	0.361839	3	0.0148681	0.0163064	-0.0170919	0.0468281	0.361877
dodecanedioate	Weighted median	4	0.0215514	0.0158546	-0.00952311	0.0526259	0.174048	3	0.0180482	0.0194049	-0.0199847	0.0560812	0.352326	3	0.0177733	0.0192099	-0.0198774	0.055424	0.354854
dodecanedioate	MR-Egger	4	0.0467206	0.211494	-0.3678	0.461241	0.825164	3	0.0614888	0.247613	-0.423823	0.546801	0.803882	3	0.0656542	0.256571	-0.437216	0.568524	0.798035
dodecanedioate	MR-Egger intercept	4	-0.00369339	0.0298009	-0.0621021	0.0547153	0.901366	3	-0.00636543	0.0338343	-0.0726794	0.0599485	0.85077	3	-0.00701798	0.0353831	-0.0763677	0.0623317	0.842777
gamma-glutamylvaline	Inverse-variance weighted	4	-0.0172795	0.00845615	-0.0338532	-0.000705704	0.041011	3	-0.0163226	0.0100304	-0.0359817	0.00333658	0.10367	3	-0.0161873	0.00994269	-0.0356746	0.00330004	0.103513
gamma-glutamylvaline	Weighted median	4	-0.0156917	0.00974109	-0.0347839	0.0034005	0.107207	3	-0.0149549	0.0114964	-0.0374875	0.00757768	0.193316	3	-0.0148349	0.0114061	-0.0371904	0.00752058	0.19339
gamma-glutamylvaline	MR-Egger	4	0.0257237	0.123567	-0.216463	0.26791	0.835091	3	0.0090736	0.142745	-0.270702	0.288849	0.949317	3	0.00892261	0.147788	-0.280737	0.298583	0.951858
gamma-glutamylvaline	MR-Egger intercept	4	-0.00611686	0.0175352	-0.0404852	0.0282515	0.727214	3	-0.00351704	0.0197195	-0.0421666	0.0351325	0.858446	3	-0.00350733	0.0205962	-0.0438751	0.0368605	0.864782
indolepropionate	Inverse-variance weighted	4	0.122372	0.0139334	0.0950626	0.149681	1.59735e-18	3	0.127433	0.0175926	0.0929521	0.161914	4.37061e-13	3	0.126356	0.0174398	0.0921745	0.160537	4.31607e-13
indolepropionate	Weighted median	4	0.120937	0.0187427	0.0842023	0.157672	1.10011e-10	3	0.126684	0.0238294	0.0799796	0.173389	1.05898e-07	3	0.125707	0.0235594	0.0795311	0.171882	9.51565e-08
indolepropionate	MR-Egger	4	0.00245316	0.211785	-0.412637	0.417543	0.990758	3	-0.00942081	0.259951	-0.518915	0.500073	0.97109	3	-0.00865456	0.268719	-0.535334	0.518025	0.974307
indolepropionate	MR-Egger intercept	4	0.0169347	0.0298431	-0.0415568	0.0754262	0.570403	3	0.0188944	0.0358071	-0.0512863	0.0890751	0.597728	3	0.0187997	0.0373393	-0.0543839	0.0919833	0.614624
butyrylcarnitine	Inverse-variance weighted	4	-0.0298928	0.0152693	-0.0598201	3.44374e-05	0.0502642	3	-0.0302467	0.0183062	-0.0661261	0.00563279	0.0984806	3	-0.0299488	0.0181409	-0.0655043	0.0056066	0.098758
butyrylcarnitine	Weighted median	4	-0.0306253	0.0179431	-0.0657932	0.00454247	0.0878585	3	-0.0305838	0.0225967	-0.0748725	0.0137049	0.175907	3	-0.0301091	0.0224399	-0.0740905	0.0138722	0.179671
butyrylcarnitine	MR-Egger	4	-0.18217	0.229809	-0.632587	0.268247	0.427951	3	-0.229152	0.269341	-0.757051	0.298747	0.394887	3	-0.240934	0.278996	-0.787757	0.305889	0.387822
butyrylcarnitine	MR-Egger intercept	4	0.0215386	0.0324331	-0.0420291	0.0851063	0.506631	3	0.0273424	0.0369392	-0.0450571	0.099742	0.459178	3	0.0292615	0.0386121	-0.0464168	0.10494	0.448551
myristoleate (14:1n5)	Inverse-variance weighted	4	-0.0254131	0.0139447	-0.0527442	0.00191788	0.06839	3	-0.028844	0.0166234	-0.0614253	0.00373732	0.0827158	3	-0.0285412	0.016475	-0.0608315	0.0037492	0.0832033
myristoleate (14:1n5)	Weighted median	4	-0.0226499	0.0163099	-0.0546167	0.00931691	0.164918	3	-0.0298811	0.0201636	-0.069401	0.00963881	0.138358	3	-0.0295145	0.0200257	-0.0687642	0.00973522	0.140528
myristoleate (14:1n5)	MR-Egger	4	-0.173763	0.208846	-0.583095	0.235568	0.405401	3	-0.221743	0.243212	-0.698429	0.254943	0.361912	3	-0.228042	0.251832	-0.721624	0.265539	0.365182
myristoleate (14:1n5)	MR-Egger intercept	4	0.0210144	0.029518	-0.0368397	0.0788686	0.476515	3	0.0265661	0.0334169	-0.0389299	0.0920622	0.426619	3	0.0277176	0.0349131	-0.0407109	0.096146	0.427253
dehydroisoandrosterone sulfate (DHEA-S)	Inverse-variance weighted	4	0.0247805	0.0180047	-0.0105081	0.0600691	0.168719	3	0.0230484	0.0221147	-0.0202956	0.0663925	0.297309	3	0.0229127	0.0219215	-0.0200526	0.065878	0.295922
dehydroisoandrosterone sulfate (DHEA-S)	Weighted median	4	0.026682	0.0208603	-0.0142034	0.0675673	0.200868	3	0.0142387	0.026686	-0.0380649	0.0665422	0.593644	3	0.0141866	0.0264866	-0.0377263	0.0660994	0.592226
dehydroisoandrosterone sulfate (DHEA-S)	MR-Egger	4	-0.124639	0.270899	-0.655592	0.406315	0.64545	3	-0.225165	0.324054	-0.8603	0.40997	0.487158	3	-0.228708	0.335175	-0.885639	0.428222	0.495014
dehydroisoandrosterone sulfate (DHEA-S)	MR-Egger intercept	4	0.0211459	0.0382531	-0.0538288	0.0961205	0.580408	3	0.0342703	0.0446372	-0.0532171	0.121758	0.442635	3	0.0350404	0.0465761	-0.056247	0.126328	0.451855
propionylcarnitine	Inverse-variance weighted	4	-0.00981799	0.00907393	-0.0276026	0.00796658	0.279252	3	-0.00921444	0.0107317	-0.0302481	0.0118192	0.390549	3	-0.00913081	0.0106379	-0.0299807	0.011719	0.39071
propionylcarnitine	Weighted median	4	-0.0115341	0.0103653	-0.0318498	0.00878154	0.265812	3	-0.0110755	0.0123236	-0.0352293	0.0130783	0.368802	3	-0.0109288	0.01223	-0.034899	0.0130415	0.371532
propionylcarnitine	MR-Egger	4	-0.023936	0.133666	-0.285916	0.238044	0.85788	3	-0.046358	0.154154	-0.348495	0.255779	0.763624	3	-0.0489971	0.159548	-0.361705	0.263711	0.758767
propionylcarnitine	MR-Egger intercept	4	0.00200696	0.0189576	-0.0351493	0.0391632	0.915689	3	0.00513875	0.0212752	-0.0365599	0.0468374	0.809139	3	0.00556294	0.0222137	-0.0379751	0.049101	0.802256
caproate (6:0)	Inverse-variance weighted	4	0.0398124	0.00680698	0.0264709	0.0531538	4.95261e-09	3	0.0383567	0.00908952	0.0205415	0.0561718	2.44435e-05	3	0.0380323	0.00901088	0.0203712	0.0556933	2.43542e-05
caproate (6:0)	Weighted median	4	0.0374478	0.00865098	0.0204922	0.0544034	1.49967e-05	3	0.0376956	0.0109432	0.0162473	0.059144	0.000571804	3	0.0374712	0.0108318	0.0162413	0.058701	0.000541422
caproate (6:0)	MR-Egger	4	-0.0326875	0.108124	-0.244606	0.179231	0.762411	3	0.0358295	0.140521	-0.239587	0.311246	0.798742	3	0.0388333	0.145048	-0.245455	0.323121	0.788909
caproate (6:0)	MR-Egger intercept	4	0.0101775	0.0151482	-0.0195125	0.0398674	0.501673	3	0.000347655	0.0192907	-0.0374614	0.0381567	0.985621	3	-0.000111141	0.0200858	-0.0394787	0.0392564	0.995585
caprylate (8:0)	Inverse-variance weighted	4	0.037013	0.00845615	0.0204392	0.0535867	1.20299e-05	3	0.0374171	0.0100304	0.017758	0.0570762	0.000191187	3	0.0370869	0.00994269	0.0175996	0.0565743	0.000191426
caprylate (8:0)	Weighted median	4	0.0386944	0.0100884	0.0189215	0.0584672	0.000125286	3	0.0390451	0.0120571	0.0154136	0.0626767	0.00120228	3	0.0385591	0.0119551	0.0151276	0.0619906	0.00125826
caprylate (8:0)	MR-Egger	4	0.0597418	0.123567	-0.182445	0.301928	0.628757	3	0.0708535	0.142745	-0.208922	0.350629	0.619638	3	0.0742496	0.147788	-0.21541	0.36391	0.615383
caprylate (8:0)	MR-Egger intercept	4	-0.003233	0.0175352	-0.0376013	0.0311353	0.853722	3	-0.00463051	0.0197195	-0.0432801	0.034019	0.81435	3	-0.00519085	0.0205962	-0.0455587	0.0351769	0.801018
10-undecenoate (11:1n1)	Inverse-variance weighted	4	-0.0103325	0.0114338	-0.0327424	0.0120774	0.366167	3	-0.0124431	0.0134914	-0.0388858	0.0139995	0.356371	3	-0.0122974	0.0133746	-0.038511	0.0139163	0.357856
10-undecenoate (11:1n1)	Weighted median	4	-0.0082488	0.0133683	-0.0344501	0.0179525	0.537206	3	-0.0142428	0.0158798	-0.0453666	0.016881	0.369766	3	-0.0140501	0.0157666	-0.044952	0.0168518	0.372859
10-undecenoate (11:1n1)	MR-Egger	4	-0.12182	0.166898	-0.448934	0.205293	0.465444	3	-0.167549	0.191929	-0.543723	0.208625	0.382678	3	-0.172116	0.198634	-0.561432	0.217199	0.386216
10-undecenoate (11:1n1)	MR-Egger intercept	4	0.0158766	0.0237114	-0.030597	0.0623501	0.503129	3	0.021508	0.0265484	-0.0305258	0.0735419	0.417857	3	0.0223506	0.0277158	-0.0319714	0.0766725	0.42
docosapentaenoate (n3 DPA; 22:5n3)	Inverse-variance weighted	4	0.0459524	0.0140936	0.0183295	0.0735753	0.00111208	3	0.0475099	0.0167173	0.0147447	0.0802751	0.00448362	3	0.0471372	0.0165712	0.0146583	0.079616	0.00444767
docosapentaenoate (n3 DPA; 22:5n3)	Weighted median	4	0.0489846	0.0166061	0.0164372	0.081532	0.00317989	3	0.0458808	0.0201815	0.00632584	0.0854358	0.0230014	3	0.0455969	0.0200154	0.00636738	0.0848263	0.0227213
docosapentaenoate (n3 DPA; 22:5n3)	MR-Egger	4	-0.058	0.205945	-0.461644	0.345644	0.778228	3	-0.127471	0.237909	-0.593764	0.338822	0.592099	3	-0.130629	0.246314	-0.613395	0.352138	0.59588
docosapentaenoate (n3 DPA; 22:5n3)	MR-Egger intercept	4	0.0147864	0.0292253	-0.0424942	0.072067	0.612895	3	0.0242326	0.0328659	-0.0401833	0.0886485	0.460929	3	0.0248302	0.034327	-0.0424495	0.0921099	0.469469
X-11204	Inverse-variance weighted	4	0.0282933	0.00634211	0.015863	0.0407236	8.15094e-06	3	0.0300583	0.00752277	0.015314	0.0448027	6.45181e-05	3	0.0298109	0.00745702	0.0151954	0.0444264	6.39621e-05
X-11204	Weighted median	4	0.0283259	0.00766561	0.0133016	0.0433502	0.000219722	3	0.0325745	0.00928024	0.0143856	0.0507635	0.000447949	3	0.0322087	0.00919944	0.0141781	0.0502393	0.000463241
X-11204	MR-Egger	4	-0.0382839	0.0926751	-0.219924	0.143356	0.679535	3	-0.0545694	0.107059	-0.264401	0.155262	0.610252	3	-0.0570048	0.110841	-0.27425	0.16024	0.607048
X-11204	MR-Egger intercept	4	0.00947008	0.0131514	-0.0163062	0.0352463	0.471474	3	0.0117198	0.0147896	-0.0172673	0.040707	0.428106	3	0.0121263	0.0154471	-0.0181495	0.0424022	0.432441
X-02269	Inverse-variance weighted	4	0.115066	0.026034	0.0640398	0.166091	9.8785e-06	3	0.124086	0.0310065	0.063314	0.184857	6.28289e-05	3	0.12298	0.0307312	0.0627477	0.183212	6.28651e-05
X-02269	Weighted median	4	0.116214	0.030847	0.0557547	0.176673	0.000164941	3	0.124196	0.0375352	0.0506284	0.197764	0.000937007	3	0.122596	0.037215	0.0496555	0.195536	0.000986841
X-02269	MR-Egger	4	0.148149	0.386682	-0.609734	0.906032	0.701624	3	0.151315	0.449266	-0.729231	1.03186	0.736264	3	0.157112	0.465191	-0.754645	1.06887	0.735562
X-02269	MR-Egger intercept	4	-0.00469206	0.0547164	-0.111934	0.10255	0.931663	3	-0.00375625	0.0618273	-0.124936	0.117423	0.951555	3	-0.00474968	0.0645923	-0.131348	0.121849	0.941382
phenol sulfate	Inverse-variance weighted	4	0.0462358	0.0186135	0.00975399	0.0827177	0.0129919	3	0.0528445	0.0222192	0.00929552	0.0963934	0.0173918	3	0.0523665	0.0220187	0.00921066	0.0955222	0.0173938
phenol sulfate	Weighted median	4	0.0445644	0.021336	0.00274652	0.0863822	0.0367355	3	0.0550511	0.0264064	0.00329545	0.106807	0.037091	3	0.0543221	0.0262002	0.00297063	0.105674	0.0381401
phenol sulfate	MR-Egger	4	0.100855	0.281098	-0.450087	0.651797	0.719753	3	0.0790959	0.326775	-0.56137	0.719562	0.808741	3	0.0829987	0.338486	-0.580423	0.74642	0.806297
phenol sulfate	MR-Egger intercept	4	-0.00773221	0.0397066	-0.0855558	0.0700913	0.845602	3	-0.00360894	0.0448195	-0.0914535	0.0842357	0.935822	3	-0.00424871	0.0468488	-0.0960707	0.0875733	0.927739
X-06126	Inverse-variance weighted	4	-0.0239984	0.021423	-0.0659867	0.01799	0.262623	3	-0.0296642	0.0251443	-0.0789462	0.0196178	0.238098	3	-0.029416	0.0249246	-0.0782673	0.0194354	0.237921
X-06126	Weighted median	4	-0.0242344	0.0244339	-0.0721239	0.0236552	0.321278	3	-0.0282703	0.0288147	-0.0847462	0.0282055	0.32654	3	-0.0280481	0.02856	-0.0840245	0.0279284	0.326062
X-06126	MR-Egger	4	-0.0376178	0.322635	-0.669971	0.594735	0.907181	3	0.0134057	0.37056	-0.712879	0.739691	0.971141	3	0.0131622	0.38321	-0.737916	0.764241	0.9726
X-06126	MR-Egger intercept	4	0.00193302	0.0456908	-0.0876193	0.0914853	0.966254	3	-0.00594328	0.0510164	-0.105934	0.094047	0.907258	3	-0.00592612	0.053223	-0.110241	0.0983891	0.911343
X-07765	Inverse-variance weighted	4	-0.0540603	0.032998	-0.118735	0.0106145	0.101361	3	-0.0619144	0.0399815	-0.140277	0.016448	0.121484	3	-0.0614593	0.0396321	-0.139137	0.0162183	0.120963
X-07765	Weighted median	4	-0.0487682	0.0378161	-0.122886	0.02535	0.197185	3	-0.0481684	0.046814	-0.139922	0.0435853	0.303512	3	-0.0478311	0.0464374	-0.138847	0.0431847	0.303005
X-07765	MR-Egger	4	0.173912	0.492151	-0.790687	1.13851	0.723811	3	0.246894	0.579389	-0.888688	1.38248	0.670014	3	0.249796	0.599484	-0.925171	1.42476	0.676909
X-07765	MR-Egger intercept	4	-0.032332	0.069642	-0.168828	0.104164	0.642461	3	-0.042684	0.0798932	-0.199272	0.113904	0.593159	3	-0.0433929	0.0833929	-0.20684	0.120054	0.602824
X-11247	Inverse-variance weighted	4	0.062193	0.0277953	0.00771511	0.116671	0.0252516	3	0.0536712	0.0338512	-0.0126759	0.120018	0.112852	3	0.0532816	0.0335553	-0.0124857	0.119049	0.112315
X-11247	Weighted median	4	0.065247	0.0325894	0.00137291	0.129121	0.0452749	3	0.0548953	0.0400876	-0.0236749	0.133466	0.170879	3	0.054664	0.0397759	-0.0232953	0.132623	0.169349
X-11247	MR-Egger	4	-0.308898	0.415066	-1.12241	0.504616	0.456746	3	-0.307282	0.49067	-1.26898	0.654413	0.531151	3	-0.316131	0.507683	-1.31117	0.67891	0.533486
X-11247	MR-Egger intercept	4	0.0526118	0.0587142	-0.062466	0.16769	0.370218	3	0.0498903	0.0676579	-0.0827167	0.182497	0.460885	3	0.0514995	0.070621	-0.0869152	0.189914	0.465856
X-11261	Inverse-variance weighted	4	0.00865835	0.0174255	-0.025495	0.0428117	0.619275	3	0.0117973	0.0203676	-0.0281223	0.051717	0.56244	3	0.0116949	0.0201905	-0.0278778	0.0512676	0.562436
X-11261	Weighted median	4	0.00305816	0.0204137	-0.036952	0.0430683	0.880915	3	0.0041045	0.0239356	-0.0428084	0.0510173	0.863846	3	0.0039675	0.0237212	-0.0425251	0.0504601	0.867169
X-11261	MR-Egger	4	-0.0213039	0.263086	-0.536942	0.494334	0.93546	3	-0.0998405	0.301062	-0.68991	0.490229	0.74017	3	-0.108143	0.311227	-0.718136	0.50185	0.728236
X-11261	MR-Egger intercept	4	0.00425439	0.0372739	-0.0688012	0.0773099	0.909128	3	0.0154109	0.0414643	-0.0658577	0.0966794	0.710142	3	0.0166848	0.0432402	-0.0680645	0.101434	0.699599
bilirubin (E	Inverse-variance weighted	4	-0.0563428	0.0225063	-0.100454	-0.0122313	0.0122998	3	-0.0594501	0.0268207	-0.112018	-0.00688252	0.0266521	3	-0.0589071	0.026582	-0.111007	-0.00680734	0.0266879
bilirubin (E	Weighted median	4	-0.0594832	0.0260565	-0.110553	-0.00841332	0.0224392	3	-0.0598505	0.0315	-0.121589	0.00188836	0.057431	3	-0.0594839	0.0312577	-0.120748	0.00178005	0.0570384
bilirubin (E	MR-Egger	4	-0.0120387	0.335179	-0.668978	0.6449	0.971348	3	-0.0799236	0.389812	-0.843942	0.684095	0.837548	3	-0.0805578	0.403637	-0.871672	0.710557	0.841809
bilirubin (E	MR-Egger intercept	4	-0.00628062	0.0474083	-0.0991993	0.086638	0.894605	3	0.00282259	0.0536144	-0.10226	0.107905	0.958014	3	0.00301108	0.0560144	-0.106775	0.112797	0.95713
X-02249	Inverse-variance weighted	4	0.00584567	0.0134052	-0.020428	0.0321193	0.662781	3	0.0122732	0.0160535	-0.019191	0.0437374	0.444557	3	0.0121684	0.015908	-0.0190107	0.0433476	0.444316
X-02249	Weighted median	4	0.00505285	0.0152085	-0.0247552	0.0348609	0.739708	3	0.0139601	0.0187151	-0.0227208	0.050641	0.455713	3	0.0137775	0.0185565	-0.0225926	0.0501477	0.457807
X-02249	MR-Egger	4	0.0211718	0.203873	-0.378411	0.420755	0.91729	3	-0.0254222	0.239267	-0.494377	0.443532	0.915384	3	-0.0265302	0.24781	-0.512228	0.459168	0.914742
X-02249	MR-Egger intercept	4	-0.00216555	0.0287444	-0.0585035	0.0541724	0.939946	3	0.00517397	0.0327671	-0.0590484	0.0693964	0.874535	3	0.00535921	0.0342473	-0.0617643	0.0724827	0.87565
heme*	Inverse-variance weighted	4	-0.0927187	0.0174744	-0.126968	-0.0584696	1.12067e-07	3	-0.0947622	0.0208123	-0.135553	-0.0539709	5.2839e-06	3	-0.0939692	0.0206272	-0.134398	-0.0535406	5.22366e-06
heme*	Weighted median	4	-0.0940908	0.021454	-0.13614	-0.0520418	1.1561e-05	3	-0.0911269	0.0260826	-0.142248	-0.0400059	0.00047624	3	-0.0904526	0.0258481	-0.141114	-0.0397913	0.000466316
heme*	MR-Egger	4	0.0501821	0.260355	-0.460104	0.560468	0.847159	3	0.106706	0.302655	-0.486488	0.6999	0.724414	3	0.108284	0.313374	-0.505919	0.722486	0.729687
heme*	MR-Egger intercept	4	-0.0202587	0.0368266	-0.0924374	0.0519201	0.582244	3	-0.0277764	0.0416282	-0.109366	0.0538135	0.504614	3	-0.0281292	0.0434893	-0.113367	0.0571083	0.517757
X-11299	Inverse-variance weighted	4	0.0724717	0.0341443	0.00555011	0.139393	0.0337947	3	0.0684027	0.0415628	-0.0130589	0.149864	0.0998116	3	0.0678687	0.0411945	-0.012871	0.148608	0.0994512
X-11299	Weighted median	4	0.0795256	0.0394682	0.00216934	0.156882	0.0439122	3	0.0753297	0.0493789	-0.0214512	0.172111	0.127124	3	0.0749748	0.0490029	-0.021069	0.171019	0.126014
X-11299	MR-Egger	4	-0.246962	0.515914	-1.25813	0.76421	0.63216	3	-0.29345	0.610986	-1.49096	0.904061	0.631022	3	-0.303243	0.632325	-1.54258	0.936091	0.631534
X-11299	MR-Egger intercept	4	0.0451992	0.0728405	-0.0975657	0.187964	0.534914	3	0.0498591	0.0839917	-0.114762	0.21448	0.552767	3	0.0515822	0.0877024	-0.120311	0.223476	0.556432
X-11315	Inverse-variance weighted	4	0.00109109	0.0119795	-0.0223884	0.0245706	0.927429	3	0.00196772	0.0142097	-0.0258827	0.0298182	0.889863	3	0.00195725	0.0140855	-0.0256498	0.0295643	0.889485
X-11315	Weighted median	4	0.000225293	0.0135992	-0.0264286	0.0268792	0.986782	3	0.00243246	0.0161961	-0.0293113	0.0341762	0.880616	3	0.00241754	0.0160728	-0.0290846	0.0339197	0.88044
X-11315	MR-Egger	4	-0.0297242	0.175053	-0.372822	0.313373	0.865167	3	-0.0402124	0.202223	-0.436562	0.356137	0.842378	3	-0.0420948	0.209367	-0.452446	0.368257	0.840654
X-11315	MR-Egger intercept	4	0.00438323	0.0248415	-0.0443053	0.0530717	0.859942	3	0.0058414	0.027936	-0.0489121	0.0605949	0.834371	3	0.00615316	0.0291779	-0.0510346	0.0633409	0.832978
X-11317	Inverse-variance weighted	4	0.00648875	0.00680698	-0.0068527	0.0198302	0.340464	3	0.00560256	0.00828231	-0.0106305	0.0218356	0.498756	3	0.00557583	0.0082041	-0.0105039	0.0216556	0.496733
X-11317	Weighted median	4	0.00926558	0.00794012	-0.00629678	0.0248279	0.243238	3	0.0101433	0.0100295	-0.00951417	0.0298008	0.31185	3	0.0100697	0.00991726	-0.00936781	0.0295071	0.309931
X-11317	MR-Egger	4	-0.106565	0.108124	-0.318484	0.105353	0.324336	3	-0.145729	0.13095	-0.402387	0.110929	0.265769	3	-0.151305	0.135784	-0.417438	0.114827	0.265148
X-11317	MR-Egger intercept	4	0.0158704	0.0151482	-0.0138195	0.0455604	0.294787	3	0.0205868	0.0177785	-0.0142584	0.0554321	0.24688	3	0.0215414	0.0186105	-0.0149346	0.0580174	0.247075
1-linoleoylglycerophosphoethanolamine*	Inverse-variance weighted	4	-0.0163535	0.0127922	-0.0414258	0.00871873	0.201109	3	-0.017382	0.0153656	-0.047498	0.012734	0.25796	3	-0.0172182	0.015226	-0.0470607	0.0126243	0.258122
1-linoleoylglycerophosphoethanolamine*	Weighted median	4	-0.0169801	0.0146162	-0.0456273	0.0116671	0.245343	3	-0.0177942	0.0180818	-0.0532338	0.0176454	0.325068	3	-0.0175364	0.0179296	-0.0526779	0.017605	0.32804
1-linoleoylglycerophosphoethanolamine*	MR-Egger	4	-0.0956412	0.193696	-0.475278	0.283996	0.621469	3	-0.0692785	0.227757	-0.515673	0.377116	0.760993	3	-0.0728338	0.235946	-0.53528	0.389612	0.757559
1-linoleoylglycerophosphoethanolamine*	MR-Egger intercept	4	0.0112036	0.0273102	-0.0423233	0.0647306	0.681632	3	0.00712444	0.0311956	-0.0540178	0.0682666	0.819351	3	0.00770349	0.0326135	-0.0562178	0.0716248	0.813273
X-11327	Inverse-variance weighted	4	0.041438	0.00741461	0.0269056	0.0559704	2.28782e-08	3	0.0447743	0.00920888	0.0267252	0.0628233	1.16161e-06	3	0.0444014	0.00912842	0.0265101	0.0622928	1.14985e-06
X-11327	Weighted median	4	0.0429152	0.00943584	0.0244213	0.0614092	5.41302e-06	3	0.0483828	0.0115706	0.0257048	0.0710608	2.89555e-05	3	0.0497563	0.0114468	0.0273209	0.0721917	1.38183e-05
X-11327	MR-Egger	4	-0.0362626	0.112239	-0.256246	0.183721	0.746631	3	-0.0831666	0.144664	-0.366704	0.200371	0.565364	3	-0.0864169	0.149358	-0.379152	0.206319	0.562865
X-11327	MR-Egger intercept	4	0.010848	0.0156358	-0.0197975	0.0414935	0.487811	3	0.0175583	0.0198131	-0.0212748	0.0563914	0.375513	3	0.0181086	0.0206362	-0.0223377	0.0585548	0.380207
X-11334	Inverse-variance weighted	4	0.0247062	0.0113598	0.00244139	0.046971	0.0296392	3	0.0233895	0.0131664	-0.00241615	0.0491951	0.075658	3	0.0231712	0.0130522	-0.00241062	0.048753	0.0758528
X-11334	Weighted median	4	0.0255182	0.0131932	-0.000339893	0.0513764	0.0530884	3	0.0265833	0.0150737	-0.00296052	0.0561271	0.077806	3	0.0264167	0.0149422	-0.00286939	0.0557028	0.0770725
X-11334	MR-Egger	4	0.0423789	0.175368	-0.301337	0.386094	0.809046	3	0.0725001	0.199641	-0.31879	0.46379	0.716492	3	0.0731918	0.206207	-0.330967	0.47735	0.722632
X-11334	MR-Egger intercept	4	-0.00250624	0.0248174	-0.0511474	0.0461349	0.919561	3	-0.00676524	0.0274418	-0.0605501	0.0470196	0.805271	3	-0.0069497	0.0285923	-0.0629895	0.0490901	0.807957
3-dehydrocarnitine*	Inverse-variance weighted	4	-0.0314693	0.00880849	-0.0487336	-0.014205	0.000353445	3	-0.0319296	0.0104483	-0.0524078	-0.0114513	0.0022434	3	-0.0316455	0.010357	-0.0519447	-0.0113462	0.00224704
3-dehydrocarnitine*	Weighted median	4	-0.0334254	0.0104386	-0.0538847	-0.012966	0.00136439	3	-0.0338115	0.0123977	-0.0581106	-0.00951242	0.00638674	3	-0.0333854	0.0122998	-0.0574927	-0.00927819	0.00664163
3-dehydrocarnitine*	MR-Egger	4	-0.0769393	0.128715	-0.329217	0.175338	0.550009	3	-0.0806737	0.148693	-0.372107	0.210759	0.587438	3	-0.0846983	0.153946	-0.386427	0.217031	0.582195
3-dehydrocarnitine*	MR-Egger intercept	4	0.00646774	0.0182658	-0.0293326	0.0422681	0.723272	3	0.00675044	0.0205412	-0.0335095	0.0470104	0.742436	3	0.00741037	0.0214544	-0.0346394	0.0494602	0.729792
pyroglutamine*	Inverse-variance weighted	4	-0.0189382	0.0141666	-0.0467042	0.00882779	0.181281	3	-0.0262537	0.0170695	-0.0597092	0.00720184	0.124036	3	-0.026068	0.0169203	-0.0592312	0.00709517	0.123406
pyroglutamine*	Weighted median	4	-0.0196629	0.0161301	-0.0512773	0.0119516	0.222838	3	-0.025416	0.0202731	-0.0651505	0.0143186	0.209959	3	-0.0253073	0.0200959	-0.0646946	0.0140801	0.207914
pyroglutamine*	MR-Egger	4	0.0300101	0.207507	-0.376697	0.436717	0.885009	3	0.172276	0.252615	-0.32284	0.667392	0.495258	3	0.17658	0.261206	-0.335375	0.688534	0.49903
pyroglutamine*	MR-Egger intercept	4	-0.00690137	0.0291888	-0.0641104	0.0503077	0.813092	3	-0.0273845	0.0347652	-0.0955231	0.0407541	0.430873	3	-0.0281937	0.0362644	-0.0992707	0.0428833	0.436894
C-glycosyltryptophan*	Inverse-variance weighted	4	-0.00626593	0.00590075	-0.0178312	0.00529932	0.288286	3	-0.00668632	0.00696732	-0.020342	0.00696938	0.337222	3	-0.00663283	0.00690643	-0.0201692	0.00690352	0.336861
C-glycosyltryptophan*	Weighted median	4	-0.00565914	0.00671493	-0.0188202	0.00750187	0.399357	3	-0.00709396	0.00794536	-0.0226666	0.00847866	0.371941	3	-0.00705326	0.00788321	-0.0225041	0.00839755	0.370937
C-glycosyltryptophan*	MR-Egger	4	0.0195466	0.0873244	-0.151606	0.190699	0.822882	3	0.0174313	0.100618	-0.179775	0.214638	0.862461	3	0.0180084	0.104119	-0.186061	0.222078	0.862683
C-glycosyltryptophan*	MR-Egger intercept	4	-0.00366817	0.0123811	-0.0279347	0.0205984	0.767023	3	-0.00333476	0.0138791	-0.0305372	0.0238677	0.810119	3	-0.00343653	0.0144887	-0.0318338	0.0249608	0.812512
X-11374	Inverse-variance weighted	4	-0.0470324	0.0239888	-0.0940495	-1.52244e-05	0.0499259	3	-0.0413089	0.0284693	-0.0971077	0.0144899	0.14678	3	-0.0409426	0.0282183	-0.0962495	0.0143643	0.146801
X-11374	Weighted median	4	-0.0479251	0.0274764	-0.101778	0.00592761	0.0811191	3	-0.0355315	0.0330553	-0.100319	0.0292556	0.282414	3	-0.0352506	0.0328086	-0.0995543	0.0290532	0.28263
X-11374	MR-Egger	4	0.0100448	0.355268	-0.686268	0.706358	0.977444	3	0.0114703	0.411262	-0.794589	0.817529	0.97775	3	0.0147629	0.425737	-0.819667	0.849193	0.972338
X-11374	MR-Egger intercept	4	-0.00810296	0.0503205	-0.106729	0.0905235	0.872072	3	-0.00728956	0.056665	-0.118351	0.103772	0.89764	3	-0.0077606	0.0591811	-0.123753	0.108232	0.89567
X-11381	Inverse-variance weighted	4	-0.0168688	0.00845615	-0.0334426	-0.000295059	0.0460585	3	-0.0160916	0.0100304	-0.0357507	0.00356756	0.108651	3	-0.0159469	0.00994269	-0.0354342	0.00354045	0.108741
X-11381	Weighted median	4	-0.015907	0.00974197	-0.0350009	0.00318695	0.102505	3	-0.0158959	0.0115132	-0.0384613	0.00666949	0.16738	3	-0.0156918	0.0114256	-0.0380855	0.00670182	0.169628
X-11381	MR-Egger	4	0.000820683	0.123567	-0.241366	0.243007	0.994701	3	-0.0416417	0.142745	-0.321418	0.238134	0.7705	3	-0.0434123	0.147788	-0.333072	0.246248	0.768952
X-11381	MR-Egger intercept	4	-0.00251619	0.0175352	-0.0368845	0.0318522	0.8859	3	0.00353837	0.0197195	-0.0351112	0.0421879	0.857596	3	0.00383636	0.0205962	-0.0365314	0.0442042	0.852237
X-03056	Inverse-variance weighted	4	-0.0368653	0.0101748	-0.0568075	-0.016923	0.000290983	3	-0.0337081	0.0124216	-0.058054	-0.0093623	0.0066541	3	-0.0334491	0.012313	-0.0575822	-0.00931598	0.00659644
X-03056	Weighted median	4	-0.0373684	0.0124414	-0.0617532	-0.0129836	0.00266857	3	-0.0345204	0.0150484	-0.0640147	-0.00502617	0.0217925	3	-0.0343319	0.0149075	-0.0635502	-0.00511369	0.0212794
X-03056	MR-Egger	4	0.14419	0.150726	-0.151228	0.439608	0.338751	3	0.143564	0.187083	-0.223112	0.51024	0.442855	3	0.147433	0.19335	-0.231527	0.526393	0.445751
X-03056	MR-Egger intercept	4	-0.0254485	0.0211372	-0.0668766	0.0159797	0.228603	3	-0.0244132	0.0257074	-0.0747988	0.0259724	0.342288	3	-0.0251255	0.0268028	-0.077658	0.0274071	0.348543
X-11412	Inverse-variance weighted	4	0.0103002	0.00789661	-0.0051769	0.0257773	0.192104	3	0.0071922	0.00983935	-0.0120926	0.026477	0.464802	3	0.00713926	0.00975338	-0.011977	0.0262555	0.464182
X-11412	Weighted median	4	0.0101933	0.00941307	-0.008256	0.0286426	0.278859	3	0.00938403	0.0110827	-0.0123376	0.0311056	0.397145	3	0.00928046	0.0109866	-0.012253	0.0308139	0.398276
X-11412	MR-Egger	4	-0.112763	0.120154	-0.34826	0.122734	0.347993	3	-0.0758023	0.155935	-0.38143	0.229825	0.626887	3	-0.0791004	0.160963	-0.394583	0.236382	0.623131
X-11412	MR-Egger intercept	4	0.01716	0.0167181	-0.0156068	0.0499268	0.304687	3	0.0113824	0.0213433	-0.0304497	0.0532145	0.593826	3	0.0119298	0.0222257	-0.0316318	0.0554914	0.591435
X-01911	Inverse-variance weighted	4	0.0287516	0.0235647	-0.0174345	0.0749376	0.222423	3	0.0377168	0.0286695	-0.0184745	0.0939081	0.188318	3	0.0373973	0.02842	-0.0183049	0.0930995	0.188215
X-01911	Weighted median	4	0.0294528	0.0268433	-0.023159	0.0820646	0.272547	3	0.0383277	0.0328331	-0.026024	0.102679	0.243069	3	0.0378598	0.0325719	-0.0259801	0.1017	0.245096
X-01911	MR-Egger	4	0.0130452	0.350631	-0.674178	0.700268	0.970322	3	-0.0246028	0.415348	-0.838669	0.789464	0.952766	3	-0.0262419	0.429674	-0.868388	0.815904	0.9513
X-01911	MR-Egger intercept	4	0.00222689	0.0496008	-0.094989	0.0994427	0.96419	3	0.00861872	0.057305	-0.103697	0.120934	0.880448	3	0.00887675	0.0598021	-0.108333	0.126087	0.881999
X-11422	Inverse-variance weighted	4	-0.00892998	0.0105702	-0.0296472	0.0117872	0.398208	3	-0.00795146	0.0125379	-0.0325254	0.0166225	0.525956	3	-0.00787112	0.0124284	-0.0322303	0.016488	0.526525
X-11422	Weighted median	4	-0.00874846	0.0120227	-0.0323125	0.0148156	0.46682	3	-0.008724	0.0143535	-0.0368564	0.0194084	0.543323	3	-0.00863274	0.0142444	-0.0365513	0.0192858	0.544486
X-11422	MR-Egger	4	-0.03035	0.154459	-0.333083	0.272383	0.844224	3	-0.0504665	0.178432	-0.400186	0.299253	0.777305	3	-0.0518263	0.184735	-0.413901	0.310249	0.779061
X-11422	MR-Egger intercept	4	0.00304683	0.021919	-0.0399136	0.0460073	0.889447	3	0.00588778	0.0246494	-0.0424242	0.0541997	0.811214	3	0.00613962	0.0257452	-0.0443201	0.0565994	0.811512
X-11423	Inverse-variance weighted	4	-0.0252276	0.00653209	-0.0380302	-0.0124249	0.000112418	3	-0.0237508	0.00857428	-0.0405561	-0.00694553	0.00560553	3	-0.0235536	0.00849937	-0.0402121	-0.0068952	0.0055846
X-11423	Weighted median	4	-0.0276105	0.00791784	-0.0431292	-0.0120919	0.000488233	3	-0.0243841	0.0100994	-0.0441786	-0.00458963	0.0157607	3	-0.0241133	0.00999756	-0.0437081	-0.00451845	0.0158688
X-11423	MR-Egger	4	0.069826	0.105364	-0.136683	0.276335	0.507514	3	0.0809836	0.133388	-0.180452	0.342419	0.543766	3	0.0854255	0.137745	-0.184551	0.355402	0.535146
X-11423	MR-Egger intercept	4	-0.0133669	0.0147883	-0.0423513	0.0156176	0.366056	3	-0.0143845	0.0182819	-0.0502163	0.0214474	0.431391	3	-0.0150969	0.0190456	-0.0524255	0.0222317	0.427968
X-09789	Inverse-variance weighted	4	0.0355452	0.0213518	-0.00630366	0.077394	0.0959654	3	0.037654	0.0254335	-0.0121948	0.0875028	0.138744	3	0.0373568	0.0252059	-0.0120458	0.0867594	0.138322
X-09789	Weighted median	4	0.0333975	0.0244041	-0.0144336	0.0812287	0.171148	3	0.0285478	0.030333	-0.0309038	0.0879993	0.34663	3	0.0283061	0.0300948	-0.0306787	0.0872909	0.346928
X-09789	MR-Egger	4	-0.0487529	0.319637	-0.67523	0.577724	0.878772	3	-0.093844	0.370377	-0.81977	0.632082	0.799979	3	-0.0940866	0.383597	-0.845923	0.657749	0.806244
X-09789	MR-Egger intercept	4	0.0119497	0.0452089	-0.0766582	0.100558	0.791533	3	0.0181125	0.0508953	-0.0816405	0.117866	0.721932	3	0.0182649	0.0531881	-0.0859818	0.122512	0.731296
X-11437	Inverse-variance weighted	4	0.00877752	0.034004	-0.0578691	0.0754241	0.796305	3	0.00189793	0.0402814	-0.0770522	0.0808481	0.96242	3	0.00190907	0.0399234	-0.0763394	0.0801575	0.961861
X-11437	Weighted median	4	0.0109794	0.03874	-0.0649496	0.0869084	0.776861	3	0.00933864	0.0465199	-0.0818388	0.100516	0.840898	3	0.00922254	0.0461185	-0.0811681	0.0996132	0.8415
X-11437	MR-Egger	4	-0.219701	0.514458	-1.22802	0.788618	0.66934	3	-0.163859	0.596653	-1.33328	1.00556	0.7836	3	-0.170476	0.617457	-1.38067	1.03972	0.782476
X-11437	MR-Egger intercept	4	0.0323585	0.0727012	-0.110133	0.17485	0.656255	3	0.0228153	0.0819378	-0.13778	0.18341	0.78067	3	0.0239358	0.0855551	-0.143749	0.191621	0.779653
X-11438	Inverse-variance weighted	4	0.0010017	0.0142533	-0.0269343	0.0289377	0.943972	3	1.44658e-05	0.0168356	-0.0329827	0.0330116	0.999314	3	6.22126e-05	0.0166896	-0.0326487	0.0327731	0.997026
X-11438	Weighted median	4	-0.000461345	0.0165096	-0.0328196	0.0318969	0.977707	3	-0.0076556	0.0200115	-0.0468774	0.0315662	0.702046	3	-0.00756106	0.0198674	-0.0465005	0.0313784	0.703518
X-11438	MR-Egger	4	-0.101629	0.208093	-0.509484	0.306227	0.625281	3	-0.168109	0.239515	-0.637551	0.301332	0.482759	3	-0.171139	0.247901	-0.657016	0.314739	0.489974
X-11438	MR-Egger intercept	4	0.0146119	0.0295575	-0.0433197	0.0725435	0.621056	3	0.0233073	0.0331223	-0.0416112	0.0882257	0.481636	3	0.0239366	0.0345819	-0.0438427	0.091716	0.48883
X-11440	Inverse-variance weighted	4	-0.010467	0.020036	-0.0497368	0.0288028	0.601384	3	-0.0114896	0.0238894	-0.058312	0.0353327	0.630551	3	-0.0113763	0.0236763	-0.0577811	0.0350284	0.630876
X-11440	Weighted median	4	-0.00976673	0.0226986	-0.0542551	0.0347217	0.666992	3	-0.0127327	0.0276745	-0.0669738	0.0415084	0.645454	3	-0.0126463	0.0274622	-0.0664711	0.0411786	0.645159
X-11440	MR-Egger	4	-0.0242959	0.299123	-0.610567	0.561975	0.935264	3	-0.0359242	0.348199	-0.718382	0.646534	0.917827	3	-0.0358387	0.360555	-0.742513	0.670836	0.920822
X-11440	MR-Egger intercept	4	0.00195964	0.0422923	-0.0809317	0.0848509	0.963043	3	0.0033669	0.0478661	-0.090449	0.0971828	0.943923	3	0.00340038	0.0500106	-0.0946186	0.101419	0.945791
X-11441	Inverse-variance weighted	4	-0.0128708	0.0176512	-0.0474666	0.021725	0.465895	3	-0.0144657	0.0210955	-0.0558121	0.0268807	0.492886	3	-0.0144053	0.0209059	-0.0553801	0.0265694	0.490788
X-11441	Weighted median	4	-0.0190856	0.020705	-0.0596667	0.0214954	0.356639	3	-0.0305232	0.0265752	-0.0826097	0.0215632	0.250737	3	-0.0306572	0.0263954	-0.0823913	0.0210768	0.245454
X-11441	MR-Egger	4	0.303325	0.265745	-0.217527	0.824176	0.253699	3	0.369118	0.310545	-0.239538	0.977775	0.234591	3	0.383723	0.321601	-0.246603	1.01405	0.232805
X-11441	MR-Egger intercept	4	-0.044744	0.0375219	-0.118285	0.0287975	0.233074	3	-0.052756	0.0426119	-0.136274	0.0307619	0.215695	3	-0.0552422	0.0445293	-0.142518	0.0320336	0.21476
X-11442	Inverse-variance weighted	4	-0.0441021	0.0175646	-0.0785282	-0.00967603	0.0120443	3	-0.0438852	0.0209565	-0.0849591	-0.00281131	0.0362498	3	-0.0435515	0.0207691	-0.0842582	-0.00284492	0.0359987
X-11442	Weighted median	4	-0.0499644	0.0207532	-0.0906398	-0.00928894	0.0160597	3	-0.0559185	0.0258389	-0.106562	-0.00527518	0.0304551	3	-0.055756	0.0256352	-0.106	-0.00551189	0.0296319
X-11442	MR-Egger	4	0.232372	0.263063	-0.283221	0.747965	0.377056	3	0.272292	0.306592	-0.328617	0.8732	0.374473	3	0.282943	0.317478	-0.339303	0.905189	0.372812
X-11442	MR-Egger intercept	4	-0.0391584	0.0371757	-0.112021	0.0337046	0.292188	3	-0.0435374	0.0421187	-0.126089	0.0390138	0.301285	3	-0.0453547	0.0440078	-0.131608	0.040899	0.302726
X-11444	Inverse-variance weighted	4	-0.00792428	0.0125169	-0.0324569	0.0166084	0.526676	3	-0.0191283	0.0155575	-0.0496204	0.0113638	0.218875	3	-0.0189128	0.0154215	-0.0491384	0.0113128	0.220052
X-11444	Weighted median	4	-0.00266183	0.0149372	-0.0319382	0.0266146	0.858565	3	-0.0181853	0.0188253	-0.0550821	0.0187116	0.334042	3	-0.0178995	0.0186736	-0.054499	0.0187001	0.337789
X-11444	MR-Egger	4	-0.21346	0.190792	-0.587405	0.160484	0.263219	3	-0.247156	0.229368	-0.696708	0.202396	0.281233	3	-0.254412	0.237195	-0.719306	0.210481	0.283456
X-11444	MR-Egger intercept	4	0.029073	0.0269292	-0.0237074	0.0818533	0.280317	3	0.0314647	0.0315767	-0.0304245	0.0933539	0.31903	3	0.0327761	0.0329421	-0.0317893	0.0973415	0.319756
X-11445	Inverse-variance weighted	4	-0.0264481	0.0328404	-0.0908141	0.0379178	0.420615	3	-0.0337601	0.038745	-0.109699	0.0421786	0.383568	3	-0.0334852	0.0384064	-0.10876	0.0417899	0.383282
X-11445	Weighted median	4	-0.023675	0.037982	-0.0981184	0.0507684	0.533073	3	-0.0249212	0.0450197	-0.113158	0.0633157	0.579879	3	-0.0246575	0.0446756	-0.11222	0.0629051	0.581001
X-11445	MR-Egger	4	0.22369	0.485252	-0.727386	1.17477	0.644815	3	0.185233	0.557134	-0.906729	1.2772	0.73953	3	0.197178	0.576606	-0.932949	1.3273	0.732379
X-11445	MR-Egger intercept	4	-0.0355716	0.0688484	-0.170512	0.0993688	0.60539	3	-0.030294	0.0768833	-0.180982	0.120395	0.693562	3	-0.0321832	0.0802719	-0.189513	0.125147	0.688474
X-11452	Inverse-variance weighted	4	0.0202214	0.0224953	-0.0238684	0.0643113	0.368695	3	0.0230286	0.0264185	-0.0287508	0.074808	0.383381	3	0.0228823	0.0261887	-0.0284465	0.0742112	0.382254
X-11452	Weighted median	4	0.0218909	0.0259023	-0.0288767	0.0726584	0.398037	3	0.0308187	0.0310672	-0.0300718	0.0917093	0.321196	3	0.0307953	0.0308338	-0.0296378	0.0912283	0.317915
X-11452	MR-Egger	4	-0.224482	0.335488	-0.882028	0.433063	0.503419	3	-0.267599	0.38503	-1.02224	0.487046	0.48705	3	-0.277331	0.398227	-1.05784	0.50318	0.48617
X-11452	MR-Egger intercept	4	0.034772	0.0475651	-0.0584539	0.127998	0.464754	3	0.0401702	0.0530929	-0.06389	0.14423	0.449288	3	0.0418512	0.0553947	-0.0667203	0.150423	0.449943
X-11469	Inverse-variance weighted	4	0.117427	0.0235731	0.0712242	0.163629	6.31301e-07	3	0.123728	0.0283088	0.068244	0.179213	1.23871e-05	3	0.122631	0.0280574	0.0676391	0.177622	1.23846e-05
X-11469	Weighted median	4	0.118938	0.0282433	0.0635818	0.174293	2.54038e-05	3	0.12399	0.034699	0.0559812	0.191999	0.000352511	3	0.123291	0.0343636	0.0559392	0.190642	0.000333445
X-11469	MR-Egger	4	0.0957089	0.351518	-0.593254	0.784671	0.785412	3	0.124827	0.417738	-0.693924	0.943577	0.76508	3	0.129647	0.432332	-0.717707	0.977001	0.764269
X-11469	MR-Egger intercept	4	0.00306895	0.0495616	-0.09407	0.100208	0.950625	3	-0.000151253	0.0573909	-0.112635	0.112333	0.997897	3	-0.000974666	0.0599281	-0.118432	0.116482	0.987024
X-11470	Inverse-variance weighted	4	-0.0116462	0.0136745	-0.0384478	0.0151554	0.394397	3	-0.0146235	0.0159781	-0.0459399	0.0166929	0.360075	3	-0.0144666	0.0158384	-0.0455094	0.0165762	0.36104
X-11470	Weighted median	4	-0.0133347	0.0158395	-0.0443795	0.0177101	0.399865	3	-0.0180796	0.0186972	-0.0547254	0.0185663	0.333561	3	-0.0178956	0.0185424	-0.054238	0.0184468	0.334485
X-11470	MR-Egger	4	-0.12167	0.206848	-0.527084	0.283744	0.556391	3	-0.127327	0.235321	-0.588549	0.333894	0.588453	3	-0.129888	0.243359	-0.606863	0.347087	0.593529
X-11470	MR-Egger intercept	4	0.015631	0.0293224	-0.0418398	0.0731018	0.593983	3	0.0155532	0.0323994	-0.0479486	0.0790549	0.631196	3	0.0160655	0.0338015	-0.0501842	0.0823153	0.63458
X-11478	Inverse-variance weighted	4	0.0351262	0.0179652	-8.49069e-05	0.0703373	0.050555	3	0.0430349	0.0217761	0.000354561	0.0857152	0.0481269	3	0.0426551	0.0215858	0.000347755	0.0849624	0.0481464
X-11478	Weighted median	4	0.0332456	0.020774	-0.00747064	0.0739618	0.109521	3	0.0398832	0.0252381	-0.00958251	0.0893489	0.114043	3	0.0395898	0.0250072	-0.0094234	0.088603	0.11339
X-11478	MR-Egger	4	0.0326241	0.264512	-0.48581	0.551058	0.90184	3	0.000289925	0.322924	-0.63263	0.63321	0.999284	3	-0.00245933	0.333887	-0.656866	0.651947	0.994123
X-11478	MR-Egger intercept	4	0.0003527	0.0372	-0.0725579	0.0732633	0.992435	3	0.00589497	0.0444332	-0.0811926	0.0929825	0.894454	3	0.00627544	0.0463466	-0.0845623	0.0971132	0.892294
X-11483	Inverse-variance weighted	4	-0.00276225	0.0253247	-0.0523978	0.0468733	0.913145	3	0.00399554	0.0301851	-0.0551662	0.0631573	0.894693	3	0.00401741	0.0299148	-0.0546146	0.0626494	0.893169
X-11483	Weighted median	4	-0.00408155	0.0288872	-0.0606995	0.0525364	0.887639	3	0.00958901	0.035681	-0.0603444	0.0795224	0.788127	3	0.00973941	0.0354198	-0.0596822	0.079161	0.783339
X-11483	MR-Egger	4	-0.210913	0.379005	-0.95375	0.531924	0.577875	3	-0.271881	0.439697	-1.13367	0.58991	0.536353	3	-0.281157	0.455393	-1.17371	0.611397	0.536975
X-11483	MR-Egger intercept	4	0.029502	0.0535977	-0.0755475	0.134551	0.582022	3	0.037997	0.0604175	-0.0804191	0.156413	0.52941	3	0.0396246	0.0631396	-0.0841267	0.163376	0.530285
X-11485	Inverse-variance weighted	4	-0.0107448	0.0203889	-0.0507064	0.0292168	0.598199	3	-0.00865008	0.0243082	-0.0562933	0.0389932	0.721953	3	-0.00853645	0.0240915	-0.0557549	0.038682	0.723088
X-11485	Weighted median	4	-0.0115834	0.023147	-0.0569507	0.0337838	0.616773	3	-0.0133344	0.0285212	-0.069235	0.0425662	0.640124	3	-0.0131774	0.0283152	-0.0686742	0.0423194	0.641658
X-11485	MR-Egger	4	-0.104164	0.304274	-0.70053	0.492203	0.732099	3	-0.145275	0.354144	-0.839384	0.548833	0.681648	3	-0.148346	0.366709	-0.867083	0.570391	0.685821
X-11485	MR-Egger intercept	4	0.0132388	0.0430232	-0.071085	0.0975627	0.7583	3	0.0188275	0.0486873	-0.0765978	0.114253	0.698976	3	0.0194358	0.0508682	-0.0802642	0.119136	0.702402
X-11491	Inverse-variance weighted	4	-0.0805533	0.0223266	-0.124313	-0.0367939	0.000308628	3	-0.0815459	0.0267292	-0.133934	-0.0291576	0.00228221	3	-0.0808775	0.0264956	-0.132808	-0.028947	0.00226956
X-11491	Weighted median	4	-0.0773497	0.0265163	-0.129321	-0.0253786	0.00353353	3	-0.0838285	0.0317379	-0.146034	-0.0216234	0.00825945	3	-0.0832773	0.0314673	-0.144952	-0.0216026	0.00813358
X-11491	MR-Egger	4	0.163532	0.328034	-0.479402	0.806466	0.618116	3	0.131822	0.389519	-0.631621	0.895264	0.735045	3	0.135738	0.402955	-0.65404	0.925515	0.736226
X-11491	MR-Egger intercept	4	-0.0345542	0.0463308	-0.125361	0.0562524	0.455779	3	-0.0294754	0.0536826	-0.134691	0.0757406	0.582959	3	-0.0301819	0.056024	-0.139987	0.0796231	0.590072
X-11497	Inverse-variance weighted	4	0.0187197	0.0101314	-0.00113734	0.0385768	0.0646452	3	0.0201787	0.011986	-0.00331347	0.0436709	0.0922747	3	0.0200201	0.0118813	-0.00326679	0.0433069	0.0919865
X-11497	Weighted median	4	0.0183941	0.0116057	-0.00435275	0.0411409	0.112986	3	0.0164787	0.0140938	-0.0111446	0.044102	0.242315	3	0.0163895	0.0139793	-0.0110095	0.0437884	0.241033
X-11497	MR-Egger	4	-0.00523501	0.149113	-0.29749	0.28702	0.971994	3	-0.0357167	0.171999	-0.372828	0.301395	0.835497	3	-0.0355353	0.178023	-0.384454	0.313383	0.841785
X-11497	MR-Egger intercept	4	0.00340554	0.0211497	-0.038047	0.0448581	0.872077	3	0.00773385	0.0237404	-0.0387965	0.0542642	0.7446	3	0.00775301	0.0247885	-0.0408316	0.0563376	0.754458
HWESASXX*	Inverse-variance weighted	4	-0.0613653	0.0192384	-0.0990718	-0.0236587	0.00142405	3	-0.0623821	0.0232653	-0.107981	-0.016783	0.0073328	3	-0.0618629	0.0230619	-0.107064	-0.0166623	0.00730813
HWESASXX*	Weighted median	4	-0.0634035	0.0223904	-0.107288	-0.0195192	0.00462963	3	-0.0622926	0.0271481	-0.115502	-0.00908337	0.0217589	3	-0.0618451	0.0269252	-0.114618	-0.00907257	0.0216234
HWESASXX*	MR-Egger	4	0.022058	0.286105	-0.538699	0.582814	0.938546	3	0.0539475	0.337029	-0.606617	0.714512	0.872828	3	0.0551129	0.348722	-0.628369	0.738595	0.874423
HWESASXX*	MR-Egger intercept	4	-0.0118302	0.0404805	-0.0911706	0.0675102	0.7701	3	-0.0160798	0.0464752	-0.10717	0.0750099	0.729352	3	-0.0163085	0.0485116	-0.111389	0.0787725	0.736737
X-11521	Inverse-variance weighted	4	-0.00492503	0.0152146	-0.034745	0.024895	0.746161	3	-0.00574685	0.0177359	-0.0405085	0.0290148	0.74592	3	-0.00568003	0.0175809	-0.0401379	0.0287778	0.746635
X-11521	Weighted median	4	-0.00858849	0.0182386	-0.0443355	0.0271585	0.637715	3	-0.0144029	0.0218577	-0.0572433	0.0284375	0.509937	3	-0.0140668	0.0216553	-0.0565104	0.0283768	0.515964
X-11521	MR-Egger	4	-0.211034	0.232082	-0.665905	0.243838	0.363188	3	-0.22814	0.283508	-0.783806	0.327527	0.420992	3	-0.241786	0.288234	-0.806715	0.323142	0.401551
X-11521	MR-Egger intercept	4	0.02926	0.0328763	-0.0351764	0.0936963	0.373465	3	0.0306601	0.0389975	-0.0457735	0.107094	0.431745	3	0.0328317	0.039997	-0.045561	0.111224	0.41173
X-11529	Inverse-variance weighted	4	-0.0696129	0.0253272	-0.119253	-0.0199724	0.00598616	3	-0.0765039	0.0303456	-0.13598	-0.0170277	0.0116992	3	-0.0758269	0.0300804	-0.134783	-0.0168704	0.0117086
X-11529	Weighted median	4	-0.0668291	0.0293643	-0.124382	-0.00927615	0.0228542	3	-0.076958	0.0353531	-0.146249	-0.00766722	0.0294925	3	-0.0759307	0.0350845	-0.144695	-0.00716626	0.0304474
X-11529	MR-Egger	4	-0.168976	0.372046	-0.898174	0.560222	0.649699	3	-0.143288	0.442537	-1.01064	0.724068	0.746099	3	-0.14936	0.457792	-1.04662	0.747895	0.744226
X-11529	MR-Egger intercept	4	0.0140631	0.0525346	-0.0889028	0.117029	0.788936	3	0.00922511	0.0609853	-0.110304	0.128754	0.879764	3	0.010245	0.0636437	-0.114494	0.134984	0.872114
X-11530	Inverse-variance weighted	4	-0.0483483	0.0164157	-0.0805225	-0.016174	0.00322705	3	-0.0519647	0.019556	-0.0902938	-0.0136355	0.00787882	3	-0.0515451	0.0193819	-0.089533	-0.0135572	0.00782704
X-11530	Weighted median	4	-0.0472417	0.0195871	-0.0856318	-0.00885158	0.0158709	3	-0.0588717	0.024113	-0.106132	-0.0116111	0.0146266	3	-0.0582239	0.0239239	-0.105114	-0.011334	0.0149446
X-11530	MR-Egger	4	0.226871	0.244903	-0.25313	0.706873	0.354253	3	0.217829	0.284821	-0.340409	0.776068	0.444394	3	0.228075	0.29491	-0.349938	0.806088	0.439302
X-11530	MR-Egger intercept	4	-0.0390092	0.0346341	-0.106891	0.0288724	0.260029	3	-0.0371861	0.0391646	-0.113947	0.0395751	0.342376	3	-0.038879	0.0409162	-0.119073	0.0413153	0.342006
X-11537	Inverse-variance weighted	4	-0.017006	0.024242	-0.0645194	0.0305074	0.482985	3	-0.0244545	0.0287313	-0.0807668	0.0318578	0.394689	3	-0.0242707	0.0284791	-0.0800888	0.0315473	0.394087
X-11537	Weighted median	4	-0.0130933	0.0275748	-0.0671388	0.0409523	0.63491	3	-0.0304132	0.0329466	-0.0949874	0.034161	0.355953	3	-0.0301054	0.0326954	-0.0941872	0.0339764	0.357163
X-11537	MR-Egger	4	0.080476	0.357648	-0.620501	0.781452	0.821968	3	0.149336	0.41331	-0.660738	0.959409	0.717863	3	0.155604	0.427832	-0.682932	0.994141	0.716079
X-11537	MR-Egger intercept	4	-0.0138495	0.0506948	-0.11321	0.0855106	0.784705	3	-0.0240265	0.0570019	-0.135748	0.0876952	0.673388	3	-0.0250829	0.0595272	-0.141754	0.0915883	0.673486
X-11538	Inverse-variance weighted	4	-0.0219447	0.0151755	-0.0516882	0.00779869	0.148159	3	-0.0323944	0.0187531	-0.0691498	0.004361	0.084093	3	-0.0321012	0.0185892	-0.0685354	0.00433299	0.0841905
X-11538	Weighted median	4	-0.0243138	0.0176856	-0.0589769	0.0103493	0.169199	3	-0.0294517	0.0216758	-0.0719356	0.0130321	0.174231	3	-0.0290616	0.0214822	-0.071166	0.0130428	0.176113
X-11538	MR-Egger	4	-0.0823287	0.22966	-0.532453	0.367796	0.719983	3	-0.0899181	0.276432	-0.631715	0.451879	0.744968	3	-0.0932149	0.285867	-0.653503	0.467073	0.744365
X-11538	MR-Egger intercept	4	0.00853816	0.0324024	-0.0549694	0.0720457	0.792162	3	0.00793762	0.0380566	-0.066652	0.0825272	0.834781	3	0.00850574	0.0397024	-0.0693096	0.0863211	0.830362
X-11540	Inverse-variance weighted	4	-0.0391878	0.0238681	-0.0859683	0.00759275	0.100621	3	-0.044079	0.0281712	-0.0992936	0.0111355	0.117657	3	-0.0437301	0.0279239	-0.09846	0.0109999	0.117339
X-11540	Weighted median	4	-0.0389536	0.0273273	-0.0925142	0.014607	0.154029	3	-0.0520594	0.0326529	-0.116058	0.0119392	0.110863	3	-0.0514937	0.0323982	-0.114993	0.0120057	0.11197
X-11540	MR-Egger	4	0.104084	0.354389	-0.590505	0.798673	0.768988	3	0.17063	0.406878	-0.626836	0.968095	0.67495	3	0.177799	0.421119	-0.647579	1.00318	0.672875
X-11540	MR-Egger intercept	4	-0.0203618	0.0502514	-0.118853	0.0781292	0.685332	3	-0.0296712	0.0560926	-0.139611	0.0802682	0.596828	3	-0.0308786	0.0585699	-0.145674	0.0839163	0.598048
X-11546	Inverse-variance weighted	4	0.0561068	0.0402863	-0.0228529	0.135066	0.16371	3	0.0557133	0.0475999	-0.0375809	0.149007	0.241821	3	0.0552312	0.0471796	-0.0372391	0.147702	0.241736
X-11546	Weighted median	4	0.0529322	0.0458876	-0.0370057	0.14287	0.248697	3	0.0563901	0.0548746	-0.0511621	0.163942	0.30413	3	0.0561174	0.0544457	-0.0505942	0.162829	0.30268
X-11546	MR-Egger	4	0.108647	0.596811	-1.06108	1.27837	0.855547	3	0.0495529	0.686671	-1.2963	1.3954	0.942471	3	0.0533358	0.710929	-1.34006	1.44673	0.940197
X-11546	MR-Egger intercept	4	-0.00746302	0.0845804	-0.173237	0.158311	0.929689	3	0.000850757	0.094603	-0.184568	0.186269	0.992825	3	0.000264051	0.0988175	-0.193415	0.193943	0.997868
X-11550	Inverse-variance weighted	4	0.00623711	0.00467862	-0.00293281	0.015407	0.182496	3	0.00506471	0.00558928	-0.00589009	0.0160195	0.364859	3	0.00502266	0.00553935	-0.00583428	0.0158796	0.364553
X-11550	Weighted median	4	0.00531972	0.00538363	-0.005232	0.0158714	0.32309	3	0.00460107	0.0065054	-0.00814928	0.0173514	0.479399	3	0.00457938	0.00645542	-0.00807301	0.0172318	0.478086
X-11550	MR-Egger	4	0.004056	0.0696704	-0.132495	0.140607	0.953576	3	-0.00315339	0.0812091	-0.16232	0.156014	0.969026	3	-0.00290865	0.0841049	-0.167751	0.161934	0.972412
X-11550	MR-Egger intercept	4	0.000309075	0.00985041	-0.0189974	0.0196155	0.974969	3	0.00113249	0.0111645	-0.0207495	0.0230145	0.919203	3	0.0011026	0.0116668	-0.0217639	0.0239691	0.924706
X-11552	Inverse-variance weighted	4	-0.0614207	0.0176345	-0.0959837	-0.0268577	0.00049585	3	-0.0701017	0.0209257	-0.111115	-0.0290881	0.000808025	3	-0.0695031	0.0207417	-0.110156	-0.0288501	0.000805542
X-11552	Weighted median	4	-0.0618424	0.0208279	-0.102664	-0.0210206	0.00298561	3	-0.0689413	0.0248974	-0.117739	-0.0201432	0.00562263	3	-0.0685972	0.0246915	-0.116992	-0.0202027	0.00546663
X-11552	MR-Egger	4	-0.0392819	0.260015	-0.548902	0.470338	0.879916	3	-0.0379397	0.300785	-0.627467	0.551588	0.899625	3	-0.0418448	0.311384	-0.652146	0.568457	0.8931
X-11552	MR-Egger intercept	4	-0.00314486	0.0368507	-0.0753708	0.0690811	0.931991	3	-0.00444583	0.0414774	-0.08574	0.0768484	0.914641	3	-0.0038564	0.0433199	-0.0887618	0.081049	0.929065
X-11593	Inverse-variance weighted	4	-0.0286856	0.0066421	-0.0417039	-0.0156673	1.56915e-05	3	-0.0269416	0.00857428	-0.0437469	-0.0101364	0.00167715	3	-0.0267026	0.00849937	-0.0433611	-0.0100442	0.00167958
X-11593	Weighted median	4	-0.0285042	0.00797158	-0.0441282	-0.0128802	0.000349252	3	-0.0269939	0.0099356	-0.0464674	-0.00752052	0.00658985	3	-0.0268112	0.00984405	-0.0461052	-0.00751724	0.00645754
X-11593	MR-Egger	4	0.0108391	0.105631	-0.196194	0.217872	0.91827	3	-0.0237984	0.133388	-0.285234	0.237637	0.858397	3	-0.0235151	0.137745	-0.293491	0.246461	0.864449
X-11593	MR-Egger intercept	4	-0.00555435	0.0148148	-0.0345909	0.0234822	0.707721	3	-0.000431695	0.0182819	-0.0362636	0.0354002	0.981161	3	-0.00044157	0.0190456	-0.0377702	0.036887	0.981503
adrenate (22:4n6)	Inverse-variance weighted	4	-0.0111972	0.01205	-0.0348147	0.0124203	0.352771	3	-0.0157488	0.0142097	-0.0435992	0.0121017	0.267726	3	-0.0155932	0.0140855	-0.0432002	0.0120139	0.268278
adrenate (22:4n6)	Weighted median	4	-0.00653232	0.0139971	-0.0339661	0.0209015	0.640721	3	-0.013398	0.0164145	-0.0455699	0.0187738	0.414369	3	-0.0131938	0.0162922	-0.0451259	0.0187383	0.418042
adrenate (22:4n6)	MR-Egger	4	-0.12193	0.177154	-0.469145	0.225286	0.491283	3	-0.118461	0.202223	-0.51481	0.277888	0.558012	3	-0.123441	0.209367	-0.533792	0.286911	0.555465
adrenate (22:4n6)	MR-Egger intercept	4	0.0157697	0.0251706	-0.0335637	0.0651032	0.530978	3	0.0142244	0.027936	-0.0405292	0.0689779	0.610628	3	0.0150641	0.0291779	-0.0421236	0.0722518	0.605657
homostachydrine*	Inverse-variance weighted	4	-0.0121042	0.0246655	-0.0604477	0.0362394	0.623616	3	-0.0114524	0.0292678	-0.0688163	0.0459115	0.695578	3	-0.0113293	0.029012	-0.0681918	0.0455333	0.696165
homostachydrine*	Weighted median	4	-0.0112842	0.0279994	-0.066162	0.0435937	0.686938	3	-0.014375	0.0336577	-0.0803429	0.0515928	0.66931	3	-0.014266	0.0333993	-0.0797274	0.0511954	0.669282
homostachydrine*	MR-Egger	4	-0.0352368	0.364899	-0.750425	0.679952	0.923071	3	-0.0648603	0.420824	-0.889661	0.759941	0.87751	3	-0.0643939	0.435534	-0.918024	0.789236	0.882461
homostachydrine*	MR-Egger intercept	4	0.00328847	0.0517543	-0.0981481	0.104725	0.949336	3	0.00738812	0.0580733	-0.106434	0.12121	0.898766	3	0.00740387	0.0606331	-0.111435	0.126243	0.902812
ADSGEGDFXAEGGGVR*	Inverse-variance weighted	4	0.00577312	0.0172497	-0.0280356	0.0395819	0.737867	3	0.00237567	0.0204632	-0.0377315	0.0424829	0.907577	3	0.00234708	0.0202855	-0.0374117	0.0421059	0.907888
ADSGEGDFXAEGGGVR*	Weighted median	4	0.0105074	0.0196362	-0.0279789	0.0489937	0.592579	3	0.00532834	0.0233915	-0.0405182	0.0511749	0.81981	3	0.00524387	0.0232075	-0.040242	0.0507297	0.821236
ADSGEGDFXAEGGGVR*	MR-Egger	4	0.0375997	0.254177	-0.460579	0.535778	0.8824	3	0.0818683	0.292535	-0.49149	0.655227	0.779587	3	0.0865891	0.302741	-0.506773	0.679951	0.774865
ADSGEGDFXAEGGGVR*	MR-Egger intercept	4	-0.00452941	0.03609	-0.0752645	0.0662056	0.900125	3	-0.0110121	0.0404258	-0.0902452	0.0682209	0.785311	3	-0.01177	0.0422028	-0.0944859	0.0709459	0.780328
X-11786	Inverse-variance weighted	4	-0.0107656	0.0187633	-0.047541	0.0260099	0.566133	3	-0.00904025	0.02218	-0.0525122	0.0344317	0.683578	3	-0.00901694	0.0219851	-0.0521069	0.034073	0.681704
X-11786	Weighted median	4	-0.0162722	0.0221132	-0.0596132	0.0270688	0.461816	3	-0.0168143	0.0266833	-0.0691125	0.0354839	0.528601	3	-0.0167383	0.0264954	-0.0686683	0.0351917	0.527554
X-11786	MR-Egger	4	0.307178	0.277573	-0.236856	0.851212	0.268443	3	0.327739	0.318627	-0.296758	0.952236	0.303668	3	0.342205	0.329856	-0.304301	0.988712	0.299532
X-11786	MR-Egger intercept	4	-0.0452028	0.039373	-0.122372	0.0319668	0.250941	3	-0.0465585	0.0439422	-0.132684	0.0395665	0.289353	3	-0.0489758	0.0458942	-0.138927	0.0409752	0.285906
X-11787	Inverse-variance weighted	4	-0.0037513	0.0057925	-0.0151044	0.00760179	0.517235	3	-0.00333093	0.00680075	-0.0166601	0.00999829	0.624284	3	-0.00331055	0.00674238	-0.0165254	0.00990427	0.623422
X-11787	Weighted median	4	-0.00332772	0.00665721	-0.0163756	0.00972016	0.617168	3	-0.00239577	0.00776333	-0.0176116	0.0128201	0.757625	3	-0.00239347	0.00770508	-0.0174951	0.0127082	0.756078
X-11787	MR-Egger	4	0.0215808	0.0844863	-0.144009	0.187171	0.798387	3	0.0143519	0.0967439	-0.175263	0.203967	0.882067	3	0.0138348	0.100086	-0.18233	0.21	0.89006
X-11787	MR-Egger intercept	4	-0.00361147	0.0120164	-0.0271632	0.0199403	0.763762	3	-0.00245503	0.0133984	-0.0287154	0.0238053	0.854615	3	-0.00240053	0.0139813	-0.0298033	0.0250022	0.863677
X-11792	Inverse-variance weighted	4	-0.0367823	0.0346031	-0.104603	0.0310385	0.287792	3	-0.0402257	0.0408359	-0.120262	0.0398112	0.324596	3	-0.0398102	0.040479	-0.119148	0.0395271	0.325372
X-11792	Weighted median	4	-0.0320937	0.0401429	-0.110772	0.0465849	0.424009	3	-0.0332578	0.0477266	-0.1268	0.0602845	0.485902	3	-0.0326826	0.0473741	-0.125534	0.060169	0.490268
X-11792	MR-Egger	4	-0.428659	0.510999	-1.4302	0.572881	0.401546	3	-0.441639	0.586875	-1.59189	0.708616	0.451735	3	-0.46114	0.607398	-1.65162	0.729339	0.44773
X-11792	MR-Egger intercept	4	0.0557287	0.0725023	-0.0863733	0.197831	0.442103	3	0.0555319	0.0809921	-0.10321	0.214273	0.492937	3	0.0587892	0.0845634	-0.106952	0.22453	0.486925
X-11793	Inverse-variance weighted	4	-0.0335961	0.0151755	-0.0633396	-0.00385268	0.0268399	3	-0.0356755	0.018156	-0.0712607	-9.03472e-05	0.0494212	3	-0.0353581	0.0179922	-0.0706221	-9.40791e-05	0.0493919
X-11793	Weighted median	4	-0.0333294	0.0174352	-0.0675017	0.000842959	0.0559255	3	-0.0360935	0.0213387	-0.0779165	0.00572956	0.0907494	3	-0.0359124	0.0211531	-0.0773717	0.00554686	0.089557
X-11793	MR-Egger	4	-0.0757098	0.22966	-0.525834	0.374415	0.741656	3	-0.0334305	0.26896	-0.560583	0.493722	0.901081	3	-0.0356431	0.27855	-0.58159	0.510304	0.898181
X-11793	MR-Egger intercept	4	0.00595478	0.0324024	-0.0575528	0.0694624	0.854189	3	-0.000308443	0.0368682	-0.0725687	0.0719519	0.993325	3	3.95151e-05	0.0385304	-0.0754788	0.0755578	0.999182
X-11795	Inverse-variance weighted	4	0.0970751	0.012438	0.072697	0.121453	5.96379e-15	3	0.0965506	0.0149451	0.0672588	0.125842	1.04448e-10	3	0.0956906	0.0148092	0.0666652	0.124716	1.03619e-10
X-11795	Weighted median	4	0.0960974	0.0163295	0.0640922	0.128103	3.98274e-09	3	0.093701	0.020068	0.0543684	0.133034	3.02425e-06	3	0.0932058	0.0198517	0.0542971	0.132114	2.66481e-06
X-11795	MR-Egger	4	0.075863	0.188534	-0.293657	0.445383	0.687402	3	0.0478789	0.221817	-0.386875	0.482633	0.829106	3	0.0516944	0.229798	-0.398701	0.50209	0.822014
X-11795	MR-Egger intercept	4	0.00299683	0.026578	-0.0490952	0.0550888	0.910224	3	0.00668019	0.0303753	-0.0528543	0.0662146	0.825932	3	0.00609271	0.0317568	-0.0561496	0.068335	0.847856
X-11799	Inverse-variance weighted	4	-0.0579379	0.0320053	-0.120667	0.00479135	0.0702556	3	-0.0698095	0.0379648	-0.144219	0.00460012	0.0659452	3	-0.0691203	0.0376297	-0.142873	0.00463253	0.0662312
X-11799	Weighted median	4	-0.0511397	0.0374296	-0.1245	0.022221	0.171848	3	-0.062957	0.0447033	-0.150574	0.0246597	0.159033	3	-0.0621504	0.0443816	-0.149137	0.024836	0.161405
X-11799	MR-Egger	4	-0.414599	0.473626	-1.34289	0.513691	0.381371	3	-0.416328	0.546451	-1.48735	0.654696	0.446134	3	-0.430694	0.56578	-1.5396	0.678215	0.446514
X-11799	MR-Egger intercept	4	0.050661	0.0671211	-0.0808939	0.182216	0.450387	3	0.0478693	0.0753063	-0.0997283	0.195467	0.524997	3	0.0503837	0.0786644	-0.103796	0.204563	0.521855
X-11805	Inverse-variance weighted	4	-0.0508433	0.0302495	-0.110131	0.00844455	0.0928017	3	-0.0508765	0.0362482	-0.121922	0.0201688	0.160451	3	-0.0504059	0.0359304	-0.120828	0.0200164	0.160654
X-11805	Weighted median	4	-0.0535908	0.0348345	-0.121865	0.0146837	0.123942	3	-0.0539366	0.042179	-0.136606	0.0287327	0.200983	3	-0.0531809	0.0418595	-0.135224	0.0288622	0.20392
X-11805	MR-Egger	4	-0.185864	0.450446	-1.06872	0.696994	0.679883	3	-0.257572	0.524843	-1.28625	0.771102	0.623597	3	-0.270464	0.543144	-1.33501	0.794079	0.618513
X-11805	MR-Egger intercept	4	0.0191627	0.0637849	-0.105853	0.144179	0.763851	3	0.0285601	0.0723471	-0.113237	0.170358	0.693016	3	0.0306694	0.0755321	-0.117371	0.17871	0.68471
X-11818	Inverse-variance weighted	4	0.0343338	0.0115411	0.0117135	0.056954	0.00293081	3	0.0378663	0.0136583	0.0110964	0.0646361	0.00556457	3	0.0375168	0.013539	0.010981	0.0640527	0.00558798
X-11818	Weighted median	4	0.0339942	0.0134504	0.00763191	0.0603565	0.0114918	3	0.0379421	0.0160464	0.00649176	0.0693925	0.0180532	3	0.0375816	0.0159206	0.00637775	0.0687854	0.0182473
X-11818	MR-Egger	4	0.121422	0.169708	-0.2112	0.454043	0.474316	3	0.116917	0.195791	-0.266827	0.50066	0.550407	3	0.120541	0.202656	-0.276657	0.517739	0.551972
X-11818	MR-Egger intercept	4	-0.0123817	0.0240723	-0.0595626	0.0347992	0.607004	3	-0.0109389	0.0270272	-0.0639113	0.0420336	0.685673	3	-0.0115877	0.0282215	-0.0669009	0.0437254	0.681367
X-11820	Inverse-variance weighted	4	-0.0190607	0.0155739	-0.049585	0.0114636	0.220995	3	-0.0234514	0.018389	-0.0594931	0.0125904	0.202205	3	-0.0232612	0.0182283	-0.0589879	0.0124656	0.201919
X-11820	Weighted median	4	-0.0196019	0.0178496	-0.0545864	0.0153827	0.272131	3	-0.0208554	0.02101	-0.0620343	0.0203234	0.320884	3	-0.0206916	0.020849	-0.0615549	0.0201718	0.320979
X-11820	MR-Egger	4	0.035507	0.228646	-0.41263	0.483644	0.87659	3	0.0277185	0.2617	-0.485204	0.540641	0.915648	3	0.0277852	0.270945	-0.503258	0.558828	0.918321
X-11820	MR-Egger intercept	4	-0.00776908	0.0324778	-0.0714245	0.0558863	0.810941	3	-0.00708637	0.0361525	-0.0779439	0.0637712	0.8446	3	-0.00713012	0.0377597	-0.0811378	0.0668775	0.850227
X-11843	Inverse-variance weighted	4	-0.0622153	0.0360976	-0.132965	0.00853469	0.0847927	3	-0.0619171	0.043023	-0.146241	0.0224064	0.150104	3	-0.0614551	0.0426405	-0.145029	0.0221188	0.149518
X-11843	Weighted median	4	-0.0740136	0.0417362	-0.155815	0.00778791	0.0761681	3	-0.0808679	0.0511091	-0.18104	0.019304	0.11359	3	-0.0800544	0.0507244	-0.179472	0.0193635	0.114514
X-11843	MR-Egger	4	0.350738	0.536332	-0.700454	1.40193	0.51314	3	0.432149	0.623578	-0.790041	1.65434	0.4883	3	0.450171	0.645713	-0.815404	1.71575	0.485697
X-11843	MR-Egger intercept	4	-0.0585572	0.0758801	-0.207279	0.090165	0.440288	3	-0.0681418	0.0857992	-0.236305	0.100021	0.427078	3	-0.0711824	0.0896418	-0.246877	0.104512	0.427151
X-11845	Inverse-variance weighted	4	0.0530784	0.0387562	-0.0228823	0.129039	0.170829	3	0.057719	0.0463016	-0.0330304	0.148468	0.212548	3	0.0573126	0.0458938	-0.0326376	0.147263	0.211735
X-11845	Weighted median	4	0.0546165	0.0444098	-0.0324251	0.141658	0.218761	3	0.0450518	0.055071	-0.0628855	0.152989	0.413319	3	0.044796	0.0546551	-0.062326	0.151918	0.412437
X-11845	MR-Egger	4	-0.128576	0.572938	-1.25151	0.994361	0.822434	3	-0.329131	0.674444	-1.65102	0.992756	0.625548	3	-0.334716	0.697974	-1.70272	1.03329	0.631544
X-11845	MR-Egger intercept	4	0.0257295	0.0809648	-0.132959	0.184418	0.750647	3	0.0533915	0.0928647	-0.12862	0.235403	0.565332	3	0.0545764	0.0969583	-0.135458	0.244611	0.573513
X-11847	Inverse-variance weighted	4	0.143932	0.0375085	0.0704169	0.217448	0.000124384	3	0.164122	0.044697	0.0765175	0.251726	0.000240773	3	0.162706	0.0442999	0.0758803	0.249533	0.000239867
X-11847	Weighted median	4	0.146876	0.0439087	0.0608163	0.232935	0.000822744	3	0.155771	0.0543185	0.049309	0.262234	0.00413415	3	0.154932	0.0538462	0.0493953	0.260469	0.00401088
X-11847	MR-Egger	4	0.154712	0.556934	-0.936858	1.24628	0.781172	3	0.0352937	0.64736	-1.23351	1.3041	0.956521	3	0.0404734	0.670336	-1.27336	1.35431	0.951855
X-11847	MR-Egger intercept	4	-0.00152872	0.0788033	-0.15598	0.152923	0.984523	3	0.0177707	0.0890845	-0.156832	0.192373	0.841886	3	0.0170087	0.0930731	-0.165411	0.199429	0.854998
X-11849	Inverse-variance weighted	4	0.191912	0.0384196	0.116611	0.267213	5.87879e-07	3	0.204898	0.0454564	0.115805	0.293991	6.55732e-06	3	0.203163	0.0450551	0.114856	0.291469	6.50725e-06
X-11849	Weighted median	4	0.189043	0.0462327	0.0984291	0.279658	4.33314e-05	3	0.188815	0.0569717	0.0771521	0.300477	0.000919119	3	0.187744	0.0564384	0.0771265	0.298361	0.000879365
X-11849	MR-Egger	4	0.0925443	0.575882	-1.03616	1.22125	0.87233	3	-0.0334598	0.666004	-1.3388	1.27188	0.959931	3	-0.0281958	0.689205	-1.37901	1.32262	0.967367
X-11849	MR-Egger intercept	4	0.0140921	0.0814884	-0.145622	0.173806	0.862703	3	0.0328682	0.0916239	-0.146711	0.212448	0.719798	3	0.0321809	0.0956604	-0.15531	0.219672	0.736563
X-11850	Inverse-variance weighted	4	0.0428003	0.0369607	-0.0296413	0.115242	0.246866	3	0.0361426	0.0453222	-0.0526873	0.124972	0.425185	3	0.0357622	0.0449201	-0.0522796	0.123804	0.425957
X-11850	Weighted median	4	0.0463129	0.0421073	-0.0362159	0.128842	0.271385	3	0.0247809	0.053357	-0.0797969	0.129359	0.642336	3	0.0243893	0.0529047	-0.0793021	0.128081	0.644796
X-11850	MR-Egger	4	0.249322	0.560095	-0.848443	1.34709	0.656217	3	0.423019	0.667981	-0.886199	1.73224	0.526551	3	0.441451	0.691306	-0.913484	1.79638	0.523099
X-11850	MR-Egger intercept	4	-0.0291994	0.0790172	-0.18407	0.125671	0.711731	3	-0.0532858	0.0917913	-0.233193	0.126622	0.56157	3	-0.0563663	0.0958469	-0.244223	0.13149	0.556474
X-11852	Inverse-variance weighted	4	9.72272e-05	0.0398259	-0.0779601	0.0781545	0.998052	3	0.00138125	0.0478406	-0.0923845	0.095147	0.976967	3	0.00142501	0.0474164	-0.0915094	0.0943594	0.976025
X-11852	Weighted median	4	0.00103414	0.0456723	-0.088482	0.0905503	0.981935	3	0.00668207	0.0564138	-0.103887	0.117251	0.905713	3	0.0067626	0.0559795	-0.102955	0.11648	0.903846
X-11852	MR-Egger	4	-0.226217	0.591969	-1.38646	0.934021	0.702355	3	-0.405289	0.703648	-1.78441	0.973836	0.564627	3	-0.424924	0.728234	-1.85224	1.00239	0.559557
X-11852	MR-Egger intercept	4	0.0319895	0.083485	-0.131638	0.195617	0.701589	3	0.0560277	0.0967185	-0.133537	0.245592	0.562396	3	0.0592529	0.100993	-0.13869	0.257196	0.557405
X-11858	Inverse-variance weighted	4	0.195948	0.0456508	0.106474	0.285422	1.76814e-05	3	0.208167	0.05399	0.102348	0.313985	0.00011542	3	0.206479	0.053514	0.101594	0.311365	0.000114124
X-11858	Weighted median	4	0.203816	0.0550471	0.0959257	0.311707	0.000213423	3	0.22674	0.0676849	0.0940804	0.3594	0.000808292	3	0.225469	0.0671099	0.0939356	0.357002	0.000780293
X-11858	MR-Egger	4	-0.397929	0.681165	-1.73299	0.937131	0.559094	3	-0.546111	0.785421	-2.08551	0.993286	0.486861	3	-0.565568	0.812898	-2.15882	1.02768	0.48659
X-11858	MR-Egger intercept	4	0.0842975	0.0964702	-0.104781	0.273376	0.382217	3	0.104101	0.108142	-0.107855	0.316056	0.335735	3	0.10748	0.112921	-0.113842	0.328801	0.341193
X-11859	Inverse-variance weighted	4	0.0292581	0.0112892	0.00713164	0.0513845	0.00955068	3	0.0281191	0.0136269	0.00141088	0.0548274	0.0390651	3	0.0278862	0.0135088	0.00140936	0.054363	0.03899
X-11859	Weighted median	4	0.0294733	0.0130476	0.00390039	0.0550462	0.0238897	3	0.0303753	0.0157619	-0.000517495	0.061268	0.0539632	3	0.0300172	0.0156344	-0.000625548	0.06066	0.0548638
X-11859	MR-Egger	4	-0.0549043	0.167336	-0.382878	0.273069	0.742831	3	-0.0346372	0.196791	-0.42034	0.351065	0.860286	3	-0.0362039	0.203558	-0.43517	0.362762	0.858836
X-11859	MR-Egger intercept	4	0.0119467	0.0236989	-0.0345024	0.0583958	0.61419	3	0.00868717	0.0271758	-0.0445764	0.0619507	0.749221	3	0.00894758	0.028356	-0.0466291	0.0645242	0.752348
X-11876	Inverse-variance weighted	4	-0.0318472	0.0165719	-0.0643275	0.000633154	0.0546363	3	-0.0323656	0.0198291	-0.07123	0.00649876	0.102632	3	-0.032072	0.0196485	-0.0705823	0.00643832	0.102619
X-11876	Weighted median	4	-0.0303638	0.0189831	-0.06757	0.00684239	0.109706	3	-0.028156	0.023543	-0.0742995	0.0179875	0.231721	3	-0.027836	0.0233422	-0.0735858	0.0179139	0.233059
X-11876	MR-Egger	4	0.0342768	0.252797	-0.461197	0.52975	0.892145	3	0.0236812	0.295104	-0.554712	0.602075	0.936041	3	0.0268597	0.305733	-0.572366	0.626085	0.929993
X-11876	MR-Egger intercept	4	-0.00934734	0.0356588	-0.0792373	0.0605426	0.793219	3	-0.00768889	0.0403929	-0.0868575	0.0714798	0.849033	3	-0.00815742	0.0422325	-0.0909316	0.0746168	0.846838
1-arachidonoylglycerophosphocholine*	Inverse-variance weighted	4	0.0148261	0.011229	-0.00718238	0.0368345	0.186723	3	0.0148383	0.0130748	-0.0107878	0.0404644	0.256425	3	0.0147018	0.0129605	-0.0107004	0.0401039	0.256648
1-arachidonoylglycerophosphocholine*	Weighted median	4	0.0130482	0.0129787	-0.0123896	0.038486	0.314725	3	0.0158615	0.0149569	-0.0134535	0.0451766	0.288926	3	0.0156239	0.0148274	-0.0134373	0.0446852	0.292013
1-arachidonoylglycerophosphocholine*	MR-Egger	4	0.112417	0.173417	-0.227475	0.452308	0.516827	3	0.0911646	0.19839	-0.297672	0.480001	0.645859	3	0.0958536	0.204996	-0.305931	0.497638	0.640079
1-arachidonoylglycerophosphocholine*	MR-Egger intercept	4	-0.0138278	0.0245203	-0.0618866	0.034231	0.572799	3	-0.0105045	0.0272442	-0.0639022	0.0428932	0.699817	3	-0.0112651	0.0283996	-0.0669273	0.044397	0.691615
1-palmitoleoylglycerophosphocholine*	Inverse-variance weighted	4	-0.0268276	0.0123319	-0.0509977	-0.00265757	0.0295951	3	-0.0272245	0.0146276	-0.055894	0.00144511	0.06272	3	-0.0269858	0.0144998	-0.0554048	0.0014332	0.0627271
1-palmitoleoylglycerophosphocholine*	Weighted median	4	-0.0268409	0.0143338	-0.0549346	0.00125287	0.0611295	3	-0.024694	0.0169102	-0.0578373	0.00844932	0.144206	3	-0.0245234	0.0167792	-0.0574101	0.00836325	0.143869
1-palmitoleoylglycerophosphocholine*	MR-Egger	4	0.0510174	0.180202	-0.302171	0.404206	0.77709	3	-0.00521949	0.20817	-0.413226	0.402787	0.979997	3	-0.00425281	0.215525	-0.426674	0.418168	0.984257
1-palmitoleoylglycerophosphocholine*	MR-Egger intercept	4	-0.0110728	0.0255722	-0.0611933	0.0390477	0.665012	3	-0.0030474	0.0287576	-0.0594113	0.0533165	0.915607	3	-0.00317533	0.0300361	-0.062045	0.0556944	0.915807
X-11905	Inverse-variance weighted	4	0.0155923	0.0177066	-0.019112	0.0502965	0.37854	3	0.0123627	0.0213405	-0.0294639	0.0541894	0.562382	3	0.0122752	0.0211447	-0.0291676	0.0537181	0.561554
X-11905	Weighted median	4	0.0157093	0.0203429	-0.024162	0.0555806	0.43998	3	0.00960281	0.0254689	-0.0403153	0.059521	0.706143	3	0.00959485	0.0252108	-0.0398174	0.0590071	0.703511
X-11905	MR-Egger	4	-0.00259484	0.271171	-0.534081	0.528892	0.992365	3	-0.0467503	0.320903	-0.675708	0.582207	0.884171	3	-0.0448299	0.33251	-0.696537	0.606877	0.892752
X-11905	MR-Egger intercept	4	0.00256543	0.0381692	-0.0722449	0.0773758	0.946413	3	0.00809592	0.0438524	-0.0778532	0.0940451	0.853529	3	0.00789185	0.0458594	-0.0819909	0.0977746	0.863368
X-12007	Inverse-variance weighted	4	0.0298997	0.0332748	-0.0353178	0.0951172	0.368883	3	0.0288077	0.0396753	-0.0489544	0.10657	0.467785	3	0.0285649	0.0393211	-0.0485031	0.105633	0.467562
X-12007	Weighted median	4	0.0314603	0.0378354	-0.0426957	0.105616	0.405689	3	0.0282391	0.0459722	-0.0618647	0.118343	0.53904	3	0.0279119	0.0456193	-0.0615003	0.117324	0.540641
X-12007	MR-Egger	4	-0.0206729	0.497667	-0.996083	0.954737	0.966866	3	-0.0885006	0.579522	-1.22434	1.04734	0.878625	3	-0.0937384	0.600078	-1.26987	1.08239	0.875867
X-12007	MR-Egger intercept	4	0.00716479	0.0703484	-0.130716	0.145045	0.918878	3	0.016159	0.0796409	-0.139934	0.172252	0.839214	3	0.0169955	0.0832085	-0.14609	0.180081	0.838157
X-12013	Inverse-variance weighted	4	-0.0634666	0.0347827	-0.131639	0.00470619	0.0680521	3	-0.071022	0.041122	-0.15162	0.0095756	0.0841487	3	-0.0703677	0.0407566	-0.150249	0.00951381	0.0842514
X-12013	Weighted median	4	-0.0623518	0.0401037	-0.140954	0.01625	0.120002	3	-0.0698562	0.0481881	-0.164303	0.0245907	0.147154	3	-0.0693686	0.0477688	-0.162994	0.0242565	0.146453
X-12013	MR-Egger	4	-0.0413129	0.526865	-1.07395	0.991323	0.9375	3	-0.0782635	0.60854	-1.27098	1.11445	0.897667	3	-0.0758348	0.629764	-1.31015	1.15848	0.904152
X-12013	MR-Egger intercept	4	-0.00313905	0.0744908	-0.149138	0.14286	0.966387	3	0.000996856	0.0835799	-0.162817	0.16481	0.990484	3	0.000759197	0.0872703	-0.170287	0.171806	0.993059
gamma-glutamylmethionine*	Inverse-variance weighted	4	0.0284355	0.0142808	0.000445595	0.0564255	0.0464626	3	0.0221369	0.0169759	-0.0111353	0.0554091	0.192228	3	0.02198	0.0168286	-0.0110035	0.0549635	0.191516
gamma-glutamylmethionine*	Weighted median	4	0.0304743	0.0168543	-0.00255966	0.0635082	0.0705918	3	0.0245127	0.0198437	-0.0143802	0.0634056	0.216722	3	0.0244307	0.0196882	-0.0141574	0.0630189	0.214649
gamma-glutamylmethionine*	MR-Egger	4	-0.167374	0.208654	-0.576327	0.24158	0.422461	3	-0.147115	0.244405	-0.626139	0.331909	0.54722	3	-0.15191	0.252855	-0.647496	0.343677	0.547988
gamma-glutamylmethionine*	MR-Egger intercept	4	0.0277988	0.0295529	-0.0301238	0.0857215	0.346886	3	0.0234317	0.0337544	-0.0427257	0.0895892	0.487567	3	0.0242797	0.0352272	-0.0447643	0.0933238	0.490677
gamma-glutamylthreonine*	Inverse-variance weighted	4	0.00791402	0.0130525	-0.0176685	0.0334965	0.544302	3	0.00773809	0.0159879	-0.0235977	0.0390739	0.628389	3	0.00765063	0.0158492	-0.0234133	0.0387145	0.629299
gamma-glutamylthreonine*	Weighted median	4	0.00842072	0.0147759	-0.0205395	0.0373809	0.568748	3	0.0114809	0.0182921	-0.024371	0.0473328	0.530239	3	0.0113792	0.0181499	-0.024194	0.0469523	0.530689
gamma-glutamylthreonine*	MR-Egger	4	0.0342925	0.195743	-0.349358	0.417943	0.86093	3	0.0775478	0.231941	-0.377049	0.532145	0.738121	3	0.0787016	0.239895	-0.391484	0.548887	0.742861
gamma-glutamylthreonine*	MR-Egger intercept	4	-0.00374114	0.0276997	-0.0580315	0.0505492	0.892564	3	-0.00965718	0.0320095	-0.0723946	0.0530802	0.762883	3	-0.00991299	0.0333969	-0.0753696	0.0555436	0.766601
X-12029	Inverse-variance weighted	4	-0.0309205	0.00598977	-0.0426603	-0.0191808	2.44042e-07	3	-0.0325099	0.00710483	-0.0464351	-0.0185846	4.74542e-06	3	-0.0322264	0.00704274	-0.0460299	-0.0184229	4.74321e-06
X-12029	Weighted median	4	-0.0312282	0.00736608	-0.0456655	-0.016791	2.24051e-05	3	-0.0347951	0.0087514	-0.0519475	-0.0176427	7.00997e-05	3	-0.0346373	0.00867539	-0.0516407	-0.0176338	6.53556e-05
X-12029	MR-Egger	4	-0.0348205	0.0875265	-0.206369	0.136728	0.690757	3	-0.0519597	0.101111	-0.250134	0.146215	0.607332	3	-0.0548784	0.104683	-0.260054	0.150297	0.600118
X-12029	MR-Egger intercept	4	0.000554735	0.0124208	-0.0237895	0.024899	0.964377	3	0.00269355	0.013968	-0.0246832	0.0300703	0.847087	3	0.003164	0.014589	-0.0254299	0.0317579	0.828305
X-12038	Inverse-variance weighted	4	-0.00327592	0.0071104	-0.0172121	0.0106602	0.644997	3	-0.00761309	0.00940114	-0.026039	0.0108128	0.418052	3	-0.00751755	0.009319	-0.0257825	0.0107474	0.419845
X-12038	Weighted median	4	0.00142775	0.00843306	-0.0151007	0.0179563	0.865557	3	0.000965805	0.0112148	-0.0210148	0.0229464	0.931372	3	0.000956284	0.0111182	-0.020835	0.0227476	0.931458
X-12038	MR-Egger	4	-0.155943	0.115598	-0.382511	0.070625	0.177334	3	-0.218873	0.149953	-0.512777	0.0750297	0.144397	3	-0.226921	0.154768	-0.53026	0.0764178	0.142592
X-12038	MR-Egger intercept	4	0.0213987	0.0161722	-0.0102983	0.0530956	0.185777	3	0.0289597	0.0205153	-0.0112495	0.069169	0.158063	3	0.0303365	0.0213606	-0.0115295	0.0722024	0.155547
X-12039	Inverse-variance weighted	4	0.0222768	0.0278718	-0.0323509	0.0769045	0.424139	3	0.0193534	0.0330987	-0.0455189	0.0842257	0.558738	3	0.0192444	0.0328051	-0.0450525	0.0835413	0.557454
X-12039	Weighted median	4	0.0315088	0.0323794	-0.0319537	0.0949714	0.330497	3	0.0276198	0.0394658	-0.0497317	0.104971	0.484026	3	0.0274255	0.0391799	-0.0493658	0.104217	0.483935
X-12039	MR-Egger	4	-0.278422	0.414588	-1.091	0.534156	0.501862	3	-0.372904	0.478996	-1.31172	0.565911	0.436268	3	-0.390019	0.49597	-1.3621	0.582065	0.431648
X-12039	MR-Egger intercept	4	0.0426766	0.0587072	-0.0723875	0.157741	0.467263	3	0.0541238	0.0659341	-0.0751046	0.183352	0.411716	3	0.0569642	0.0688816	-0.0780412	0.19197	0.408244
X-12040	Inverse-variance weighted	4	-0.123008	0.0524248	-0.225759	-0.0202574	0.0189571	3	-0.119896	0.0626052	-0.2426	0.00280818	0.0554787	3	-0.11882	0.0620431	-0.240423	0.00278187	0.0554764
X-12040	Weighted median	4	-0.118584	0.0602096	-0.236593	-0.00057543	0.0488933	3	-0.116974	0.0731895	-0.260423	0.0264748	0.109991	3	-0.115452	0.0726215	-0.257787	0.0268839	0.111886
X-12040	MR-Egger	4	-0.138853	0.786786	-1.68092	1.40322	0.859916	3	-0.0795174	0.916592	-1.876	1.71697	0.930868	3	-0.0808389	0.949304	-1.94144	1.77976	0.932137
X-12040	MR-Egger intercept	4	0.00224372	0.111168	-0.215641	0.220128	0.983897	3	-0.00555693	0.125848	-0.252215	0.241101	0.96478	3	-0.00527339	0.131521	-0.263049	0.252502	0.968017
X-12056	Inverse-variance weighted	4	0.0407196	0.0272758	-0.01274	0.0941792	0.135467	3	0.0440307	0.0325553	-0.0197766	0.107838	0.176219	3	0.0436441	0.0322644	-0.0195929	0.106881	0.176151
X-12056	Weighted median	4	0.0370703	0.0310702	-0.0238261	0.0979668	0.232824	3	0.0400328	0.0379432	-0.0343345	0.1144	0.291393	3	0.0395346	0.0376549	-0.0342677	0.113337	0.293756
X-12056	MR-Egger	4	0.0104019	0.407556	-0.788393	0.809197	0.979638	3	-0.046888	0.474954	-0.977782	0.884006	0.92136	3	-0.0511527	0.491843	-1.01515	0.912841	0.917168
X-12056	MR-Egger intercept	4	0.00429501	0.0576076	-0.108614	0.117204	0.940568	3	0.0125236	0.0652689	-0.115401	0.140448	0.847838	3	0.013173	0.0681992	-0.120495	0.146841	0.846838
X-12063	Inverse-variance weighted	4	-0.0357731	0.0194187	-0.0738331	0.00228694	0.0654468	3	-0.0290789	0.0228022	-0.0737703	0.0156126	0.202215	3	-0.0288206	0.0226039	-0.0731235	0.0154822	0.202299
X-12063	Weighted median	4	-0.0358613	0.0224207	-0.0798051	0.00808241	0.109715	3	-0.030393	0.0260955	-0.0815394	0.0207533	0.244147	3	-0.029983	0.0258876	-0.0807217	0.0207557	0.246783
X-12063	MR-Egger	4	0.0178431	0.289363	-0.549297	0.584983	0.950831	3	-0.0800738	0.332015	-0.730812	0.570664	0.809419	3	-0.0838992	0.343394	-0.756939	0.589141	0.80698
X-12063	MR-Egger intercept	4	-0.00761984	0.041031	-0.0880392	0.0727995	0.852673	3	0.00704974	0.0457907	-0.0826984	0.0967979	0.877645	3	0.00767959	0.0477755	-0.0859587	0.101318	0.872296
gamma-tocopherol	Inverse-variance weighted	4	0.019788	0.0191496	-0.0177444	0.0573205	0.301444	3	0.0240539	0.0227729	-0.0205801	0.0686878	0.290853	3	0.0238707	0.0225664	-0.0203586	0.0681001	0.290147
gamma-tocopherol	Weighted median	4	0.0178806	0.0221616	-0.0255553	0.0613165	0.419764	3	0.0278294	0.0278417	-0.0267392	0.0823981	0.317523	3	0.0275506	0.0276266	-0.0265966	0.0816977	0.318644
gamma-tocopherol	MR-Egger	4	-0.140221	0.289028	-0.706705	0.426262	0.627571	3	-0.225467	0.336679	-0.885346	0.434411	0.503062	3	-0.236991	0.348772	-0.920572	0.44659	0.496821
gamma-tocopherol	MR-Egger intercept	4	0.0226321	0.0407909	-0.0573166	0.102581	0.579009	3	0.0342703	0.046135	-0.0561526	0.124693	0.457587	3	0.0361485	0.0482293	-0.0583792	0.130676	0.453548
gamma-glutamylphenylalanine	Inverse-variance weighted	4	-0.0160367	0.00625343	-0.0282932	-0.00378023	0.0103334	3	-0.0173481	0.00738573	-0.0318238	-0.0028723	0.0188309	3	-0.0171846	0.00732119	-0.0315339	-0.00283536	0.0189128
gamma-glutamylphenylalanine	Weighted median	4	-0.0136101	0.00734659	-0.0280091	0.00078896	0.0639436	3	-0.0146597	0.00869211	-0.0316959	0.00237654	0.0916898	3	-0.0144433	0.00862746	-0.0313528	0.00246624	0.09411
gamma-glutamylphenylalanine	MR-Egger	4	-0.0650843	0.0924737	-0.246329	0.116161	0.481549	3	-0.0817062	0.106566	-0.290573	0.12716	0.44325	3	-0.084826	0.110278	-0.300967	0.131315	0.441775
gamma-glutamylphenylalanine	MR-Egger intercept	4	0.00697043	0.0131119	-0.0187284	0.0326693	0.594995	3	0.00889966	0.0147009	-0.0199136	0.037713	0.544926	3	0.00943426	0.0153471	-0.0206455	0.039514	0.538736
isobutyrylcarnitine	Inverse-variance weighted	4	-0.0188852	0.0149582	-0.0482027	0.0104323	0.206757	3	-0.0211724	0.0176716	-0.0558081	0.0134633	0.230878	3	-0.0209785	0.0175183	-0.0553137	0.0133567	0.231103
isobutyrylcarnitine	Weighted median	4	-0.0170928	0.0171632	-0.050732	0.0165465	0.3193	3	-0.0219304	0.0202207	-0.0615623	0.0177015	0.278121	3	-0.0216392	0.0200671	-0.06097	0.0176916	0.280882
isobutyrylcarnitine	MR-Egger	4	-0.083838	0.218392	-0.511878	0.344202	0.701062	3	-0.0960125	0.251412	-0.58877	0.396745	0.70254	3	-0.100588	0.260218	-0.610605	0.40943	0.699088
isobutyrylcarnitine	MR-Egger intercept	4	0.00924718	0.0310189	-0.0515488	0.0700432	0.765616	3	0.0103747	0.0347657	-0.0577648	0.0785142	0.765384	3	0.0111301	0.0362984	-0.0600135	0.0822737	0.759126
pseudouridine	Inverse-variance weighted	4	-0.0179034	0.0057925	-0.0292565	-0.00655028	0.00199629	3	-0.0176334	0.00680075	-0.0309626	-0.00430418	0.0095181	3	-0.0174893	0.00674238	-0.0307041	-0.00427446	0.00948848
pseudouridine	Weighted median	4	-0.0190145	0.00678162	-0.0323062	-0.00572277	0.00504998	3	-0.0185354	0.00783524	-0.0338921	-0.00317856	0.017999	3	-0.0184147	0.00777115	-0.0336459	-0.0031835	0.0178064
pseudouridine	MR-Egger	4	0.0179229	0.0844863	-0.147667	0.183513	0.831998	3	0.0192754	0.0967439	-0.170339	0.20889	0.842074	3	0.0200012	0.100086	-0.176164	0.216166	0.841606
pseudouridine	MR-Egger intercept	4	-0.00510756	0.0120164	-0.0286593	0.0184442	0.670802	3	-0.00512431	0.0133984	-0.0313847	0.0211361	0.702123	3	-0.00524906	0.0139813	-0.0326518	0.0221537	0.707337
valerate	Inverse-variance weighted	4	0.018945	0.0120032	-0.00458086	0.042471	0.11449	3	0.0176046	0.0143931	-0.0106053	0.0458145	0.22128	3	0.0174793	0.014263	-0.0104757	0.0454344	0.220387
valerate	Weighted median	4	0.0187426	0.0138512	-0.00840514	0.0458904	0.176009	3	0.0125642	0.0175434	-0.0218202	0.0469487	0.47388	3	0.0124918	0.0174119	-0.0216348	0.0466185	0.473108
valerate	MR-Egger	4	-0.0781361	0.180753	-0.432405	0.276133	0.665537	3	-0.107377	0.211908	-0.522709	0.307955	0.612356	3	-0.109096	0.219506	-0.539321	0.321129	0.619186
valerate	MR-Egger intercept	4	0.0137302	0.0255075	-0.0362635	0.0637239	0.590382	3	0.0171784	0.029059	-0.0397762	0.0741329	0.554416	3	0.0175526	0.0303754	-0.0419821	0.0770873	0.563361
palmitoleate (16:1n7)	Inverse-variance weighted	4	-0.0238663	0.0141644	-0.0516279	0.00389539	0.0919981	3	-0.0279048	0.0167173	-0.06067	0.00486042	0.0950736	3	-0.0276289	0.0165712	-0.0601078	0.00484992	0.0954564
palmitoleate (16:1n7)	Weighted median	4	-0.02443	0.0164683	-0.0567073	0.00784722	0.137952	3	-0.0323011	0.0196104	-0.0707367	0.00613453	0.0995285	3	-0.0320037	0.0194703	-0.0701648	0.00615729	0.100233
palmitoleate (16:1n7)	MR-Egger	4	-0.119335	0.208049	-0.527105	0.288434	0.566244	3	-0.143008	0.237909	-0.609302	0.323285	0.54777	3	-0.146348	0.246314	-0.629114	0.336419	0.552411
palmitoleate (16:1n7)	MR-Egger intercept	4	0.0135936	0.029555	-0.0443331	0.0715204	0.645556	3	0.0159404	0.0328659	-0.0484756	0.0803563	0.627667	3	0.0165825	0.034327	-0.0506971	0.0838622	0.629042
alpha-ketoglutarate	Inverse-variance weighted	4	-0.0117572	0.0149582	-0.0410746	0.0175603	0.431866	3	-0.0108796	0.0176716	-0.0455153	0.0237561	0.538123	3	-0.0107974	0.0175183	-0.0451325	0.0235378	0.537664
alpha-ketoglutarate	Weighted median	4	-0.00967362	0.0171036	-0.043196	0.0238487	0.571672	3	-0.00966931	0.0201072	-0.0490788	0.0297402	0.630597	3	-0.00963506	0.0199486	-0.0487336	0.0294635	0.6291
alpha-ketoglutarate	MR-Egger	4	0.0528253	0.218392	-0.375215	0.480866	0.808871	3	0.0147569	0.251412	-0.478001	0.507515	0.953194	3	0.0137502	0.260218	-0.496267	0.523768	0.957859
alpha-ketoglutarate	MR-Egger intercept	4	-0.00919445	0.0310189	-0.0699904	0.0516015	0.766914	3	-0.00355386	0.0347657	-0.0716934	0.0645857	0.91858	3	-0.00343199	0.0362984	-0.0745756	0.0677116	0.924673
erythronate*	Inverse-variance weighted	4	-0.020481	0.00680698	-0.0338224	-0.00713954	0.00262265	3	-0.0227555	0.00828231	-0.0389885	-0.00652247	0.00600549	3	-0.0225443	0.0082041	-0.038624	-0.00646455	0.00599729
erythronate*	Weighted median	4	-0.0208788	0.00807282	-0.0367012	-0.00505632	0.00970118	3	-0.0272872	0.00995598	-0.0468005	-0.0077738	0.00612933	3	-0.025629	0.00985361	-0.0449417	-0.00631629	0.00929588
erythronate*	MR-Egger	4	-0.0403905	0.108124	-0.252309	0.171528	0.708733	3	-0.0501921	0.13095	-0.30685	0.206466	0.701504	3	-0.0544129	0.135784	-0.320545	0.211719	0.688618
erythronate*	MR-Egger intercept	4	0.00279488	0.0151482	-0.026895	0.0324848	0.853619	3	0.00373241	0.0177785	-0.0311128	0.0385777	0.833715	3	0.0043759	0.0186105	-0.0321001	0.0408519	0.814108
lathosterol	Inverse-variance weighted	4	-0.0314449	0.0177011	-0.0661383	0.00324859	0.0756606	3	-0.0312693	0.0206864	-0.0718138	0.00927528	0.130639	3	-0.0309317	0.0205056	-0.0711219	0.00925856	0.131439
lathosterol	Weighted median	4	-0.0228193	0.0210348	-0.0640467	0.0184082	0.277995	3	-0.0215367	0.0254542	-0.0714259	0.0283526	0.397499	3	-0.0210795	0.0252308	-0.0705309	0.0283719	0.403455
lathosterol	MR-Egger	4	-0.300999	0.26818	-0.826623	0.224625	0.261703	3	-0.387793	0.305634	-0.986825	0.211239	0.204507	3	-0.401737	0.316044	-1.02117	0.217698	0.203678
lathosterol	MR-Egger intercept	4	0.0382797	0.0380016	-0.036202	0.112761	0.313781	3	0.0491855	0.0420681	-0.0332665	0.131637	0.242328	3	0.051597	0.0438844	-0.0344148	0.137609	0.239695
X-12092	Inverse-variance weighted	4	-0.0623815	0.0185353	-0.09871	-0.0260529	0.000763924	3	-0.0614923	0.0229543	-0.106482	-0.0165027	0.00738636	3	-0.0609944	0.0227537	-0.105591	-0.016398	0.00734814
X-12092	Weighted median	4	-0.0688498	0.0218451	-0.111665	-0.0260342	0.00162307	3	-0.0706654	0.0274808	-0.124527	-0.016804	0.0101274	3	-0.0698546	0.0272469	-0.123257	-0.0164517	0.0103544
X-12092	MR-Egger	4	0.120976	0.278865	-0.425589	0.667541	0.664421	3	0.180165	0.335958	-0.478301	0.838631	0.59177	3	0.187996	0.3475	-0.493091	0.869083	0.58851
X-12092	MR-Egger intercept	4	-0.0259363	0.0393587	-0.103078	0.0512053	0.509914	3	-0.033369	0.0462821	-0.12408	0.0573421	0.470914	3	-0.0346781	0.0482941	-0.129333	0.0599766	0.47272
X-12093	Inverse-variance weighted	4	0.0428097	0.024009	-0.00424704	0.0898664	0.0745749	3	0.0438762	0.0286413	-0.0122598	0.100012	0.125542	3	0.0434529	0.0283857	-0.012182	0.0990878	0.125818
X-12093	Weighted median	4	0.0400835	0.0274071	-0.0136335	0.0938005	0.143598	3	0.0375166	0.0335828	-0.0283046	0.103338	0.263937	3	0.0369472	0.0333332	-0.0283847	0.102279	0.26768
X-12093	MR-Egger	4	0.14277	0.358492	-0.559861	0.845401	0.690445	3	0.227861	0.417521	-0.590465	1.04619	0.585239	3	0.237232	0.432353	-0.610165	1.08463	0.583212
X-12093	MR-Egger intercept	4	-0.0141635	0.050681	-0.113496	0.0851695	0.779889	3	-0.0253486	0.0573887	-0.137828	0.0871311	0.658706	3	-0.0269331	0.0599625	-0.144457	0.0905913	0.653313
X-12094	Inverse-variance weighted	4	-0.0607497	0.0134752	-0.0871606	-0.0343387	6.53666e-06	3	-0.0570784	0.0162267	-0.0888821	-0.0252747	0.00043552	3	-0.0566206	0.0160849	-0.0881463	-0.0250948	0.000431359
X-12094	Weighted median	4	-0.0544695	0.0166239	-0.0870517	-0.0218873	0.00105073	3	-0.0486817	0.0197852	-0.0874599	-0.00990351	0.0138737	3	-0.0482845	0.0195987	-0.0866972	-0.00987174	0.0137527
X-12094	MR-Egger	4	0.124068	0.199317	-0.266587	0.514723	0.533638	3	0.0828318	0.240704	-0.38894	0.554604	0.730754	3	0.0820388	0.248874	-0.405744	0.569822	0.741672
X-12094	MR-Egger intercept	4	-0.026083	0.0280651	-0.0810896	0.0289235	0.352693	3	-0.0192945	0.0331192	-0.0842069	0.0456178	0.560177	3	-0.019287	0.034545	-0.086994	0.04842	0.576629
X-12095	Inverse-variance weighted	4	-0.0624309	0.0116272	-0.0852198	-0.039642	7.90083e-08	3	-0.0621807	0.0137917	-0.089212	-0.0351494	6.52727e-06	3	-0.061687	0.0136712	-0.0884821	-0.034892	6.41625e-06
X-12095	Weighted median	4	-0.0595392	0.0146786	-0.0883088	-0.0307696	4.98814e-05	3	-0.0575551	0.0174909	-0.0918366	-0.0232736	0.00099982	3	-0.0571579	0.0173388	-0.0911414	-0.0231745	0.000978869
X-12095	MR-Egger	4	0.142171	0.169904	-0.190836	0.475177	0.402723	3	0.129832	0.196275	-0.25486	0.514524	0.508305	3	0.132247	0.203209	-0.266036	0.530529	0.515181
X-12095	MR-Egger intercept	4	-0.0291029	0.0241109	-0.0763594	0.0181535	0.227415	3	-0.0265913	0.0271143	-0.0797344	0.0265519	0.326737	3	-0.0270885	0.0283198	-0.0825942	0.0284172	0.338808
X-12100	Inverse-variance weighted	4	0.00677181	0.00887805	-0.0106289	0.0241725	0.445607	3	0.00659566	0.0104483	-0.0138826	0.0270739	0.527866	3	0.00651773	0.010357	-0.0137816	0.026817	0.529147
X-12100	Weighted median	4	0.00848832	0.0101532	-0.0114116	0.0283883	0.403142	3	0.0106107	0.0121655	-0.0132333	0.0344546	0.383103	3	0.0105471	0.0120758	-0.0131211	0.0342152	0.382442
X-12100	MR-Egger	4	0.060648	0.130808	-0.195731	0.317027	0.642904	3	0.0683648	0.148693	-0.223068	0.359798	0.645681	3	0.0691628	0.153946	-0.232566	0.370892	0.65324
X-12100	MR-Egger intercept	4	-0.00767585	0.0185935	-0.0441184	0.0287667	0.679735	3	-0.00855422	0.0205412	-0.0488142	0.0317057	0.677086	3	-0.00875022	0.0214544	-0.0508	0.0332996	0.683382
X-12116	Inverse-variance weighted	4	0.0590179	0.0223312	0.0152495	0.102786	0.00822138	3	0.054434	0.0275167	0.000502157	0.108366	0.0479047	3	0.0539654	0.0272773	0.00050299	0.107428	0.0478832
X-12116	Weighted median	4	0.0625301	0.0259363	0.011696	0.113364	0.0159125	3	0.0464077	0.0321237	-0.0165535	0.109369	0.148554	3	0.0458138	0.0318558	-0.0166225	0.10825	0.150389
X-12116	MR-Egger	4	-0.0241669	0.335419	-0.681575	0.633241	0.942562	3	-0.0525204	0.402323	-0.84106	0.736019	0.896137	3	-0.0578609	0.416075	-0.873352	0.75763	0.8894
X-12116	MR-Egger intercept	4	0.0117747	0.0473725	-0.0810738	0.104623	0.803705	3	0.0147779	0.0554589	-0.0939195	0.123475	0.789881	3	0.0155837	0.057858	-0.0978158	0.128983	0.787664
eicosenoate (20:1n9 or 11)	Inverse-variance weighted	4	0.0299799	0.0143848	0.0017862	0.0581737	0.0371477	3	0.0312772	0.017182	-0.00239883	0.0649532	0.0687056	3	0.0310434	0.0170276	-0.00233013	0.0644169	0.0682853
eicosenoate (20:1n9 or 11)	Weighted median	4	0.0362673	0.0167963	0.0033471	0.0691875	0.0308316	3	0.0400119	0.021223	-0.00158446	0.0816082	0.0593885	3	0.0399109	0.0210642	-0.00137418	0.0811959	0.0581287
eicosenoate (20:1n9 or 11)	MR-Egger	4	-0.135869	0.216688	-0.560569	0.288831	0.530642	3	-0.219563	0.253109	-0.715647	0.276521	0.385687	3	-0.227893	0.262108	-0.741615	0.28583	0.384595
eicosenoate (20:1n9 or 11)	MR-Egger intercept	4	0.0234694	0.030596	-0.0364976	0.0834364	0.443038	3	0.0344995	0.0347312	-0.0335724	0.102571	0.32055	3	0.0359288	0.0362921	-0.0352024	0.10706	0.322179
X-12188	Inverse-variance weighted	4	0.11333	0.0382604	0.0383411	0.188319	0.00305577	3	0.109192	0.0454097	0.0201907	0.198194	0.0161903	3	0.10829	0.0450139	0.0200641	0.196515	0.0161417
X-12188	Weighted median	4	0.11975	0.0452383	0.0310848	0.208416	0.00811855	3	0.101227	0.0546855	-0.00595468	0.208409	0.0641589	3	0.100074	0.0542748	-0.0063027	0.206451	0.0652067
X-12188	MR-Egger	4	-0.276463	0.561213	-1.37642	0.823495	0.622283	3	-0.317528	0.653349	-1.59807	0.963013	0.626967	3	-0.336818	0.676089	-1.66193	0.988292	0.618353
X-12188	MR-Egger intercept	4	0.0553606	0.0795212	-0.100498	0.211219	0.48632	3	0.0590463	0.090187	-0.117717	0.23581	0.512654	3	0.0621199	0.0941466	-0.122404	0.246644	0.509369
X-12189	Inverse-variance weighted	4	-0.0117034	0.0401454	-0.0903869	0.0669802	0.770651	3	0.00511368	0.0480663	-0.0890945	0.0993219	0.915274	3	0.00509809	0.0476314	-0.0882576	0.0984538	0.914763
X-12189	Weighted median	4	-0.0158216	0.0453405	-0.104687	0.0730441	0.727126	3	0.00468422	0.056629	-0.106307	0.115675	0.934076	3	0.00474565	0.0562043	-0.105413	0.114904	0.93271
X-12189	MR-Egger	4	0.121057	0.606517	-1.0677	1.30981	0.841798	3	-0.0405599	0.709001	-1.43018	1.34906	0.95438	3	-0.0368722	0.734444	-1.47636	1.40261	0.95996
X-12189	MR-Egger intercept	4	-0.0187787	0.0856025	-0.186557	0.148999	0.826361	3	0.00627557	0.097193	-0.184219	0.19677	0.948518	3	0.00581826	0.1016	-0.193314	0.204951	0.954333
X-12206	Inverse-variance weighted	4	0.0197942	0.0129589	-0.00560468	0.0451932	0.126645	3	0.0224756	0.0156082	-0.00811586	0.0530671	0.14987	3	0.0222825	0.0154718	-0.00804165	0.0526066	0.14981
X-12206	Weighted median	4	0.0207542	0.0147838	-0.00822156	0.04973	0.160365	3	0.0222643	0.0179083	-0.0128352	0.0573639	0.213778	3	0.0219906	0.0177651	-0.0128283	0.0568095	0.21577
X-12206	MR-Egger	4	-0.0108664	0.193011	-0.389162	0.367429	0.955103	3	-0.00412298	0.22503	-0.445174	0.436928	0.985382	3	-0.00471818	0.232874	-0.461144	0.451707	0.983835
X-12206	MR-Egger intercept	4	0.00435407	0.0273474	-0.0492458	0.057954	0.873501	3	0.00367844	0.0310455	-0.0571697	0.0645266	0.905683	3	0.00376622	0.032411	-0.0597581	0.0672906	0.907493
X-12212	Inverse-variance weighted	4	0.0398007	0.0248948	-0.00899219	0.0885936	0.109875	3	0.0435863	0.0297662	-0.0147544	0.101927	0.143115	3	0.0432637	0.0294996	-0.0145545	0.101082	0.142489
X-12212	Weighted median	4	0.042889	0.0285384	-0.0130452	0.0988233	0.132877	3	0.0404919	0.0358242	-0.0297222	0.110706	0.258351	3	0.0403018	0.0355516	-0.029378	0.109982	0.256956
X-12212	MR-Egger	4	-0.139109	0.37165	-0.867529	0.58931	0.708179	3	-0.23699	0.433753	-1.08713	0.61315	0.584811	3	-0.242845	0.449239	-1.12334	0.637646	0.588803
X-12212	MR-Egger intercept	4	0.0253411	0.0525227	-0.0776016	0.128284	0.629466	3	0.0386415	0.0595964	-0.0781653	0.155448	0.516735	3	0.0397517	0.062282	-0.0823188	0.161822	0.523309
X-12216	Inverse-variance weighted	4	-0.0241619	0.0170965	-0.0576704	0.00934658	0.157577	3	-0.0264199	0.0206864	-0.0669645	0.0141246	0.201544	3	-0.0262023	0.0205056	-0.0663925	0.013988	0.201316
X-12216	Weighted median	4	-0.0207571	0.0196009	-0.0591741	0.0176599	0.289605	3	-0.022132	0.0243175	-0.0697933	0.0255294	0.362756	3	-0.021928	0.0240989	-0.069161	0.0253049	0.362866
X-12216	MR-Egger	4	0.0427715	0.251408	-0.449979	0.535522	0.86491	3	0.121046	0.305634	-0.477986	0.720078	0.69207	3	0.12862	0.316044	-0.490814	0.748055	0.68403
X-12216	MR-Egger intercept	4	-0.00944189	0.0353825	-0.0787903	0.0599065	0.789583	3	-0.0203441	0.0420681	-0.102796	0.0621079	0.62867	3	-0.0215434	0.0438844	-0.107555	0.0644685	0.623489
X-12217	Inverse-variance weighted	4	0.0178123	0.0168308	-0.0151755	0.0508001	0.289911	3	0.0164427	0.0202653	-0.0232766	0.056162	0.417153	3	0.016328	0.0200882	-0.0230443	0.0557002	0.416326
X-12217	Weighted median	4	0.02229	0.0193944	-0.0157223	0.0603023	0.250431	3	0.0211765	0.0238398	-0.0255486	0.0679015	0.374389	3	0.0209402	0.0236209	-0.0253559	0.0672363	0.375341
X-12217	MR-Egger	4	-0.173433	0.248475	-0.660435	0.313569	0.485183	3	-0.186452	0.29968	-0.773813	0.40091	0.53383	3	-0.194981	0.309878	-0.802332	0.412369	0.529206
X-12217	MR-Egger intercept	4	0.0269998	0.0349989	-0.0415967	0.0955963	0.440441	3	0.0279886	0.0412452	-0.0528505	0.108828	0.497397	3	0.0294009	0.0430248	-0.0549262	0.113728	0.494388
X-12230	Inverse-variance weighted	4	0.00987189	0.02268	-0.0345801	0.0543238	0.663367	3	0.00601493	0.0271484	-0.047195	0.0592248	0.824658	3	0.00594157	0.0269112	-0.0468033	0.0586865	0.82526
X-12230	Weighted median	4	0.0117959	0.0256542	-0.0384853	0.0620772	0.645656	3	0.00288673	0.0310276	-0.0579262	0.0636997	0.925874	3	0.00277175	0.0307853	-0.0575663	0.0631098	0.92826
X-12230	MR-Egger	4	0.0433471	0.333182	-0.609678	0.696372	0.896487	3	0.116759	0.395469	-0.658347	0.891864	0.767809	3	0.121011	0.409116	-0.680842	0.922864	0.767394
X-12230	MR-Egger intercept	4	-0.00473931	0.0470614	-0.096978	0.0874994	0.919785	3	-0.0152992	0.0545048	-0.122127	0.0915282	0.778945	3	-0.0160337	0.0568827	-0.127522	0.0954544	0.778041
X-12231	Inverse-variance weighted	4	-0.0266792	0.020478	-0.0668155	0.013457	0.192635	3	-0.0267938	0.0244509	-0.0747167	0.021129	0.273157	3	-0.0265056	0.0242319	-0.0739993	0.0209881	0.274029
X-12231	Weighted median	4	-0.0261553	0.0236005	-0.0724115	0.0201008	0.267753	3	-0.0189085	0.029111	-0.0759649	0.0381479	0.515994	3	-0.0185153	0.0289075	-0.075173	0.0381423	0.521846
X-12231	MR-Egger	4	-0.263445	0.306972	-0.865099	0.338209	0.390779	3	-0.275161	0.358084	-0.976993	0.42667	0.442233	3	-0.285279	0.370818	-1.01207	0.44151	0.4417
X-12231	MR-Egger intercept	4	0.0335265	0.043371	-0.0514791	0.118532	0.439513	3	0.03419	0.0491784	-0.0621979	0.130578	0.486915	3	0.0359374	0.0513875	-0.0647802	0.136655	0.484339
X-12236	Inverse-variance weighted	4	-0.0202167	0.0288905	-0.0768411	0.0364077	0.484072	3	-0.0255103	0.0341664	-0.0924751	0.0414545	0.455275	3	-0.0252183	0.0338627	-0.091588	0.0411515	0.456441
X-12236	Weighted median	4	-0.0200262	0.0332906	-0.0852747	0.0452223	0.54747	3	-0.0237976	0.0403697	-0.102921	0.0553256	0.555532	3	-0.0233986	0.0400455	-0.101886	0.0550891	0.559018
X-12236	MR-Egger	4	-0.359034	0.436965	-1.21547	0.497402	0.411274	3	-0.328203	0.504457	-1.31692	0.660516	0.515301	3	-0.338082	0.522088	-1.36135	0.685192	0.517271
X-12236	MR-Egger intercept	4	0.0480177	0.0617918	-0.0730921	0.169127	0.437107	3	0.0416762	0.0692967	-0.0941429	0.177495	0.547562	3	0.0434545	0.0723616	-0.0983717	0.185281	0.548161
X-12244	Inverse-variance weighted	4	-0.00850848	0.00845615	-0.0250822	0.00806527	0.314325	3	-0.0122205	0.0100304	-0.0318796	0.00743865	0.223091	3	-0.012113	0.00994269	-0.0316003	0.00737431	0.223117
X-12244	Weighted median	4	-0.00647041	0.00971248	-0.0255065	0.0125657	0.505286	3	-0.0147885	0.0115543	-0.0374346	0.00785756	0.200576	3	-0.0146055	0.0114651	-0.0370767	0.00786571	0.202696
X-12244	MR-Egger	4	-0.0529372	0.123567	-0.295124	0.189249	0.668353	3	-0.0376027	0.142745	-0.317379	0.242173	0.792223	3	-0.0399684	0.147788	-0.329628	0.249692	0.786819
X-12244	MR-Egger intercept	4	0.00631963	0.0175352	-0.0280487	0.040688	0.71855	3	0.00351511	0.0197195	-0.0351345	0.0421647	0.858523	3	0.00389082	0.0205962	-0.036477	0.0442586	0.850164
X-12253	Inverse-variance weighted	4	0.0297771	0.0223312	-0.0139913	0.0735456	0.182391	3	0.0388524	0.026687	-0.0134531	0.0911579	0.145432	3	0.0384518	0.0264474	-0.0133842	0.0902877	0.145975
X-12253	Weighted median	4	0.0248815	0.0259186	-0.025918	0.075681	0.337062	3	0.0256679	0.0321012	-0.0372494	0.0885852	0.423947	3	0.0251904	0.0318815	-0.0372961	0.0876769	0.429454
X-12253	MR-Egger	4	0.35978	0.335419	-0.297629	1.01719	0.283438	3	0.326135	0.391748	-0.441678	1.09395	0.405121	3	0.33904	0.4057	-0.456117	1.1342	0.403329
X-12253	MR-Egger intercept	4	-0.0467112	0.0473725	-0.13956	0.0461372	0.324113	3	-0.0395273	0.0537756	-0.144925	0.0658709	0.462314	3	-0.0417245	0.0561952	-0.151865	0.0684161	0.457789
X-12261	Inverse-variance weighted	4	0.0309025	0.0379777	-0.0435324	0.105337	0.415816	3	0.021419	0.0449185	-0.0666196	0.109458	0.633474	3	0.0212323	0.0445208	-0.0660269	0.108491	0.633428
X-12261	Weighted median	4	0.0309932	0.0433246	-0.0539215	0.115908	0.47438	3	0.0260503	0.0518799	-0.0756323	0.127733	0.615578	3	0.0259743	0.0514757	-0.0749161	0.126865	0.613844
X-12261	MR-Egger	4	0.0367316	0.570654	-1.08173	1.15519	0.948678	3	0.066705	0.658547	-1.22402	1.35743	0.919319	3	0.0718168	0.681568	-1.26403	1.40766	0.916082
X-12261	MR-Egger intercept	4	-0.000826687	0.0807517	-0.159097	0.157444	0.991832	3	-0.00624217	0.0905621	-0.183741	0.171256	0.945048	3	-0.00703344	0.094565	-0.192377	0.178311	0.940711
X-12329	Inverse-variance weighted	4	0.0409091	0.0526936	-0.0623684	0.144187	0.437537	3	0.0449154	0.0643277	-0.0811646	0.170995	0.485035	3	0.0445942	0.0637573	-0.0803679	0.169556	0.484279
X-12329	Weighted median	4	0.0510386	0.0600181	-0.0665946	0.168672	0.395109	3	0.0430117	0.0765763	-0.107075	0.193099	0.574331	3	0.0429772	0.0759943	-0.105969	0.191923	0.571712
X-12329	MR-Egger	4	0.0959937	0.792695	-1.45766	1.64965	0.903614	3	-0.0512585	0.942942	-1.89939	1.79687	0.956648	3	-0.039388	0.975983	-1.95228	1.8735	0.967808
X-12329	MR-Egger intercept	4	-0.00779194	0.111882	-0.227077	0.211493	0.944477	3	0.0132542	0.129648	-0.240852	0.26736	0.918573	3	0.0116753	0.135392	-0.253688	0.277038	0.931281
X-10346	Inverse-variance weighted	4	0.0603672	0.0334192	-0.0051333	0.125868	0.070862	3	0.060696	0.041122	-0.0199016	0.141294	0.139944	3	0.0601581	0.0407566	-0.0197234	0.14004	0.139935
X-10346	Weighted median	4	0.0614794	0.0381407	-0.013275	0.136234	0.106981	3	0.0575308	0.0476367	-0.0358354	0.150897	0.227163	3	0.0568109	0.0472098	-0.0357186	0.14934	0.228833
X-10346	MR-Egger	4	0.0654402	0.508492	-0.931187	1.06207	0.897599	3	0.0178401	0.60854	-1.17488	1.21056	0.976612	3	0.0168744	0.629764	-1.21744	1.25119	0.978623
X-10346	MR-Egger intercept	4	-0.000716854	0.0716976	-0.141242	0.139808	0.992023	3	0.00589953	0.0835799	-0.157914	0.169713	0.943728	3	0.00601069	0.0872703	-0.165036	0.177057	0.94509
ADpSGEGDFXAEGGGVR*	Inverse-variance weighted	4	-0.0131144	0.0221046	-0.0564387	0.0302099	0.55299	3	-0.0242354	0.0260793	-0.0753498	0.0268791	0.352736	3	-0.0240348	0.0258503	-0.0747005	0.0266308	0.35249
ADpSGEGDFXAEGGGVR*	Weighted median	4	-0.014669	0.0252449	-0.064148	0.0348101	0.561196	3	-0.0241393	0.0297835	-0.0825138	0.0342352	0.417657	3	-0.0239705	0.0295473	-0.0818821	0.0339412	0.417218
ADpSGEGDFXAEGGGVR*	MR-Egger	4	-0.0446438	0.328641	-0.688769	0.599482	0.891945	3	0.0296117	0.377139	-0.709568	0.768791	0.937417	3	0.0303031	0.390329	-0.734728	0.795335	0.938119
ADpSGEGDFXAEGGGVR*	MR-Egger intercept	4	0.00448064	0.0465975	-0.0868488	0.0958101	0.923396	3	-0.00744001	0.0519842	-0.109327	0.0944472	0.886195	3	-0.00757282	0.0542789	-0.113958	0.0988119	0.889042
1-eicosatrienoylglycerophosphocholine*	Inverse-variance weighted	4	-0.0237161	0.0123319	-0.0478861	0.000453985	0.0544612	3	-0.0235849	0.0146276	-0.0522545	0.00508469	0.106885	3	-0.0234115	0.0144998	-0.0518305	0.00500753	0.106395
1-eicosatrienoylglycerophosphocholine*	Weighted median	4	-0.0237805	0.0144468	-0.0520957	0.00453475	0.0997491	3	-0.0300779	0.0171216	-0.0636355	0.00347975	0.0789645	3	-0.0297813	0.0169909	-0.0630828	0.00352022	0.0796396
1-eicosatrienoylglycerophosphocholine*	MR-Egger	4	0.152487	0.180202	-0.200701	0.505676	0.397439	3	0.146927	0.20817	-0.26108	0.554933	0.480313	3	0.152752	0.215525	-0.269669	0.575173	0.478483
1-eicosatrienoylglycerophosphocholine*	MR-Egger intercept	4	-0.0250635	0.0255722	-0.075184	0.025057	0.327032	3	-0.0236136	0.0287576	-0.0799776	0.0327503	0.411575	3	-0.0246064	0.0300361	-0.0834761	0.0342633	0.412657
1-docosahexaenoylglycerophosphocholine*	Inverse-variance weighted	4	0.0253461	0.0132242	-0.000572878	0.0512651	0.0552832	3	0.0306355	0.0159136	-0.000554609	0.0618256	0.0542153	3	0.0303713	0.0157683	-0.000533897	0.0612766	0.0540913
1-docosahexaenoylglycerophosphocholine*	Weighted median	4	0.0257604	0.0150942	-0.00382358	0.0553445	0.0878873	3	0.03011	0.0192195	-0.00755954	0.0677796	0.117199	3	0.0299862	0.0190416	-0.00733459	0.067307	0.115308
1-docosahexaenoylglycerophosphocholine*	MR-Egger	4	0.0807996	0.201454	-0.314044	0.475643	0.68836	3	0.004125	0.237678	-0.461716	0.469966	0.986153	3	0.006863	0.246251	-0.475781	0.489507	0.977766
1-docosahexaenoylglycerophosphocholine*	MR-Egger intercept	4	-0.00782837	0.028378	-0.0634482	0.0477915	0.782655	3	0.00363474	0.0325139	-0.0600913	0.0673608	0.91099	3	0.00325221	0.0339972	-0.063381	0.0698854	0.92379
X-12405	Inverse-variance weighted	4	-0.0302896	0.0144131	-0.0585389	-0.00204039	0.0355946	3	-0.0292182	0.0174125	-0.0633461	0.00490976	0.0933477	3	-0.0289432	0.0172613	-0.0627746	0.00488832	0.0935878
X-12405	Weighted median	4	-0.029298	0.0166272	-0.0618867	0.0032906	0.0780594	3	-0.0275106	0.020116	-0.0669371	0.011916	0.171437	3	-0.0272111	0.0199399	-0.0662926	0.0118703	0.17236
X-12405	MR-Egger	4	-0.0913717	0.212542	-0.507946	0.325203	0.667268	3	-0.140885	0.25933	-0.649163	0.367392	0.586946	3	-0.14545	0.268016	-0.670751	0.379851	0.587342
X-12405	MR-Egger intercept	4	0.00861103	0.029894	-0.0499802	0.0672023	0.773307	3	0.0154052	0.0356956	-0.0545569	0.0853674	0.666052	3	0.0162108	0.0372144	-0.0567281	0.0891496	0.663123
X-12407	Inverse-variance weighted	4	-0.00142171	0.0303768	-0.0609592	0.0581158	0.962671	3	-3.90091e-05	0.0359401	-0.0704803	0.0704023	0.999134	3	-4.38718e-05	0.0356211	-0.0698599	0.0697722	0.999017
X-12407	Weighted median	4	0.000570435	0.0345176	-0.0670828	0.0682236	0.986815	3	-0.00379321	0.0412495	-0.0846408	0.0770544	0.926732	3	-0.00383912	0.0408912	-0.0839845	0.0763062	0.9252
X-12407	MR-Egger	4	0.0458124	0.460209	-0.856181	0.947806	0.920704	3	-0.0378764	0.533228	-1.08298	1.00723	0.943372	3	-0.0421742	0.551762	-1.12361	1.03926	0.939073
X-12407	MR-Egger intercept	4	-0.00668984	0.065038	-0.134162	0.120782	0.918074	3	0.00520807	0.0732284	-0.138317	0.148733	0.943302	3	0.00584979	0.0764523	-0.143994	0.155693	0.939009
X-12428	Inverse-variance weighted	4	-0.0151361	0.0296002	-0.0731514	0.0428792	0.609104	3	-0.0276196	0.0351218	-0.0964572	0.0412179	0.431636	3	-0.0272645	0.0348149	-0.0955005	0.0409714	0.433552
X-12428	Weighted median	4	0.00146901	0.0354372	-0.0679867	0.0709247	0.966934	3	-0.013355	0.0420984	-0.0958665	0.0691564	0.751067	3	-0.012773	0.0418125	-0.094724	0.069178	0.759998
X-12428	MR-Egger	4	-0.534256	0.436984	-1.39073	0.322217	0.221482	3	-0.594074	0.5041	-1.58209	0.393944	0.238603	3	-0.615366	0.521752	-1.63798	0.407248	0.23823
X-12428	MR-Egger intercept	4	0.0738041	0.061984	-0.0476824	0.195291	0.233773	3	0.0783746	0.0695777	-0.0579953	0.214744	0.259983	3	0.0820706	0.072649	-0.0603189	0.22446	0.258609
1-eicosadienoylglycerophosphocholine*	Inverse-variance weighted	4	0.0144517	0.0143604	-0.0136942	0.0425977	0.314244	3	0.0175172	0.0170026	-0.0158073	0.0508418	0.302884	3	0.0173495	0.016854	-0.0156837	0.0503828	0.303291
1-eicosadienoylglycerophosphocholine*	Weighted median	4	0.0132377	0.0164926	-0.0190873	0.0455627	0.422181	3	0.0198126	0.0198149	-0.0190239	0.0586491	0.317367	3	0.0195314	0.0196637	-0.0190088	0.0580717	0.320578
1-eicosadienoylglycerophosphocholine*	MR-Egger	4	0.154797	0.210898	-0.258555	0.56815	0.462953	3	0.13868	0.243375	-0.338326	0.615686	0.5688	3	0.145878	0.251921	-0.347878	0.639634	0.562548
1-eicosadienoylglycerophosphocholine*	MR-Egger intercept	4	-0.0199555	0.0299176	-0.078593	0.0386819	0.504762	3	-0.0167689	0.0336008	-0.0826252	0.0490875	0.617736	3	-0.0179415	0.0350873	-0.0867114	0.0508284	0.609114
X-12435	Inverse-variance weighted	4	-0.155374	0.0716351	-0.295776	-0.0149713	0.0300858	3	-0.168451	0.0848093	-0.334674	-0.002228	0.0470073	3	-0.166911	0.0840766	-0.331698	-0.00212371	0.0471196
X-12435	Weighted median	4	-0.14551	0.0828635	-0.307919	0.0168998	0.0790856	3	-0.163792	0.0975651	-0.355016	0.0274319	0.0931912	3	-0.162187	0.0968096	-0.351931	0.0275559	0.0938707
X-12435	MR-Egger	4	-0.500201	1.04789	-2.55402	1.55362	0.633119	3	-0.562285	1.21204	-2.93783	1.81326	0.642707	3	-0.580889	1.25403	-3.03875	1.87697	0.643209
X-12435	MR-Egger intercept	4	0.0490674	0.148761	-0.242499	0.340634	0.741521	3	0.0546004	0.167623	-0.273934	0.383135	0.744625	3	0.0578816	0.174942	-0.284999	0.400762	0.740749
X-12441	Inverse-variance weighted	4	-0.0686702	0.0406388	-0.148321	0.0109804	0.0910722	3	-0.0861816	0.0483812	-0.181007	0.00864381	0.0748629	3	-0.0854023	0.0479573	-0.179397	0.00859228	0.0749453
X-12441	Weighted median	4	-0.0762449	0.0471955	-0.168746	0.0162566	0.1062	3	-0.0821181	0.0557376	-0.191362	0.0271255	0.14067	3	-0.0810175	0.0553126	-0.189428	0.0273932	0.142997
X-12441	MR-Egger	4	-0.143196	0.601959	-1.32302	1.03662	0.811971	3	-0.226053	0.697337	-1.59281	1.1407	0.745812	3	-0.234982	0.721734	-1.64956	1.17959	0.744742
X-12441	MR-Egger intercept	4	0.0105862	0.085311	-0.15662	0.177793	0.901245	3	0.0193377	0.0961771	-0.169166	0.207841	0.840649	3	0.0208586	0.100422	-0.175964	0.217682	0.835456
X-12442	Inverse-variance weighted	4	0.0137321	0.0151755	-0.0160113	0.0434755	0.365526	3	0.0111221	0.0187531	-0.0256333	0.0478775	0.553127	3	0.0110457	0.0185892	-0.0253885	0.0474799	0.552378
X-12442	Weighted median	4	0.015161	0.0173969	-0.0189363	0.0492583	0.383494	3	0.0140368	0.0218643	-0.0288165	0.0568901	0.520876	3	0.0138865	0.0216737	-0.0285932	0.0563663	0.521713
X-12442	MR-Egger	4	-0.160927	0.22966	-0.611051	0.289198	0.483478	3	-0.136589	0.276432	-0.678385	0.405208	0.621227	3	-0.142957	0.285867	-0.703245	0.417332	0.617018
X-12442	MR-Egger intercept	4	0.0246964	0.0324024	-0.0388112	0.088204	0.445954	3	0.0203824	0.0380566	-0.0542072	0.094972	0.592248	3	0.0214339	0.0397024	-0.0563814	0.0992493	0.589291
X-12443	Inverse-variance weighted	4	0.0153198	0.0308054	-0.0450577	0.0756972	0.618972	3	0.017369	0.0367437	-0.0546473	0.0893853	0.636423	3	0.0171849	0.0364161	-0.0541893	0.0885592	0.636995
X-12443	Weighted median	4	0.0138079	0.0348618	-0.05452	0.0821359	0.692049	3	0.0112586	0.042477	-0.0719948	0.094512	0.79097	3	0.0110383	0.0421545	-0.0715829	0.0936595	0.793434
X-12443	MR-Egger	4	0.189781	0.459071	-0.709981	1.08954	0.679312	3	0.183234	0.534399	-0.864169	1.23064	0.731689	3	0.190759	0.553386	-0.893857	1.27538	0.73031
X-12443	MR-Egger intercept	4	-0.0247263	0.0649171	-0.151961	0.102509	0.703285	3	-0.0228607	0.0734803	-0.166879	0.121158	0.755714	3	-0.0241336	0.0767754	-0.174611	0.126344	0.753263
X-12450	Inverse-variance weighted	4	-0.00535267	0.0133889	-0.0315944	0.0208891	0.689316	3	-0.00601761	0.0158814	-0.0371446	0.0251094	0.704755	3	-0.00595372	0.0157426	-0.0368086	0.0249012	0.705288
X-12450	Weighted median	4	-0.00640852	0.0152353	-0.0362692	0.0234521	0.674021	3	-0.00714707	0.0181445	-0.0427097	0.0284156	0.693658	3	-0.00707194	0.0180074	-0.0423657	0.0282218	0.694523
X-12450	MR-Egger	4	-0.0170742	0.195647	-0.400536	0.366388	0.930457	3	-0.0487883	0.226014	-0.491767	0.39419	0.829093	3	-0.05	0.233998	-0.508628	0.408628	0.830799
X-12450	MR-Egger intercept	4	0.00166729	0.0277641	-0.0527493	0.0560838	0.952114	3	0.00592318	0.0312226	-0.055272	0.0671183	0.849538	3	0.00615236	0.0326106	-0.0577633	0.070068	0.850359
X-12456	Inverse-variance weighted	4	-0.0678897	0.0183582	-0.103871	-0.0319084	0.000217248	3	-0.0723084	0.0219347	-0.1153	-0.0293172	0.000978855	3	-0.071661	0.0217377	-0.114266	-0.0290559	0.00097855
X-12456	Weighted median	4	-0.0681079	0.0216143	-0.110471	-0.0257446	0.00162684	3	-0.0760116	0.0264021	-0.127759	-0.0242645	0.00398934	3	-0.0756452	0.0261907	-0.126978	-0.0243123	0.00387398
X-12456	MR-Egger	4	-0.133437	0.276053	-0.674491	0.407618	0.628831	3	-0.102143	0.322428	-0.734091	0.529805	0.751401	3	-0.107696	0.333904	-0.762135	0.546744	0.747047
X-12456	MR-Egger intercept	4	0.00927709	0.0389843	-0.0671307	0.0856849	0.811904	3	0.00410431	0.0442534	-0.0826307	0.0908393	0.926106	3	0.0050012	0.0462436	-0.0856347	0.0956371	0.913878
X-12465	Inverse-variance weighted	4	-0.0120959	0.0180969	-0.0475652	0.0233733	0.503878	3	-0.0103942	0.021662	-0.0528509	0.0320626	0.631345	3	-0.0102802	0.0214673	-0.0523554	0.031795	0.632027
X-12465	Weighted median	4	-0.0146124	0.0205956	-0.054979	0.0257542	0.478018	3	-0.0150413	0.0253483	-0.0647231	0.0346405	0.552924	3	-0.0149116	0.0251586	-0.0642216	0.0343985	0.553381
X-12465	MR-Egger	4	0.0202198	0.271055	-0.511038	0.551478	0.940536	3	-0.0781918	0.316882	-0.699269	0.542885	0.805099	3	-0.0793754	0.328214	-0.722663	0.563912	0.808904
X-12465	MR-Egger intercept	4	-0.0045746	0.0382848	-0.0796113	0.0704621	0.904888	3	0.00933001	0.0435059	-0.07594	0.0946	0.830193	3	0.00959292	0.0454704	-0.0795273	0.0987132	0.83291
octanoylcarnitine	Inverse-variance weighted	4	-0.00846371	0.0143604	-0.0366097	0.0196822	0.555609	3	-0.0117867	0.0170026	-0.0451113	0.0215378	0.488164	3	-0.011721	0.016854	-0.0447542	0.0213123	0.486779
octanoylcarnitine	Weighted median	4	-0.00827555	0.016491	-0.0405973	0.0240462	0.615792	3	-0.0183513	0.0197966	-0.057152	0.0204494	0.353931	3	-0.0183781	0.0196481	-0.0568876	0.0201315	0.349602
octanoylcarnitine	MR-Egger	4	0.141247	0.210898	-0.272105	0.554599	0.503023	3	0.182192	0.243375	-0.294814	0.659198	0.454095	3	0.189183	0.251921	-0.304573	0.682939	0.452676
octanoylcarnitine	MR-Egger intercept	4	-0.0212871	0.0299176	-0.0799245	0.0373504	0.47676	3	-0.0268466	0.0336008	-0.092703	0.0390097	0.424298	3	-0.0280445	0.0350873	-0.0968144	0.0407254	0.424129
alpha-hydroxyisovalerate	Inverse-variance weighted	4	-0.00673581	0.0133042	-0.0328116	0.01934	0.612653	3	-0.00919902	0.0159136	-0.0403891	0.0219911	0.563224	3	-0.00907717	0.0157683	-0.0399824	0.0218281	0.564845
alpha-hydroxyisovalerate	Weighted median	4	-0.00210736	0.0154039	-0.0322984	0.0280837	0.891183	3	-0.00387902	0.0193546	-0.0418133	0.0340552	0.841153	3	-0.00370783	0.0191844	-0.0413085	0.0338928	0.846745
alpha-hydroxyisovalerate	MR-Egger	4	-0.134162	0.203735	-0.533475	0.265151	0.510209	3	-0.200407	0.237678	-0.666248	0.265434	0.399125	3	-0.207497	0.246251	-0.690141	0.275147	0.399439
alpha-hydroxyisovalerate	MR-Egger intercept	4	0.0180092	0.0287325	-0.0383055	0.0743239	0.530798	3	0.0262156	0.0325139	-0.0375104	0.0899417	0.420075	3	0.02745	0.0339972	-0.0391833	0.0940832	0.419425
N-acetylthreonine	Inverse-variance weighted	4	-0.0418806	0.00907393	-0.0596651	-0.024096	3.92184e-06	3	-0.0440451	0.0107317	-0.0650788	-0.0230115	4.05672e-05	3	-0.0436816	0.0106379	-0.0645315	-0.0228318	4.02152e-05
N-acetylthreonine	Weighted median	4	-0.0407227	0.0109383	-0.0621614	-0.0192841	0.000196908	3	-0.0408874	0.0130495	-0.0664639	-0.0153109	0.00172879	3	-0.0405689	0.0129334	-0.0659179	-0.0152199	0.00170831
N-acetylthreonine	MR-Egger	4	0.0182014	0.133666	-0.243779	0.280182	0.891686	3	0.0343016	0.154154	-0.267835	0.336438	0.823913	3	0.0342323	0.159548	-0.278475	0.34694	0.830112
N-acetylthreonine	MR-Egger intercept	4	-0.00854102	0.0189576	-0.0456972	0.0286152	0.652326	3	-0.0108391	0.0212752	-0.0525377	0.0308595	0.610421	3	-0.0108721	0.0222137	-0.0544102	0.032666	0.624536
decanoylcarnitine	Inverse-variance weighted	4	-0.0225333	0.0149936	-0.0519202	0.00685371	0.132876	3	-0.0273066	0.0178864	-0.0623633	0.00775007	0.126843	3	-0.027097	0.0177247	-0.0618369	0.00764283	0.126322
decanoylcarnitine	Weighted median	4	-0.0221432	0.0173601	-0.0561685	0.011882	0.202125	3	-0.0352279	0.0218252	-0.0780045	0.00754867	0.106507	3	-0.034865	0.0216664	-0.0773303	0.00760037	0.107579
decanoylcarnitine	MR-Egger	4	0.161629	0.226885	-0.283058	0.606316	0.476228	3	0.196426	0.2634	-0.319828	0.71268	0.455828	3	0.205175	0.272845	-0.329592	0.739942	0.452061
decanoylcarnitine	MR-Egger intercept	4	-0.0260714	0.0320494	-0.0888871	0.0367442	0.415945	3	-0.0307502	0.0361186	-0.101541	0.0400409	0.394565	3	-0.0322087	0.037755	-0.106207	0.0417897	0.393605
1-palmitoylglycerophosphocholine	Inverse-variance weighted	4	-0.0119752	0.00634211	-0.0244055	0.000455131	0.058999	3	-0.0117132	0.00752277	-0.0264576	0.00303114	0.119462	3	-0.0116199	0.00745702	-0.0262354	0.00299559	0.119174
1-palmitoylglycerophosphocholine	Weighted median	4	-0.0100855	0.00759144	-0.0249644	0.0047935	0.184003	3	-0.00994627	0.00900274	-0.0275913	0.00769877	0.269244	3	-0.00984438	0.00893728	-0.0273611	0.00767237	0.270681
1-palmitoylglycerophosphocholine	MR-Egger	4	0.107523	0.0926751	-0.0741168	0.289163	0.245961	3	0.0651363	0.107059	-0.144696	0.274968	0.542913	3	0.0689794	0.110841	-0.148265	0.286224	0.533727
1-palmitoylglycerophosphocholine	MR-Egger intercept	4	-0.0169977	0.0131514	-0.0427739	0.00877858	0.196197	3	-0.0106427	0.0147896	-0.0396298	0.0183445	0.47177	3	-0.0112581	0.0154471	-0.0415339	0.0190178	0.466117
1-heptadecanoylglycerophosphocholine	Inverse-variance weighted	4	-0.0162752	0.0144753	-0.0446463	0.0120959	0.260869	3	-0.0147646	0.0174002	-0.0488685	0.0193392	0.396142	3	-0.0146578	0.0172482	-0.0484636	0.019148	0.395426
1-heptadecanoylglycerophosphocholine	Weighted median	4	-0.017915	0.0167405	-0.0507257	0.0148957	0.284547	3	-0.013327	0.0207788	-0.0540527	0.0273988	0.521281	3	-0.0132172	0.0206209	-0.0536334	0.0271989	0.521546
1-heptadecanoylglycerophosphocholine	MR-Egger	4	0.149958	0.212084	-0.26572	0.565636	0.479524	3	0.170029	0.253728	-0.32727	0.667327	0.502781	3	0.179113	0.262475	-0.335329	0.693556	0.494986
1-heptadecanoylglycerophosphocholine	MR-Egger intercept	4	-0.023513	0.0299284	-0.0821716	0.0351457	0.432078	3	-0.0255264	0.0349662	-0.0940588	0.0430061	0.465372	3	-0.0269973	0.0364905	-0.0985174	0.0445228	0.459395
1-oleoylglycerophosphocholine	Inverse-variance weighted	4	-0.0221838	0.00966967	-0.041136	-0.00323159	0.0217811	3	-0.0248706	0.0124216	-0.0492164	-0.000524763	0.0452621	3	-0.0246665	0.012313	-0.0487996	-0.000533441	0.0451465
1-oleoylglycerophosphocholine	Weighted median	4	-0.0217203	0.0114531	-0.044168	0.000727371	0.0578998	3	-0.0263205	0.0144636	-0.0546686	0.00202755	0.0687924	3	-0.0260111	0.0143271	-0.0540917	0.00206945	0.0694439
1-oleoylglycerophosphocholine	MR-Egger	4	0.116657	0.149722	-0.176793	0.410107	0.435888	3	0.0834941	0.187083	-0.283182	0.45017	0.655385	3	0.0877909	0.19335	-0.291169	0.466751	0.649792
1-oleoylglycerophosphocholine	MR-Egger intercept	4	-0.019554	0.0210425	-0.0607966	0.0216886	0.352753	3	-0.0149235	0.0257074	-0.0653091	0.0354621	0.561568	3	-0.0156209	0.0268028	-0.0681535	0.0369117	0.560023
1-stearoylglycerophosphocholine	Inverse-variance weighted	4	-0.0264095	0.0126996	-0.0513002	-0.00151878	0.0375662	3	-0.0289814	0.0154598	-0.059282	0.00131924	0.0608436	3	-0.0287422	0.0153247	-0.058778	0.00129366	0.0607175
1-stearoylglycerophosphocholine	Weighted median	4	-0.0252278	0.0146819	-0.0540038	0.00354826	0.085744	3	-0.0311982	0.0179142	-0.0663095	0.00391304	0.0815904	3	-0.0308344	0.0177675	-0.0656581	0.00398921	0.0826627
1-stearoylglycerophosphocholine	MR-Egger	4	0.0711717	0.190593	-0.302383	0.444726	0.708833	3	0.0610491	0.224511	-0.378984	0.501082	0.785683	3	0.0639987	0.232281	-0.391264	0.519261	0.782915
1-stearoylglycerophosphocholine	MR-Egger intercept	4	-0.0138385	0.0269688	-0.0666964	0.0390194	0.607861	3	-0.0124415	0.0309519	-0.0731061	0.0482231	0.687712	3	-0.0129265	0.0323055	-0.076244	0.0503911	0.689059
5-dodecenoate (12:1n7)	Inverse-variance weighted	4	-0.00954297	0.0150918	-0.0391223	0.0200363	0.527171	3	-0.0122245	0.0178864	-0.0472812	0.0228322	0.494321	3	-0.0120943	0.0177247	-0.0468342	0.0226456	0.495024
5-dodecenoate (12:1n7)	Weighted median	4	-0.010174	0.0172015	-0.0438884	0.0235404	0.554212	3	-0.015152	0.0210674	-0.0564434	0.0261393	0.472007	3	-0.0150009	0.0209115	-0.0559866	0.0259849	0.473158
5-dodecenoate (12:1n7)	MR-Egger	4	-0.0804024	0.226995	-0.525304	0.364499	0.723186	3	-0.0847699	0.2634	-0.601024	0.431484	0.747582	3	-0.0865667	0.272845	-0.621334	0.4482	0.751036
5-dodecenoate (12:1n7)	MR-Egger intercept	4	0.0100296	0.0320583	-0.0528035	0.0728627	0.75439	3	0.00997077	0.0361186	-0.0608203	0.0807618	0.782505	3	0.0103269	0.037755	-0.0636715	0.0843254	0.78445
stearidonate (18:4n3)	Inverse-variance weighted	4	0.0620469	0.0145168	0.0335945	0.0904992	1.91864e-05	3	0.0665112	0.0171352	0.0329268	0.100096	0.00010379	3	0.0659769	0.0169854	0.0326861	0.0992677	0.000102615
stearidonate (18:4n3)	Weighted median	4	0.0612795	0.0176689	0.0266492	0.0959099	0.000523921	3	0.0759208	0.0212865	0.0342001	0.117642	0.000361616	3	0.0750934	0.0211099	0.0337187	0.116468	0.000374753
stearidonate (18:4n3)	MR-Egger	4	-0.150601	0.213198	-0.568462	0.26726	0.479947	3	-0.178997	0.243857	-0.656947	0.298954	0.462934	3	-0.186224	0.252472	-0.68106	0.308611	0.460755
stearidonate (18:4n3)	MR-Egger intercept	4	0.0302778	0.0302857	-0.0290811	0.0896366	0.317438	3	0.0339997	0.0336875	-0.0320266	0.100026	0.312847	3	0.0352273	0.0351852	-0.0337344	0.104189	0.316732
10-heptadecenoate (17:1n7)	Inverse-variance weighted	4	-0.015287	0.0122626	-0.0393212	0.00874725	0.212531	3	-0.0156696	0.0151367	-0.0453371	0.0139978	0.300573	3	-0.0154971	0.0150045	-0.0449053	0.0139111	0.301682
10-heptadecenoate (17:1n7)	Weighted median	4	-0.0131109	0.0141118	-0.0407695	0.0145478	0.352853	3	-0.0186083	0.0178919	-0.0536758	0.0164592	0.298321	3	-0.0183973	0.0177421	-0.0531712	0.0163767	0.29977
10-heptadecenoate (17:1n7)	MR-Egger	4	-0.0941832	0.185759	-0.458265	0.269899	0.612143	3	-0.161833	0.223414	-0.599716	0.27605	0.468843	3	-0.165486	0.23103	-0.618296	0.287324	0.473808
10-heptadecenoate (17:1n7)	MR-Egger intercept	4	0.0111555	0.0262082	-0.0402116	0.0625227	0.670362	3	0.0201664	0.0307539	-0.0401103	0.080443	0.511996	3	0.0208728	0.0320827	-0.0420082	0.0837537	0.51531
10-nonadecenoate (19:1n9)	Inverse-variance weighted	4	-0.0111691	0.0139009	-0.0384144	0.0160762	0.421699	3	-0.0125251	0.0164176	-0.044703	0.0196528	0.445519	3	-0.0123652	0.0162752	-0.044264	0.0195336	0.447399
10-nonadecenoate (19:1n9)	Weighted median	4	-0.00666494	0.0162803	-0.0385737	0.0252438	0.682255	3	-0.0132499	0.0194224	-0.0513171	0.0248172	0.495112	3	-0.0130174	0.0192905	-0.0508261	0.0247913	0.499796
10-nonadecenoate (19:1n9)	MR-Egger	4	-0.154967	0.202944	-0.55273	0.242796	0.445109	3	-0.229713	0.233567	-0.687496	0.228071	0.325363	3	-0.236413	0.241743	-0.710221	0.237394	0.328097
10-nonadecenoate (19:1n9)	MR-Egger intercept	4	0.0204735	0.0288267	-0.0360258	0.0769729	0.477563	3	0.0301098	0.0323005	-0.0331981	0.0934177	0.351245	3	0.0313263	0.0337237	-0.0347709	0.0974235	0.352935
epiandrosterone sulfate	Inverse-variance weighted	4	-0.0327557	0.0229337	-0.0777049	0.0121934	0.153211	3	-0.0381259	0.0272394	-0.0915141	0.0152622	0.161614	3	-0.0377507	0.026997	-0.0906639	0.0151624	0.162014
epiandrosterone sulfate	Weighted median	4	-0.0325278	0.0264533	-0.0843753	0.0193196	0.218834	3	-0.0375345	0.0318593	-0.0999776	0.0249085	0.238743	3	-0.0371114	0.0316246	-0.0990946	0.0248717	0.240596
epiandrosterone sulfate	MR-Egger	4	-0.127885	0.342493	-0.799159	0.54339	0.708856	3	-0.1967	0.395758	-0.97237	0.578971	0.619175	3	-0.202805	0.409792	-1.00598	0.600373	0.620673
epiandrosterone sulfate	MR-Egger intercept	4	0.013495	0.048477	-0.0815182	0.108508	0.780722	3	0.0218633	0.0544357	-0.0848286	0.128555	0.687952	3	0.0229565	0.0568721	-0.0885107	0.134424	0.686469
linolenate [alpha or gamma; (18:3n3 or 6)]	Inverse-variance weighted	4	0.0272532	0.0127922	0.00218091	0.0523254	0.0331343	3	0.0258937	0.0153656	-0.00422237	0.0560097	0.0919557	3	0.0256792	0.015226	-0.00416332	0.0555216	0.0916939
linolenate [alpha or gamma; (18:3n3 or 6)]	Weighted median	4	0.030384	0.0148619	0.00125509	0.0595128	0.0409127	3	0.0279623	0.0187736	-0.00883322	0.0647578	0.136369	3	0.0276319	0.0186053	-0.00883378	0.0640976	0.1375
linolenate [alpha or gamma; (18:3n3 or 6)]	MR-Egger	4	-0.10648	0.193696	-0.486117	0.273157	0.582506	3	-0.125807	0.227757	-0.572202	0.320587	0.58069	3	-0.132511	0.235946	-0.594957	0.329935	0.574378
linolenate [alpha or gamma; (18:3n3 or 6)]	MR-Egger intercept	4	0.018897	0.0273102	-0.03463	0.072424	0.488975	3	0.0208258	0.0311956	-0.0403164	0.081968	0.504397	3	0.0219114	0.0326135	-0.0420099	0.0858327	0.501679
X-12510	Inverse-variance weighted	4	-0.0123702	0.0152215	-0.0422038	0.0174635	0.416405	3	-0.0121172	0.0179711	-0.0473398	0.0231055	0.500146	3	-0.0119956	0.017814	-0.0469104	0.0229191	0.500704
X-12510	Weighted median	4	-0.0125419	0.0174437	-0.0467309	0.0216472	0.472147	3	-0.0116174	0.0206409	-0.0520728	0.028838	0.573548	3	-0.0114402	0.02049	-0.0515999	0.0287195	0.576619
X-12510	MR-Egger	4	-0.0875654	0.223497	-0.525611	0.35048	0.695208	3	-0.114173	0.255752	-0.615438	0.387092	0.655292	3	-0.119488	0.264788	-0.638462	0.399486	0.651802
X-12510	MR-Egger intercept	4	0.0107061	0.0317471	-0.0515171	0.0729294	0.735942	3	0.0141335	0.0353308	-0.0551137	0.0833806	0.689133	3	0.0150145	0.0369015	-0.0573112	0.0873401	0.684096
X-12524	Inverse-variance weighted	4	-0.00849688	0.00598977	-0.0202366	0.00324286	0.156026	3	-0.00947922	0.00710483	-0.0234044	0.004446	0.182141	3	-0.00939241	0.00704274	-0.0231959	0.0044111	0.182325
X-12524	Weighted median	4	-0.00878678	0.00685722	-0.0222267	0.00465312	0.200056	3	-0.00994751	0.00816727	-0.0259551	0.00606005	0.223235	3	-0.00988788	0.00810538	-0.0257741	0.00599836	0.222497
X-12524	MR-Egger	4	-0.0129307	0.0875265	-0.184479	0.158618	0.882553	3	-0.0186449	0.101111	-0.21682	0.17953	0.8537	3	-0.0188626	0.104683	-0.224038	0.186313	0.857006
X-12524	MR-Egger intercept	4	0.000630669	0.0124208	-0.0237136	0.0249749	0.959505	3	0.00126933	0.013968	-0.0261074	0.0286461	0.927592	3	0.00132279	0.014589	-0.0272711	0.0299166	0.927755
bilirubin (E	Inverse-variance weighted	4	-0.0415624	0.0191447	-0.0790854	-0.00403947	0.0299342	3	-0.041501	0.0229543	-0.0864905	0.00348856	0.0706088	3	-0.0411741	0.0227537	-0.0857704	0.00342229	0.0703644
bilirubin (E	Weighted median	4	-0.0406594	0.0220569	-0.0838902	0.00257133	0.0652726	3	-0.0390761	0.0267298	-0.0914656	0.0133134	0.143771	3	-0.0388166	0.0265158	-0.0907866	0.0131533	0.143219
bilirubin (E	MR-Egger	4	0.0998924	0.281696	-0.452221	0.652006	0.722881	3	0.107789	0.335958	-0.550677	0.766255	0.748331	3	0.10985	0.3475	-0.571237	0.790937	0.751915
bilirubin (E	MR-Egger intercept	4	-0.0200095	0.0397551	-0.097928	0.0579091	0.614741	3	-0.0206146	0.0462821	-0.111326	0.0700966	0.656022	3	-0.0210338	0.0482941	-0.115689	0.0736209	0.663173
X-12544	Inverse-variance weighted	4	0.00735865	0.0223728	-0.0364913	0.0512086	0.742224	3	0.00718385	0.0262359	-0.0442376	0.0586053	0.784225	3	0.00707066	0.0260066	-0.0439014	0.0580427	0.785715
X-12544	Weighted median	4	0.013139	0.0255823	-0.0370014	0.0632793	0.607534	3	0.0179856	0.0304474	-0.0416902	0.0776614	0.554714	3	0.0178764	0.0301918	-0.0412985	0.0770513	0.553787
X-12544	MR-Egger	4	0.141007	0.337847	-0.52116	0.803175	0.676407	3	0.170202	0.387854	-0.589978	0.930383	0.660784	3	0.171322	0.401057	-0.614736	0.957381	0.66925
X-12544	MR-Egger intercept	4	-0.0189654	0.0478367	-0.112724	0.0747929	0.691766	3	-0.0224885	0.0533822	-0.127116	0.0821387	0.673556	3	-0.0228541	0.055686	-0.131997	0.0862885	0.681505
X-12556	Inverse-variance weighted	4	-0.000200241	0.00992459	-0.0196521	0.0192516	0.983903	3	-0.00207647	0.0119477	-0.0254935	0.0213406	0.862025	3	-0.00201526	0.0118374	-0.0252161	0.0211856	0.864817
X-12556	Weighted median	4	0.00143126	0.0115574	-0.0212207	0.0240833	0.901442	3	-0.00235355	0.0147563	-0.0312753	0.0265682	0.873279	3	-0.00221313	0.0145923	-0.0308135	0.0263873	0.879452
X-12556	MR-Egger	4	-0.153477	0.154786	-0.456852	0.149899	0.321422	3	-0.193772	0.183965	-0.554336	0.166792	0.292198	3	-0.198979	0.190598	-0.572544	0.174587	0.2965
X-12556	MR-Egger intercept	4	0.021584	0.0217517	-0.0210486	0.0642167	0.321057	3	0.0261888	0.0250796	-0.0229662	0.0753438	0.296379	3	0.0271543	0.026226	-0.0242478	0.0785563	0.300485
1-arachidonoylglycerophosphoinositol*	Inverse-variance weighted	4	0.0113478	0.0101748	-0.0085944	0.03129	0.264727	3	0.0155366	0.0124216	-0.0088092	0.0398825	0.211015	3	0.0153924	0.012313	-0.00874066	0.0395255	0.211265
1-arachidonoylglycerophosphoinositol*	Weighted median	4	0.0109037	0.0116218	-0.0118746	0.033682	0.348137	3	0.0131403	0.014157	-0.0146069	0.0408875	0.353312	3	0.0129699	0.0140303	-0.0145291	0.0404688	0.355269
1-arachidonoylglycerophosphoinositol*	MR-Egger	4	0.0899219	0.150726	-0.205496	0.38534	0.550781	3	0.0680597	0.187083	-0.298617	0.434736	0.716012	3	0.0705962	0.19335	-0.308364	0.449556	0.715021
1-arachidonoylglycerophosphoinositol*	MR-Egger intercept	4	-0.0110441	0.0211372	-0.0524722	0.0303841	0.601326	3	-0.00723325	0.0257074	-0.0576188	0.0431524	0.778428	3	-0.00766808	0.0268028	-0.0602007	0.0448645	0.774807
X-12627	Inverse-variance weighted	4	0.021429	0.0157838	-0.00950668	0.0523646	0.174573	3	0.0254516	0.0188591	-0.0115116	0.0624149	0.177155	3	0.0252486	0.018688	-0.0113792	0.0618763	0.176676
X-12627	Weighted median	4	0.0189661	0.0183773	-0.0170526	0.0549849	0.302052	3	0.0271667	0.0233112	-0.0185225	0.0728559	0.243861	3	0.0268722	0.0231054	-0.0184135	0.072158	0.244818
X-12627	MR-Egger	4	-0.155215	0.23985	-0.625312	0.314882	0.517546	3	-0.188742	0.279248	-0.736057	0.358573	0.499108	3	-0.198931	0.289284	-0.765918	0.368056	0.491663
X-12627	MR-Egger intercept	4	0.0249877	0.0338551	-0.0413672	0.0913425	0.460468	3	0.0294102	0.038255	-0.0455683	0.104389	0.442016	3	0.0310573	0.039993	-0.0473275	0.109442	0.437413
X-12644	Inverse-variance weighted	4	0.0290509	0.0116976	0.0061241	0.0519777	0.0130098	3	0.0335606	0.0137917	0.00652933	0.0605919	0.0149583	3	0.0332841	0.0136712	0.00648907	0.0600792	0.0149076
X-12644	Weighted median	4	0.0289615	0.0135012	0.00249958	0.0554235	0.0319448	3	0.0311813	0.0162337	-0.000636045	0.0629987	0.054759	3	0.0309407	0.0161	-0.000614774	0.0624962	0.0546335
X-12644	MR-Egger	4	-0.00913159	0.172005	-0.346255	0.327991	0.957661	3	-0.0277185	0.196275	-0.41241	0.356973	0.887694	3	-0.0277852	0.203209	-0.426068	0.370497	0.891243
X-12644	MR-Egger intercept	4	0.00543787	0.0244398	-0.0424634	0.0533391	0.823924	3	0.00848637	0.0271143	-0.0446568	0.0616295	0.754292	3	0.00853012	0.0283198	-0.0469756	0.0640358	0.763257
X-12645	Inverse-variance weighted	4	-0.00796177	0.0164919	-0.0402854	0.0243619	0.629261	3	-0.00194431	0.0198291	-0.0408087	0.0369201	0.92189	3	-0.00191785	0.0196485	-0.0404282	0.0365925	0.922244
X-12645	Weighted median	4	-0.00901886	0.0191054	-0.0464648	0.028427	0.636885	3	-0.00511973	0.0235583	-0.0512931	0.0410536	0.827957	3	-0.00498984	0.0233587	-0.050772	0.0407923	0.830845
X-12645	MR-Egger	4	-0.116759	0.250525	-0.607778	0.37426	0.641173	3	-0.109042	0.295104	-0.687435	0.469351	0.711753	3	-0.115931	0.305733	-0.715156	0.483295	0.704547
X-12645	MR-Egger intercept	4	0.0153657	0.0353053	-0.0538314	0.0845627	0.663401	3	0.0146924	0.0403929	-0.0644763	0.093861	0.716055	3	0.0157818	0.0422325	-0.0669924	0.098556	0.708636
asparagine	Inverse-variance weighted	4	0.0120024	0.00845615	-0.00457131	0.0285762	0.15579	3	0.0133314	0.0100304	-0.00632774	0.0329905	0.183813	3	0.0132253	0.00994269	-0.00626199	0.0327126	0.183467
asparagine	Weighted median	4	0.010704	0.0096499	-0.00820943	0.0296175	0.267328	3	0.0129708	0.0115798	-0.00972518	0.0356668	0.262661	3	0.0128875	0.0114889	-0.00963021	0.0354053	0.261972
asparagine	MR-Egger	4	-0.026644	0.123567	-0.268831	0.215543	0.829281	3	-0.0298945	0.142745	-0.30967	0.249881	0.834116	3	-0.0306288	0.147788	-0.320289	0.259031	0.835817
asparagine	MR-Egger intercept	4	0.00549714	0.0175352	-0.0288712	0.0398655	0.753907	3	0.00598622	0.0197195	-0.0326633	0.0446358	0.761457	3	0.00612551	0.0205962	-0.0342423	0.0464933	0.766154
X-12680	Inverse-variance weighted	4	-0.0291582	0.0155909	-0.0597157	0.0013994	0.0614551	3	-0.0330322	0.0186497	-0.069585	0.00352047	0.0765282	3	-0.0327517	0.0184877	-0.0689871	0.00348357	0.0764713
X-12680	Weighted median	4	-0.0308168	0.018014	-0.0661236	0.00449003	0.0871343	3	-0.0336489	0.0213557	-0.0755053	0.00820762	0.11511	3	-0.0332411	0.0211861	-0.0747651	0.00828295	0.116647
X-12680	MR-Egger	4	0.0399085	0.231232	-0.413298	0.493115	0.862973	3	0.00918104	0.268207	-0.516495	0.534857	0.972693	3	0.00995934	0.277499	-0.533929	0.553847	0.97137
X-12680	MR-Egger intercept	4	-0.00981836	0.0327966	-0.0740985	0.0544618	0.764657	3	-0.00584437	0.037043	-0.0784473	0.0667586	0.874636	3	-0.0059639	0.038662	-0.0817401	0.0698123	0.877407
X-12696	Inverse-variance weighted	4	-0.196878	0.00942642	-0.215353	-0.178402	7.21627e-97	3	-0.208655	0.0111498	-0.230508	-0.186802	3.82173e-78	3	-0.206885	0.0110523	-0.228547	-0.185223	3.4891e-78
X-12696	Weighted median	4	-0.197664	0.0199186	-0.236703	-0.158624	3.2874e-23	3	-0.214421	0.0241435	-0.261742	-0.167101	6.61821e-19	3	-0.212865	0.0237988	-0.25951	-0.16622	3.74151e-19
X-12696	MR-Egger	4	-0.0213684	0.138815	-0.29344	0.250704	0.877661	3	0.0588839	0.160102	-0.254911	0.372679	0.713031	3	0.0609663	0.165706	-0.263812	0.385744	0.712934
X-12696	MR-Egger intercept	4	-0.0249503	0.0196883	-0.0635387	0.013638	0.20506	3	-0.0370149	0.0220969	-0.0803241	0.00629429	0.0939117	3	-0.0373773	0.023072	-0.0825976	0.00784292	0.105226
X-12704	Inverse-variance weighted	4	-0.024822	0.0313238	-0.0862156	0.0365716	0.428109	3	-0.0343312	0.0372824	-0.107403	0.0387409	0.357133	3	-0.034028	0.0369522	-0.106453	0.0383971	0.357122
X-12704	Weighted median	4	-0.0270677	0.0356089	-0.0968599	0.0427244	0.447171	3	-0.0349208	0.0427794	-0.118767	0.0489254	0.41433	3	-0.0347387	0.0424506	-0.11794	0.048463	0.413168
X-12704	MR-Egger	4	-0.126198	0.463929	-1.03548	0.783087	0.785607	3	-0.0384262	0.538457	-1.09378	1.01693	0.943109	3	-0.0401868	0.557531	-1.13293	1.05255	0.942538
X-12704	MR-Egger intercept	4	0.0143844	0.0656778	-0.114342	0.143111	0.826638	3	0.000565248	0.0741481	-0.144762	0.145893	0.993918	3	0.000857562	0.0774607	-0.150963	0.152678	0.991167
X-12712	Inverse-variance weighted	4	0.128911	0.0491134	0.0326508	0.225172	0.00867079	3	0.146725	0.0591645	0.0307645	0.262685	0.0131402	3	0.145586	0.0586495	0.030635	0.260537	0.0130536
X-12712	Weighted median	4	0.138852	0.0568834	0.0273624	0.250341	0.0146471	3	0.144663	0.0707397	0.00601604	0.28331	0.040854	3	0.143807	0.0701731	0.00627041	0.281344	0.0404308
X-12712	MR-Egger	4	-0.11679	0.730801	-1.54913	1.31555	0.87303	3	-0.459633	0.855043	-2.13549	1.21622	0.590884	3	-0.471452	0.884613	-2.20526	1.26236	0.59407
X-12712	MR-Egger intercept	4	0.0348818	0.103516	-0.168006	0.237769	0.736139	3	0.0838788	0.117997	-0.14739	0.315148	0.477172	3	0.0860888	0.123149	-0.155279	0.327457	0.484514
X-12717	Inverse-variance weighted	4	-0.0140936	0.0422618	-0.0969252	0.068738	0.73877	3	-0.0202462	0.0502447	-0.118724	0.0782316	0.686984	3	-0.0200477	0.0498013	-0.117657	0.0775611	0.687277
X-12717	Weighted median	4	-0.00867753	0.048049	-0.102852	0.0854969	0.856684	3	-0.0227502	0.0577248	-0.135889	0.0903883	0.693496	3	-0.0224068	0.0572813	-0.134676	0.0898625	0.695671
X-12717	MR-Egger	4	-0.191842	0.626017	-1.41881	1.03513	0.759263	3	-0.188523	0.727377	-1.61416	1.23711	0.795495	3	-0.198407	0.752966	-1.67419	1.27738	0.792165
X-12717	MR-Egger intercept	4	0.0252189	0.0886165	-0.148466	0.198904	0.775962	3	0.0232332	0.100186	-0.173128	0.219594	0.816615	3	0.0248396	0.104634	-0.180239	0.229918	0.81235
X-12719	Inverse-variance weighted	4	0.00353708	0.0339011	-0.0629079	0.069982	0.916903	3	-0.00421074	0.0405888	-0.0837632	0.0753418	0.917374	3	-0.0041688	0.0402309	-0.08302	0.0746824	0.917469
X-12719	Weighted median	4	-0.000453857	0.0384796	-0.0758724	0.0749647	0.990589	3	-0.00526383	0.0465142	-0.0964301	0.0859024	0.909899	3	-0.00521967	0.0461446	-0.0956615	0.0852222	0.909939
X-12719	MR-Egger	4	-0.03118	0.503091	-1.01722	0.954861	0.950581	3	-0.0199647	0.591676	-1.17963	1.1397	0.973082	3	-0.0202725	0.612335	-1.22043	1.17988	0.973589
X-12719	MR-Egger intercept	4	0.00491765	0.0711006	-0.134437	0.144272	0.944859	3	0.00217385	0.0814515	-0.157468	0.161816	0.978708	3	0.00224143	0.0850453	-0.164444	0.168927	0.978974
X-12726	Inverse-variance weighted	4	0.0377627	0.0112878	0.0156389	0.0598864	0.000821552	3	0.0363064	0.0137071	0.00944092	0.0631718	0.00807961	3	0.0359575	0.0135784	0.00934425	0.0625707	0.00809379
X-12726	Weighted median	4	0.0383528	0.0131713	0.0125375	0.0641681	0.00359307	3	0.0346596	0.0162373	0.00283514	0.0664842	0.0327961	3	0.034214	0.0160775	0.0027026	0.0657253	0.0333319
X-12726	MR-Egger	4	0.035431	0.177834	-0.313116	0.383978	0.842078	3	0.0910676	0.214182	-0.328722	0.510857	0.6707	3	0.0949531	0.222051	-0.340258	0.530165	0.668928
X-12726	MR-Egger intercept	4	0.000327649	0.0249387	-0.0485512	0.0492065	0.989518	3	-0.00746013	0.0291182	-0.0645308	0.0496106	0.797795	3	-0.00811169	0.030474	-0.0678397	0.0516163	0.790098
X-12728	Inverse-variance weighted	4	0.162162	0.0684195	0.0280619	0.296262	0.0177828	3	0.175201	0.0821058	0.0142764	0.336125	0.0328557	3	0.173804	0.0813736	0.0143144	0.333293	0.0326898
X-12728	Weighted median	4	0.169133	0.0790165	0.014264	0.324003	0.0323158	3	0.164959	0.0990053	-0.0290875	0.359006	0.0956803	3	0.163897	0.0981986	-0.0285691	0.356362	0.095111
X-12728	MR-Egger	4	-0.12703	1.03527	-2.15612	1.90206	0.902343	3	-0.50863	1.20487	-2.87014	1.85288	0.672921	3	-0.51929	1.24739	-2.96413	1.92555	0.67719
X-12728	MR-Egger intercept	4	0.0409734	0.146359	-0.245885	0.327832	0.779515	3	0.0941681	0.165534	-0.230272	0.418608	0.569441	3	0.0962837	0.172917	-0.242627	0.435194	0.57765
X-12729	Inverse-variance weighted	4	0.100276	0.0384962	0.0248244	0.175727	0.00919235	3	0.106215	0.0454627	0.0171101	0.19532	0.0194746	3	0.105427	0.0450633	0.0171049	0.19375	0.0193075
X-12729	Weighted median	4	0.113494	0.0460116	0.0233132	0.203675	0.0136385	3	0.140491	0.0565255	0.0297032	0.251279	0.0129389	3	0.139071	0.0561026	0.0291118	0.24903	0.0131801
X-12729	MR-Egger	4	-0.549157	0.572817	-1.67186	0.573544	0.337712	3	-0.703662	0.659116	-1.9955	0.588181	0.285708	3	-0.731995	0.682133	-2.06895	0.60496	0.283227
X-12729	MR-Egger intercept	4	0.0922447	0.0811784	-0.066862	0.251352	0.255822	3	0.111862	0.0908218	-0.0661454	0.28987	0.218074	3	0.116669	0.0948266	-0.0691876	0.302526	0.218569
X-12734	Inverse-variance weighted	4	0.138857	0.0309247	0.0782457	0.199468	7.11665e-06	3	0.140157	0.0366622	0.0683002	0.212013	0.000131879	3	0.13903	0.0363358	0.0678133	0.210247	0.000130107
X-12734	Weighted median	4	0.147585	0.0376623	0.0737685	0.221402	8.90479e-05	3	0.137433	0.046787	0.0457325	0.229134	0.00330948	3	0.136568	0.0463402	0.0457431	0.227393	0.0032079
X-12734	MR-Egger	4	-0.219867	0.4683	-1.13772	0.697984	0.638711	3	-0.396505	0.543632	-1.462	0.668995	0.46578	3	-0.405851	0.562619	-1.50856	0.696861	0.470687
X-12734	MR-Egger intercept	4	0.0507926	0.0661629	-0.0788843	0.180469	0.442672	3	0.0738458	0.0746347	-0.0724355	0.220127	0.322453	3	0.0756361	0.0779352	-0.077114	0.228386	0.331797
X-12740	Inverse-variance weighted	4	0.0159909	0.0347117	-0.0520428	0.0840246	0.64503	3	0.0129396	0.041122	-0.0676581	0.0935372	0.753018	3	0.0128316	0.0407566	-0.0670499	0.0927132	0.752887
X-12740	Weighted median	4	0.0158628	0.0393491	-0.06126	0.0929856	0.686852	3	0.0145971	0.0474455	-0.0783944	0.107589	0.75834	3	0.0145579	0.047029	-0.0776173	0.106733	0.756902
X-12740	MR-Egger	4	-0.0401693	0.524758	-1.06868	0.988337	0.938983	3	0.0246643	0.60854	-1.16805	1.21738	0.96767	3	0.0277569	0.629764	-1.20656	1.26207	0.964845
X-12740	MR-Egger intercept	4	0.0079544	0.0741628	-0.137402	0.153311	0.914586	3	-0.00161403	0.0835799	-0.165428	0.1622	0.984593	3	-0.00207263	0.0872703	-0.173119	0.168974	0.981052
X-12749	Inverse-variance weighted	4	-0.0157612	0.00777319	-0.0309964	-0.000526001	0.0425978	3	-0.0168806	0.00900563	-0.0345313	0.000770085	0.0608681	3	-0.0167455	0.00892694	-0.034242	0.000750936	0.0606767
X-12749	Weighted median	4	-0.0166544	0.00909791	-0.034486	0.00117713	0.0671633	3	-0.0190216	0.0103237	-0.0392557	0.00121249	0.0653996	3	-0.0189174	0.0102294	-0.0389667	0.00113193	0.0644131
X-12749	MR-Egger	4	0.0516349	0.122101	-0.187678	0.290948	0.672377	3	0.063579	0.13936	-0.209562	0.33672	0.648231	3	0.0659168	0.143931	-0.216182	0.348016	0.64697
X-12749	MR-Egger intercept	4	-0.00953927	0.0172471	-0.043343	0.0242645	0.5802	3	-0.0110552	0.0191081	-0.0485064	0.026396	0.562886	3	-0.0114561	0.0199087	-0.0504765	0.0275644	0.565002
stachydrine	Inverse-variance weighted	4	0.0362638	0.0484645	-0.0587249	0.131252	0.454306	3	0.0410205	0.0572017	-0.0710927	0.153134	0.473299	3	0.0407155	0.0566985	-0.0704116	0.151843	0.472692
stachydrine	Weighted median	4	0.0315997	0.0554795	-0.0771382	0.140338	0.568967	3	0.0468121	0.066147	-0.0828337	0.176458	0.479133	3	0.0463587	0.0656382	-0.0822899	0.175007	0.480017
stachydrine	MR-Egger	4	-0.344546	0.7172	-1.75023	1.06114	0.63094	3	-0.318396	0.824569	-1.93452	1.29773	0.699396	3	-0.333487	0.853566	-2.00644	1.33947	0.69602
stachydrine	MR-Egger intercept	4	0.0541121	0.101679	-0.145176	0.2534	0.594599	3	0.049665	0.113666	-0.173117	0.272447	0.662157	3	0.0521565	0.118708	-0.180506	0.284819	0.660394
isovalerylcarnitine	Inverse-variance weighted	4	-0.0156461	0.0118936	-0.0389571	0.00766483	0.188338	3	-0.0158242	0.0140764	-0.0434134	0.011765	0.260943	3	-0.0156926	0.0139534	-0.0430407	0.0116555	0.26074
isovalerylcarnitine	Weighted median	4	-0.0167819	0.0135663	-0.0433713	0.00980743	0.216074	3	-0.0161723	0.0161403	-0.0478066	0.0154621	0.316352	3	-0.0161069	0.0160126	-0.047491	0.0152771	0.314467
isovalerylcarnitine	MR-Egger	4	-0.0205718	0.174857	-0.363284	0.322141	0.906345	3	-0.0116703	0.201739	-0.407072	0.383731	0.953869	3	-0.0134032	0.208814	-0.422671	0.395865	0.948821
isovalerylcarnitine	MR-Egger intercept	4	0.000700314	0.024803	-0.0479127	0.0493133	0.977475	3	-0.000574826	0.0278489	-0.0551578	0.0540081	0.983532	3	-0.000319537	0.0290797	-0.0573148	0.0566757	0.991233
stearoylcarnitine	Inverse-variance weighted	4	-0.0133471	0.012438	-0.0377251	0.011031	0.283231	3	-0.0149883	0.0149451	-0.04428	0.0143035	0.315914	3	-0.0148489	0.0148092	-0.0438743	0.0141766	0.316016
stearoylcarnitine	Weighted median	4	-0.0138709	0.0142519	-0.041804	0.0140623	0.33042	3	-0.0115975	0.0176806	-0.0462508	0.0230559	0.511861	3	-0.0114811	0.017531	-0.0458413	0.0228791	0.512531
stearoylcarnitine	MR-Egger	4	0.0440578	0.188534	-0.325462	0.413578	0.815229	3	0.00830632	0.221817	-0.426448	0.44306	0.970129	3	0.0104457	0.229798	-0.43995	0.460841	0.963744
stearoylcarnitine	MR-Egger intercept	4	-0.00811014	0.026578	-0.0602021	0.0439818	0.760256	3	-0.00319718	0.0303753	-0.0627316	0.0563373	0.916173	3	-0.00350285	0.0317568	-0.0657451	0.0587394	0.91217
1-stearoylglycerophosphoethanolamine	Inverse-variance weighted	4	0.0199065	0.0128695	-0.00531722	0.0451301	0.121912	3	0.0223477	0.0162267	-0.00945599	0.0541514	0.168444	3	0.0221636	0.0160849	-0.00936218	0.0536893	0.16823
1-stearoylglycerophosphoethanolamine	Weighted median	4	0.019134	0.014704	-0.00968533	0.0479534	0.193163	3	0.0241818	0.0187101	-0.0124893	0.0608529	0.196203	3	0.0238814	0.018544	-0.0124642	0.060227	0.197807
1-stearoylglycerophosphoethanolamine	MR-Egger	4	-0.0559921	0.196288	-0.440709	0.328725	0.775449	3	-0.0575614	0.240704	-0.529333	0.414211	0.810999	3	-0.060391	0.248874	-0.548174	0.427392	0.808271
1-stearoylglycerophosphoethanolamine	MR-Egger intercept	4	0.0107126	0.0276453	-0.0434711	0.0648963	0.698383	3	0.01102	0.0331192	-0.0538924	0.0759323	0.739333	3	0.011483	0.034545	-0.056224	0.0791901	0.739581
1-linoleoylglycerophosphocholine	Inverse-variance weighted	4	-0.0132296	0.00896635	-0.0308033	0.00434413	0.140086	3	-0.0150256	0.0105648	-0.0357323	0.005681	0.154958	3	-0.0149088	0.0104735	-0.0354366	0.00561894	0.154599
1-linoleoylglycerophosphocholine	Weighted median	4	-0.0121207	0.0104078	-0.0325195	0.00827821	0.24419	3	-0.0157241	0.0121637	-0.0395646	0.00811635	0.196113	3	-0.0155609	0.0120685	-0.0392148	0.00809292	0.197265
1-linoleoylglycerophosphocholine	MR-Egger	4	0.0706969	0.130848	-0.18576	0.327154	0.588991	3	0.0690443	0.150289	-0.225517	0.363605	0.64594	3	0.0724041	0.155523	-0.232415	0.377223	0.641535
1-linoleoylglycerophosphocholine	MR-Egger intercept	4	-0.0119554	0.0185956	-0.0484022	0.0244913	0.520278	3	-0.0116618	0.0207958	-0.0524209	0.0290973	0.574951	3	-0.0122147	0.0217075	-0.0547606	0.0303313	0.573644
bradykinin	Inverse-variance weighted	4	0.00498681	0.0373985	-0.0683129	0.0782865	0.893923	3	-0.00814381	0.0447723	-0.0958959	0.0796083	0.855666	3	-0.00802471	0.0443789	-0.0950058	0.0789564	0.856507
bradykinin	Weighted median	4	-0.00841178	0.0430119	-0.0927136	0.0758901	0.844948	3	-0.0157438	0.0516635	-0.117002	0.0855148	0.760566	3	-0.015578	0.051263	-0.116052	0.0848957	0.761217
bradykinin	MR-Egger	4	-0.378521	0.55618	-1.46862	0.711572	0.496142	3	-0.177713	0.647712	-1.4472	1.09178	0.7838	3	-0.180882	0.67038	-1.4948	1.13304	0.787299
bradykinin	MR-Egger intercept	4	0.0544264	0.078753	-0.0999265	0.208779	0.489501	3	0.0234261	0.0892675	-0.151535	0.198387	0.792993	3	0.0240871	0.0932107	-0.158602	0.206777	0.796086
X-12771	Inverse-variance weighted	4	-0.0286413	0.0163182	-0.0606244	0.00334186	0.0792301	3	-0.03129	0.0202653	-0.0710093	0.00842934	0.122585	3	-0.0310202	0.0200882	-0.0703924	0.00835207	0.122541
X-12771	Weighted median	4	-0.0287498	0.0186533	-0.0653097	0.00781009	0.123252	3	-0.0303561	0.0233117	-0.0760462	0.015334	0.192854	3	-0.0299782	0.0231027	-0.0752586	0.0153022	0.194422
X-12771	MR-Egger	4	0.0140524	0.247772	-0.471572	0.499676	0.954772	3	0.00809225	0.29968	-0.579269	0.595454	0.978457	3	0.00924721	0.309878	-0.598103	0.616598	0.976194
X-12771	MR-Egger intercept	4	-0.00603335	0.0349384	-0.0745114	0.0624447	0.862899	3	-0.00543265	0.0412452	-0.0862718	0.0754065	0.895209	3	-0.00560268	0.0430248	-0.0899298	0.0787245	0.896393
X-12776	Inverse-variance weighted	4	-0.0012469	0.00422808	-0.00953377	0.00703998	0.768063	3	-0.00171045	0.00501518	-0.01154	0.00811912	0.733062	3	-0.00170208	0.00497135	-0.0114457	0.00804158	0.732067
X-12776	Weighted median	4	-0.000709365	0.00485299	-0.010221	0.00880232	0.883787	3	-0.00167239	0.00582967	-0.0130983	0.00975355	0.774207	3	-0.00166648	0.0057868	-0.0130084	0.00967545	0.773363
X-12776	MR-Egger	4	0.0339846	0.0617834	-0.0871087	0.155078	0.582278	3	0.0435688	0.0713727	-0.0963191	0.183457	0.54157	3	0.0457472	0.0738942	-0.0990827	0.190577	0.535856
X-12776	MR-Egger intercept	4	-0.0050114	0.00876759	-0.0221956	0.0121728	0.567605	3	-0.00627059	0.00985976	-0.0255954	0.0130542	0.524791	3	-0.00662768	0.0102981	-0.0268116	0.0135562	0.519846
gamma-glutamylisoleucine*	Inverse-variance weighted	4	-0.0145233	0.0115872	-0.0372338	0.00818718	0.210063	3	-0.0152257	0.0135005	-0.0416861	0.0112347	0.259409	3	-0.0151221	0.0133825	-0.0413513	0.0111071	0.258478
gamma-glutamylisoleucine*	Weighted median	4	-0.0165172	0.0133738	-0.0427294	0.00969508	0.216817	3	-0.0148973	0.0156936	-0.0456563	0.0158617	0.342489	3	-0.0148435	0.0155598	-0.0453402	0.0156532	0.340101
gamma-glutamylisoleucine*	MR-Egger	4	0.0908619	0.178575	-0.259139	0.440863	0.610881	3	0.126568	0.204353	-0.273956	0.527093	0.535678	3	0.129676	0.211171	-0.284211	0.543563	0.539162
gamma-glutamylisoleucine*	MR-Egger intercept	4	-0.0149343	0.0252528	-0.0644289	0.0345603	0.554259	3	-0.0195186	0.0280687	-0.0745324	0.0354951	0.486813	3	-0.0201044	0.0292609	-0.0774547	0.0372459	0.492037
X-12786	Inverse-variance weighted	4	0.0245069	0.0159585	-0.00677108	0.0557849	0.124619	3	0.0230611	0.0191737	-0.0145186	0.0606409	0.229073	3	0.0229339	0.0190061	-0.0143174	0.0601852	0.227564
X-12786	Weighted median	4	0.0340668	0.0189429	-0.00306053	0.0711942	0.072114	3	0.0274062	0.0238438	-0.0193269	0.0741393	0.25039	3	0.0274209	0.0236433	-0.0189191	0.0737609	0.24614
X-12786	MR-Egger	4	-0.232561	0.235358	-0.693854	0.228733	0.323097	3	-0.344864	0.282386	-0.89833	0.208601	0.22199	3	-0.355631	0.292031	-0.928001	0.216739	0.223305
X-12786	MR-Egger intercept	4	0.0363235	0.0331794	-0.028707	0.101354	0.273622	3	0.0507738	0.0388793	-0.0254283	0.126976	0.191575	3	0.0526927	0.0405618	-0.026807	0.132192	0.193919
X-12798	Inverse-variance weighted	4	-0.0913953	0.0127922	-0.116468	-0.066323	9.02509e-13	3	-0.0980308	0.0153656	-0.128147	-0.0679148	1.77217e-10	3	-0.0971246	0.015226	-0.126967	-0.0672821	1.78423e-10
X-12798	Weighted median	4	-0.0930775	0.0165998	-0.125612	-0.0605426	2.05673e-08	3	-0.0993016	0.0202907	-0.139071	-0.0595326	9.88349e-07	3	-0.0984116	0.0201025	-0.137812	-0.0590114	9.80591e-07
X-12798	MR-Egger	4	-0.123828	0.193696	-0.503465	0.255809	0.522633	3	-0.159463	0.227757	-0.605858	0.286932	0.483835	3	-0.164407	0.235946	-0.626853	0.29804	0.48593
X-12798	MR-Egger intercept	4	0.00458287	0.0273102	-0.0489441	0.0581098	0.866734	3	0.00843353	0.0311956	-0.0527087	0.0695757	0.786896	3	0.00931944	0.0326135	-0.0546019	0.0732408	0.775067
X-12816	Inverse-variance weighted	4	0.0282878	0.0304744	-0.031441	0.0880165	0.35328	3	0.0200287	0.0359791	-0.050489	0.0905464	0.577748	3	0.0199047	0.0356616	-0.0499907	0.0898001	0.576738
X-12816	Weighted median	4	0.0264522	0.0351478	-0.0424362	0.0953405	0.451691	3	0.00949177	0.042242	-0.073301	0.0922845	0.822213	3	0.00945463	0.0419072	-0.0726819	0.0915912	0.821506
X-12816	MR-Egger	4	-0.130227	0.457171	-1.02627	0.765813	0.775756	3	-0.139908	0.526262	-1.17136	0.891547	0.790353	3	-0.139795	0.544609	-1.20721	0.927619	0.797419
X-12816	MR-Egger intercept	4	0.0224939	0.0647302	-0.104375	0.149363	0.728214	3	0.0220592	0.0724147	-0.119871	0.163989	0.760653	3	0.0222183	0.0756065	-0.125968	0.170404	0.768859
X-12830	Inverse-variance weighted	4	0.0259375	0.0224985	-0.0181587	0.0700337	0.24897	3	0.0238398	0.0269898	-0.0290592	0.0767389	0.377079	3	0.0236224	0.0267539	-0.0288144	0.0760592	0.377263
X-12830	Weighted median	4	0.0262001	0.0254999	-0.0237788	0.0761789	0.304204	3	0.0253453	0.0308803	-0.0351789	0.0858696	0.411783	3	0.0251919	0.0306466	-0.0348743	0.0852581	0.411069
X-12830	MR-Egger	4	0.0162214	0.330856	-0.632245	0.664688	0.960897	3	0.0476983	0.394927	-0.726344	0.821741	0.903867	3	0.0483116	0.408497	-0.752329	0.848952	0.905856
X-12830	MR-Egger intercept	4	0.00137428	0.0466894	-0.0901352	0.0928837	0.976518	3	-0.00329456	0.0544069	-0.10993	0.103341	0.951714	3	-0.00343867	0.0567726	-0.114711	0.107834	0.951702
X-12833	Inverse-variance weighted	4	-0.284642	0.0871887	-0.455528	-0.113755	0.00109595	3	-0.269294	0.104137	-0.473399	-0.065189	0.00971096	3	-0.266997	0.103213	-0.469291	-0.0647027	0.00968582
X-12833	Weighted median	4	-0.275117	0.102176	-0.475379	-0.0748555	0.00709025	3	-0.265934	0.122329	-0.505694	-0.0261746	0.0297101	3	-0.263903	0.121215	-0.50148	-0.0263267	0.029469
X-12833	MR-Egger	4	-0.0288521	1.31818	-2.61244	2.55474	0.982537	3	0.134859	1.53818	-2.87991	3.14963	0.930135	3	0.135905	1.5918	-2.98397	3.25578	0.931961
X-12833	MR-Egger intercept	4	-0.0362198	0.186246	-0.401254	0.328815	0.845805	3	-0.0556535	0.211327	-0.469846	0.358539	0.792279	3	-0.0559672	0.220652	-0.488438	0.376504	0.79977
X-12844	Inverse-variance weighted	4	0.000721812	0.0116272	-0.0220671	0.0235107	0.950499	3	-0.00192596	0.0137917	-0.0289573	0.0251053	0.88894	3	-0.00188447	0.0136712	-0.0286795	0.0249106	0.890365
X-12844	Weighted median	4	0.000689955	0.013385	-0.0255442	0.0269241	0.95889	3	-0.00396822	0.0160067	-0.0353407	0.0274043	0.804204	3	-0.00389474	0.0158882	-0.035035	0.0272455	0.806352
X-12844	MR-Egger	4	-0.0710475	0.169904	-0.404054	0.261959	0.675829	3	-0.0975766	0.196275	-0.482268	0.287115	0.619089	3	-0.1	0.203209	-0.498282	0.298282	0.622645
X-12844	MR-Egger intercept	4	0.0102086	0.0241109	-0.0370479	0.0574651	0.672001	3	0.0132464	0.0271143	-0.0398968	0.0663895	0.625169	3	0.0137047	0.0283198	-0.041801	0.0692104	0.628437
X-12847	Inverse-variance weighted	4	0.025392	0.0232154	-0.0201094	0.0708934	0.274062	3	0.0255597	0.0286681	-0.0306287	0.0817481	0.372621	3	0.0252824	0.0284175	-0.0304149	0.0809798	0.373639
X-12847	Weighted median	4	0.0253559	0.0263972	-0.0263817	0.0770935	0.336777	3	0.036659	0.0334156	-0.0288344	0.102152	0.272615	3	0.036438	0.0331721	-0.0285781	0.101454	0.272007
X-12847	MR-Egger	4	0.0959088	0.348546	-0.587229	0.779046	0.783187	3	0.19366	0.418733	-0.627041	1.01436	0.643729	3	0.195433	0.433146	-0.653517	1.04438	0.651849
X-12847	MR-Egger intercept	4	-0.00997825	0.0492103	-0.106429	0.0864722	0.839317	3	-0.0232166	0.0576963	-0.136299	0.0898659	0.687394	3	-0.0237024	0.0602083	-0.141709	0.0943037	0.693822
X-12850	Inverse-variance weighted	4	-0.103752	0.0209717	-0.144855	-0.0626478	7.52795e-07	3	-0.108443	0.0245762	-0.156612	-0.060275	1.02167e-05	3	-0.107525	0.0243624	-0.155274	-0.0597751	1.01693e-05
X-12850	Weighted median	4	-0.101613	0.0254889	-0.15157	-0.0516555	6.70408e-05	3	-0.104701	0.0298075	-0.163123	-0.0462794	0.000443792	3	-0.103857	0.0295404	-0.161755	-0.0459585	0.000438516
X-12850	MR-Egger	4	-0.0221628	0.314631	-0.638828	0.594502	0.943843	3	-0.0161832	0.360638	-0.72302	0.690654	0.964208	3	-0.0184423	0.372913	-0.749339	0.712454	0.960557
X-12850	MR-Egger intercept	4	-0.011589	0.0445913	-0.0989864	0.0758084	0.794946	3	-0.0127437	0.0496983	-0.11015	0.0846631	0.797626	3	-0.0124104	0.0518409	-0.114017	0.0891959	0.810801
laurylcarnitine	Inverse-variance weighted	4	-0.0336932	0.0180832	-0.0691357	0.00174929	0.0624301	3	-0.0385188	0.0216948	-0.08104	0.00400226	0.075818	3	-0.0382234	0.0215053	-0.0803729	0.00392611	0.0755027
laurylcarnitine	Weighted median	4	-0.0342683	0.0206931	-0.074826	0.00628932	0.0977158	3	-0.0364126	0.0254226	-0.0862401	0.0134149	0.152061	3	-0.0361926	0.025216	-0.085615	0.0132298	0.151201
laurylcarnitine	MR-Egger	4	0.0719414	0.26625	-0.449899	0.593782	0.787004	3	0.137542	0.318102	-0.485927	0.761011	0.665463	3	0.140529	0.329012	-0.504323	0.78538	0.66929
laurylcarnitine	MR-Egger intercept	4	-0.0149377	0.0375632	-0.0885602	0.0586848	0.690875	3	-0.0243069	0.0438148	-0.110182	0.0615685	0.579056	3	-0.0248913	0.045717	-0.114495	0.0647124	0.586122
X-12851	Inverse-variance weighted	4	-0.0338937	0.0357449	-0.103952	0.0361649	0.343021	3	-0.0328131	0.0434432	-0.11796	0.052334	0.450063	3	-0.0325803	0.0430646	-0.116985	0.0518246	0.449322
X-12851	Weighted median	4	-0.0288229	0.0406929	-0.108579	0.0509337	0.478758	3	-0.029178	0.0496293	-0.12645	0.0680937	0.556587	3	-0.0290326	0.0492446	-0.12555	0.0674851	0.555487
X-12851	MR-Egger	4	0.0112491	0.531182	-1.02985	1.05235	0.983104	3	0.184761	0.628495	-1.04707	1.41659	0.768778	3	0.188866	0.650246	-1.08559	1.46333	0.771469
X-12851	MR-Egger intercept	4	-0.00640111	0.0751492	-0.153691	0.140889	0.932119	3	-0.0300892	0.0867094	-0.200036	0.139858	0.728582	3	-0.030888	0.0904989	-0.208263	0.146487	0.732872
X-12855	Inverse-variance weighted	4	0.00701014	0.0157047	-0.0237706	0.0377909	0.655329	3	0.00940965	0.0188591	-0.0275536	0.0463729	0.617819	3	0.00932412	0.018688	-0.0273036	0.0459519	0.617824
X-12855	Weighted median	4	0.00501426	0.0177979	-0.029869	0.0398976	0.778148	3	0.00622129	0.0220688	-0.0370329	0.0494754	0.778017	3	0.00617372	0.0218829	-0.0367161	0.0490635	0.777848
X-12855	MR-Egger	4	0.0081329	0.237596	-0.457546	0.473812	0.972694	3	-0.0213804	0.279248	-0.568696	0.525935	0.93897	3	-0.0236239	0.289284	-0.590611	0.543363	0.934914
X-12855	MR-Egger intercept	4	-0.00015867	0.0335043	-0.0658259	0.0655085	0.996221	3	0.00422768	0.038255	-0.0707508	0.0792062	0.912003	3	0.00456453	0.039993	-0.0738203	0.0829493	0.909132
X-12990	Inverse-variance weighted	4	-0.0193038	0.0196593	-0.0578354	0.0192278	0.326141	3	-0.0170114	0.0232947	-0.0626682	0.0286454	0.465226	3	-0.0168712	0.0230901	-0.0621269	0.0283845	0.464981
X-12990	Weighted median	4	-0.0170625	0.0223273	-0.0608233	0.0266983	0.44475	3	-0.0156173	0.0265763	-0.0677058	0.0364712	0.556774	3	-0.0154955	0.0263673	-0.0671745	0.0361834	0.556747
X-12990	MR-Egger	4	0.001273	0.290714	-0.568516	0.571062	0.996506	3	0.0166538	0.335993	-0.641881	0.675188	0.960468	3	0.0166766	0.347783	-0.664966	0.698319	0.961755
X-12990	MR-Egger intercept	4	-0.00292258	0.0411964	-0.083666	0.0778209	0.943443	3	-0.00465237	0.0463209	-0.0954396	0.0861349	0.919997	3	-0.0046763	0.0483713	-0.0994822	0.0901296	0.922984
isovalerate	Inverse-variance weighted	4	0.0279899	0.0116099	0.00523491	0.050745	0.0159148	3	0.0353292	0.0136583	0.00855931	0.062099	0.00969176	3	0.0350314	0.013539	0.00849551	0.0615673	0.00966892
isovalerate	Weighted median	4	0.0317592	0.0135205	0.0052595	0.0582588	0.0188256	3	0.0347823	0.0159964	0.00342996	0.0661347	0.0296763	3	0.0345182	0.0158621	0.00342905	0.0656074	0.0295446
isovalerate	MR-Egger	4	0.00385701	0.17178	-0.332826	0.34054	0.982086	3	-0.0104912	0.195791	-0.394235	0.373252	0.957267	3	-0.0104646	0.202656	-0.407663	0.386733	0.958818
isovalerate	MR-Egger intercept	4	0.00343526	0.0243966	-0.0443811	0.0512516	0.888021	3	0.00634055	0.0270272	-0.0466319	0.059313	0.81452	3	0.00634988	0.0282215	-0.0489633	0.061663	0.821978
X-13069	Inverse-variance weighted	4	-0.0119734	0.0152693	-0.0419007	0.0179538	0.432951	3	-0.0114267	0.0190248	-0.0487145	0.0258612	0.548093	3	-0.0113141	0.0188595	-0.0482781	0.0256498	0.548561
X-13069	Weighted median	4	-0.0121241	0.0173537	-0.0461368	0.0218886	0.484773	3	-0.00795279	0.021774	-0.0506291	0.0347235	0.71493	3	-0.0078076	0.0216116	-0.0501655	0.0345503	0.717898
X-13069	MR-Egger	4	-0.0831125	0.229809	-0.533529	0.367305	0.717607	3	-0.0890655	0.278423	-0.634765	0.456634	0.74905	3	-0.0924985	0.287906	-0.656783	0.471786	0.747998
X-13069	MR-Egger intercept	4	0.0100621	0.0324331	-0.0535055	0.0736298	0.756376	3	0.0107288	0.038385	-0.0645044	0.085962	0.779857	3	0.0113149	0.0400401	-0.0671623	0.0897921	0.777492
X-13183	Inverse-variance weighted	4	-0.0714817	0.0225504	-0.11568	-0.0272836	0.00152514	3	-0.0798031	0.0266405	-0.132017	-0.0275887	0.00273943	3	-0.0790661	0.0264066	-0.130822	-0.0273102	0.00275181
X-13183	Weighted median	4	-0.0740151	0.0267888	-0.12652	-0.02151	0.00572881	3	-0.0845446	0.0319195	-0.147106	-0.0219834	0.00808071	3	-0.0840307	0.0316826	-0.146127	-0.021934	0.00799527
X-13183	MR-Egger	4	-0.113825	0.334004	-0.768461	0.540811	0.733263	3	-0.16576	0.383573	-0.917549	0.586029	0.665634	3	-0.167405	0.397044	-0.945597	0.610788	0.673297
X-13183	MR-Egger intercept	4	0.00601904	0.04737	-0.0868244	0.0988625	0.898889	3	0.011882	0.0528938	-0.091788	0.115552	0.822261	3	0.0123169	0.0552364	-0.0959446	0.120578	0.823548
X-13215	Inverse-variance weighted	4	0.0186798	0.00951317	3.43598e-05	0.0373253	0.0495793	3	0.0191194	0.0112841	-0.00299715	0.0412359	0.0901975	3	0.0189847	0.0111855	-0.0029385	0.040908	0.0896479
X-13215	Weighted median	4	0.0220193	0.0111251	0.000214386	0.0438241	0.0477896	3	0.0201928	0.0134418	-0.00615256	0.0465382	0.133034	3	0.0201263	0.0133397	-0.00601905	0.0462716	0.131363
X-13215	MR-Egger	4	-0.0644658	0.139013	-0.336926	0.207994	0.642834	3	-0.12511	0.160589	-0.439858	0.189638	0.435937	3	-0.129011	0.166262	-0.454879	0.196856	0.437778
X-13215	MR-Egger intercept	4	0.0118268	0.0197271	-0.0268376	0.0504912	0.548826	3	0.0199739	0.0221845	-0.0235068	0.0634547	0.367931	3	0.0206719	0.0231707	-0.0247418	0.0660857	0.372308
7-methylguanine	Inverse-variance weighted	4	-0.0168101	0.0120032	-0.040336	0.00671584	0.161375	3	-0.0137105	0.0143931	-0.0419204	0.0144994	0.340803	3	-0.0135845	0.014263	-0.0415395	0.0143705	0.340881
7-methylguanine	Weighted median	4	-0.014141	0.0137489	-0.0410883	0.0128063	0.303705	3	-0.0139795	0.0167836	-0.0468747	0.0189157	0.404886	3	-0.0137886	0.0166574	-0.0464364	0.0188593	0.407798
7-methylguanine	MR-Egger	4	-0.0483371	0.180753	-0.402606	0.305932	0.789145	3	-0.0332167	0.211908	-0.448549	0.382115	0.875442	3	-0.0348232	0.219506	-0.465048	0.395402	0.87395
7-methylguanine	MR-Egger intercept	4	0.00445888	0.0255075	-0.0455348	0.0544526	0.861231	3	0.00268107	0.029059	-0.0542735	0.0596356	0.926489	3	0.00294525	0.0303754	-0.0565895	0.06248	0.922757
phenylacetylglutamine	Inverse-variance weighted	4	-0.0179016	0.0187116	-0.0545756	0.0187724	0.338711	3	-0.0251049	0.0223542	-0.0689183	0.0187085	0.261416	3	-0.0248889	0.0221535	-0.068309	0.0185313	0.261237
phenylacetylglutamine	Weighted median	4	-0.0164234	0.0213068	-0.058184	0.0253373	0.440824	3	-0.026209	0.0259775	-0.077124	0.0247061	0.313018	3	-0.0258906	0.025783	-0.0764243	0.0246431	0.315295
phenylacetylglutamine	MR-Egger	4	-0.00751284	0.281207	-0.558668	0.543642	0.978686	3	0.0399257	0.328371	-0.603669	0.68352	0.903226	3	0.0421655	0.340056	-0.624331	0.708662	0.901318
phenylacetylglutamine	MR-Egger intercept	4	-0.00147049	0.0397155	-0.0793113	0.0763704	0.970465	3	-0.00894725	0.0450741	-0.097291	0.0793965	0.842653	3	-0.00930743	0.0471009	-0.101623	0.0830086	0.843353
pro-hydroxy-pro	Inverse-variance weighted	4	-0.0119066	0.0108363	-0.0331453	0.0093321	0.271868	3	-0.0113182	0.0128222	-0.0364493	0.0138128	0.377395	3	-0.0112337	0.0127101	-0.0361451	0.0136777	0.376783
pro-hydroxy-pro	Weighted median	4	-0.0128419	0.0123427	-0.0370332	0.0113494	0.298133	3	-0.0117544	0.0146356	-0.0404397	0.0169308	0.421894	3	-0.0117008	0.0145229	-0.0401653	0.0167636	0.420427
pro-hydroxy-pro	MR-Egger	4	0.0484355	0.15941	-0.264003	0.360874	0.761248	3	0.053651	0.183895	-0.306777	0.414078	0.770479	3	0.0552775	0.190339	-0.317781	0.428336	0.771498
pro-hydroxy-pro	MR-Egger intercept	4	-0.00857886	0.022611	-0.0528956	0.0357379	0.704383	3	-0.00898986	0.0253838	-0.0587413	0.0407615	0.723221	3	-0.0092825	0.026505	-0.0612314	0.0426664	0.726176
N2	Inverse-variance weighted	4	-0.0387028	0.00727064	-0.052953	-0.0244526	1.01979e-07	3	-0.0392801	0.00983935	-0.0585648	-0.0199953	6.54789e-05	3	-0.0389428	0.00975338	-0.058059	-0.0198265	6.53126e-05
N2	Weighted median	4	-0.0381173	0.00903918	-0.0558338	-0.0204009	2.47682e-05	3	-0.0382831	0.0115567	-0.0609338	-0.0156324	0.000924224	3	-0.0380404	0.0114454	-0.060473	-0.0156078	0.000888506
N2	MR-Egger	4	-0.0123384	0.117942	-0.2435	0.218823	0.916682	3	-0.0263782	0.155935	-0.332006	0.279249	0.86567	3	-0.0283115	0.160963	-0.343794	0.287171	0.860382
N2	MR-Egger intercept	4	-0.00369224	0.0164859	-0.036004	0.0286195	0.822786	3	-0.00176944	0.0213433	-0.0436016	0.0400627	0.933928	3	-0.00147066	0.0222257	-0.0450322	0.0420909	0.947243
cysteine-glutathione disulfide	Inverse-variance weighted	4	-0.0366296	0.0225809	-0.0808873	0.00762809	0.104771	3	-0.0459277	0.0271875	-0.0992143	0.00735895	0.0911638	3	-0.0455557	0.0269489	-0.0983746	0.00726317	0.0909424
cysteine-glutathione disulfide	Weighted median	4	-0.0380578	0.0258617	-0.0887459	0.0126303	0.141132	3	-0.0450694	0.0313695	-0.106553	0.0164137	0.150796	3	-0.0447676	0.031126	-0.105773	0.0162382	0.150357
cysteine-glutathione disulfide	MR-Egger	4	0.045126	0.337343	-0.616055	0.706307	0.893585	3	0.0885367	0.394486	-0.684642	0.861716	0.822418	3	0.090577	0.408235	-0.709549	0.890703	0.824411
cysteine-glutathione disulfide	MR-Egger intercept	4	-0.0115974	0.0477462	-0.105178	0.0819835	0.808086	3	-0.0185731	0.0543595	-0.125116	0.0879695	0.732598	3	-0.0189663	0.0567522	-0.130199	0.0922659	0.738232
oleoylcarnitine	Inverse-variance weighted	4	-0.0141474	0.0144459	-0.0424609	0.0141661	0.327414	3	-0.0182603	0.0171352	-0.0518447	0.0153241	0.286577	3	-0.0181229	0.0169854	-0.0514137	0.015168	0.285988
oleoylcarnitine	Weighted median	4	-0.0132953	0.0166128	-0.0458558	0.0192652	0.423534	3	-0.0218254	0.0196503	-0.0603392	0.0166884	0.2667	3	-0.0216067	0.0195014	-0.0598288	0.0166154	0.267881
oleoylcarnitine	MR-Egger	4	0.0940381	0.211093	-0.319697	0.507773	0.655972	3	0.104104	0.243857	-0.373846	0.582055	0.669447	3	0.108531	0.252472	-0.386305	0.603367	0.667288
oleoylcarnitine	MR-Egger intercept	4	-0.0153885	0.0299559	-0.0741011	0.0433241	0.607458	3	-0.0169459	0.0336875	-0.0829722	0.0490804	0.614941	3	-0.0176909	0.0351852	-0.0866526	0.0512708	0.615109
1-arachidonoylglycerophosphoethanolamine*	Inverse-variance weighted	4	0.0104017	0.00966967	-0.00855055	0.0293539	0.282062	3	0.00788227	0.0116898	-0.0150293	0.0307938	0.500129	3	0.00782983	0.0115815	-0.0148695	0.0305292	0.499001
1-arachidonoylglycerophosphoethanolamine*	Weighted median	4	0.0106854	0.0111422	-0.011153	0.0325237	0.33756	3	0.00366522	0.0139286	-0.0236343	0.0309647	0.792439	3	0.0037347	0.0137872	-0.0232876	0.030757	0.786481
1-arachidonoylglycerophosphoethanolamine*	MR-Egger	4	-0.0474974	0.149722	-0.340947	0.245953	0.751064	3	-0.0630773	0.178342	-0.41262	0.286466	0.723573	3	-0.0635281	0.18483	-0.425789	0.298732	0.731064
1-arachidonoylglycerophosphoethanolamine*	MR-Egger intercept	4	0.00815438	0.0210425	-0.0330882	0.049397	0.698372	3	0.00969748	0.0243201	-0.0379691	0.0573641	0.690082	3	0.00984127	0.0254406	-0.0400214	0.0597039	0.69888
X-13429	Inverse-variance weighted	4	-0.10344	0.0238287	-0.150143	-0.0567365	1.41848e-05	3	-0.109837	0.0286681	-0.166025	-0.0536485	0.000127451	3	-0.108895	0.0284175	-0.164592	-0.0531973	0.00012713
X-13429	Weighted median	4	-0.102062	0.0284299	-0.157784	-0.0463406	0.000330731	3	-0.106666	0.0342545	-0.173803	-0.0395281	0.0018462	3	-0.106061	0.0339679	-0.172637	-0.039485	0.00179392
X-13429	MR-Egger	4	-0.0524378	0.349262	-0.736978	0.632102	0.880655	3	-0.0599446	0.418733	-0.880646	0.760756	0.886166	3	-0.063951	0.433146	-0.912901	0.784999	0.882624
X-13429	MR-Egger intercept	4	-0.00721144	0.0492689	-0.103777	0.0893538	0.88363	3	-0.00689072	0.0576963	-0.119973	0.106192	0.904934	3	-0.00626078	0.0602083	-0.124267	0.111745	0.917181
X-13431	Inverse-variance weighted	4	-0.0272789	0.0180969	-0.0627481	0.0081903	0.131713	3	-0.0358966	0.021662	-0.0783533	0.00656021	0.0974952	3	-0.035558	0.0214673	-0.0776332	0.00651718	0.0976453
X-13431	Weighted median	4	-0.0243689	0.0208647	-0.065263	0.0165251	0.242826	3	-0.0322075	0.0254017	-0.081994	0.017579	0.204825	3	-0.0317462	0.0252115	-0.0811599	0.0176675	0.20796
X-13431	MR-Egger	4	-0.140388	0.271055	-0.671646	0.390869	0.604505	3	-0.123926	0.316882	-0.745003	0.49715	0.695737	3	-0.128807	0.328214	-0.772094	0.51448	0.694727
X-13431	MR-Egger intercept	4	0.0160117	0.0382848	-0.059025	0.0910484	0.675781	3	0.0121143	0.0435059	-0.0731557	0.0973843	0.780666	3	0.0129463	0.0454704	-0.0761739	0.102067	0.775859
X-13435	Inverse-variance weighted	4	-0.0259222	0.012246	-0.0499239	-0.00192049	0.0342777	3	-0.0259379	0.0144944	-0.0543465	0.00247068	0.0735333	3	-0.0257202	0.0143678	-0.0538805	0.00244012	0.0734328
X-13435	Weighted median	4	-0.0262326	0.0140491	-0.0537683	0.00130312	0.0618724	3	-0.0263667	0.0166164	-0.0589343	0.00620088	0.112561	3	-0.0261784	0.0164839	-0.0584863	0.00612953	0.11226
X-13435	MR-Egger	4	0.0196666	0.180005	-0.333137	0.372471	0.913	3	0.0157131	0.207687	-0.391346	0.422772	0.939691	3	0.0161444	0.214972	-0.405193	0.437482	0.940135
X-13435	MR-Egger intercept	4	-0.00648176	0.0255337	-0.0565268	0.0435633	0.79961	3	-0.00576386	0.0286706	-0.0619573	0.0504296	0.84067	3	-0.00584331	0.029938	-0.0645207	0.0528341	0.845252
X-13477	Inverse-variance weighted	4	0.00516623	0.0108363	-0.0160724	0.0264049	0.633537	3	0.00481756	0.0128222	-0.0203135	0.0299486	0.707125	3	0.00477837	0.0127101	-0.020133	0.0296898	0.706954
X-13477	Weighted median	4	0.00184255	0.0125781	-0.02281	0.0264951	0.883535	3	-0.0025577	0.0152432	-0.0324338	0.0273184	0.866746	3	-0.00251849	0.0151317	-0.0321761	0.0271391	0.867813
X-13477	MR-Egger	4	-0.0806813	0.15941	-0.39312	0.231757	0.61277	3	-0.0767133	0.183895	-0.437141	0.283714	0.676563	3	-0.0824887	0.190339	-0.455547	0.29057	0.664741
X-13477	MR-Egger intercept	4	0.012205	0.022611	-0.0321118	0.0565217	0.589348	3	0.0112815	0.0253838	-0.0384699	0.0610329	0.656727	3	0.0121793	0.026505	-0.0397696	0.0641281	0.64587
2-palmitoylglycerophosphocholine*	Inverse-variance weighted	4	0.0067596	0.0098561	-0.012558	0.0260772	0.492821	3	-0.000337239	0.0125156	-0.0248674	0.0241929	0.978503	3	-0.000342854	0.0124071	-0.0246604	0.0239746	0.977954
2-palmitoylglycerophosphocholine*	Weighted median	4	0.00366576	0.0116608	-0.0191889	0.0265204	0.753242	3	-0.0012582	0.0141961	-0.029082	0.0265655	0.929376	3	-0.00126101	0.0140702	-0.0288381	0.0263161	0.928587
2-palmitoylglycerophosphocholine*	MR-Egger	4	0.0729888	0.152245	-0.225407	0.371384	0.631643	3	0.0690697	0.188367	-0.300122	0.438262	0.71386	3	0.0722847	0.194595	-0.309115	0.453685	0.710294
2-palmitoylglycerophosphocholine*	MR-Egger intercept	4	-0.00933861	0.0214222	-0.0513254	0.0326482	0.662887	3	-0.00956821	0.0259102	-0.0603513	0.0412149	0.711917	3	-0.010098	0.0270011	-0.0630191	0.0428232	0.708416
2-oleoylglycerophosphocholine*	Inverse-variance weighted	4	-0.0197227	0.011004	-0.0412902	0.00184483	0.0730827	3	-0.0207908	0.0128457	-0.0459679	0.00438636	0.105555	3	-0.0206119	0.0127335	-0.045569	0.00434526	0.105508
2-oleoylglycerophosphocholine*	Weighted median	4	-0.0203609	0.0128557	-0.0455576	0.00483587	0.113239	3	-0.0179988	0.0147679	-0.0469434	0.0109458	0.22293	3	-0.0178076	0.0146355	-0.0464925	0.0108774	0.223703
2-oleoylglycerophosphocholine*	MR-Egger	4	0.0778749	0.168536	-0.252449	0.408199	0.644033	3	0.0333166	0.193044	-0.345042	0.411675	0.862977	3	0.036132	0.199523	-0.354925	0.427189	0.856295
2-oleoylglycerophosphocholine*	MR-Egger intercept	4	-0.0138363	0.0238422	-0.0605661	0.0328935	0.561692	3	-0.00745289	0.0265314	-0.0594535	0.0445477	0.778781	3	-0.00788355	0.0276636	-0.0621032	0.0463361	0.77566
2-stearoylglycerophosphocholine*	Inverse-variance weighted	4	-0.0527457	0.0132383	-0.0786924	-0.0267991	6.7674e-05	3	-0.0568063	0.0157851	-0.0877444	-0.0258681	0.000319767	3	-0.0563102	0.015644	-0.0869718	-0.0256486	0.000318845
2-stearoylglycerophosphocholine*	Weighted median	4	-0.0528053	0.0160807	-0.0843228	-0.0212877	0.00102428	3	-0.0539934	0.0195259	-0.0922635	-0.0157233	0.00568854	3	-0.0533213	0.0193662	-0.0912782	-0.0153643	0.00589938
2-stearoylglycerophosphocholine*	MR-Egger	4	0.109946	0.198543	-0.279191	0.499084	0.57974	3	0.0635034	0.231325	-0.389885	0.516892	0.783685	3	0.0685491	0.239525	-0.400912	0.53801	0.774735
2-stearoylglycerophosphocholine*	MR-Egger intercept	4	-0.0230412	0.0280561	-0.0780301	0.0319477	0.4115	3	-0.0165645	0.031775	-0.0788423	0.0457134	0.602154	3	-0.0173425	0.0331982	-0.0824098	0.0477248	0.601397
2-linoleoylglycerophosphocholine*	Inverse-variance weighted	4	0.014583	0.0117863	-0.00851771	0.0376837	0.215982	3	0.011656	0.0139094	-0.0156059	0.038918	0.402033	3	0.0115646	0.013789	-0.0154613	0.0385904	0.401647
2-linoleoylglycerophosphocholine*	Weighted median	4	0.0140733	0.0136308	-0.0126426	0.0407893	0.301855	3	0.0115264	0.0160134	-0.0198594	0.0429121	0.471652	3	0.0114884	0.0158898	-0.0196551	0.0426319	0.469679
2-linoleoylglycerophosphocholine*	MR-Egger	4	0.00523297	0.172047	-0.331974	0.342439	0.975735	3	-2.2962e-05	0.197878	-0.387856	0.38781	0.999907	3	0.00154232	0.204792	-0.399844	0.402928	0.993991
2-linoleoylglycerophosphocholine*	MR-Egger intercept	4	0.00133145	0.0244422	-0.0465744	0.0492373	0.956558	3	0.00161943	0.0273701	-0.052025	0.0552639	0.952819	3	0.00140155	0.0285741	-0.0546026	0.0574057	0.96088
X-13496	Inverse-variance weighted	4	0.0159779	0.00634211	0.00354761	0.0284082	0.0117576	3	0.0141071	0.00752277	-0.00063726	0.0288514	0.0607579	3	0.014009	0.00745702	-0.000606462	0.0286245	0.0602942
X-13496	Weighted median	4	0.0189559	0.00774868	0.00376875	0.034143	0.0144316	3	0.0191979	0.00912234	0.00131844	0.0370774	0.0353355	3	0.0190182	0.00905483	0.00127109	0.0367654	0.0356988
X-13496	MR-Egger	4	-0.115992	0.0926751	-0.297632	0.0656478	0.210716	3	-0.116534	0.107059	-0.326366	0.0932976	0.276372	3	-0.121106	0.110841	-0.338351	0.096139	0.274567
X-13496	MR-Egger intercept	4	0.0187717	0.0131514	-0.00700457	0.0445479	0.153478	3	0.0180921	0.0147896	-0.010895	0.0470793	0.221217	3	0.0188727	0.0154471	-0.0114031	0.0491486	0.221797
1-palmitoylglycerophosphoinositol*	Inverse-variance weighted	4	0.0307546	0.0147128	0.00191799	0.0595913	0.0365886	3	0.0315208	0.0174206	-0.00262297	0.0656646	0.0703893	3	0.0312648	0.0172684	-0.00258063	0.0651102	0.070215
1-palmitoylglycerophosphoinositol*	Weighted median	4	0.0280869	0.01694	-0.0051149	0.0612888	0.097313	3	0.0329451	0.0202251	-0.00669545	0.0725856	0.10333	3	0.0327423	0.0200614	-0.00657724	0.0720619	0.102657
1-palmitoylglycerophosphoinositol*	MR-Egger	4	-0.0821059	0.216047	-0.505549	0.341338	0.703917	3	-0.0602168	0.249323	-0.548881	0.428447	0.809151	3	-0.0621867	0.258079	-0.568012	0.443639	0.809586
1-palmitoylglycerophosphoinositol*	MR-Egger intercept	4	0.0160476	0.0306483	-0.0440219	0.0761171	0.600553	3	0.0126967	0.0344225	-0.0547701	0.0801635	0.71224	3	0.0130453	0.0359455	-0.0574067	0.0834972	0.716667
[truncated: 249 more rows]

## Sheet: Supplementary Table 9
Supplementary Table 9. The overall Mendelian Randomization results between metabolites and eBMD.
[truncated: 559 more rows]
