# Supplementary material for: Causal Gut Microbiota-Bone Links: Pleiotropic Effects and Stearidonate Mediation
Source: Research Square preprint supplement (doi:10.21203/rs.3.rs-6281295/v1), 2025-04-01
Supplement: Supplementary file 2 [file 720612fc2664e6e8b4d955f4.docx]

Supplementary Figures:


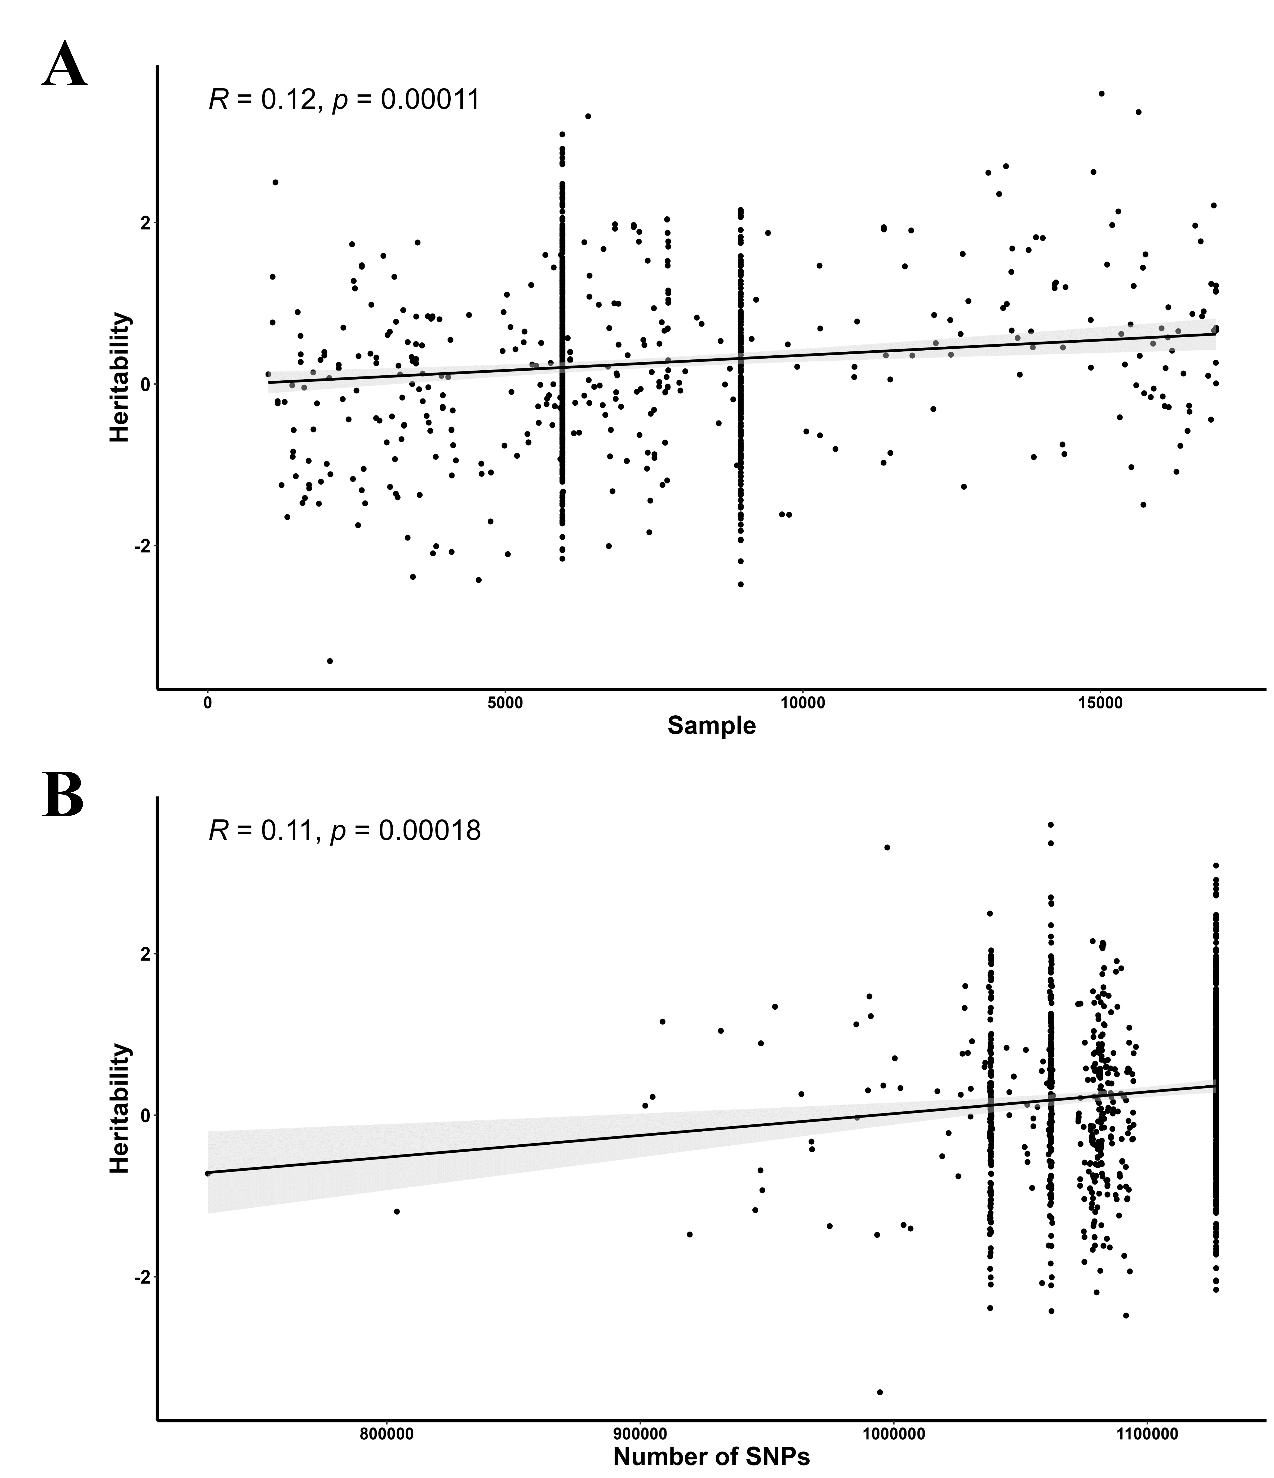


**Supplementary Figures 1. The relationship between the GM heritability and traits of the GWAS data. A.** Thescatter plot with linear regression line showing the relationship between the bacterium estimated heritability and sample size. **B.** Thescatter plot with linear regression line showing the relationship between the bacterium estimated heritability and the number of detected SNPs.


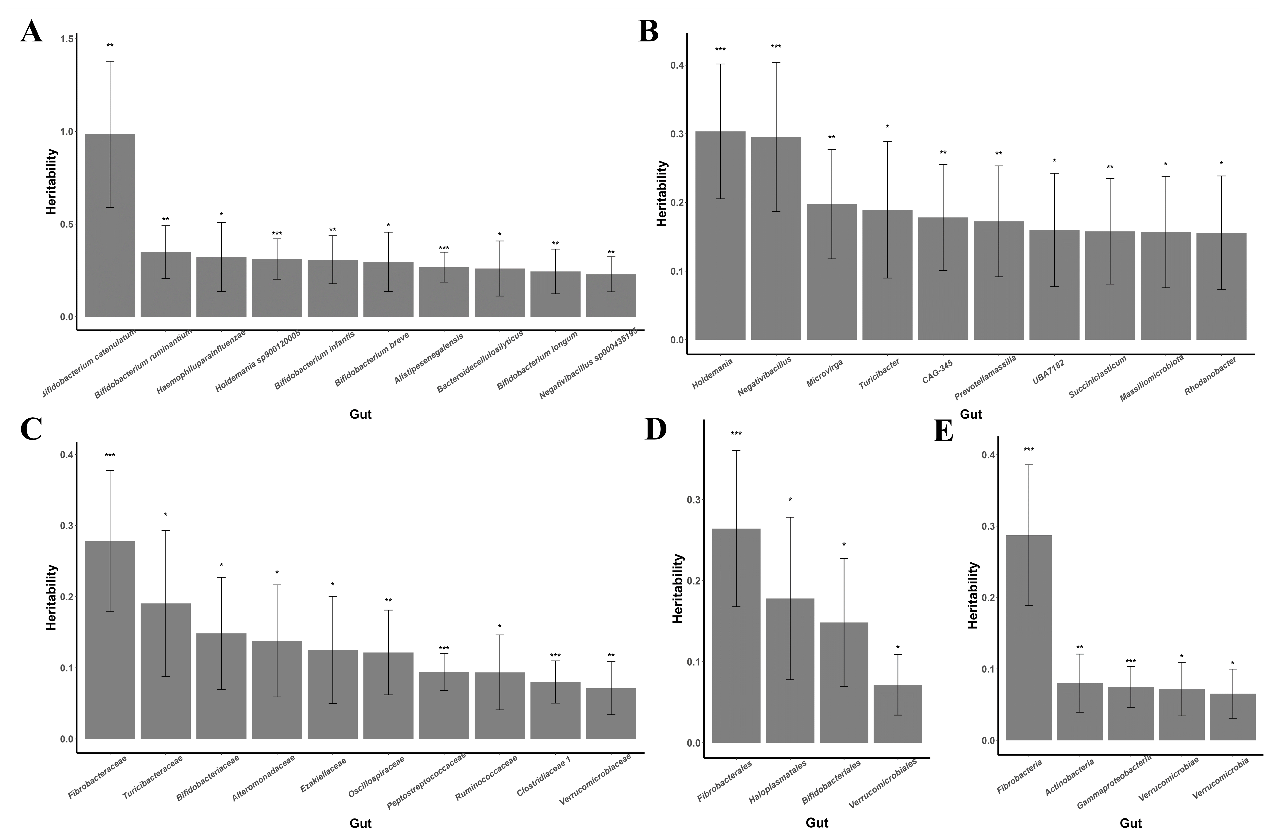


**Supplementary Figures 2 The highest estimated heritability of GM taxa in six different classification levels.** **A.** The bar chart showing the top 10 GM in 97 selected GM taxa with the highest heritability at the Species taxonomic level. **B.** The bar chart showing the top 10 GM in 97 selected GM taxa with the highest heritability at the Genus taxonomic level. **C.** The bar chart showing the top 10 GM in 97 selected GM taxa at the Family taxonomic level. **D**. The bar chart showing the selected GM taxa at the Order taxonomic level. **E.** The bar chart showing the selected GM taxa at the Class and

Phylum taxonomic level. ***: Z score of estimated the SNP heritability ≥ 2.58 (<0.01; two-side); **: Z score of estimated the SNP heritability ≥ 1.96 (<0.05; two-side); *: Z score of estimated the SNP heritability ≥ 1.64 (<0.05; one-side)
